# Supplementary material
Source: MDPI journal article supplement (https://www.mdpi.com/2673-8244/3/4/20)
Supplement: s1 [file s1]

Archive with 4 entries (4 files):
- bone_XRF.cpp
- convolution.cpp
- Raw data.xlsx
- Supplementary Figures.pdf
