# Supplementary material
Source: MDPI journal article supplement (https://www.mdpi.com/2673-8244/3/4/20)
Supplement: s1 [file s1 › Raw data.xlsx]

## Sheet: Attenuation Data
Photon energy (keV)	Number of counts	Number of counts	Number of counts	Number of counts	Number of counts	Number of counts	Number of counts	Number of counts	Number of counts	Number of counts	Number of counts	Number of counts	Number of counts	Number of counts	Number of counts	Number of counts	Number of counts	Number of counts	Number of counts	Number of counts	Number of counts
File name	Air_attenuation_50kV_0.02mA_filter_1_20s_1	Air_attenuation_50kV_0.02mA_filter_1_20s_2	Air_attenuation_50kV_0.02mA_filter_1_20s_3	Al_0.127mm_50kV_0.02mA_filter_1_20s_1	Al_0.127mm_50kV_0.02mA_filter_1_20s_2	Al_0.127mm_50kV_0.02mA_filter_1_20s_3	Al_0.254mm_50kV_0.02mA_filter_1_20s_1	Al_0.254mm_50kV_0.02mA_filter_1_20s_2	Al_0.254mm_50kV_0.02mA_filter_1_20s_3	Al_0.381mm_50kV_0.02mA_filter_1_20s_1	Al_0.381mm_50kV_0.02mA_filter_1_20s_2	Al_0.381mm_50kV_0.02mA_filter_1_20s_3	Al_0.508mm_50kV_0.02mA_filter_1_20s_1	Al_0.508mm_50kV_0.02mA_filter_1_20s_2	Al_0.508mm_50kV_0.02mA_filter_1_20s_3	Lamb_bone_0.297mm_50kV_0.02mA_filter_1_20s_1	Lamb_bone_0.297mm_50kV_0.02mA_filter_1_20s_2	Lamb_bone_0.297mm_50kV_0.02mA_filter_1_20s_3	Leather_2.46mm_50kV_0.02mA_filter_1_20s_1	Leather_2.46mm_50kV_0.02mA_filter_1_20s_2	Leather_2.46mm_50kV_0.02mA_filter_1_20s_3
0	0	0	0	0	0	0	0	0	0	0	0	0	0	0	0	0	0	0	0	0	0
0.024591	0	0	0	0	0	0	0	0	0	0	0	0	0	0	0	0	0	0	0	0	0
0.049182	0	0	0	0	0	0	0	0	0	0	0	0	0	0	0	0	0	0	0	0	0
0.073773	0	0	0	0	0	0	0	0	0	0	0	0	0	0	0	0	0	0	0	0	0
0.098364	0	0	0	0	0	0	0	0	0	0	0	0	0	0	0	0	0	0	0	0	0
0.122955	0	0	0	0	0	0	0	0	0	0	0	0	0	0	0	0	0	0	0	0	0
0.147546	0	0	0	0	0	0	0	0	0	0	0	0	0	0	0	0	0	0	0	0	0
0.172137	0	0	0	0	0	0	0	0	0	0	0	0	0	0	0	0	0	0	0	0	0
0.196728	0	0	0	0	0	0	0	0	0	0	0	0	0	0	0	0	0	0	0	0	0
0.221319	0	0	0	0	0	0	0	0	0	0	0	0	0	0	0	0	0	0	0	0	0
0.24591	0	0	0	0	0	0	0	0	0	0	0	0	0	0	0	0	0	0	0	0	0
0.270501	0	0	0	0	0	0	0	0	0	0	0	0	0	0	0	0	0	0	0	0	0
0.295092	0	0	0	0	0	0	0	0	0	0	0	0	0	0	0	0	0	0	0	0	0
0.319683	0	0	0	0	0	0	0	0	0	0	0	0	0	0	0	0	0	0	0	0	0
0.344274	0	0	0	0	0	0	0	0	0	0	0	0	0	0	0	0	0	0	0	0	0
0.368865	0	0	0	0	0	0	0	0	0	0	0	0	0	0	0	0	0	0	0	0	0
0.393456	0	0	0	0	0	0	0	0	0	0	0	0	0	0	0	0	0	0	0	0	0
0.418047	0	0	0	0	0	0	0	0	0	0	0	0	0	0	0	0	0	0	0	0	0
0.442638	0	0	0	0	0	0	0	0	0	0	0	0	0	0	0	0	0	0	0	0	0
0.467229	0	0	0	0	0	0	0	0	0	0	0	0	0	0	0	0	0	0	0	0	0
0.49182	18	17	24	17	22	17	16	13	19	12	12	14	14	14	12	20	20	8	17	20	12
0.516411	31	30	35	32	23	21	20	21	26	25	17	29	13	16	16	32	22	26	28	22	33
0.541002	28	28	27	20	27	25	24	27	25	20	15	19	15	25	26	22	24	16	23	24	26
0.565593	29	22	34	25	26	29	16	12	20	14	31	29	26	19	20	27	23	23	20	26	23
0.590184	22	27	24	23	23	31	24	34	20	24	21	25	15	16	20	24	21	19	20	28	28
0.614775	37	27	17	30	31	20	29	23	24	17	19	17	16	13	12	22	22	27	31	18	19
0.639366	21	23	41	24	25	21	23	27	18	20	28	22	20	20	23	30	15	21	21	18	33
0.663957	31	24	25	35	28	23	20	18	29	13	18	15	25	26	18	18	30	25	27	33	26
0.688548	25	27	19	16	25	26	22	24	29	25	21	8	28	14	17	19	22	28	29	35	35
0.713139	18	24	30	27	24	20	29	22	27	20	30	18	15	14	18	22	17	13	23	22	33
0.73773	24	23	20	30	32	18	27	24	21	21	17	22	22	10	24	27	28	17	15	11	18
0.762321	25	25	23	24	17	22	24	21	23	18	23	17	11	22	18	12	28	30	19	20	21
0.786912	28	21	29	17	20	23	15	18	26	20	19	16	21	17	21	25	32	25	28	23	28
0.811503	22	22	37	19	16	16	24	21	30	17	27	22	16	17	22	16	23	20	23	22	23
0.836094	31	24	32	27	22	21	17	25	26	19	28	19	17	18	20	21	15	18	20	23	22
0.860685	23	13	19	21	28	27	31	32	22	19	21	15	20	17	16	21	21	17	20	23	26
0.885276	13	28	18	24	19	26	25	19	31	18	22	15	20	16	15	21	14	19	22	12	28
0.909867	23	20	29	26	26	20	30	24	20	15	15	18	13	17	18	29	23	29	24	26	20
0.934458	28	25	18	24	22	18	22	20	21	19	17	18	22	15	13	18	21	29	27	12	26
0.959049	19	31	29	23	11	21	18	23	20	22	18	18	15	16	9	12	24	26	20	30	23
0.98364	22	21	29	27	30	14	16	19	25	18	22	15	17	11	12	21	19	28	29	25	24
1.00823	23	23	23	26	30	17	21	13	22	18	17	20	17	9	14	18	13	22	16	17	18
1.03282	35	23	21	13	23	21	22	22	21	17	23	19	18	16	26	18	19	22	22	19	30
1.05741	28	12	20	17	33	9	16	18	16	17	21	17	21	12	15	18	21	18	16	19	21
1.082	14	26	29	22	18	29	25	8	20	11	10	14	16	20	16	28	26	16	21	15	15
1.10659	12	21	23	23	24	14	16	15	27	12	18	18	18	18	13	13	17	24	24	25	25
1.13119	22	18	27	28	19	22	17	12	23	13	25	16	13	10	11	18	20	18	21	20	24
1.15578	22	19	24	26	24	20	20	19	28	16	21	19	16	6	10	22	10	20	14	20	18
1.18037	32	20	16	19	25	15	24	11	11	9	16	16	12	15	13	13	20	18	15	20	21
1.20496	22	19	16	9	25	12	17	24	18	12	17	27	21	9	18	16	16	23	25	14	21
1.22955	19	20	23	15	16	14	12	30	19	14	10	13	11	14	14	13	9	25	19	17	16
1.25414	22	16	22	20	15	17	12	20	17	16	16	13	17	11	15	13	12	21	9	16	18
1.27873	13	18	16	16	21	18	19	14	20	12	19	13	9	10	18	28	18	16	18	15	18
1.30332	19	19	24	23	20	19	17	12	13	11	12	14	10	13	11	21	15	19	19	13	19
1.32791	7	23	22	15	20	18	18	20	11	3	13	15	13	23	13	14	11	20	17	17	21
1.35251	17	21	21	20	16	10	13	19	21	15	16	18	10	17	13	18	25	7	11	14	17
1.3771	14	22	19	17	15	13	14	22	15	21	12	19	15	12	10	25	16	14	13	16	20
1.40169	16	14	12	10	11	18	13	13	18	15	15	20	14	4	16	6	14	10	19	25	16
1.42628	12	14	15	18	14	12	14	10	14	11	15	10	12	4	15	18	14	13	14	15	12
1.45087	20	22	21	20	17	18	14	14	21	15	13	21	11	12	13	9	13	14	18	13	14
1.47546	22	17	22	19	17	15	13	10	19	28	13	17	14	15	13	14	19	13	18	15	15
1.50005	16	15	19	9	14	14	14	16	14	18	15	13	9	12	8	14	14	20	12	21	15
1.52464	21	25	13	15	7	20	8	15	16	12	16	14	12	15	13	18	10	12	21	12	12
1.54923	14	16	12	7	11	13	8	16	9	13	13	14	18	8	10	14	11	9	16	14	8
1.57382	14	18	13	13	15	10	13	10	16	7	7	11	5	10	13	11	14	7	15	12	16
1.59841	12	16	16	11	12	16	11	9	7	12	9	13	5	10	10	14	10	19	11	9	9
1.62301	21	13	15	10	10	13	14	16	13	11	13	14	12	7	7	13	9	10	14	17	16
1.6476	12	16	17	16	20	10	12	12	13	8	8	7	10	11	8	9	13	13	10	5	8
1.67219	11	14	9	10	10	12	9	14	8	9	3	9	5	15	10	10	11	12	8	19	13
1.69678	16	12	13	9	8	14	5	14	10	11	10	11	13	11	12	9	11	6	14	9	11
1.72137	15	12	14	12	8	23	10	12	7	7	9	15	7	12	12	10	12	6	18	4	12
1.74596	9	13	16	10	14	9	13	8	12	10	13	10	9	7	6	14	13	9	14	14	10
1.77055	11	9	5	15	10	18	12	10	12	14	12	11	15	3	8	14	8	9	11	9	16
1.79514	9	15	17	13	13	12	12	16	11	8	10	11	7	7	6	14	12	11	13	10	10
1.81973	15	12	15	13	9	8	10	14	4	7	9	13	4	9	10	10	6	8	17	13	11
1.84432	16	8	7	10	6	9	8	7	10	5	2	7	3	12	10	10	8	11	3	10	7
1.86892	20	6	12	9	16	7	11	10	6	8	5	9	9	11	7	7	13	13	16	11	10
1.89351	14	6	8	14	8	11	7	12	11	10	13	5	4	10	7	10	8	8	8	7	12
1.9181	7	24	9	7	5	10	10	8	6	8	9	13	7	4	9	5	8	5	5	8	8
1.94269	13	8	11	10	8	12	13	7	8	8	5	14	5	5	5	11	7	3	9	10	6
1.96728	12	7	7	12	8	9	5	10	10	5	10	8	10	7	9	4	6	20	7	8	6
1.99187	10	12	4	16	9	9	7	11	4	7	10	6	7	8	13	9	10	9	12	11	11
2.01646	10	8	12	7	5	9	8	5	7	5	6	7	4	3	4	9	9	6	9	9	12
2.04105	11	9	13	11	2	8	14	7	7	5	7	8	8	8	8	7	6	7	8	7	9
2.06564	4	9	6	6	8	9	5	11	8	8	7	7	3	7	6	5	11	12	11	8	6
2.09023	6	13	5	10	5	11	7	9	10	4	10	4	10	11	8	7	13	9	13	5	8
2.11483	12	8	10	7	12	11	7	4	10	9	10	9	4	5	3	6	9	9	3	6	10
2.13942	4	10	7	5	5	7	2	9	13	12	7	10	6	7	5	6	5	10	15	13	11
2.16401	9	11	5	5	7	4	5	6	4	9	4	12	4	6	2	7	5	4	6	3	5
2.1886	5	7	4	7	7	9	10	5	6	4	6	7	6	5	7	8	4	10	6	11	3
2.21319	6	13	4	4	3	8	3	9	10	3	7	11	4	6	8	2	11	3	4	12	9
2.23778	11	9	9	10	8	11	4	9	4	4	6	12	5	7	4	4	6	8	6	6	9
2.26237	9	5	4	12	7	4	5	6	4	5	8	4	3	6	5	9	6	4	8	4	6
2.28696	8	4	3	7	11	10	6	4	3	7	6	12	3	5	2	4	8	6	6	5	8
2.31155	6	3	7	9	6	0	6	4	8	8	4	6	9	5	4	3	7	5	7	7	8
2.33615	6	12	6	6	6	3	7	5	7	6	2	8	2	2	3	4	3	6	6	5	3
2.36074	8	5	7	8	4	8	7	8	5	9	5	8	5	0	5	6	12	5	11	6	6
2.38533	4	7	8	6	5	1	8	6	5	4	5	3	4	4	2	9	8	4	6	5	3
2.40992	9	3	6	2	4	6	6	3	7	5	9	4	8	4	7	5	3	3	3	8	7
2.43451	6	7	12	3	3	9	5	4	6	2	7	5	6	4	3	10	3	6	3	6	3
2.4591	9	5	9	7	2	7	5	11	7	2	11	3	4	9	8	7	7	3	3	11	3
2.48369	11	9	3	7	5	6	4	3	8	5	2	3	1	1	3	8	4	4	5	4	4
2.50828	5	5	2	3	2	7	2	3	5	7	8	6	4	1	3	5	3	3	3	6	10
2.53287	13	2	5	4	6	7	5	7	7	7	4	6	3	2	5	7	6	1	9	10	3
2.55746	1	8	7	5	5	9	2	2	8	4	4	2	3	2	0	5	3	5	4	7	4
2.58205	5	3	2	2	6	5	5	5	5	4	3	4	1	4	6	5	3	3	4	7	6
2.60665	6	6	8	6	2	2	2	3	3	5	6	3	2	8	6	4	8	3	9	5	4
2.63124	5	6	7	0	5	4	3	3	5	4	5	4	2	1	6	5	4	8	6	8	3
2.65583	9	3	9	9	6	12	5	1	8	5	6	3	7	3	6	6	7	8	5	9	3
2.68042	1	5	10	6	11	4	10	6	5	6	7	1	0	1	2	7	8	7	9	7	8
2.70501	6	3	13	4	3	5	0	5	4	5	6	3	2	5	5	2	8	6	8	6	3
2.7296	3	12	6	6	6	6	8	5	4	3	6	1	5	2	10	6	4	5	2	2	2
2.75419	7	10	5	4	6	1	0	6	5	4	2	4	3	1	5	4	3	5	5	5	5
2.77878	5	4	5	3	6	8	4	0	6	4	2	7	3	5	4	6	5	2	6	1	3
2.80337	1	4	4	2	3	7	2	6	2	8	4	3	3	3	3	2	5	2	2	2	3
2.82796	3	4	7	7	5	2	3	4	3	1	2	2	3	2	5	0	1	6	3	7	1
2.85256	5	4	1	1	3	3	0	4	4	4	3	1	5	6	2	5	1	2	3	6	6
2.87715	6	3	6	8	4	4	4	5	10	1	2	4	3	3	2	3	4	3	6	5	4
2.90174	7	3	8	2	8	8	3	2	7	4	1	2	2	2	2	5	2	5	2	3	4
2.92633	9	3	3	5	3	3	5	4	3	1	6	2	3	6	2	5	7	4	7	5	3
2.95092	5	4	4	7	3	3	5	7	3	2	3	6	2	1	3	1	6	3	4	6	5
2.97551	3	9	0	7	2	3	5	2	6	4	2	4	3	1	1	6	3	5	3	3	2
3.0001	4	6	1	5	3	5	7	4	2	3	3	5	2	5	5	6	2	2	4	3	3
3.02469	5	5	5	4	7	1	6	3	6	2	4	5	4	6	4	2	0	4	5	7	4
3.04928	3	2	5	5	3	6	1	2	6	2	3	2	2	4	4	1	3	3	3	4	2
3.07388	2	7	4	1	1	4	2	2	2	1	3	1	0	5	6	3	0	5	5	3	6
3.09847	2	3	2	5	3	4	2	6	6	2	2	3	2	0	3	4	4	2	4	2	1
3.12306	7	5	2	2	2	2	3	3	2	3	2	2	0	3	3	4	3	3	3	2	0
3.14765	4	5	4	1	2	3	1	1	4	1	4	2	2	3	2	1	3	2	6	6	5
3.17224	4	1	7	5	6	0	2	5	0	4	7	1	1	6	4	5	5	3	3	3	4
3.19683	3	2	5	2	3	2	1	5	2	2	2	2	5	2	0	1	3	2	7	6	2
3.22142	6	5	1	4	3	0	3	4	2	2	4	1	1	5	1	2	5	4	3	2	4
3.24601	0	4	5	6	5	3	2	2	3	6	2	1	2	1	3	4	0	1	4	5	4
3.2706	4	6	5	1	3	0	4	1	3	2	2	2	1	2	3	3	3	3	4	1	9
3.29519	2	3	4	1	4	3	1	2	3	1	3	1	1	3	2	4	2	2	2	3	1
3.31978	2	4	4	2	4	3	4	2	1	0	4	1	6	1	1	1	3	2	1	4	2
3.34438	5	2	5	4	4	4	2	2	2	3	2	3	2	1	1	4	4	2	4	3	0
3.36897	2	5	1	0	5	2	3	0	3	0	3	1	3	7	5	4	4	4	5	2	0
3.39356	3	3	2	7	5	5	0	1	3	2	0	3	2	4	2	3	3	3	2	1	4
3.41815	3	2	1	2	2	5	5	2	6	2	2	2	5	1	5	4	4	6	2	4	2
3.44274	3	3	1	2	5	2	3	0	3	2	3	4	2	3	2	2	2	4	5	2	3
3.46733	0	2	1	2	4	1	3	6	1	1	1	3	2	0	1	2	4	1	4	1	4
3.49192	4	3	2	4	1	1	2	3	3	2	3	3	2	1	2	0	5	6	3	4	2
3.51651	6	6	4	2	3	0	1	5	5	1	2	1	5	0	3	3	3	4	3	2	2
3.5411	0	7	3	6	2	2	2	1	1	3	2	2	5	2	4	3	1	2	4	3	3
3.56569	3	4	4	7	3	2	0	3	2	1	2	1	2	2	0	0	4	4	4	5	5
3.59029	4	7	1	4	1	4	3	0	1	4	3	1	3	1	3	1	1	2	2	5	1
3.61488	2	3	0	3	5	3	0	0	3	1	1	1	3	3	0	0	7	4	3	6	1
3.63947	4	1	4	6	0	1	3	5	5	1	2	2	1	2	1	2	3	1	2	2	1
3.66406	1	3	3	5	2	3	1	4	3	3	3	0	2	6	5	6	6	0	3	3	1
3.68865	2	4	2	2	2	2	2	3	5	2	4	0	5	0	4	1	2	5	0	2	5
3.71324	3	3	4	1	4	2	2	1	1	3	1	1	2	1	1	1	3	4	1	1	2
3.73783	4	4	1	6	3	3	0	1	4	1	1	2	1	1	2	1	3	1	1	3	2
3.76242	1	3	2	1	1	1	2	5	2	2	3	5	1	1	3	2	3	1	4	3	1
3.78701	4	1	2	1	2	5	4	1	2	4	1	2	1	3	3	1	5	0	2	3	0
3.81161	3	2	4	2	1	2	3	1	0	2	1	3	1	4	1	2	0	2	6	1	0
3.8362	4	3	2	1	5	7	2	2	2	0	3	3	0	4	3	0	0	3	3	1	1
3.86079	3	4	1	0	1	4	2	1	0	1	1	2	1	0	1	0	3	3	2	4	5
3.88538	4	1	2	0	1	0	0	1	3	2	2	3	5	1	2	3	3	1	2	1	2
3.90997	4	2	1	4	3	2	0	4	1	4	3	0	3	2	2	4	1	4	4	2	3
3.93456	5	3	1	4	4	1	2	2	3	2	3	1	2	2	1	0	3	1	0	5	3
3.95915	0	1	2	3	6	2	7	6	5	2	1	1	1	2	0	4	1	3	2	1	4
3.98374	1	4	3	1	3	11	4	4	2	1	1	1	0	4	0	1	0	5	2	1	2
4.00833	1	3	1	4	2	4	4	3	1	1	0	2	3	1	1	0	0	2	1	2	2
4.03292	4	2	2	3	1	4	1	1	1	1	2	3	2	1	1	2	1	3	0	2	2
4.05752	0	0	2	2	2	2	2	3	3	2	0	1	1	2	3	1	4	4	1	2	3
4.08211	3	2	3	0	2	0	2	2	0	4	3	3	2	1	1	3	2	2	6	6	5
4.1067	2	4	2	6	4	1	1	2	1	3	2	2	1	3	2	5	2	3	2	2	3
4.13129	3	3	3	3	0	0	2	5	1	0	1	0	2	3	1	3	3	1	4	2	3
4.15588	5	4	4	3	1	2	4	2	1	1	2	3	2	2	4	3	0	2	1	2	1
4.18047	3	2	3	2	3	3	1	1	0	1	0	6	0	0	3	2	2	2	2	2	1
4.20506	1	2	1	2	2	3	2	1	3	3	1	0	3	1	4	1	1	3	3	2	0
4.22965	1	2	3	3	1	1	0	2	2	1	2	3	4	1	2	1	3	0	3	0	2
4.25424	0	2	2	4	1	0	2	2	1	2	1	1	1	0	2	0	1	1	2	2	1
4.27883	2	3	4	1	5	4	4	1	2	2	0	1	1	0	0	1	1	3	4	1	0
4.30342	3	4	2	2	3	4	1	5	2	1	1	3	3	2	4	2	3	2	1	3	1
4.32802	1	3	2	0	0	5	2	0	3	3	3	2	0	1	0	0	2	4	7	1	2
4.35261	5	1	2	2	2	3	4	0	1	5	1	2	0	3	0	0	2	0	1	1	5
4.3772	2	3	1	4	6	1	1	1	4	3	0	1	2	1	0	4	2	0	0	2	2
4.40179	5	1	3	4	3	5	0	2	3	0	1	3	4	1	0	4	3	5	1	3	0
4.42638	3	4	1	2	1	3	3	3	2	1	1	1	3	3	1	0	3	3	0	2	2
4.45097	5	3	2	1	4	2	3	5	0	2	3	0	1	3	0	3	1	1	3	2	1
4.47556	1	3	2	4	3	0	1	2	1	1	3	1	4	2	1	1	2	1	4	0	3
4.50015	4	2	3	3	1	5	1	1	3	1	0	2	1	1	2	2	2	1	3	3	1
4.52474	3	0	1	4	1	4	2	1	2	2	2	2	3	1	4	0	3	1	5	1	2
4.54934	3	3	4	0	1	2	0	1	2	0	0	2	2	1	4	1	3	1	1	4	1
4.57393	2	5	7	1	0	1	5	2	0	0	1	2	0	2	1	1	2	2	0	4	2
4.59852	4	5	1	2	2	3	2	0	1	1	2	0	1	1	5	0	0	1	3	1	1
4.62311	3	5	2	3	2	3	2	1	4	1	1	2	2	2	2	2	2	1	0	3	1
4.6477	1	0	2	3	4	2	2	3	1	0	3	1	1	2	1	3	4	1	1	2	0
4.67229	1	3	2	0	2	4	6	4	3	1	2	2	2	2	0	1	0	3	2	2	0
4.69688	1	2	0	2	2	0	3	1	0	0	1	2	2	3	1	3	1	1	2	2	3
4.72147	3	4	6	2	1	0	0	3	0	1	2	0	2	2	1	0	3	2	2	2	1
4.74606	2	2	2	2	1	0	3	0	2	2	0	1	0	1	2	1	4	1	0	3	2
4.77065	1	1	0	2	1	1	4	1	2	2	1	0	2	1	0	3	1	0	3	2	1
4.79525	1	1	4	2	3	1	2	3	1	4	1	1	4	0	1	3	2	3	4	3	3
4.81984	2	0	4	4	3	3	1	1	1	0	0	1	3	1	1	1	2	2	3	1	1
4.84443	2	3	1	3	1	2	2	1	2	0	1	0	2	5	1	2	0	2	1	3	2
4.86902	1	4	5	2	0	4	2	2	4	1	0	0	1	1	2	1	0	4	5	0	1
4.89361	1	3	5	1	2	0	3	2	1	2	3	1	0	1	1	3	0	2	4	1	1
4.9182	1	5	0	8	2	0	1	2	2	4	1	1	2	1	0	2	0	1	2	1	0
4.94279	3	0	2	4	4	2	1	1	2	3	1	3	0	3	0	1	1	1	2	1	1
4.96738	0	2	3	4	1	0	0	2	2	1	2	4	0	2	2	3	2	0	1	3	1
4.99197	1	2	4	3	2	2	0	2	1	1	2	2	1	2	0	1	2	2	1	0	2
5.01656	3	3	2	1	2	3	1	0	2	1	5	0	0	3	4	0	2	0	2	3	1
5.04115	0	1	2	1	0	2	2	3	1	0	2	0	1	2	2	1	0	3	3	3	3
5.06575	3	1	2	1	2	3	4	0	0	1	3	1	1	0	0	0	4	3	1	2	3
5.09034	2	5	0	0	3	1	2	2	1	1	1	2	3	0	2	1	3	2	3	0	0
5.11493	3	1	1	5	3	2	0	4	0	4	1	1	2	0	1	2	1	3	1	1	2
5.13952	2	4	2	1	3	1	1	1	3	1	2	1	1	1	1	1	3	0	0	3	3
5.16411	4	2	5	2	1	3	3	2	0	3	1	0	2	1	0	1	1	1	1	1	1
5.1887	1	6	3	3	3	2	1	1	0	1	1	0	2	1	0	1	0	3	3	1	2
5.21329	1	2	5	5	3	0	2	0	3	1	3	1	1	3	0	0	1	3	0	0	1
5.23788	3	4	2	3	3	4	0	2	1	3	0	0	3	1	0	0	1	3	1	1	3
5.26247	2	6	1	0	1	1	2	1	1	1	2	1	0	3	0	0	2	0	3	0	3
5.28707	3	5	1	3	3	2	3	3	1	1	2	1	4	0	1	4	2	2	2	1	0
5.31166	2	3	2	4	0	0	1	1	1	0	1	1	2	2	1	1	0	1	5	3	0
5.33625	2	1	1	1	2	3	0	0	1	1	1	1	1	0	0	2	1	2	3	2	2
5.36084	1	4	3	1	2	4	1	2	1	1	1	1	3	1	2	1	3	4	2	1	5
5.38543	3	2	1	0	1	1	1	0	2	0	1	3	3	1	1	2	2	2	6	1	0
5.41002	5	1	1	2	1	1	2	2	2	1	1	1	1	0	2	3	1	0	0	0	1
5.43461	2	1	4	3	2	4	0	2	1	1	3	2	1	1	2	5	1	5	4	2	1
5.4592	5	1	1	1	1	5	4	2	1	1	2	1	0	5	0	1	1	2	4	2	0
5.48379	4	2	1	2	1	0	3	1	2	0	0	1	2	1	0	0	3	1	0	1	2
5.50838	3	1	3	0	0	1	1	2	2	2	0	0	0	0	1	3	2	1	0	4	3
5.53298	4	2	5	4	4	4	0	4	1	1	1	0	2	3	3	1	1	1	1	2	2
5.55757	0	2	2	1	1	2	1	0	0	0	1	0	1	0	1	0	2	3	2	2	3
5.58216	0	3	4	2	3	2	3	1	1	2	2	1	2	2	1	1	4	0	3	0	1
5.60675	1	1	1	2	0	3	1	2	2	0	1	0	0	1	0	2	2	1	3	1	1
5.63134	3	0	1	0	1	2	0	2	1	2	2	2	1	1	0	3	1	4	3	3	5
5.65593	5	4	3	1	1	2	4	1	2	2	1	1	0	1	1	0	4	1	2	2	3
5.68052	2	2	0	2	0	0	1	0	0	2	2	2	0	0	0	3	2	3	2	1	1
5.70511	3	2	1	2	1	2	2	2	1	3	3	1	0	0	1	2	0	1	2	2	2
5.7297	1	3	3	2	0	3	2	2	0	0	2	1	1	1	0	1	4	1	1	3	1
5.75429	1	2	5	2	0	4	4	2	3	2	1	0	1	2	0	3	0	0	4	1	6
5.77888	3	3	3	0	2	3	2	1	1	0	0	0	1	0	0	2	5	1	1	1	1
5.80348	4	3	3	2	1	1	2	1	3	1	4	0	3	1	1	2	4	4	3	1	2
5.82807	6	5	2	1	0	4	2	3	4	3	2	2	0	0	1	2	3	1	1	2	0
5.85266	7	1	3	2	3	2	1	1	6	1	1	1	2	1	0	1	1	1	0	2	4
5.87725	4	5	2	3	5	5	4	2	2	2	2	4	0	0	3	1	2	2	0	2	5
5.90184	2	5	2	1	3	1	3	6	2	3	2	4	3	2	4	4	4	1	5	1	1
5.92643	4	2	3	1	2	5	3	1	4	0	2	3	2	2	3	0	1	0	4	3	1
5.95102	1	4	3	0	1	0	2	2	3	3	3	1	1	1	2	0	1	2	4	5	9
5.97561	1	1	2	3	2	1	3	1	1	0	1	0	1	2	2	4	0	0	1	1	4
6.0002	1	2	7	1	2	2	1	3	2	1	4	0	2	4	1	0	0	1	1	1	3
6.0248	1	1	2	0	1	0	1	1	4	1	1	1	0	0	0	1	3	1	2	3	0
6.04939	0	0	1	2	0	2	3	1	2	1	2	1	0	0	0	1	3	3	4	1	1
6.07398	0	3	0	2	2	1	0	2	1	2	1	2	0	1	0	1	0	1	4	2	0
6.09857	1	2	1	3	2	1	0	4	2	2	0	1	0	0	1	2	2	2	1	2	2
6.12316	2	4	1	1	3	0	0	2	1	1	0	0	1	0	1	0	1	2	0	0	0
6.14775	2	1	1	0	2	2	3	0	1	1	1	0	2	1	1	0	1	0	1	2	0
6.17234	2	1	1	1	1	4	2	1	1	0	1	0	3	0	1	2	1	1	1	0	2
6.19693	1	1	2	1	1	0	2	2	2	0	1	2	0	2	0	2	3	1	0	1	1
6.22152	4	1	3	1	3	1	1	1	1	1	1	3	0	0	2	2	2	0	1	1	3
6.24611	0	0	2	4	3	1	1	2	2	1	0	0	0	1	1	0	0	1	3	1	2
6.27071	6	3	1	3	3	1	1	2	1	1	2	0	1	0	3	4	2	1	1	2	2
6.2953	3	1	1	6	2	1	0	2	3	4	3	2	2	0	0	2	1	1	2	2	1
6.31989	3	2	2	0	1	3	5	1	0	4	3	2	1	1	3	0	2	4	4	5	3
6.34448	3	2	1	5	1	5	0	1	3	0	3	1	3	1	4	2	1	5	7	2	3
6.36907	0	3	4	5	2	4	1	2	3	2	1	2	4	2	0	1	1	3	7	3	1
6.39366	5	4	5	3	5	3	7	2	3	2	4	1	1	1	1	3	4	4	4	6	1
6.41825	4	3	1	2	1	1	1	3	1	2	1	1	1	1	2	3	0	2	0	3	0
6.44284	4	3	2	1	2	2	3	4	1	2	2	2	2	3	3	4	1	2	2	2	4
6.46743	2	2	1	2	3	0	4	1	2	3	0	2	0	1	2	3	1	2	0	0	2
6.49202	2	0	2	5	3	0	1	1	0	0	2	3	0	4	2	1	0	0	4	3	1
6.51661	2	8	1	1	3	1	5	1	1	0	0	2	3	2	2	1	2	5	0	2	3
6.54121	3	1	1	1	2	0	3	1	2	3	1	1	1	0	1	1	0	0	4	1	2
6.5658	1	2	1	1	2	4	1	0	2	1	2	1	2	0	1	1	2	1	3	2	6
6.59039	3	5	1	0	3	1	2	0	2	0	0	0	3	2	0	1	0	2	1	2	0
6.61498	2	1	4	4	1	0	2	1	2	1	1	1	2	0	1	1	3	6	0	0	1
6.63957	1	4	0	2	0	2	0	0	1	1	0	2	3	2	0	1	3	1	2	1	1
6.66416	1	0	1	3	3	0	2	1	4	3	3	2	0	2	1	3	1	1	3	2	6
6.68875	2	1	1	1	1	3	0	4	1	1	3	1	2	0	0	1	1	3	2	0	1
6.71334	3	1	4	2	4	1	0	0	2	1	2	1	1	0	0	1	1	2	2	3	2
6.73793	3	3	0	0	0	0	0	2	0	1	1	2	1	3	2	0	2	2	1	4	0
6.76253	0	1	1	2	3	2	2	1	0	0	0	2	0	0	3	1	4	0	2	1	2
6.78712	0	3	5	0	2	2	1	1	1	0	1	2	0	1	0	4	1	0	1	1	0
6.81171	2	3	1	0	3	1	2	1	2	2	1	2	6	0	0	1	1	1	2	0	2
6.8363	1	4	1	3	4	3	1	1	1	0	0	2	2	1	5	2	2	2	3	3	0
6.86089	3	2	1	4	1	1	0	2	1	2	1	1	2	0	1	1	1	2	0	0	0
6.88548	0	1	3	0	5	0	0	0	0	0	2	0	4	0	2	1	0	1	1	0	0
6.91007	0	4	1	4	1	2	3	0	1	0	0	0	2	0	2	1	1	2	5	2	1
6.93466	2	2	2	3	2	0	2	0	3	0	1	1	0	1	2	3	1	0	1	0	2
6.95925	0	0	2	1	1	0	3	2	0	1	1	3	0	1	3	1	0	1	1	1	2
6.98384	5	3	0	1	1	2	2	2	0	1	1	2	2	1	2	1	1	2	2	2	1
7.00844	4	4	3	2	3	2	1	2	1	2	3	0	0	0	1	3	2	1	0	1	0
7.03303	1	0	2	3	3	1	3	2	2	0	1	1	4	1	1	1	0	1	1	2	0
7.05762	0	2	3	3	4	2	1	2	2	3	2	2	1	0	4	1	2	1	2	2	1
7.08221	0	0	1	1	2	1	2	0	1	2	3	1	0	2	1	4	2	1	0	1	3
7.1068	2	1	3	2	4	1	1	0	4	3	2	0	1	2	1	0	1	1	4	2	4
7.13139	3	2	1	1	2	0	3	2	1	1	0	1	1	1	1	1	3	0	2	2	1
7.15598	2	2	1	1	2	5	4	3	4	1	3	0	1	0	0	4	0	1	1	3	3
7.18057	0	0	3	2	2	2	1	0	1	1	0	1	0	1	2	1	0	2	4	0	0
7.20516	0	3	2	0	3	1	1	5	3	0	0	0	1	1	2	2	2	4	2	0	3
7.22975	3	2	0	6	2	1	1	2	3	1	1	1	0	1	1	1	0	3	1	0	1
7.25434	4	3	4	2	5	2	0	1	2	0	0	0	0	1	1	1	2	2	1	2	4
7.27894	5	2	1	5	2	2	1	4	2	1	1	2	1	1	1	0	1	0	1	2	1
7.30353	5	5	6	1	1	2	0	3	2	3	1	2	1	2	2	1	1	2	3	1	1
7.32812	4	1	3	3	3	7	3	2	1	2	2	2	0	2	2	4	3	6	4	2	1
7.35271	5	5	5	6	4	6	2	3	2	3	2	3	3	2	2	4	3	2	2	5	3
7.3773	5	8	10	5	1	6	4	6	0	5	6	5	2	2	2	1	4	7	4	2	7
7.40189	6	12	16	6	5	9	8	8	4	3	5	4	8	2	5	6	9	2	5	6	9
7.42648	15	13	7	4	4	6	8	12	6	6	8	10	4	4	3	6	13	6	5	15	10
7.45107	16	12	17	10	6	6	14	6	5	6	1	6	4	7	4	7	5	7	12	10	12
7.47566	15	8	10	8	9	10	7	11	9	4	7	10	6	5	9	9	9	11	7	8	12
7.50026	11	12	12	14	10	10	8	7	10	9	3	6	4	7	6	6	3	10	8	10	8
7.52485	6	5	6	7	6	7	5	7	5	2	4	4	3	4	4	7	3	13	3	11	12
7.54944	3	8	12	5	6	3	5	4	5	7	3	2	2	2	4	3	6	5	5	4	5
7.57403	0	4	8	3	1	2	2	5	4	3	1	4	3	4	2	2	2	2	0	3	2
7.59862	4	0	6	3	0	3	1	1	1	1	2	5	4	0	2	1	2	2	1	2	4
7.62321	1	1	1	0	2	0	1	1	1	1	4	1	0	1	1	1	1	1	3	1	6
7.6478	4	1	2	2	2	2	4	1	2	1	2	0	1	1	3	0	0	3	1	3	5
7.67239	2	3	0	2	3	2	1	2	0	0	1	0	2	1	1	2	2	0	0	0	1
7.69698	1	3	5	1	1	2	4	1	1	3	3	1	1	0	0	2	3	1	2	0	0
7.72157	0	1	6	3	3	3	1	0	1	2	1	3	1	0	0	2	1	5	3	1	1
7.74617	3	1	4	2	1	4	4	1	2	1	0	0	0	2	0	0	0	1	2	2	2
7.77076	2	4	4	1	2	1	0	1	4	1	1	1	0	1	2	3	1	1	2	2	3
7.79535	2	5	0	2	4	1	4	2	1	0	3	1	0	2	1	2	1	3	3	2	4
7.81994	1	1	3	4	1	0	2	0	4	2	1	2	1	1	3	4	1	1	1	0	3
7.84453	4	3	4	2	3	0	0	0	1	2	0	0	2	1	0	2	2	1	1	3	5
7.86912	4	3	4	1	6	2	1	4	1	3	2	0	2	1	1	2	2	0	2	5	1
7.89371	4	9	7	7	4	7	5	1	1	2	4	5	0	1	3	7	5	0	1	4	4
7.9183	7	6	9	0	5	6	4	5	2	5	1	3	7	1	4	4	4	3	4	9	5
7.94289	7	13	13	13	9	8	12	4	7	6	6	7	5	5	7	7	6	4	8	5	11
7.96748	26	7	15	11	8	8	6	6	6	5	6	11	7	7	7	7	14	15	17	13	10
7.99207	17	18	15	15	16	9	16	16	11	14	13	12	8	12	10	8	9	15	15	11	12
8.01667	25	20	15	15	21	13	18	15	11	8	11	15	15	11	10	18	16	14	17	23	15
8.04126	14	16	25	17	15	18	9	17	18	9	13	5	13	14	6	10	9	5	17	19	17
8.06585	17	15	17	14	15	11	9	11	3	7	9	11	7	10	13	11	7	6	20	11	15
8.09044	8	10	13	7	11	10	11	14	9	3	3	8	11	9	8	14	8	12	10	11	14
8.11503	12	6	8	2	8	3	5	5	3	3	10	5	6	5	6	7	4	6	7	14	9
8.13962	5	4	7	6	7	5	7	5	2	2	3	2	3	2	2	3	3	7	3	7	6
8.16421	5	4	5	4	4	6	2	0	2	1	4	5	0	0	2	2	2	1	3	6	3
8.1888	9	12	9	10	5	2	2	0	3	1	2	1	0	2	0	1	1	4	6	2	2
8.21339	10	10	7	3	4	2	3	2	5	3	3	1	1	1	0	3	2	2	3	2	3
8.23799	11	11	13	1	4	6	4	5	4	3	3	4	2	0	0	0	3	1	8	5	6
8.26258	11	26	17	2	5	3	3	0	1	3	1	3	2	2	1	6	5	5	7	6	6
8.28717	24	23	28	9	2	2	4	2	2	0	4	5	0	0	0	1	1	1	6	10	7
8.31176	38	35	26	11	10	9	2	5	0	2	4	2	0	3	1	3	2	2	15	7	6
8.33635	45	42	33	8	11	13	3	3	4	2	2	3	0	5	2	3	3	7	9	10	9
8.36094	52	46	61	10	13	11	5	5	3	3	3	2	1	2	0	12	5	3	18	6	13
8.38553	54	50	50	14	7	7	4	2	4	2	1	3	1	0	0	0	8	3	13	22	17
8.41012	45	45	52	14	10	12	1	1	2	0	5	2	0	3	0	3	5	2	18	20	21
8.43471	36	32	39	7	5	6	2	3	2	1	2	1	3	0	0	3	4	6	18	12	7
8.4593	21	29	17	9	7	5	1	1	2	1	1	1	0	1	3	2	5	3	10	8	11
8.4839	10	21	8	5	4	5	0	2	2	1	2	2	2	0	1	2	2	4	6	3	4
8.50849	11	11	13	8	2	1	2	1	3	1	1	3	0	1	1	3	0	4	3	6	5
8.53308	8	7	7	4	6	1	0	1	4	0	1	2	2	0	2	3	1	3	2	3	4
8.55767	5	7	5	4	1	3	1	0	6	1	1	0	0	1	3	1	0	2	4	2	4
8.58226	9	6	4	2	4	1	1	2	1	1	1	1	0	2	2	1	2	1	3	6	4
8.60685	7	7	9	1	3	2	1	1	4	2	1	2	2	1	0	2	1	1	1	4	6
8.63144	6	6	6	4	3	2	0	2	0	1	1	1	1	2	0	3	2	3	0	3	4
8.65603	5	8	4	6	3	5	2	2	3	2	1	1	1	2	1	3	3	0	6	4	6
8.68062	5	10	5	2	3	4	2	1	3	3	1	0	2	5	2	0	2	5	5	8	3
8.70521	8	7	5	3	3	2	2	2	0	0	1	2	1	1	1	3	2	2	2	5	1
8.72981	13	7	10	6	1	7	3	1	2	0	1	1	1	1	1	1	1	2	1	3	4
8.7544	13	13	2	1	4	2	1	2	3	1	0	1	0	0	2	2	1	2	4	7	2
8.77899	9	10	10	5	3	2	2	1	2	0	2	3	1	2	2	3	4	2	4	4	10
8.80358	9	10	13	3	7	5	1	3	1	2	1	3	2	3	2	4	0	3	6	7	5
8.82817	11	8	13	4	9	2	1	2	5	2	1	3	1	0	4	3	3	8	3	7	7
8.85276	14	7	11	8	4	7	3	2	2	4	1	3	2	1	0	1	2	8	11	6	4
8.87735	8	11	14	8	8	3	6	2	2	3	6	1	2	1	1	2	4	7	7	4	1
8.90194	14	11	12	6	4	5	2	2	3	2	2	3	1	1	3	4	5	4	8	9	5
8.92653	16	12	13	2	5	5	1	5	2	2	4	3	2	1	2	3	4	7	4	5	6
8.95112	8	17	12	3	9	3	4	2	2	4	0	1	3	1	2	4	4	5	2	6	7
8.97571	13	12	14	6	3	5	1	1	1	1	4	0	0	1	1	0	3	4	4	3	2
9.00031	6	14	12	2	3	2	2	2	0	1	2	2	1	1	1	2	3	3	8	5	8
9.0249	9	22	20	4	7	4	4	4	1	1	1	5	0	2	3	8	2	2	9	7	8
9.04949	15	10	12	6	7	3	3	2	4	2	0	1	1	0	1	11	4	3	1	6	2
9.07408	15	19	9	6	2	5	4	0	4	1	3	0	4	0	1	2	4	2	3	8	7
9.09867	14	10	12	8	9	6	0	2	4	3	2	2	1	2	0	0	2	5	6	4	3
9.12326	22	13	17	3	2	5	0	0	3	3	1	0	1	6	1	2	1	4	6	9	5
9.14785	12	12	9	6	4	7	8	1	6	1	2	1	0	1	0	3	7	3	12	7	8
9.17244	17	17	9	7	8	6	2	2	6	0	1	1	0	1	0	4	3	3	12	10	8
9.19703	21	10	17	7	10	7	0	0	3	2	3	1	1	0	0	2	5	3	6	10	6
9.22162	18	23	22	11	7	5	1	0	2	4	0	1	0	0	1	2	7	3	7	8	8
9.24622	13	22	14	6	8	8	2	3	3	1	0	1	2	2	4	2	3	2	10	9	10
9.27081	21	24	13	6	5	7	4	5	4	1	5	1	4	0	0	1	4	5	12	11	11
9.2954	21	12	22	5	12	5	5	5	6	3	6	3	1	5	0	7	5	5	9	8	10
9.31999	18	21	21	20	7	6	2	2	4	2	0	2	1	0	2	3	4	2	10	10	17
9.34458	30	18	24	8	15	13	4	7	6	7	1	3	2	1	0	4	5	9	8	12	15
9.36917	37	25	33	11	8	12	6	3	8	1	4	0	2	1	0	5	6	5	13	15	24
9.39376	48	25	32	11	18	17	3	7	5	3	3	1	1	1	0	8	5	10	15	33	11
9.41835	56	52	46	25	26	17	10	8	7	3	3	3	1	2	1	4	1	8	31	28	24
9.44294	74	69	59	30	23	24	11	8	13	3	2	1	2	3	3	18	12	11	29	30	27
9.46753	88	90	80	35	48	22	14	19	11	4	4	6	2	1	4	10	24	17	33	38	38
9.49213	123	118	129	33	45	41	18	21	13	4	6	6	4	2	2	15	28	15	54	59	43
9.51672	196	146	154	64	58	66	24	29	20	7	13	8	5	3	4	16	18	24	75	74	77
9.54131	229	219	238	77	81	76	24	22	30	9	15	12	7	9	4	38	42	39	84	114	100
9.5659	300	330	297	125	143	120	46	44	49	19	10	10	10	6	8	58	48	56	143	154	147
9.59049	426	406	398	148	166	161	48	63	64	19	22	23	5	14	6	56	76	73	193	196	164
9.61508	456	475	502	191	162	178	65	61	69	25	26	28	10	15	10	82	94	71	208	221	222
9.63967	521	533	501	182	175	214	83	62	92	17	21	35	9	13	13	69	83	93	232	248	276
9.66426	502	546	514	192	196	171	88	76	72	31	35	26	8	8	4	79	81	89	240	246	248
9.68885	473	465	435	185	171	174	76	77	66	20	39	32	4	15	16	86	90	65	215	213	185
9.71345	393	402	393	141	167	160	60	67	48	25	23	21	6	11	11	81	59	61	202	175	207
9.73804	319	317	296	126	129	116	35	47	56	19	21	24	8	11	8	56	66	52	165	158	181
9.76263	287	270	279	120	96	90	43	39	44	17	16	20	7	8	10	45	56	46	145	108	116
9.78722	236	279	279	109	89	98	48	25	48	20	22	17	6	5	11	49	50	40	127	120	98
9.81181	293	251	263	105	90	105	42	41	36	26	11	22	11	13	9	36	46	43	110	137	111
9.8364	280	289	276	127	111	129	57	48	39	24	22	23	7	9	10	59	59	43	127	144	146
9.86099	341	333	328	141	134	138	63	53	55	22	18	32	12	19	9	54	69	45	145	154	170
9.88558	376	409	364	132	146	135	72	74	66	19	25	26	8	12	11	76	72	63	174	174	155
9.91017	383	402	431	172	156	165	79	65	70	28	33	37	16	15	10	79	80	96	212	192	191
9.93476	429	461	417	167	181	189	62	62	80	22	29	20	12	17	16	84	83	85	206	197	200
9.95936	399	387	376	150	163	169	75	66	86	25	27	32	13	12	6	75	79	79	184	188	181
9.98395	339	341	348	140	151	125	67	46	64	37	23	26	19	9	12	74	64	72	190	171	178
10.0085	311	272	279	113	127	116	49	42	38	21	28	16	4	11	8	48	66	63	138	148	133
10.0331	189	197	222	77	81	81	40	35	40	13	23	19	5	10	7	25	43	40	105	134	109
10.0577	142	171	157	73	62	61	19	22	27	7	9	12	8	1	8	30	28	35	95	82	85
10.0823	126	114	130	58	58	43	21	24	22	13	12	12	3	5	5	30	38	23	54	63	55
10.1069	109	84	95	29	38	48	14	31	25	8	8	15	6	3	9	25	11	26	52	50	53
10.1315	91	90	83	37	31	28	15	16	20	6	6	8	3	6	3	19	20	18	51	38	46
10.1561	76	75	64	44	37	26	14	17	19	10	14	4	6	6	3	14	16	17	45	49	45
10.1807	90	78	97	22	36	39	14	14	20	6	6	9	1	4	0	28	19	25	43	44	50
10.2053	75	68	76	29	30	30	13	12	10	6	6	10	4	4	5	16	16	22	29	26	38
10.2299	56	72	65	19	29	31	7	20	15	6	8	11	6	3	1	13	14	16	41	34	33
10.2544	63	50	59	22	34	28	21	14	13	11	5	6	6	4	3	17	12	13	39	39	34
10.279	62	70	56	29	31	44	19	15	7	9	5	9	2	4	3	11	20	11	38	33	36
10.3036	58	61	63	30	22	24	11	10	14	3	5	8	4	0	4	14	15	15	24	28	37
10.3282	52	49	45	32	26	30	12	9	8	2	2	4	7	1	5	11	10	14	28	24	36
10.3528	60	59	57	32	25	30	8	11	15	6	5	5	5	4	4	12	14	10	26	35	39
10.3774	51	53	63	36	27	20	17	7	16	5	5	2	5	3	2	15	12	10	33	37	21
10.402	59	57	55	24	28	30	12	15	22	5	6	3	4	6	10	15	20	15	30	31	33
10.4266	67	61	59	29	36	23	16	15	16	7	4	12	2	4	5	20	20	17	35	35	45
10.4512	66	74	61	27	32	23	14	13	19	8	5	5	2	1	5	13	16	14	43	38	32
10.4758	71	66	86	28	37	24	12	17	15	4	3	8	3	5	7	16	13	22	38	44	45
10.5004	51	62	69	33	39	37	18	18	14	11	7	2	7	1	2	21	17	17	37	27	41
10.5249	74	72	80	38	42	30	15	14	19	12	3	7	6	3	4	18	17	16	26	46	31
10.5495	61	68	73	28	42	40	15	24	22	8	9	11	3	3	2	17	20	16	39	34	38
10.5741	67	89	57	31	35	37	15	23	20	10	7	10	5	2	7	20	14	13	46	49	39
10.5987	71	76	77	36	28	41	18	17	14	10	7	7	3	3	9	17	14	24	44	40	35
10.6233	86	88	76	37	45	34	32	20	26	9	8	14	6	4	9	21	27	22	48	54	36
10.6479	69	99	97	41	34	43	17	20	18	10	12	10	4	6	1	21	26	24	38	46	47
10.6725	83	80	94	44	28	40	20	22	24	13	12	5	5	5	6	27	16	23	58	52	52
10.6971	80	82	87	40	37	34	17	15	25	11	12	14	7	11	13	21	24	15	48	38	42
10.7217	87	82	85	34	48	35	25	17	22	10	12	17	3	3	5	19	7	14	46	52	49
10.7463	75	90	80	51	45	41	24	19	16	9	8	11	10	7	12	27	19	24	55	52	50
10.7709	86	79	91	50	38	46	30	21	24	13	9	13	8	10	6	25	32	31	54	44	53
10.7954	87	89	106	47	48	37	28	30	15	12	21	15	6	7	3	27	27	27	56	54	59
10.82	108	97	93	53	43	60	21	37	23	19	21	13	10	7	8	32	22	26	66	42	46
10.8446	112	126	96	62	46	55	33	26	34	13	11	15	17	13	8	26	26	28	67	63	69
10.8692	113	103	111	58	54	43	31	28	36	20	16	14	11	10	9	36	24	21	53	76	77
10.8938	106	128	109	58	67	69	42	44	31	19	15	16	7	15	13	35	37	31	71	69	77
10.9184	131	108	130	63	56	66	32	36	32	13	15	25	7	9	10	32	47	37	69	58	68
10.943	137	110	115	75	63	70	37	40	27	18	27	16	12	13	4	36	33	45	72	70	76
10.9676	123	125	137	79	66	65	36	35	32	21	16	23	14	12	12	33	47	36	61	76	71
10.9922	126	139	128	61	67	84	33	36	32	19	20	21	13	14	10	42	35	36	72	78	83
11.0168	120	122	130	57	75	62	28	31	39	20	19	19	11	18	6	38	34	35	91	88	70
11.0414	130	161	134	57	85	83	32	41	48	23	20	28	16	10	12	45	44	38	86	87	88
11.066	143	139	145	81	74	77	41	41	45	26	23	25	12	10	14	54	36	36	77	93	91
11.0905	186	167	181	106	85	80	39	55	38	30	33	30	14	14	14	49	59	68	139	121	106
11.1151	230	210	212	111	129	122	63	66	71	29	43	34	21	31	24	66	76	63	150	125	129
11.1397	284	286	305	151	161	142	81	88	78	52	45	52	18	26	22	87	91	92	182	159	194
11.1643	389	352	374	198	194	187	125	111	119	41	76	58	39	34	30	115	116	129	245	211	231
11.1889	474	443	494	254	269	264	134	136	136	89	86	71	32	38	51	171	141	150	276	260	310
11.2135	531	568	598	266	275	286	169	177	169	87	91	97	51	48	44	155	167	178	351	323	362
11.2381	634	608	575	357	323	323	179	188	195	107	102	101	55	70	47	192	202	191	366	399	382
11.2627	653	620	604	340	351	313	189	212	198	105	95	98	68	62	72	180	188	194	344	363	391
11.2873	582	569	598	314	329	324	187	199	173	112	101	99	55	64	48	170	199	184	377	359	385
11.3119	515	541	476	292	285	255	149	164	159	91	93	101	47	53	59	182	159	160	307	321	288
11.3365	436	389	404	217	232	221	130	154	121	82	76	70	44	31	38	154	167	151	287	274	240
11.361	391	383	355	176	165	186	119	114	97	57	74	63	22	40	35	124	120	125	214	238	244
11.3856	291	229	271	142	177	147	85	98	99	43	46	48	32	25	28	87	84	80	169	184	170
11.4102	272	237	258	145	105	152	85	89	58	42	60	50	23	22	24	81	82	82	150	136	158
11.4348	236	258	248	147	139	115	75	67	85	48	46	29	27	22	20	61	87	81	140	167	133
11.4594	262	237	252	108	147	152	76	76	90	57	42	60	37	21	24	92	84	83	155	145	152
11.484	252	240	245	136	136	151	102	82	65	41	44	48	28	33	21	94	73	94	158	180	147
11.5086	287	284	257	141	145	170	104	93	91	47	65	52	25	38	31	99	89	99	194	204	195
11.5332	300	321	325	162	182	188	85	105	105	65	63	58	27	30	21	112	102	120	197	226	192
11.5578	329	314	342	169	181	175	99	104	122	64	67	72	44	45	32	105	109	99	211	195	217
11.5824	347	310	357	213	180	214	131	106	130	54	73	61	39	33	46	124	135	142	204	223	239
11.607	357	387	322	196	229	171	125	122	124	74	80	72	23	35	52	119	114	112	224	246	223
11.6315	329	354	350	231	181	223	135	105	131	69	90	78	41	43	37	134	147	132	254	239	220
11.6561	340	329	335	191	224	178	108	140	120	59	78	69	39	43	31	99	115	142	236	216	221
11.6807	311	305	348	180	170	182	114	112	106	62	48	56	43	37	34	124	107	100	197	195	203
11.7053	300	263	272	150	176	179	116	100	106	62	50	56	34	28	39	104	103	84	194	162	176
11.7299	269	255	226	141	142	154	75	89	91	45	58	57	35	34	27	79	103	108	155	145	175
11.7545	219	207	213	126	122	138	80	64	82	40	50	61	29	32	31	94	87	89	167	121	163
11.7791	196	213	229	131	135	129	63	49	86	51	52	38	33	28	30	98	86	82	134	143	122
11.8037	185	220	227	109	119	116	89	78	74	36	44	47	20	20	29	83	79	71	142	141	139
11.8283	187	188	207	107	104	125	73	72	91	43	41	40	16	24	26	82	74	76	141	113	131
11.8529	197	190	207	128	119	114	75	83	75	53	43	54	22	29	32	79	60	69	137	127	151
11.8775	181	203	209	107	119	133	68	51	84	50	50	45	24	31	35	73	73	89	143	142	138
11.902	199	209	221	102	156	121	86	78	88	54	45	49	25	27	24	85	71	77	154	148	135
11.9266	207	241	217	143	142	137	78	85	83	60	36	48	27	33	33	105	84	74	139	151	152
11.9512	226	223	229	156	161	138	85	89	89	50	53	47	37	36	37	88	69	78	138	148	146
11.9758	257	253	246	158	147	144	81	85	103	52	69	54	31	35	29	101	116	90	162	192	153
12.0004	256	236	221	176	166	149	117	77	84	57	58	49	32	42	27	100	103	100	170	188	176
12.025	239	263	249	142	159	164	88	84	77	66	62	65	38	34	30	79	95	86	157	174	158
12.0496	241	268	234	156	151	137	99	93	96	58	48	54	40	44	33	81	106	99	172	171	161
12.0742	258	260	228	170	151	154	115	97	102	53	73	67	50	29	41	97	131	87	171	162	192
12.0988	242	223	267	144	116	117	94	91	102	49	59	63	30	35	37	94	91	92	169	185	164
12.1234	249	249	214	150	110	148	90	78	89	60	60	48	22	43	36	77	87	89	140	130	143
12.148	241	216	225	140	143	126	97	80	69	56	59	52	35	29	33	90	85	83	155	155	154
12.1725	232	222	206	142	145	131	85	84	62	55	57	45	31	34	39	100	85	81	140	147	151
12.1971	198	230	264	124	134	130	86	74	87	38	65	53	34	35	40	96	100	71	110	153	127
12.2217	211	223	207	125	140	150	89	93	97	50	65	57	37	38	39	93	89	104	148	148	156
12.2463	210	220	229	142	151	135	105	86	76	55	65	63	40	39	36	96	87	95	165	147	145
12.2709	243	223	238	132	131	127	95	95	90	66	76	57	39	34	43	102	93	87	201	148	132
12.2955	208	227	218	144	128	135	83	95	103	55	67	62	34	39	44	105	85	97	161	151	134
12.3201	224	244	242	139	147	134	104	78	71	46	60	52	40	40	43	103	86	98	162	165	154
12.3447	234	264	219	155	155	150	98	96	101	59	69	68	37	39	48	88	114	82	178	153	166
12.3693	222	214	215	163	149	149	88	99	104	57	54	58	41	46	47	99	104	102	162	186	169
12.3939	242	259	250	155	164	156	83	113	96	69	57	66	39	39	39	101	98	105	166	163	160
12.4185	257	269	253	152	173	152	101	93	79	64	80	72	40	29	43	98	95	97	141	167	168
12.443	235	245	243	140	152	158	120	115	108	70	58	54	50	32	47	121	117	104	179	144	177
12.4676	251	234	233	167	153	197	102	85	84	67	84	70	41	38	37	113	120	108	198	162	171
12.4922	286	256	246	161	170	169	83	119	96	66	61	65	42	51	43	131	111	107	176	192	177
12.5168	239	267	268	168	154	173	108	126	123	73	76	78	51	38	50	125	110	103	185	179	184
12.5414	229	253	260	161	175	169	91	107	101	72	71	74	37	33	48	128	119	124	169	182	186
12.566	253	256	279	177	159	154	112	109	107	58	66	78	44	50	60	95	130	109	170	201	188
12.5906	253	304	274	153	177	192	114	114	103	75	82	72	67	64	50	140	118	103	211	180	185
12.6152	262	287	258	189	158	175	130	109	108	73	86	86	51	45	50	135	98	130	188	181	209
12.6398	254	277	283	201	187	198	122	135	121	92	90	81	44	63	60	108	112	116	203	178	196
12.6644	290	261	262	179	182	164	128	135	105	106	95	64	52	59	50	114	141	124	208	215	215
12.689	286	276	268	196	197	196	129	125	139	72	82	86	50	53	55	124	142	123	209	218	207
12.7135	316	321	285	175	178	157	128	115	101	97	104	85	64	55	56	118	121	142	237	204	188
12.7381	312	296	295	219	195	187	127	128	125	100	96	93	58	42	64	137	121	131	212	211	239
12.7627	286	297	296	225	191	176	111	139	124	77	89	88	67	67	56	129	146	127	210	222	229
12.7873	318	287	319	176	218	202	140	119	156	84	77	87	49	78	62	143	144	159	210	212	213
12.8119	297	309	308	199	204	179	124	136	144	82	95	98	62	72	67	125	142	123	225	217	217
12.8365	288	277	303	200	189	221	150	120	142	84	81	97	60	67	62	162	135	140	229	222	226
12.8611	263	309	307	179	232	188	139	153	150	96	108	93	75	61	66	139	150	141	207	207	220
12.8857	264	295	338	197	197	200	136	133	138	81	105	113	72	70	74	175	149	146	217	248	245
12.9103	308	310	335	224	205	217	141	147	136	87	107	98	79	59	75	160	156	148	239	231	264
12.9349	278	341	279	195	217	216	138	154	144	100	103	90	79	72	55	142	139	139	247	229	225
12.9595	309	304	305	204	198	217	162	131	155	110	93	96	59	73	87	153	153	161	232	234	239
12.984	322	326	292	216	222	193	150	158	155	118	105	107	75	64	81	162	166	161	212	240	232
13.0086	338	323	304	234	207	209	158	119	145	112	99	81	64	70	58	161	146	155	254	245	224
13.0332	326	330	302	217	196	221	145	139	139	94	85	107	76	81	71	139	187	136	200	249	209
13.0578	318	319	296	225	194	212	152	129	145	109	122	107	70	54	50	163	150	168	241	251	226
13.0824	365	322	323	247	199	239	154	167	153	122	108	102	76	64	75	173	154	174	249	226	253
13.107	317	298	328	222	195	221	146	159	151	99	117	115	61	95	70	146	161	151	231	228	225
13.1316	345	289	327	237	240	196	153	184	166	102	102	105	67	87	71	157	166	171	231	248	255
13.1562	338	337	300	223	212	234	170	149	164	120	131	125	80	81	77	155	144	148	237	208	240
13.1808	304	329	319	212	228	205	183	160	178	111	102	108	79	73	78	176	172	162	252	226	265
13.2054	349	353	320	233	247	238	164	153	153	117	132	100	93	77	80	183	162	151	251	228	265
13.23	335	336	312	229	235	230	133	148	165	98	114	94	78	89	79	179	177	153	245	250	247
13.2545	314	346	334	268	241	214	151	178	165	116	127	122	85	100	73	178	144	182	248	241	248
13.2791	339	360	346	238	226	242	161	191	170	109	127	119	84	80	91	164	177	176	263	271	267
13.3037	350	327	345	247	221	230	152	148	159	124	113	124	89	69	73	179	167	172	263	266	254
13.3283	323	382	346	243	242	256	178	172	179	130	111	143	86	90	86	178	184	161	260	265	266
13.3529	370	355	358	222	277	252	153	162	174	133	130	121	57	90	98	166	188	189	225	254	257
13.3775	383	354	344	255	225	250	174	158	175	127	121	133	90	89	92	174	204	187	276	258	268
13.4021	346	372	319	264	244	231	181	180	174	114	139	122	97	95	94	200	198	166	237	296	236
13.4267	365	364	376	240	258	246	199	174	184	105	124	117	90	78	87	183	193	174	273	274	256
13.4513	353	344	386	261	248	283	188	177	186	123	141	126	92	88	85	176	225	181	280	286	272
13.4759	330	360	349	266	280	269	167	198	194	144	131	140	96	101	88	191	178	172	270	279	283
13.5005	348	390	359	266	279	253	203	199	186	132	123	120	93	90	105	178	201	186	306	288	273
13.5251	370	355	362	249	257	246	176	185	196	132	126	140	91	97	88	199	183	195	281	257	263
13.5496	331	372	376	240	280	261	174	177	179	142	137	149	112	96	101	183	198	190	269	256	273
13.5742	360	392	359	269	258	248	194	193	196	151	125	153	88	106	95	205	195	183	300	265	295
13.5988	365	360	372	255	243	267	216	208	174	149	158	150	105	88	107	201	202	199	289	272	279
13.6234	402	422	376	255	281	270	218	207	182	130	158	143	100	96	108	185	190	196	276	280	312
13.648	404	415	374	299	278	223	205	223	199	134	148	147	113	112	117	191	218	198	253	302	310
13.6726	381	396	389	278	279	262	226	217	182	160	150	151	104	113	125	177	191	182	299	294	270
13.6972	394	391	369	281	253	270	169	168	208	135	137	158	105	137	110	224	200	213	281	270	317
13.7218	375	373	409	306	293	271	232	194	222	154	135	145	125	100	116	203	232	174	315	285	286
13.7464	397	398	372	289	308	302	188	232	227	168	143	140	123	102	105	198	204	217	300	310	302
13.771	416	418	385	287	297	276	209	211	194	149	149	168	132	112	129	211	213	215	274	296	314
13.7956	366	410	426	267	275	293	207	214	208	165	168	157	114	126	115	221	231	230	280	319	316
13.8201	420	424	409	278	292	272	207	210	210	151	155	160	119	100	122	193	185	218	316	292	298
13.8447	416	382	407	318	256	269	219	219	232	144	172	178	118	124	137	223	222	195	280	331	350
13.8693	414	441	415	291	310	289	247	213	221	156	166	160	108	115	120	243	210	209	310	311	310
13.8939	382	406	429	278	342	330	216	184	204	165	151	181	127	119	112	254	218	226	289	308	301
13.9185	410	424	415	282	306	303	239	250	208	171	169	181	130	126	112	207	232	246	302	311	279
13.9431	428	418	413	297	304	332	225	233	205	171	179	177	139	123	144	225	241	250	321	324	289
13.9677	451	404	419	304	304	271	228	255	235	148	138	186	107	120	120	259	206	231	335	313	346
13.9923	389	429	424	347	325	300	224	229	218	174	167	207	123	128	142	249	246	250	313	320	319
14.0169	457	419	467	334	305	277	235	220	256	187	159	193	146	115	146	230	220	248	342	326	315
14.0415	450	451	430	325	297	297	251	229	257	179	147	192	130	126	115	236	250	230	306	371	337
14.0661	426	400	429	317	327	310	223	215	234	152	184	177	123	129	127	261	251	237	293	324	289
14.0906	431	447	475	299	316	288	208	237	239	143	167	223	128	130	151	224	249	243	334	322	353
14.1152	443	440	422	332	330	343	247	241	242	182	174	187	135	136	123	244	235	255	301	334	292
14.1398	435	444	448	356	317	320	215	235	253	196	184	200	134	129	133	254	242	256	361	353	331
14.1644	452	433	430	320	324	318	249	234	259	187	186	180	119	137	130	247	251	220	345	332	341
14.189	464	468	424	327	332	289	219	252	273	193	190	182	139	143	116	232	251	249	354	328	341
14.2136	468	440	476	325	348	319	248	240	244	199	200	193	126	120	150	266	256	231	291	339	317
14.2382	439	450	439	366	340	335	241	261	254	198	184	186	138	161	136	286	277	286	343	356	366
14.2628	469	461	386	336	338	341	244	262	275	194	208	189	123	141	167	253	248	261	328	327	352
14.2874	441	456	437	348	355	335	285	294	242	186	185	201	154	132	168	243	259	255	350	313	337
14.312	436	445	443	332	365	339	300	293	233	189	187	193	148	167	147	248	295	243	349	347	343
14.3366	428	429	446	374	324	374	262	283	259	169	211	196	142	142	186	258	245	246	338	402	358
14.3611	465	439	441	324	317	325	255	276	251	179	179	191	140	142	155	274	252	292	377	367	357
14.3857	477	453	443	300	370	352	258	280	270	198	191	190	164	160	148	258	254	261	349	375	382
14.4103	422	454	452	350	329	334	252	259	293	215	209	215	158	161	151	279	259	281	376	376	360
14.4349	495	488	482	325	371	351	281	267	257	205	214	198	179	154	152	266	261	294	351	394	353
14.4595	489	475	466	326	363	362	287	271	267	198	201	195	152	138	166	294	269	276	386	380	375
14.4841	478	460	473	374	344	333	277	272	309	215	220	209	163	150	158	277	289	260	357	362	359
14.5087	458	457	447	351	337	343	267	267	277	202	222	196	163	158	159	293	285	261	349	361	334
14.5333	499	475	485	356	382	375	282	304	260	217	221	219	134	153	151	279	267	274	363	371	377
14.5579	470	457	463	383	355	365	285	274	275	236	193	205	170	122	180	300	266	294	405	323	365
14.5825	440	455	458	382	342	371	290	283	287	220	190	207	169	141	142	292	257	274	352	396	364
14.6071	493	487	487	369	351	355	273	279	272	223	235	224	162	159	179	273	269	278	355	343	362
14.6316	458	494	485	343	350	367	263	303	276	212	210	219	154	168	163	294	263	291	407	362	363
14.6562	460	461	478	360	336	343	278	290	261	255	221	216	140	173	153	297	265	277	386	374	362
14.6808	528	467	492	359	388	376	290	300	285	214	218	200	161	163	186	302	296	303	376	415	421
14.7054	485	444	481	359	362	365	291	265	302	204	206	230	150	188	175	263	296	295	340	362	374
14.73	516	498	478	353	379	396	262	276	271	221	228	218	182	200	173	282	267	282	380	386	385
14.7546	469	480	473	373	380	343	270	277	265	242	199	197	180	197	165	279	311	309	391	371	378
14.7792	524	478	451	361	366	374	297	307	279	220	203	234	156	179	182	272	289	299	379	359	370
14.8038	485	488	485	351	371	376	325	284	312	246	241	217	184	150	187	301	297	315	400	382	402
14.8284	475	504	495	382	372	371	303	284	276	250	207	231	174	180	167	292	277	299	399	353	348
14.853	494	446	470	390	378	391	308	311	279	270	227	217	198	167	166	324	309	297	397	404	403
14.8776	468	465	492	386	366	363	274	320	322	235	241	217	181	188	175	292	291	294	400	354	397
14.9021	493	505	477	399	370	332	315	294	287	233	237	225	187	194	177	274	317	289	403	353	386
14.9267	485	526	468	407	387	405	309	300	305	237	263	215	179	180	176	309	306	311	387	418	388
14.9513	498	511	519	418	401	373	319	329	295	244	250	239	160	168	201	282	312	301	401	356	392
14.9759	465	499	503	376	362	361	309	302	311	258	243	218	180	201	186	289	318	311	381	369	383
15.0005	507	452	501	357	409	384	309	310	284	233	239	229	189	178	177	305	315	300	370	417	394
15.0251	455	507	475	362	408	389	293	306	291	258	260	248	188	179	189	291	341	295	413	398	404
15.0497	487	531	479	399	389	388	319	294	297	236	261	269	171	195	191	333	315	346	411	424	426
15.0743	498	463	487	396	387	367	297	317	323	264	264	253	207	194	218	307	283	326	372	362	387
15.0989	533	504	474	378	398	342	306	293	301	266	240	237	196	197	175	302	301	331	398	420	387
15.1235	500	507	546	396	368	382	275	285	313	261	260	257	196	213	183	331	289	307	402	394	420
15.1481	529	519	503	376	393	416	321	294	294	267	235	230	207	186	180	274	293	318	376	407	380
15.1726	510	491	474	370	399	421	332	289	291	267	237	249	196	196	192	293	329	314	412	408	406
15.1972	477	497	459	406	400	391	316	289	292	234	252	245	203	181	201	363	296	315	400	376	398
15.2218	470	492	493	381	365	431	303	339	306	246	265	203	205	170	206	296	317	305	376	391	377
15.2464	512	460	495	369	411	389	278	304	318	260	238	240	198	209	213	329	298	283	378	421	404
15.271	510	488	556	403	382	392	292	322	303	241	259	241	194	211	207	309	309	335	418	437	408
15.2956	479	469	499	392	389	371	316	300	331	240	255	250	218	190	216	323	283	316	358	381	418
15.3202	522	490	493	383	423	378	329	284	305	249	224	251	176	189	198	308	309	335	393	370	390
15.3448	507	488	498	391	367	377	285	318	323	246	249	271	222	182	203	310	332	310	419	411	412
15.3694	467	492	449	402	414	394	312	349	333	261	293	244	208	200	215	320	311	305	440	429	399
15.394	506	503	499	379	416	404	316	330	336	272	268	255	188	204	197	294	354	300	362	426	399
15.4186	507	516	465	386	411	397	304	330	295	270	272	294	196	216	191	315	317	312	373	375	397
15.4431	492	461	467	397	389	381	305	314	301	266	262	267	207	204	196	327	309	341	425	386	392
15.4677	516	461	480	430	350	401	284	316	309	238	270	256	223	223	212	302	293	330	423	404	368
15.4923	464	490	485	417	408	414	317	345	312	258	258	248	212	204	212	326	289	325	401	423	412
15.5169	528	530	505	373	384	388	324	327	319	257	262	288	225	206	203	322	351	366	403	424	447
15.5415	516	549	489	371	409	386	344	317	327	272	262	283	201	183	196	326	315	323	391	399	368
15.5661	532	485	477	414	392	412	338	292	333	259	257	237	216	228	201	342	320	335	419	427	416
15.5907	484	509	475	349	394	423	324	316	333	257	268	279	219	212	184	344	329	331	417	422	405
15.6153	490	495	506	393	426	377	338	335	338	259	257	277	206	234	209	328	289	340	393	398	408
15.6399	513	501	498	387	434	389	318	310	316	304	268	262	229	234	234	326	345	323	416	434	378
15.6645	477	529	494	366	384	388	354	323	347	270	257	304	201	209	183	354	330	326	386	361	435
15.6891	503	495	483	399	406	392	364	322	344	263	291	254	232	222	222	361	339	304	402	430	414
15.7136	481	507	518	411	390	433	314	295	345	288	244	261	202	220	216	337	329	319	395	375	383
15.7382	486	513	522	392	354	386	344	344	336	277	258	278	227	232	234	357	338	328	373	425	388
15.7628	494	517	496	422	401	405	322	328	355	262	267	276	229	220	208	327	355	313	449	445	397
15.7874	473	493	486	411	398	374	365	309	314	285	259	251	207	223	225	311	313	391	366	402	429
15.812	498	466	462	435	406	381	315	320	316	262	260	248	236	215	221	311	312	328	442	398	382
15.8366	518	469	510	375	438	410	317	334	312	289	278	242	218	218	225	321	326	335	405	413	409
15.8612	499	523	507	416	421	371	316	306	309	281	262	279	217	216	217	320	317	313	396	437	413
15.8858	486	499	477	364	361	402	350	375	305	260	278	270	237	243	231	306	304	307	415	414	414
15.9104	521	546	478	420	383	378	301	356	337	280	248	252	237	209	241	341	310	343	424	388	424
15.935	464	483	494	400	435	374	344	313	325	268	270	250	205	225	239	362	331	318	405	448	378
15.9596	495	494	482	421	402	436	357	303	340	295	246	277	238	220	206	305	358	353	363	406	439
15.9841	481	454	480	397	405	414	303	347	316	275	259	319	230	210	209	332	338	327	392	392	402
16.0087	467	483	509	372	388	378	291	315	319	286	252	277	228	231	235	335	349	324	417	415	407
16.0333	504	543	530	390	364	398	351	329	337	282	254	267	204	214	245	328	286	349	428	444	397
16.0579	464	506	515	411	399	420	344	331	327	250	273	276	209	222	234	342	339	347	405	398	428
16.0825	530	461	465	417	416	376	352	334	328	276	304	274	236	242	226	334	315	350	429	424	426
16.1071	493	514	464	391	346	403	335	324	354	282	262	271	257	223	243	298	350	347	393	395	415
16.1317	528	519	505	390	425	420	355	337	312	266	305	284	226	249	233	293	345	335	407	384	423
16.1563	458	454	505	398	383	409	319	344	312	247	279	286	207	245	234	349	339	356	387	397	363
16.1809	473	454	483	414	385	396	307	349	338	297	276	274	247	218	230	360	315	335	398	420	445
16.2055	461	505	480	373	420	375	324	314	340	297	305	279	236	232	228	308	337	323	382	429	395
16.2301	492	473	515	419	436	415	336	367	343	270	280	271	210	213	228	345	316	344	391	394	413
16.2547	494	476	497	371	426	406	371	321	315	265	299	240	227	237	228	328	323	292	385	387	407
16.2792	476	484	496	399	377	445	327	341	346	279	252	303	238	211	223	317	326	341	418	410	434
16.3038	530	516	471	380	404	407	337	329	320	268	273	284	233	234	248	350	352	337	408	400	425
16.3284	517	458	496	405	407	401	312	321	317	269	296	277	276	232	245	333	336	333	429	423	420
16.353	484	459	517	435	418	369	339	312	308	260	284	268	235	227	267	309	351	352	426	410	424
16.3776	500	469	474	361	399	400	360	379	344	277	317	289	250	202	221	337	342	369	418	433	400
16.4022	468	460	506	383	372	392	346	322	363	284	263	312	238	244	261	309	347	351	425	386	408
16.4268	468	490	506	402	400	418	339	336	344	287	295	304	228	247	207	352	342	315	414	391	398
16.4514	476	441	470	399	398	415	310	321	340	277	293	260	226	223	202	328	346	331	388	407	377
16.476	482	481	493	415	398	431	369	311	332	274	287	285	240	252	217	318	348	354	421	439	427
16.5006	508	445	522	415	374	397	360	359	342	270	294	266	253	234	233	343	308	364	446	451	397
16.5252	462	488	473	397	403	427	328	360	352	286	266	274	241	220	246	322	304	349	393	434	397
16.5497	484	440	470	395	430	415	333	361	341	314	268	316	260	226	243	318	329	359	404	415	417
16.5743	463	503	483	385	395	368	341	315	362	274	300	288	238	225	228	302	331	347	416	397	405
16.5989	441	472	487	395	407	407	322	339	350	290	277	269	215	239	256	336	346	295	411	380	402
16.6235	492	473	482	400	401	401	359	363	345	282	279	268	217	229	236	338	330	339	419	385	382
16.6481	483	495	501	409	387	394	345	342	336	261	251	297	228	238	230	327	325	314	411	401	453
16.6727	490	498	495	395	373	391	358	330	306	295	293	311	279	239	233	328	344	359	399	386	394
16.6973	442	497	466	389	388	411	362	308	370	284	284	268	227	229	229	328	363	345	412	368	390
16.7219	477	473	431	408	388	412	361	307	374	291	269	288	233	230	248	356	322	331	430	377	427
16.7465	466	502	498	403	395	400	333	334	309	279	264	254	246	235	241	294	333	351	425	460	392
16.7711	484	463	472	381	395	395	357	305	354	251	292	272	237	250	253	346	348	340	441	390	383
16.7957	446	513	451	379	405	394	351	325	332	311	289	279	215	257	232	351	321	331	396	420	416
16.8202	494	491	455	362	394	412	345	329	333	283	289	317	238	228	259	372	335	359	383	375	384
16.8448	481	474	455	395	388	388	337	349	372	281	294	284	238	250	228	335	340	370	401	397	354
16.8694	466	432	480	416	433	428	326	312	344	270	306	269	253	251	231	312	303	319	390	376	395
16.894	467	510	478	383	401	377	372	349	345	294	283	253	249	237	245	301	341	319	400	395	405
16.9186	533	473	508	388	418	415	350	333	369	299	275	284	212	251	240	346	342	325	394	393	428
16.9432	426	470	492	384	366	389	337	354	338	310	290	268	253	236	258	349	328	347	370	397	392
16.9678	480	488	492	394	369	364	346	308	355	279	273	298	226	239	239	322	348	342	432	405	400
16.9924	464	462	465	350	356	398	344	304	295	300	302	270	246	214	263	348	339	343	400	379	373
17.017	470	452	445	402	379	389	364	327	321	268	307	315	247	217	238	315	336	323	378	395	383
17.0416	494	485	474	341	425	374	331	340	368	300	319	286	236	263	227	366	338	350	391	390	359
17.0662	409	477	431	394	408	412	348	320	329	267	284	308	262	210	230	308	330	320	372	362	411
17.0907	456	451	464	389	388	399	326	321	355	255	276	313	234	247	243	300	317	346	443	392	387
17.1153	442	430	467	402	370	390	335	327	327	273	303	276	239	252	223	341	322	312	402	396	405
17.1399	456	442	437	370	397	406	319	330	292	288	297	304	215	211	227	355	314	317	379	389	444
17.1645	464	524	435	351	355	387	340	358	378	279	279	308	236	228	244	316	320	295	369	395	377
17.1891	445	485	452	354	371	379	337	355	326	265	295	293	258	253	250	323	322	302	386	365	390
17.2137	457	447	453	398	345	393	334	281	336	277	297	287	213	232	291	339	287	326	386	401	372
17.2383	453	456	450	392	413	393	343	340	332	280	275	272	228	234	269	334	339	336	395	372	365
17.2629	468	455	461	369	345	406	320	348	346	249	250	295	269	251	242	333	333	302	382	374	363
17.2875	425	434	463	384	386	377	341	302	336	282	299	273	248	265	235	349	317	316	367	374	394
17.3121	422	436	419	428	387	392	334	322	335	287	293	260	241	243	236	337	322	312	385	427	363
17.3367	415	432	418	386	391	379	342	324	306	290	285	277	233	262	234	294	369	307	375	374	361
17.3612	512	450	430	349	357	359	354	335	346	273	291	275	236	264	228	328	330	331	397	392	372
17.3858	435	386	435	376	352	422	322	343	306	283	280	267	251	227	217	311	333	317	378	380	370
17.4104	418	447	443	356	355	398	357	319	329	272	314	307	230	257	240	320	334	320	364	392	401
17.435	444	405	407	335	384	338	324	301	294	267	277	258	239	221	229	343	359	334	372	391	373
17.4596	425	425	447	403	347	397	331	317	340	301	288	281	216	271	230	303	306	281	380	435	376
17.4842	469	411	426	378	382	356	325	310	349	263	290	293	230	249	236	317	302	309	383	394	361
17.5088	417	487	403	337	386	370	309	332	319	296	270	263	221	225	222	314	320	335	378	367	358
17.5334	442	417	416	370	377	402	351	392	301	267	243	256	223	264	245	292	310	342	330	371	379
17.558	429	417	443	385	360	357	321	306	329	288	295	274	244	217	241	319	337	334	351	390	387
17.5826	412	394	419	389	365	372	323	307	303	270	247	300	236	249	207	329	330	354	352	380	359
17.6072	419	424	455	335	382	374	296	315	330	289	298	289	232	254	242	326	311	327	365	383	387
17.6317	453	427	421	365	345	393	303	341	337	288	285	258	266	227	217	285	313	300	345	382	368
17.6563	375	400	420	356	356	355	295	301	323	313	296	268	234	228	256	313	276	350	369	367	351
17.6809	455	420	421	351	374	359	318	276	319	259	270	279	260	223	222	296	300	316	351	313	393
17.7055	396	416	416	365	335	372	310	315	321	271	254	246	237	206	239	307	336	323	422	388	347
17.7301	413	402	399	322	385	369	320	314	337	260	269	292	242	262	244	311	316	309	370	344	377
17.7547	413	435	489	366	360	352	302	309	296	242	281	275	235	236	206	280	360	307	384	362	354
17.7793	403	481	418	334	361	354	312	299	315	252	258	283	217	217	229	301	312	294	393	361	352
17.8039	389	423	393	351	341	377	320	311	299	251	273	252	202	228	256	319	337	327	366	366	345
17.8285	422	428	431	397	373	333	292	336	336	253	296	270	238	225	239	304	302	329	379	341	392
17.8531	405	436	400	340	360	328	319	305	322	258	261	248	233	215	242	306	309	315	336	372	376
17.8777	409	422	379	357	337	370	307	318	317	271	260	291	228	197	239	307	337	342	367	368	337
17.9022	392	394	396	345	334	375	331	305	293	265	256	290	205	222	224	330	293	294	364	346	381
17.9268	375	432	420	365	338	334	295	318	307	257	233	261	232	233	215	338	287	292	332	338	379
17.9514	429	409	406	371	366	344	303	305	323	264	263	268	232	227	236	326	296	318	361	338	353
17.976	413	454	381	409	339	320	300	297	304	262	253	301	200	237	243	312	322	324	347	334	352
18.0006	428	387	407	338	347	363	257	306	278	275	263	259	219	211	227	307	287	315	327	342	330
18.0252	385	402	372	296	328	330	332	305	306	262	280	289	236	230	232	291	277	290	360	336	369
18.0498	373	423	398	365	341	356	283	313	283	258	257	259	202	224	247	300	305	309	327	345	341
18.0744	413	380	418	316	354	329	291	272	294	245	263	267	217	221	234	285	262	313	356	364	305
18.099	411	375	393	358	365	325	302	294	312	266	252	248	220	213	212	276	279	305	337	334	335
18.1236	433	378	417	326	327	323	298	307	312	252	234	256	250	208	229	316	302	288	343	361	331
18.1482	363	385	404	356	349	337	294	285	291	298	260	259	232	194	221	329	290	285	336	332	321
18.1727	368	361	408	284	334	327	285	290	280	242	277	279	236	217	203	310	313	312	336	354	347
18.1973	389	398	410	346	347	326	279	316	308	267	283	228	218	194	215	298	293	278	340	309	320
18.2219	405	367	390	323	342	325	302	299	283	268	268	243	228	235	239	334	283	292	343	335	354
18.2465	382	366	391	325	326	325	286	304	298	273	255	247	233	210	211	311	311	291	339	329	340
18.2711	397	337	358	311	356	336	272	265	293	240	265	280	236	230	233	299	292	288	333	318	337
18.2957	410	376	375	347	389	323	281	292	299	269	259	256	236	218	210	281	297	319	306	324	312
18.3203	377	401	377	347	339	322	304	262	295	255	247	246	213	222	192	286	274	277	328	320	342
18.3449	373	392	388	326	336	326	290	294	279	250	278	243	225	220	231	292	313	288	363	315	359
18.3695	332	398	383	357	323	337	286	279	268	216	246	266	187	218	236	258	303	323	325	322	298
18.3941	390	364	371	298	358	326	259	307	262	234	242	270	226	223	194	308	282	259	330	317	326
18.4187	356	396	391	305	305	322	281	253	289	242	221	265	216	213	212	265	273	293	330	322	303
18.4432	351	366	375	340	348	345	292	267	304	255	243	244	235	231	209	291	296	310	310	305	313
18.4678	324	367	386	358	321	333	315	304	303	251	228	239	235	214	216	300	276	280	324	293	292
18.4924	398	349	356	306	362	309	296	315	334	228	254	255	221	227	194	255	284	273	324	328	339
18.517	329	348	356	339	333	348	242	284	249	270	251	269	217	223	222	255	319	269	341	343	307
18.5416	336	345	385	356	318	306	286	271	306	228	244	251	216	207	191	300	280	321	296	277	293
18.5662	360	377	371	305	295	334	281	290	274	249	225	245	221	228	216	284	272	261	321	311	320
18.5908	359	366	346	294	302	305	310	268	273	225	248	271	224	220	227	265	261	309	325	334	314
18.6154	327	363	347	297	311	332	295	277	253	249	230	269	214	228	194	292	298	263	297	288	309
18.64	385	325	338	312	299	314	274	248	248	253	255	267	188	189	221	226	292	236	293	303	322
18.6646	344	352	333	318	341	315	287	284	279	241	247	228	223	229	218	285	233	302	314	315	322
18.6892	356	338	346	302	325	295	258	274	312	233	237	236	210	193	218	256	240	273	310	300	310
18.7138	377	318	374	308	309	313	315	240	282	249	225	218	195	237	212	253	295	285	319	278	314
18.7383	309	328	336	305	276	273	301	259	291	233	239	222	207	222	196	298	292	257	314	293	305
18.7629	313	335	368	308	301	329	245	284	291	215	234	250	215	200	214	256	285	239	317	297	274
18.7875	367	310	347	279	295	288	245	251	276	231	216	226	213	190	186	256	290	282	297	295	307
18.8121	319	341	345	296	307	320	235	265	274	209	239	230	221	218	214	235	274	285	297	306	332
18.8367	313	337	357	262	293	302	256	249	288	224	222	221	178	202	204	258	274	265	311	295	283
18.8613	327	366	354	313	303	292	279	278	251	262	227	236	236	209	206	290	251	288	289	305	328
18.8859	333	365	337	286	322	328	243	272	268	212	249	241	203	220	203	286	271	265	307	292	292
18.9105	318	313	326	337	287	296	254	275	236	215	230	213	227	211	194	297	246	270	308	293	294
18.9351	347	311	365	285	295	271	252	274	245	246	224	226	205	191	185	276	250	257	307	290	284
18.9597	360	315	337	283	250	262	247	260	250	227	219	208	210	202	215	270	249	242	255	297	251
18.9843	341	329	330	288	275	274	237	248	243	258	197	232	213	210	221	263	249	241	277	287	281
19.0088	336	329	306	267	287	297	278	237	246	223	201	248	186	186	204	228	289	261	274	254	307
19.0334	356	345	297	270	316	267	240	280	263	243	257	232	190	199	203	244	253	283	286	282	262
19.058	346	298	325	287	290	297	273	243	276	215	264	219	188	211	228	270	242	270	269	292	273
19.0826	325	336	308	277	296	285	267	241	267	229	219	224	213	177	208	264	223	235	297	277	280
19.1072	351	285	317	269	273	280	261	255	268	213	231	230	207	187	198	272	272	266	276	277	278
19.1318	295	328	348	279	270	267	254	250	252	232	226	209	218	189	192	259	249	246	278	292	262
19.1564	316	308	284	274	315	280	208	273	235	227	217	241	195	190	218	226	254	242	286	277	284
19.181	298	282	306	295	268	278	246	219	238	223	232	197	195	194	179	222	247	254	275	243	273
19.2056	310	344	302	284	263	261	250	261	274	218	208	225	201	195	171	250	253	257	287	276	288
19.2302	296	300	300	278	263	292	251	204	247	191	231	193	188	197	208	214	232	272	265	246	294
19.2548	350	297	302	283	253	274	264	221	241	209	221	211	196	189	194	236	266	217	242	243	262
19.2793	312	286	299	282	259	296	247	253	245	228	207	204	180	170	195	246	251	266	246	313	275
19.3039	316	329	336	249	284	288	255	247	218	206	214	220	189	198	188	228	216	229	287	293	269
19.3285	305	299	279	263	254	269	228	234	214	230	230	204	183	171	185	219	238	243	263	246	252
19.3531	287	314	328	270	260	249	241	210	223	221	206	206	178	204	207	225	230	232	277	293	254
19.3777	299	321	305	270	289	292	238	225	217	192	207	211	167	187	182	223	235	205	255	272	295
19.4023	318	299	333	281	272	242	227	228	223	199	214	201	174	198	183	217	246	233	252	291	258
19.4269	296	311	286	243	261	242	237	265	230	197	213	220	181	191	199	253	223	225	269	263	253
19.4515	297	277	321	242	262	265	227	221	254	214	184	199	192	183	169	229	229	238	285	238	277
19.4761	305	259	286	254	244	255	233	228	236	195	215	245	199	190	183	239	233	225	236	235	251
19.5007	261	282	287	281	258	235	222	246	237	196	197	185	158	176	160	265	207	255	251	258	266
19.5253	292	305	292	268	268	241	228	245	229	215	229	211	195	205	227	244	228	229	234	296	235
19.5498	278	261	274	272	236	276	217	236	239	195	189	200	195	182	208	242	225	250	250	266	253
19.5744	260	317	282	239	235	224	250	219	240	197	191	188	176	201	152	203	193	222	252	240	250
19.599	289	270	305	249	256	248	225	221	228	211	220	208	177	177	192	209	249	214	258	275	233
19.6236	255	319	275	261	238	257	223	230	217	190	210	202	176	174	171	227	231	227	261	244	226
19.6482	266	272	273	237	245	224	208	218	247	193	187	201	206	200	167	228	226	218	230	263	249
19.6728	291	285	261	239	247	256	214	244	254	204	205	194	182	179	183	230	219	238	260	260	275
19.6974	317	267	266	254	239	221	218	228	222	178	224	173	189	173	149	223	191	230	248	258	247
19.722	269	278	294	244	242	222	217	184	204	182	191	197	186	174	191	242	225	233	252	227	275
19.7466	257	305	286	238	238	232	198	226	220	188	211	186	177	179	170	211	252	227	257	219	278
19.7712	262	286	261	223	219	223	226	208	216	195	189	169	183	187	176	211	219	208	233	260	224
19.7958	277	261	270	259	258	209	209	211	206	185	193	179	164	150	148	206	209	188	226	223	243
19.8203	266	256	267	204	254	221	230	229	200	213	195	167	179	196	174	211	196	230	234	242	242
19.8449	267	269	275	217	235	217	175	191	203	189	199	189	161	148	156	213	230	204	217	235	220
19.8695	245	314	272	232	233	230	225	212	213	195	189	182	181	179	180	191	192	194	272	232	248
19.8941	247	276	253	247	229	228	215	208	208	207	164	174	161	148	166	223	199	197	218	229	214
19.9187	263	285	248	221	222	239	198	191	193	212	197	179	168	162	170	225	207	198	223	228	220
19.9433	259	274	240	196	216	218	227	218	243	198	181	203	162	164	174	179	168	206	222	210	221
19.9679	257	243	228	219	219	225	195	217	212	175	208	195	186	145	167	215	211	203	225	222	206
19.9925	250	261	246	235	235	211	178	203	189	191	194	192	172	168	178	192	202	210	229	243	218
20.0171	228	279	230	218	219	212	204	182	206	182	199	169	147	160	150	206	185	214	213	199	228
20.0417	257	271	231	221	200	268	218	173	199	194	211	173	166	170	183	226	212	205	224	253	209
20.0663	255	226	256	210	226	249	188	214	220	164	179	195	181	156	151	206	221	188	238	195	230
20.0908	229	255	261	194	240	199	195	219	206	199	175	167	164	170	207	173	227	219	184	225	220
20.1154	233	249	232	250	224	220	199	197	225	181	210	189	189	158	140	194	176	193	239	183	199
20.14	247	279	203	208	195	213	202	201	221	185	165	146	176	154	166	186	195	206	204	202	192
20.1646	230	234	222	236	238	214	205	182	220	195	175	173	140	151	141	191	204	205	201	222	215
20.1892	239	249	244	211	220	194	185	194	197	166	172	167	151	159	163	211	197	214	214	204	224
20.2138	232	234	210	232	184	215	201	208	210	161	169	194	160	156	169	202	173	172	220	232	218
20.2384	243	240	238	219	199	202	194	194	214	187	167	159	175	147	135	198	190	203	195	226	196
20.263	216	247	232	161	190	220	201	199	189	172	161	168	150	157	158	177	197	190	237	194	190
20.2876	221	216	220	187	207	221	168	178	181	165	174	170	145	180	158	169	189	179	211	187	206
20.3122	242	247	243	195	199	233	215	218	184	155	196	164	132	159	166	189	194	188	220	182	210
20.3368	224	242	214	203	188	212	211	172	203	180	137	188	161	162	185	199	187	170	207	207	198
20.3613	234	239	211	189	197	189	194	178	171	166	164	194	149	159	142	180	177	186	232	177	208
20.3859	237	233	233	197	181	227	175	190	177	185	168	176	132	132	149	177	155	203	214	180	201
20.4105	217	220	253	230	203	211	181	184	195	179	169	156	142	136	159	198	168	200	192	200	208
20.4351	221	224	206	203	222	215	165	190	194	167	195	159	149	141	141	174	196	181	187	178	199
20.4597	220	209	243	219	225	171	177	183	183	191	137	175	153	160	144	184	173	180	178	187	214
20.4843	237	255	217	184	233	195	198	167	179	146	165	152	141	162	160	173	183	178	221	177	192
20.5089	255	205	240	184	197	188	181	192	181	172	157	177	141	144	167	186	173	204	221	212	203
20.5335	218	206	234	213	195	179	183	174	168	165	167	157	146	165	152	163	186	172	216	202	198
20.5581	218	213	186	199	196	196	162	192	149	144	166	156	140	124	144	200	182	163	221	196	192
20.5827	212	228	239	185	195	191	169	169	180	154	150	160	134	126	155	165	161	177	203	170	208
20.6073	200	211	211	190	203	212	159	181	194	140	145	169	169	155	130	177	175	191	193	179	183
20.6318	227	222	206	177	179	188	165	178	186	141	159	184	143	138	143	168	174	184	195	196	204
20.6564	186	240	196	208	175	196	187	148	157	138	142	154	159	135	147	150	174	189	204	188	174
20.681	220	194	206	167	189	206	166	162	187	145	177	130	134	146	149	164	180	206	195	195	199
20.7056	212	217	213	173	225	167	200	175	158	143	163	171	145	140	111	161	171	176	208	207	178
20.7302	213	206	232	185	187	205	139	182	187	155	162	149	113	128	140	153	165	163	184	177	201
20.7548	216	208	208	165	174	172	165	159	177	149	158	161	151	127	127	151	173	169	178	168	182
20.7794	198	224	177	207	160	204	169	181	173	159	154	137	141	140	112	157	172	159	166	177	187
20.804	216	227	228	177	170	181	153	164	176	147	164	135	139	149	131	171	177	165	179	198	192
20.8286	209	202	218	173	186	176	147	148	160	154	138	133	128	143	135	166	171	166	190	177	161
20.8532	200	218	188	169	170	193	170	166	166	162	170	139	144	146	129	152	156	173	181	173	164
20.8778	203	219	185	199	155	163	165	160	154	145	156	149	155	125	142	180	169	159	187	163	162
20.9023	204	215	211	186	172	181	164	152	160	167	129	133	124	141	139	156	148	162	174	171	196
20.9269	213	200	187	179	187	170	143	154	165	148	133	128	131	114	127	165	176	170	176	172	164
20.9515	196	206	194	149	161	169	177	179	163	144	132	140	144	152	136	158	154	167	185	166	176
20.9761	195	220	189	165	170	169	147	149	166	147	131	140	139	144	130	162	161	161	185	166	164
21.0007	190	214	200	170	157	180	154	140	154	155	146	112	119	127	127	177	143	144	185	162	148
21.0253	221	198	199	169	176	158	174	150	173	119	153	127	115	122	118	153	159	162	161	192	154
21.0499	186	192	208	158	172	162	155	155	155	138	132	154	129	148	114	140	141	159	157	145	170
21.0745	180	201	206	178	187	179	160	156	168	133	150	149	119	132	106	178	167	139	137	165	154
21.0991	191	198	197	155	172	187	154	136	154	135	151	133	123	125	145	155	141	165	160	165	161
21.1237	163	186	203	163	156	162	133	143	142	115	120	129	133	134	139	168	157	153	172	171	172
21.1483	200	180	196	143	149	175	142	149	144	165	135	146	125	137	102	136	156	150	180	153	173
21.1729	188	183	187	162	156	161	143	156	157	134	150	146	109	124	128	160	130	135	170	198	143
21.1974	165	197	182	158	154	156	158	147	130	143	129	133	127	106	114	145	124	125	153	152	189
21.222	169	177	196	147	170	155	153	144	149	143	144	125	131	115	125	155	162	162	168	136	143
21.2466	194	194	169	142	139	174	139	142	166	140	129	128	128	133	109	129	153	130	169	166	142
21.2712	156	166	180	177	158	148	153	144	146	139	146	145	135	138	107	145	159	145	159	177	192
21.2958	199	200	178	171	148	154	153	144	156	128	122	141	114	124	100	156	157	142	161	177	142
21.3204	145	183	180	145	160	138	133	139	145	111	113	146	110	131	111	134	161	160	148	144	140
21.345	199	205	162	137	151	165	153	131	132	120	122	126	126	120	125	139	143	127	144	152	161
21.3696	181	154	173	140	140	149	131	148	142	126	130	118	109	126	100	140	151	127	148	162	158
21.3942	163	189	149	171	144	141	131	130	138	108	102	155	105	126	121	149	154	133	164	168	138
21.4188	146	178	185	174	157	169	127	109	146	123	121	116	109	102	118	129	151	125	142	159	153
21.4434	157	169	161	163	153	156	135	149	125	123	132	126	99	117	126	126	132	130	146	163	149
21.4679	149	159	189	145	143	147	117	111	141	141	146	137	107	115	107	121	145	133	132	158	154
21.4925	171	166	190	138	137	123	139	133	140	113	125	120	108	103	118	140	111	148	167	159	138
21.5171	183	178	179	161	162	144	163	122	140	118	125	121	118	105	112	111	140	151	132	154	150
21.5417	190	150	149	145	143	144	131	146	129	119	106	117	112	100	105	143	126	139	144	154	164
21.5663	150	176	156	142	126	148	121	136	131	119	120	123	103	123	109	140	121	116	141	136	135
21.5909	174	171	147	149	142	136	129	138	125	138	143	106	117	107	114	137	120	135	152	134	145
21.6155	172	136	172	147	131	125	126	132	141	117	137	115	105	106	96	137	108	140	155	142	141
21.6401	153	149	170	154	146	136	128	114	122	125	125	114	125	106	124	142	121	123	145	126	169
21.6647	173	167	164	143	136	125	123	124	142	112	117	105	128	103	111	123	126	137	128	139	131
21.6893	146	154	163	155	140	104	137	126	115	115	123	116	102	104	98	140	145	147	144	112	151
21.7139	163	155	164	158	134	136	119	133	125	109	113	109	103	108	93	119	115	117	126	150	129
21.7384	174	171	155	138	141	126	124	121	109	136	87	101	109	99	92	130	114	121	157	141	129
21.763	145	180	149	128	132	133	110	129	129	110	128	120	116	100	94	107	117	112	143	123	144
21.7876	141	168	158	136	148	112	133	118	126	109	122	127	96	121	103	120	112	109	141	155	137
21.8122	151	165	156	140	131	112	106	120	118	120	101	116	87	118	104	137	117	119	115	119	126
21.8368	149	162	162	131	140	119	104	104	123	123	123	113	105	116	101	112	135	127	139	135	147
21.8614	147	170	149	139	155	130	130	115	120	109	108	106	103	103	98	138	128	121	117	139	122
21.886	160	173	150	133	137	108	132	138	105	121	117	111	106	90	102	133	123	114	145	137	149
21.9106	166	146	135	141	95	135	98	132	112	108	118	103	109	99	106	121	124	124	120	111	129
21.9352	143	142	165	139	142	136	108	121	112	99	114	102	104	108	96	136	109	121	133	116	129
21.9598	141	157	157	113	126	130	116	116	119	129	97	106	98	105	98	140	114	138	123	116	116
21.9844	143	168	161	116	136	140	128	120	105	99	91	109	95	97	114	109	117	118	101	118	122
22.0089	155	144	145	136	136	122	106	107	119	116	109	105	109	83	109	113	117	117	123	123	119
22.0335	145	155	141	128	115	117	106	133	124	112	102	102	113	96	109	101	109	109	128	140	125
22.0581	143	148	136	110	111	117	117	105	125	98	108	94	108	91	90	98	95	120	130	135	117
22.0827	146	125	128	117	120	140	111	121	122	85	105	111	113	103	87	117	90	128	120	112	123
22.1073	153	158	152	129	133	125	114	109	98	110	105	97	88	123	89	116	122	111	118	122	115
22.1319	169	135	172	110	99	127	122	103	92	98	96	112	98	86	101	121	132	94	134	136	124
22.1565	125	141	145	117	125	130	141	114	129	105	121	105	84	111	95	120	118	120	117	122	127
22.1811	121	145	142	132	118	125	103	94	98	108	89	103	111	98	102	95	97	112	124	132	101
22.2057	140	125	110	127	120	125	105	95	124	92	111	99	81	93	83	112	113	129	128	146	100
22.2303	146	117	133	119	120	109	123	108	103	98	101	99	94	86	92	103	107	119	108	124	116
22.2549	143	154	137	117	113	113	127	117	125	99	96	96	101	93	109	109	102	117	120	110	130
22.2794	132	116	120	114	113	109	105	136	89	86	95	88	73	91	101	94	89	116	133	107	103
22.304	143	143	138	117	114	117	94	95	98	102	106	90	100	90	82	116	87	113	102	106	125
22.3286	130	131	138	132	110	127	93	116	107	104	90	98	85	72	76	101	104	111	145	117	121
22.3532	135	131	131	122	111	127	86	101	101	105	117	115	79	99	92	108	92	101	100	105	115
22.3778	113	144	149	133	99	101	110	96	102	93	97	75	75	91	100	108	106	116	107	98	121
22.4024	144	116	120	103	115	115	87	93	115	69	71	82	95	89	95	112	90	97	106	131	117
22.427	122	116	142	119	110	125	116	113	97	97	75	79	91	80	87	121	102	110	115	121	118
22.4516	131	105	129	118	94	113	100	93	88	88	80	97	90	91	95	87	96	78	108	123	102
22.4762	139	125	112	108	120	111	95	86	101	83	90	83	85	85	84	83	95	100	115	107	111
22.5008	142	131	142	104	122	105	99	87	96	98	99	97	96	84	82	105	107	102	116	112	115
22.5254	113	137	146	101	90	94	85	84	79	87	84	91	70	72	88	89	105	102	104	104	109
22.5499	113	118	109	103	91	117	93	93	97	76	72	86	93	84	91	96	82	105	82	98	116
22.5745	106	112	117	123	114	100	100	90	99	88	107	82	72	88	90	87	87	123	109	96	111
22.5991	114	125	109	105	88	118	87	90	100	73	92	81	69	70	81	98	112	102	98	108	85
22.6237	118	122	128	115	110	97	90	102	105	79	81	100	73	86	73	81	90	102	115	100	116
22.6483	135	127	126	102	126	122	90	79	107	85	100	89	86	79	70	99	87	103	95	112	102
22.6729	136	139	132	107	129	107	109	104	107	93	100	79	89	92	101	107	95	90	105	98	90
22.6975	118	115	116	95	105	111	91	109	96	61	93	77	77	85	90	90	87	96	108	105	115
22.7221	117	121	102	104	85	98	84	108	97	93	78	81	84	85	85	93	91	106	113	107	95
22.7467	125	125	131	104	123	109	90	89	89	92	92	96	72	65	78	106	89	87	105	100	107
22.7713	122	116	122	87	113	94	92	81	98	71	91	82	80	76	61	99	86	91	106	102	96
22.7959	121	119	122	94	90	94	75	102	88	77	72	77	73	75	75	91	87	92	101	104	101
22.8204	123	119	106	101	89	86	83	108	101	80	96	82	69	76	65	93	88	90	108	103	103
22.845	114	101	94	93	97	103	82	85	84	64	89	87	71	64	85	95	83	101	91	91	91
22.8696	115	128	114	104	86	103	71	86	81	80	86	98	65	81	63	96	85	81	91	102	88
22.8942	108	102	121	95	89	86	81	93	90	84	89	75	65	58	75	93	77	81	94	101	104
22.9188	118	118	96	94	102	110	91	83	87	87	71	84	65	91	53	78	82	88	99	77	82
22.9434	117	128	103	88	102	91	81	86	81	63	82	80	59	82	65	90	82	100	100	105	100
22.968	93	103	115	86	107	113	101	82	74	69	85	84	71	84	62	72	96	85	97	93	112
22.9926	109	121	135	91	100	94	88	70	82	65	84	63	74	70	68	77	111	95	107	89	97
23.0172	121	103	116	83	89	80	85	65	89	72	71	75	63	75	68	88	71	98	100	80	80
23.0418	129	124	118	87	103	84	91	69	95	86	100	64	73	80	87	94	104	88	92	92	87
23.0664	102	137	113	93	93	84	79	84	78	69	54	91	67	64	77	92	85	75	78	82	99
23.0909	104	98	104	78	88	84	85	72	84	80	83	78	77	65	72	82	87	79	101	88	70
23.1155	125	104	119	99	98	115	80	85	75	74	76	49	85	65	91	71	70	91	100	92	80
23.1401	103	102	104	82	105	89	71	88	70	71	70	73	76	66	73	84	78	82	87	89	83
23.1647	110	122	97	94	95	79	83	89	82	85	86	73	73	66	71	68	80	96	90	89	77
23.1893	118	110	107	71	83	93	66	76	65	68	78	70	62	77	66	82	86	72	82	88	77
23.2139	81	98	114	78	63	94	82	73	102	72	76	84	65	62	66	74	66	73	91	69	77
23.2385	100	108	108	77	80	97	80	71	74	68	61	82	75	68	58	83	74	62	101	88	83
23.2631	92	94	99	102	87	103	79	100	65	67	78	71	69	66	66	83	88	73	80	94	94
23.2877	111	109	96	94	79	78	68	81	87	71	73	76	73	68	69	92	84	75	86	75	77
23.3123	110	103	92	77	80	76	73	56	73	68	86	61	76	55	68	66	67	73	97	90	79
23.3369	123	75	96	74	76	78	67	85	84	57	67	70	74	57	50	67	93	56	86	100	93
23.3615	94	102	122	105	75	78	87	62	82	79	70	68	68	68	65	77	68	80	98	81	83
23.386	112	97	113	84	91	85	75	81	77	69	74	69	58	75	55	81	84	76	90	70	94
23.4106	98	110	108	99	78	86	77	90	80	73	58	66	47	69	64	57	86	61	90	89	89
23.4352	97	94	110	68	97	91	77	79	79	57	78	78	64	66	50	78	76	69	94	79	73
23.4598	95	103	97	89	80	86	68	66	74	63	77	78	56	55	60	79	68	66	71	85	83
23.4844	77	101	109	75	100	91	77	77	80	74	59	59	55	60	57	71	72	70	80	85	77
23.509	92	90	100	99	91	81	79	70	85	49	68	62	51	51	53	82	66	65	80	64	79
23.5336	72	101	109	77	67	80	67	65	75	65	55	66	75	58	58	72	51	73	84	79	70
23.5582	95	106	94	88	77	73	63	83	67	61	52	48	59	61	53	81	66	67	71	80	75
23.5828	96	89	95	70	78	85	77	80	73	64	53	58	61	64	54	61	81	64	75	78	82
23.6074	89	80	97	72	65	77	70	77	59	74	53	54	56	68	60	66	61	78	71	80	91
23.632	119	109	95	64	80	74	56	70	64	68	47	58	56	62	42	78	66	63	95	91	81
23.6565	101	93	82	69	82	82	70	70	69	73	57	76	54	67	47	71	69	67	70	70	68
23.6811	91	99	114	75	68	73	55	74	67	45	57	75	52	62	47	74	69	59	84	55	71
23.7057	74	94	97	76	71	69	60	67	61	57	64	62	55	56	45	75	70	71	63	82	68
23.7303	86	84	96	76	69	67	69	64	68	62	51	51	50	43	64	65	76	68	87	82	77
23.7549	101	91	95	97	75	73	60	55	55	67	44	55	57	52	65	72	60	66	70	77	62
23.7795	93	82	92	79	80	81	67	65	71	61	59	60	55	41	49	63	58	74	72	77	70
23.8041	91	101	85	77	74	85	73	65	60	53	60	73	58	58	60	62	74	68	75	68	64
23.8287	108	79	95	73	72	77	69	61	74	52	83	56	50	52	46	68	50	54	68	86	85
23.8533	92	89	98	86	70	76	55	63	64	64	49	62	63	50	57	59	56	78	66	72	72
23.8779	81	91	107	80	61	67	82	66	51	62	48	57	51	54	48	72	55	70	81	66	68
23.9025	96	80	89	79	72	64	74	76	71	54	61	48	44	50	49	64	61	59	72	77	79
23.927	97	77	80	58	82	59	51	67	69	50	54	45	55	59	48	81	73	72	71	58	59
23.9516	85	88	84	71	68	78	58	67	64	60	58	53	44	51	65	52	71	62	64	81	69
23.9762	76	88	87	69	66	59	66	55	50	55	51	62	47	56	62	72	55	72	71	74	78
24.0008	73	73	70	61	80	67	52	55	72	54	58	56	27	50	47	61	68	55	51	75	64
24.0254	96	80	86	79	76	71	55	52	70	42	61	52	47	55	52	60	80	59	81	75	56
24.05	81	97	87	65	75	64	61	62	51	51	51	49	50	53	53	70	64	64	77	77	62
24.0746	65	71	103	84	73	47	58	57	79	58	52	51	50	48	43	72	64	74	73	62	64
24.0992	80	78	95	71	59	72	53	59	53	48	52	43	54	53	59	63	62	52	73	65	65
24.1238	65	85	81	60	71	68	55	57	58	63	43	42	49	62	54	62	60	61	60	61	67
24.1484	80	94	91	51	69	73	72	62	60	48	64	51	42	54	38	60	66	61	62	68	63
24.173	79	82	81	66	62	67	59	45	59	69	47	46	46	26	46	64	53	48	55	83	71
24.1975	95	78	73	60	80	62	48	71	57	55	49	56	43	50	49	64	57	62	59	53	71
24.2221	69	88	82	70	59	82	61	59	65	51	54	56	54	39	36	58	58	53	65	54	84
24.2467	72	102	68	79	56	70	71	66	68	44	54	47	47	61	49	62	55	57	62	48	57
24.2713	80	89	85	73	74	71	61	61	75	61	50	46	45	59	40	64	63	62	63	61	58
24.2959	67	76	73	56	58	64	48	51	58	40	51	71	52	34	52	64	48	62	64	69	67
24.3205	74	75	81	58	59	60	59	49	48	41	41	49	58	45	42	51	47	40	65	59	62
24.3451	68	82	86	64	56	58	47	47	66	56	58	47	53	58	34	62	58	44	80	77	69
24.3697	82	81	73	55	76	68	55	64	69	62	42	53	45	36	60	56	62	53	74	57	62
24.3943	86	85	73	68	63	76	44	67	47	52	43	51	47	59	54	48	58	54	60	62	58
24.4189	76	82	83	66	75	68	48	53	68	42	44	51	46	38	57	42	50	59	52	70	65
24.4435	75	85	77	55	49	63	63	66	48	44	52	39	43	47	49	70	63	64	65	53	61
24.468	62	68	87	67	57	68	55	49	66	64	51	43	50	45	48	65	47	61	55	72	54
24.4926	76	68	63	46	60	61	51	44	50	41	41	35	39	41	41	49	51	44	71	66	67
24.5172	69	80	84	73	57	60	58	51	51	46	57	49	50	55	38	61	57	56	57	57	52
24.5418	82	80	87	66	66	67	56	54	61	52	32	33	35	53	37	49	52	63	50	63	53
24.5664	71	76	67	66	55	60	51	48	50	49	35	44	38	42	46	55	52	55	56	64	77
24.591	53	67	66	71	63	57	49	60	47	40	46	45	29	35	43	49	58	59	73	56	53
24.6156	70	80	70	71	56	60	44	55	42	46	41	39	48	37	45	60	53	49	54	65	56
24.6402	74	80	82	52	62	53	52	50	73	41	38	38	44	38	44	47	63	42	64	57	52
24.6648	60	63	72	59	58	60	57	52	55	42	44	34	47	45	45	49	49	46	53	57	51
24.6894	71	68	69	65	55	59	58	53	58	39	43	63	45	36	38	47	53	53	70	39	64
24.714	72	79	75	61	60	57	47	56	48	53	41	37	46	34	39	58	50	54	50	49	58
24.7385	61	71	82	53	65	44	42	59	56	50	43	47	35	48	50	49	40	63	32	58	60
24.7631	69	74	56	67	48	56	44	49	31	47	40	27	54	57	37	55	47	43	45	56	60
24.7877	69	76	70	54	52	51	49	45	43	37	41	43	36	47	30	54	53	54	61	61	50
24.8123	58	61	69	43	59	46	66	60	49	43	44	36	39	43	40	43	47	58	53	51	65
24.8369	78	65	72	43	44	61	47	49	51	54	46	39	32	43	45	52	52	53	50	46	58
24.8615	64	73	62	47	50	57	38	38	42	44	48	37	45	32	28	55	47	47	63	43	54
24.8861	61	79	71	60	49	55	51	50	38	39	40	40	47	40	29	43	44	58	59	62	50
24.9107	51	67	65	53	66	54	46	54	39	43	53	37	44	34	34	53	38	43	52	55	60
24.9353	70	76	61	46	56	64	43	50	56	34	51	29	28	46	39	44	41	49	67	67	59
24.9599	71	75	71	60	61	51	40	41	30	49	39	42	43	46	35	43	37	41	54	49	64
24.9845	63	81	62	60	47	60	37	46	48	33	45	45	33	39	38	38	44	49	53	51	45
25.009	73	76	68	39	52	61	43	43	33	37	34	35	37	47	31	61	44	54	54	56	59
25.0336	63	75	74	47	61	54	43	44	42	47	52	38	37	32	37	48	54	58	65	59	54
25.0582	67	67	65	48	45	49	49	33	46	40	41	37	37	28	39	39	38	47	51	50	50
25.0828	61	61	59	51	49	42	44	40	34	48	40	29	42	35	35	30	50	52	53	50	49
25.1074	58	72	69	52	61	51	46	42	52	43	35	27	36	33	36	35	53	44	50	61	57
25.132	63	58	62	47	53	59	40	46	34	47	44	41	35	34	42	41	42	40	51	52	42
25.1566	66	76	76	43	40	69	41	39	39	40	29	43	32	29	34	55	41	54	40	52	48
25.1812	66	63	53	34	50	48	43	42	47	33	35	33	22	42	41	40	43	48	49	45	53
25.2058	66	74	56	46	58	51	45	42	33	36	41	43	36	30	36	49	36	43	54	58	46
25.2304	56	58	65	45	55	41	44	40	39	29	37	24	29	28	35	55	29	35	45	54	61
25.255	74	60	66	42	49	47	54	52	44	34	42	36	34	30	30	37	37	53	58	39	44
25.2795	65	67	59	45	44	44	53	40	53	39	31	33	30	34	31	42	31	36	36	41	44
25.3041	76	62	52	49	56	57	33	37	41	36	32	34	30	27	33	34	45	46	59	51	43
25.3287	67	61	60	52	46	47	37	29	42	39	45	36	34	25	39	36	49	51	60	50	44
25.3533	68	62	59	45	56	57	33	50	54	35	32	47	40	29	24	34	45	48	48	54	39
25.3779	70	59	64	62	51	51	28	41	35	34	35	37	37	28	37	38	40	35	48	56	54
25.4025	58	67	55	54	51	40	28	22	52	36	36	44	33	28	30	41	40	42	56	39	46
25.4271	59	50	67	37	49	52	31	37	47	42	37	34	34	26	35	39	52	46	56	47	53
25.4517	57	55	60	42	48	49	31	36	48	36	38	26	28	32	27	48	35	43	41	52	56
25.4763	61	57	57	51	46	49	32	35	49	45	38	37	34	29	34	42	52	42	54	41	40
25.5009	52	65	57	52	38	38	44	40	35	37	37	50	35	36	24	51	50	44	43	36	43
25.5255	66	48	64	46	44	47	26	31	44	35	40	39	28	25	25	42	29	35	40	50	42
25.55	50	54	60	42	52	46	49	44	27	37	42	36	29	40	31	47	39	40	43	45	42
25.5746	56	66	75	47	48	40	57	40	47	38	37	46	30	20	25	41	39	44	34	39	49
25.5992	56	54	51	55	50	41	37	34	36	34	32	40	29	32	24	37	39	33	55	54	32
25.6238	69	61	56	37	35	40	27	40	37	32	42	33	33	36	22	38	36	43	57	46	41
25.6484	69	72	50	47	50	49	44	43	31	27	34	38	29	29	23	37	36	51	55	43	53
25.673	40	55	54	56	62	48	30	36	37	36	27	31	25	25	26	39	35	26	42	39	43
25.6976	56	66	55	44	50	38	34	39	39	40	31	28	21	29	20	36	33	31	47	56	57
25.7222	62	53	45	34	44	45	35	27	32	32	29	29	20	45	34	30	32	34	42	51	42
25.7468	64	61	57	52	53	42	32	34	40	31	32	42	31	30	33	48	31	37	63	49	51
25.7714	56	53	47	30	42	45	27	28	34	33	36	31	31	26	17	27	32	31	45	39	51
25.796	70	56	54	54	33	45	44	42	35	35	33	32	33	34	23	32	41	36	45	37	44
25.8206	57	68	56	46	43	36	39	32	31	30	32	28	30	30	40	26	40	44	40	43	43
25.8451	56	63	66	38	49	45	36	29	51	29	29	25	17	32	33	38	34	46	49	52	46
25.8697	49	59	55	43	46	42	36	43	36	27	29	32	15	22	23	37	34	31	38	45	39
25.8943	62	46	47	34	43	39	37	39	31	25	31	40	42	22	24	40	30	38	40	39	60
25.9189	55	49	47	46	40	34	40	25	26	36	28	35	25	29	20	31	26	31	38	51	42
25.9435	56	61	50	30	38	47	29	36	34	35	31	33	32	26	24	44	31	35	35	49	44
25.9681	56	63	59	49	45	49	36	34	22	29	30	28	31	27	19	32	41	30	44	40	55
25.9927	50	54	38	39	44	45	38	31	52	40	30	34	30	24	23	30	35	37	39	58	54
26.0173	59	42	62	40	38	37	37	35	38	30	28	30	27	32	25	31	33	37	38	43	36
26.0419	56	52	60	45	40	41	27	47	26	18	27	25	33	34	28	28	31	26	45	39	54
26.0665	48	43	57	47	44	38	39	41	39	28	34	22	21	28	28	38	41	33	45	38	32
26.0911	46	58	51	48	37	40	38	30	32	31	29	37	32	27	23	34	42	29	41	36	43
26.1156	55	60	63	42	37	48	39	30	26	24	30	25	24	28	25	32	38	30	35	37	55
26.1402	55	49	43	38	36	42	32	26	37	15	24	25	31	23	24	35	35	29	38	40	35
26.1648	69	48	44	49	33	28	41	30	34	33	31	17	18	23	25	31	38	29	47	36	41
26.1894	62	62	54	34	34	41	25	39	30	28	34	30	24	31	20	39	36	32	34	48	47
26.214	57	67	40	44	41	35	30	31	27	26	28	26	25	19	27	36	33	34	28	35	36
26.2386	60	44	51	40	44	25	35	35	38	24	20	41	24	39	25	25	43	31	43	38	35
26.2632	49	44	54	44	32	49	29	29	29	31	24	28	23	34	22	25	33	44	32	40	32
26.2878	53	59	51	33	40	40	35	35	22	30	26	28	17	25	21	30	31	32	34	36	43
26.3124	39	48	47	43	28	41	40	20	38	27	34	28	25	12	24	34	27	31	42	34	36
26.337	59	41	41	38	36	51	23	26	34	28	36	28	30	29	31	30	38	33	34	31	39
26.3616	45	66	45	27	43	22	33	37	28	25	23	22	29	18	24	22	18	24	31	38	41
26.3861	56	53	43	43	32	38	25	31	30	23	23	41	22	29	24	33	44	43	34	38	41
26.4107	46	52	49	43	49	36	32	36	31	18	29	26	14	29	21	32	28	27	38	33	38
26.4353	49	53	52	40	42	38	30	21	26	24	20	30	28	20	18	42	27	36	40	34	39
26.4599	52	49	53	34	37	35	30	28	26	24	23	24	21	36	23	27	34	34	38	34	33
26.4845	54	62	40	36	53	40	28	36	40	18	23	24	22	19	24	34	26	24	38	23	38
26.5091	40	46	61	32	32	37	28	27	30	27	29	21	18	11	29	25	26	34	34	30	43
26.5337	45	56	43	43	43	49	25	27	35	27	29	23	22	20	28	30	24	16	35	42	38
26.5583	39	40	53	36	27	36	23	37	28	33	28	24	26	28	30	32	28	29	41	36	37
26.5829	55	48	48	40	38	45	22	35	19	35	25	18	19	23	20	27	17	29	46	42	32
26.6075	48	56	39	34	39	38	31	23	31	21	26	18	24	21	28	29	23	23	39	41	30
26.6321	50	43	42	31	35	33	28	28	15	22	33	19	19	18	22	25	27	34	38	41	38
26.6566	53	54	55	35	39	38	27	29	27	19	21	21	12	19	18	31	21	30	44	33	28
26.6812	52	43	50	31	29	28	26	23	37	27	30	23	17	27	18	22	30	20	37	24	41
26.7058	58	55	43	33	24	41	30	28	29	25	25	22	24	22	25	34	29	30	42	37	42
26.7304	43	40	48	32	33	30	22	18	23	22	19	29	28	32	19	31	23	28	31	39	28
26.755	55	57	46	43	38	46	25	27	33	20	17	17	30	26	13	31	27	32	28	31	40
26.7796	50	44	39	33	29	46	27	25	19	25	28	26	33	35	20	21	34	34	33	42	29
26.8042	36	43	48	31	40	36	29	31	21	30	19	28	13	23	17	32	19	22	39	30	33
26.8288	45	46	30	38	39	38	34	33	26	22	22	24	16	13	23	26	23	32	33	30	30
26.8534	50	55	49	33	36	38	25	27	25	27	27	29	22	23	25	28	26	22	36	38	31
26.878	49	54	52	40	30	24	31	35	32	25	16	17	20	25	18	28	30	32	31	29	32
26.9026	41	46	57	40	33	27	17	29	35	25	18	15	21	18	22	24	25	20	33	47	33
26.9271	37	41	40	28	20	30	30	22	22	25	30	24	15	25	20	31	32	26	36	39	40
26.9517	44	41	60	41	27	32	25	28	31	34	21	26	23	17	17	25	23	27	30	25	28
26.9763	40	39	41	34	36	33	15	33	22	26	20	18	14	25	26	30	27	35	37	35	43
27.0009	43	36	54	28	31	43	24	29	20	21	28	27	20	24	21	24	26	22	39	35	39
27.0255	60	39	52	38	22	33	34	25	22	28	17	25	17	17	17	30	21	32	32	27	29
27.0501	34	38	53	36	33	37	25	39	22	21	20	22	21	32	22	31	26	21	34	37	31
27.0747	36	50	45	31	28	36	30	26	22	21	27	13	20	18	22	24	25	38	36	40	25
27.0993	53	40	36	40	34	33	19	28	24	24	25	28	15	15	17	19	25	20	27	38	44
27.1239	31	50	54	23	25	31	34	23	26	16	20	25	20	20	19	20	22	17	39	32	28
27.1485	50	43	53	28	32	27	27	28	24	21	12	24	14	15	17	19	26	25	27	34	32
27.1731	50	43	34	27	38	26	34	20	31	24	22	22	21	21	19	34	29	24	35	21	27
27.1976	39	38	44	34	34	33	31	30	28	20	20	21	20	21	18	18	27	35	35	34	37
27.2222	31	41	47	25	27	37	22	28	27	18	20	24	23	14	20	29	37	20	32	36	28
27.2468	53	43	44	21	31	29	25	22	20	13	24	24	15	23	17	29	27	20	33	35	32
27.2714	28	34	47	35	33	29	19	21	22	25	25	21	21	22	15	20	27	27	35	31	43
27.296	40	50	45	35	23	31	18	26	21	14	23	26	26	21	18	21	21	25	27	45	30
27.3206	46	36	39	24	28	31	31	19	23	23	15	23	18	13	21	20	18	32	26	31	38
27.3452	44	54	35	33	27	30	29	32	27	26	20	19	17	16	14	28	25	25	27	38	34
27.3698	43	47	46	30	27	24	20	28	27	22	27	25	20	21	20	21	24	29	22	32	29
27.3944	35	43	40	28	26	27	32	27	22	24	14	14	13	17	18	24	24	28	31	29	27
27.419	36	37	44	26	35	32	27	31	24	17	23	23	14	18	18	23	37	28	26	26	28
27.4436	39	50	44	22	22	28	21	25	30	23	18	20	8	17	17	37	24	24	26	26	41
27.4681	39	49	35	31	28	35	26	32	27	18	26	22	16	14	21	19	26	20	33	28	29
27.4927	42	42	49	30	32	22	30	15	15	23	15	16	20	22	10	20	20	24	27	39	36
27.5173	45	45	43	30	33	30	23	29	27	14	19	18	18	23	14	17	29	27	18	29	31
27.5419	44	43	49	34	35	37	23	22	24	20	15	22	17	21	19	20	21	20	27	44	30
27.5665	43	43	47	36	31	35	19	25	22	26	18	14	18	14	16	10	18	25	29	31	24
27.5911	45	46	33	36	32	27	22	18	24	22	17	15	33	16	26	16	22	19	27	23	29
27.6157	45	46	53	26	35	23	22	24	25	20	17	11	14	15	24	28	17	26	30	33	31
27.6403	46	47	46	23	29	32	30	26	26	14	21	22	12	19	19	15	24	29	29	23	24
27.6649	43	42	30	28	30	30	13	18	27	16	18	15	15	15	28	24	17	21	32	33	30
27.6895	34	38	46	21	26	32	18	25	26	16	27	16	17	15	13	21	20	26	23	26	27
27.7141	28	45	36	22	33	30	18	22	22	24	17	15	25	18	17	18	29	25	26	40	24
27.7386	40	43	42	28	22	33	20	18	21	22	20	21	9	12	18	30	18	10	27	21	27
27.7632	28	47	31	28	36	30	12	34	32	24	27	18	13	13	12	24	25	24	23	29	29
27.7878	52	37	43	18	29	32	22	36	16	26	22	22	7	15	12	22	20	25	35	36	34
27.8124	40	32	36	39	28	27	25	23	17	17	17	18	12	12	15	22	18	18	29	30	32
27.837	36	50	33	21	21	30	23	25	27	26	18	20	11	21	18	26	25	17	23	24	28
27.8616	55	27	22	17	32	29	21	27	21	16	25	25	23	13	15	19	25	22	24	29	18
27.8862	40	30	33	26	29	26	24	21	15	13	17	18	17	18	19	19	24	23	30	30	37
27.9108	47	36	34	28	27	30	23	17	15	17	23	16	16	22	12	21	33	17	35	29	29
27.9354	38	36	39	32	28	21	21	19	14	18	22	24	21	17	20	16	12	21	29	23	35
27.96	45	42	41	32	30	29	14	22	18	21	16	21	17	10	14	17	16	18	31	35	20
27.9846	46	40	46	23	29	36	25	13	23	15	16	16	13	12	19	27	15	24	37	32	26
28.0091	24	49	25	42	27	23	23	19	20	12	18	17	12	11	21	19	23	20	36	21	28
28.0337	32	39	43	34	23	18	27	25	15	14	19	17	19	13	17	12	26	23	26	27	37
28.0583	22	32	30	32	29	25	22	26	11	19	19	19	12	17	17	31	26	22	29	28	32
28.0829	40	32	31	24	22	28	17	24	20	15	20	17	18	23	12	19	19	23	23	35	33
28.1075	33	40	32	22	36	32	22	24	23	18	20	24	11	10	12	21	24	14	25	21	36
28.1321	44	25	33	23	29	25	20	28	17	23	17	17	19	12	12	19	13	21	27	28	31
28.1567	31	42	48	28	31	34	14	14	21	11	21	16	14	15	11	21	21	22	25	31	40
28.1813	37	36	29	31	24	24	21	21	22	14	13	21	14	11	14	17	18	19	30	22	17
28.2059	43	36	35	27	17	27	23	17	18	21	15	20	9	10	15	23	31	21	26	30	25
28.2305	28	33	50	22	27	31	21	18	20	19	12	14	16	20	11	23	24	26	26	24	23
28.2551	56	34	27	27	21	26	22	21	14	8	19	14	16	8	14	18	20	16	26	18	22
28.2797	32	36	46	16	22	18	20	16	22	14	23	21	11	14	13	26	24	19	22	30	28
28.3042	35	43	33	15	24	33	20	27	17	15	17	13	7	13	14	18	19	29	24	31	31
28.3288	49	30	42	28	24	22	20	18	15	19	18	12	7	14	12	21	17	23	20	22	23
28.3534	27	38	40	23	28	28	20	30	16	18	11	16	19	22	21	12	15	19	34	31	25
28.378	45	33	33	24	25	28	19	30	20	25	19	15	13	17	16	15	17	20	26	19	20
28.4026	28	32	32	26	26	23	17	13	26	16	16	12	8	19	17	17	19	26	27	26	22
28.4272	35	35	34	30	23	28	23	18	10	17	19	18	14	13	14	14	18	21	24	25	23
28.4518	35	40	28	22	26	28	18	15	23	20	9	16	16	19	16	18	22	17	30	28	32
28.4764	34	37	26	27	28	30	24	18	26	15	12	23	16	15	14	24	16	20	27	27	26
28.501	27	36	30	25	24	23	23	24	21	18	21	19	13	14	18	17	21	25	29	32	32
28.5256	41	39	47	37	17	31	18	26	17	12	19	19	15	12	13	26	22	21	25	17	24
28.5502	26	21	37	22	23	19	14	20	11	17	17	20	16	13	16	13	21	14	22	27	26
28.5747	51	31	34	27	26	25	16	20	15	11	17	15	15	12	11	17	25	19	36	24	34
28.5993	39	29	46	26	22	28	22	16	21	14	13	14	14	12	12	16	15	24	22	31	29
28.6239	28	22	35	28	23	35	14	20	20	13	11	19	11	15	9	21	17	20	28	28	30
28.6485	31	27	32	30	31	19	18	15	20	16	18	16	8	13	13	9	17	18	20	33	20
28.6731	30	37	30	19	20	26	23	17	15	11	15	18	12	4	19	19	20	21	26	24	20
28.6977	34	40	30	27	28	25	18	18	25	12	18	16	9	14	16	12	23	18	30	24	17
28.7223	39	40	15	23	28	21	18	16	25	16	10	21	10	14	14	16	28	19	26	22	27
28.7469	37	25	27	25	28	27	19	25	18	18	20	15	19	15	9	23	12	21	22	30	16
28.7715	35	33	40	30	18	28	19	23	22	15	21	15	22	9	16	20	19	25	30	21	22
28.7961	41	40	27	19	28	25	25	18	21	20	17	16	21	14	14	17	25	19	26	19	30
28.8207	37	28	30	21	21	25	16	22	11	14	14	24	13	12	15	17	20	19	21	28	10
28.8452	34	30	34	20	23	27	23	17	20	15	14	11	9	10	8	20	24	17	29	22	23
28.8698	31	30	32	20	19	14	18	21	24	17	12	17	15	8	17	16	22	14	19	20	22
28.8944	41	31	33	21	21	25	26	15	17	9	16	19	11	13	16	20	22	10	17	24	20
28.919	31	38	22	18	20	15	18	18	15	14	9	17	8	9	18	18	21	15	22	27	26
28.9436	28	30	32	25	18	28	17	16	28	7	15	10	11	17	15	22	25	22	30	22	29
28.9682	25	35	29	28	25	28	17	20	21	17	16	18	14	16	15	25	24	21	24	18	28
28.9928	33	25	43	22	27	19	17	11	16	15	14	19	16	12	14	22	16	25	30	27	15
29.0174	32	27	35	19	24	25	23	27	13	8	14	12	5	8	15	20	21	16	25	19	23
29.042	26	32	37	24	19	30	10	21	18	11	18	15	13	19	15	18	15	26	33	21	30
29.0666	29	35	27	24	23	20	15	13	6	16	16	14	21	11	11	16	21	21	25	22	16
29.0912	31	27	38	27	25	17	12	17	15	14	12	17	10	12	5	20	17	21	22	32	23
29.1157	27	42	22	24	23	16	18	14	14	19	12	12	9	7	14	22	16	18	17	26	36
29.1403	27	39	35	20	20	29	15	12	17	12	9	14	12	20	13	31	23	20	16	13	31
29.1649	22	37	36	18	14	23	11	12	24	13	13	18	13	14	8	16	20	16	30	22	22
29.1895	30	33	34	17	24	23	22	17	19	10	10	17	15	12	12	8	19	17	28	35	11
29.2141	31	34	34	25	25	18	13	16	17	20	17	16	7	6	12	15	19	11	18	23	28
29.2387	31	31	31	16	23	31	24	17	23	15	11	11	9	12	13	18	17	15	17	31	21
29.2633	28	30	36	24	21	25	13	12	17	12	19	14	12	12	16	18	15	14	17	15	21
29.2879	23	22	33	15	21	19	17	14	21	10	14	14	11	11	6	20	15	22	22	18	30
29.3125	27	36	36	27	24	14	13	25	15	17	15	11	6	6	15	14	23	20	30	26	26
29.3371	29	33	35	22	23	17	21	12	10	15	11	13	11	12	12	18	27	14	25	24	18
29.3617	32	28	29	24	22	14	13	15	15	14	14	19	8	2	12	26	15	18	22	30	17
29.3862	30	34	24	22	20	24	24	22	17	7	12	19	11	8	7	15	15	19	21	26	18
29.4108	29	34	28	28	12	21	16	16	17	9	9	16	11	17	15	16	15	13	25	26	28
29.4354	48	24	29	28	29	20	17	15	14	12	15	13	11	14	14	13	10	18	27	24	27
29.46	21	25	30	20	12	14	21	18	16	16	15	7	9	2	10	19	16	12	15	21	16
29.4846	32	41	28	11	17	19	23	17	15	9	14	11	10	13	9	16	14	14	27	19	24
29.5092	22	31	32	21	14	10	14	20	18	14	12	14	11	11	15	14	15	28	24	24	19
29.5338	34	44	27	17	16	20	18	17	22	15	15	17	11	13	14	22	20	14	24	24	25
29.5584	30	32	27	19	25	17	13	16	16	18	16	15	8	22	17	28	14	12	18	25	18
29.583	28	35	24	19	20	26	13	14	18	15	12	16	7	14	10	18	16	10	25	17	25
29.6076	23	25	31	16	29	21	11	14	15	17	7	11	13	11	15	12	22	19	18	23	21
29.6322	39	35	39	17	16	20	12	18	22	18	14	16	7	3	14	21	13	15	20	26	22
29.6567	27	25	28	24	22	21	19	8	13	6	13	9	5	12	19	13	12	18	20	24	24
29.6813	35	37	30	23	18	25	13	17	13	14	11	14	16	9	9	14	10	19	23	19	19
29.7059	31	27	24	27	18	23	20	19	12	9	13	10	8	12	11	17	15	9	19	16	19
29.7305	33	27	27	25	16	18	13	14	11	17	18	12	12	16	11	21	13	17	18	24	26
29.7551	28	26	31	19	21	23	13	12	13	21	20	13	13	8	10	16	23	12	22	21	18
29.7797	26	28	20	16	30	25	14	15	21	13	13	7	10	6	10	13	15	18	25	17	22
29.8043	20	27	26	23	16	23	15	20	12	11	10	14	5	9	14	12	17	17	12	18	22
29.8289	18	20	29	17	24	17	17	15	13	12	14	16	12	9	8	22	18	14	18	16	22
29.8535	23	34	29	19	28	19	4	14	15	8	15	11	14	13	9	19	21	19	22	18	24
29.8781	37	18	26	12	22	16	20	18	18	10	14	10	8	10	9	11	21	16	18	16	19
29.9027	32	35	29	15	23	23	15	16	14	12	9	18	8	7	12	13	7	10	25	22	26
29.9272	27	31	17	19	20	18	24	18	11	12	16	7	4	10	7	17	19	18	20	13	18
29.9518	35	27	25	13	27	19	15	14	14	8	10	14	6	11	4	12	11	14	15	17	23
29.9764	28	29	17	24	24	18	13	17	13	8	11	12	6	5	14	26	11	12	15	15	20
30.001	40	28	35	14	18	15	6	19	18	14	9	12	9	12	14	17	14	19	18	20	16
30.0256	29	35	33	10	20	13	15	11	15	12	6	9	11	11	12	9	14	27	22	27	14
30.0502	25	20	39	15	21	18	16	12	20	9	10	14	6	6	10	18	10	16	13	18	21
30.0748	30	29	27	17	23	12	15	13	14	16	8	8	9	12	9	8	11	12	15	14	22
30.0994	18	25	17	15	12	20	15	18	16	20	14	8	6	16	19	21	8	21	14	15	16
30.124	16	45	28	22	23	26	15	11	16	13	6	13	9	14	14	16	21	17	15	17	24
30.1486	27	31	24	17	22	21	18	13	19	7	8	11	8	11	12	16	15	15	21	19	15
30.1732	26	31	31	15	26	22	14	22	13	13	14	10	4	14	7	10	13	19	16	23	23
30.1977	27	28	33	16	18	14	19	13	10	10	9	14	13	11	8	19	16	17	18	17	15
30.2223	27	30	34	22	20	19	10	13	13	19	7	16	11	9	4	17	13	17	22	18	25
30.2469	14	24	28	20	21	17	19	14	20	6	8	12	12	9	3	14	9	12	20	17	18
30.2715	23	27	23	18	17	19	11	13	5	10	18	15	10	10	10	10	13	14	22	11	23
30.2961	26	29	22	17	23	17	14	15	10	7	14	13	13	5	13	14	8	15	24	21	16
30.3207	33	23	21	18	14	23	13	10	11	12	12	10	14	11	8	15	11	18	13	23	20
30.3453	21	30	25	18	21	19	10	13	12	12	8	8	10	16	9	14	15	20	27	20	6
30.3699	31	19	22	13	11	25	20	17	15	8	6	5	14	12	11	16	14	8	21	20	26
30.3945	34	28	41	21	18	19	13	13	18	13	7	9	4	15	11	12	13	15	13	18	20
30.4191	33	24	32	13	20	23	15	16	14	17	12	14	5	12	10	14	18	14	14	10	23
30.4437	21	24	25	21	21	15	13	13	13	6	14	10	5	12	8	12	9	15	16	18	15
30.4682	23	27	16	29	18	21	6	16	10	17	15	7	4	8	12	17	11	16	22	21	16
30.4928	21	20	31	20	15	12	13	14	18	14	12	13	9	9	9	14	16	14	23	19	16
30.5174	32	33	26	17	11	23	20	15	15	10	12	17	7	9	9	20	19	14	16	16	24
30.542	24	21	27	17	21	20	16	15	19	5	8	9	5	12	11	11	23	7	20	25	17
30.5666	32	22	26	13	20	13	12	9	11	7	8	10	13	4	5	12	6	17	19	20	21
30.5912	23	33	28	20	18	17	9	13	8	15	11	15	10	9	5	10	10	11	23	15	20
30.6158	29	25	28	17	20	18	12	11	12	6	16	14	6	5	9	12	15	14	13	21	22
30.6404	19	24	20	20	23	15	14	17	12	12	9	11	10	10	9	18	15	18	21	21	13
30.665	18	32	31	16	14	10	9	14	23	10	9	9	9	11	9	13	13	9	20	15	20
30.6896	25	29	22	21	18	16	8	17	6	7	9	11	9	5	10	15	13	16	21	18	15
30.7142	26	29	29	25	16	20	6	17	4	6	12	10	6	12	5	16	23	15	14	16	12
30.7387	28	24	26	9	12	17	17	15	19	10	10	15	9	11	9	20	19	8	21	19	25
30.7633	18	34	26	17	10	18	9	16	10	8	13	11	9	10	12	17	11	9	22	15	12
30.7879	28	31	21	17	22	22	11	12	10	8	12	9	10	9	12	8	15	15	17	15	24
30.8125	30	19	18	12	19	20	10	14	15	14	7	9	8	1	8	11	13	7	11	10	25
30.8371	23	19	27	15	13	11	13	19	7	12	16	11	7	6	13	12	16	17	17	23	19
30.8617	20	25	20	17	14	21	14	16	18	13	7	11	6	5	9	12	11	12	19	14	17
30.8863	30	26	26	19	18	13	19	14	11	10	8	7	7	5	11	11	14	12	27	12	13
30.9109	24	22	14	11	8	17	11	9	12	11	11	8	6	3	11	17	20	10	24	22	19
30.9355	22	31	32	19	15	7	10	14	9	13	9	21	9	7	10	13	16	9	21	21	15
30.9601	25	30	22	20	14	17	16	12	16	11	6	10	9	9	7	9	12	14	16	10	17
30.9847	29	18	25	15	14	19	10	11	14	10	14	13	8	8	9	10	9	17	11	21	18
31.0093	17	21	30	19	19	19	18	20	9	13	9	10	9	7	12	11	12	12	19	18	18
31.0338	25	18	24	16	11	19	11	20	12	5	7	10	11	12	4	12	12	10	23	26	14
31.0584	17	22	15	17	16	24	13	17	13	8	6	9	6	8	10	12	11	11	21	21	20
31.083	34	19	24	11	23	20	8	13	14	6	11	13	6	10	5	17	18	7	19	24	23
31.1076	18	19	19	18	12	14	10	13	7	12	8	9	8	5	4	8	10	13	13	21	12
31.1322	19	30	24	25	23	22	10	16	17	6	6	10	6	7	6	10	7	12	14	19	14
31.1568	20	23	23	19	17	18	11	11	6	9	9	10	13	9	12	18	16	8	15	15	20
31.1814	24	20	22	17	17	19	14	10	11	14	8	9	6	7	6	9	8	9	14	15	15
31.206	22	19	16	23	8	22	16	13	15	16	8	9	5	6	8	6	10	7	15	13	13
31.2306	22	20	17	12	16	22	14	14	7	14	6	11	8	12	10	15	7	6	17	20	22
31.2552	19	14	26	22	25	15	9	7	9	9	15	6	9	7	8	17	11	10	15	15	7
31.2798	27	31	29	15	16	11	14	16	13	13	14	5	8	9	10	14	7	14	18	10	16
31.3043	24	22	28	12	12	16	17	10	12	9	10	6	9	7	7	15	14	20	15	19	12
31.3289	26	23	25	16	5	8	10	13	8	10	7	16	10	11	4	13	14	13	12	15	16
31.3535	26	27	20	14	19	16	10	7	15	9	8	15	8	3	4	12	13	12	18	16	20
31.3781	21	25	21	22	26	18	9	12	13	11	7	9	10	10	4	16	14	13	15	21	13
31.4027	29	30	24	20	12	7	18	13	9	9	9	7	7	6	3	15	10	12	11	12	10
31.4273	30	25	20	16	9	12	10	18	15	8	11	8	6	5	3	16	8	11	9	8	17
31.4519	18	24	19	18	17	15	12	14	11	8	9	4	7	10	8	12	7	6	18	17	14
31.4765	23	23	17	15	13	16	16	10	15	10	8	4	7	10	14	13	10	12	31	14	18
31.5011	15	18	23	12	23	16	10	17	7	7	7	7	7	8	4	5	12	14	11	22	15
31.5257	23	28	15	12	22	23	18	16	4	6	5	9	5	7	7	13	13	9	11	18	16
31.5503	21	15	28	8	15	17	12	12	12	6	10	10	3	7	7	8	11	16	12	11	15
31.5748	25	13	21	18	20	15	8	12	13	5	8	3	8	13	8	23	17	18	14	17	15
31.5994	23	20	25	16	12	17	10	9	12	6	9	11	8	12	8	13	11	10	13	23	14
31.624	30	19	25	15	13	15	15	14	8	12	16	10	7	5	7	13	16	11	16	18	9
31.6486	23	27	21	19	15	15	11	13	8	11	15	13	5	10	4	15	6	7	18	19	16
31.6732	15	19	19	18	16	10	11	12	17	8	12	10	3	4	8	10	8	9	14	19	11
31.6978	26	18	22	17	22	18	12	21	11	8	10	4	11	8	8	10	13	9	23	14	10
31.7224	20	21	34	16	13	16	11	8	15	6	11	8	8	7	7	14	9	11	5	18	12
31.747	12	21	25	12	15	16	11	12	12	13	7	13	5	3	6	12	17	14	12	13	11
31.7716	26	33	24	18	14	15	6	12	11	9	20	8	9	5	4	14	9	19	23	18	16
31.7962	21	23	29	14	12	13	8	13	8	11	9	9	7	4	3	11	9	10	21	15	14
31.8208	26	30	15	10	8	10	11	14	13	10	11	7	8	8	11	12	9	7	15	14	11
31.8453	16	24	29	17	17	12	15	8	12	8	5	9	11	11	2	8	12	6	14	19	8
31.8699	24	22	20	8	16	22	8	11	9	9	13	8	9	8	7	8	16	8	17	11	18
31.8945	16	28	22	13	13	8	7	17	9	8	5	5	6	5	9	17	9	6	18	16	17
31.9191	20	22	25	11	18	8	12	4	12	8	9	11	8	5	6	16	10	12	13	17	13
31.9437	13	14	18	15	11	11	12	5	6	10	9	9	4	9	7	15	11	8	10	18	9
31.9683	15	18	21	14	13	20	7	5	7	14	9	4	5	5	7	11	13	12	10	19	16
31.9929	21	23	27	16	16	9	8	10	13	6	9	3	6	7	5	14	14	14	13	10	18
32.0175	24	20	17	13	16	11	9	14	11	13	7	9	5	12	6	8	10	8	20	16	9
32.0421	12	20	26	8	16	12	11	7	10	11	12	5	6	9	5	8	12	7	13	8	17
32.0667	16	22	21	15	11	20	12	12	12	8	9	5	3	8	10	9	11	13	11	8	16
32.0913	19	22	21	12	13	15	12	8	10	7	14	8	8	12	7	7	11	11	18	11	11
32.1158	19	14	28	16	19	13	5	12	10	7	12	14	9	3	8	9	9	9	14	10	11
32.1404	20	19	24	18	8	13	13	15	10	12	12	8	6	7	12	11	2	21	8	14	20
32.165	14	21	19	12	18	15	14	13	13	11	9	14	7	4	4	9	12	10	9	7	17
32.1896	22	20	12	11	11	19	8	15	7	11	9	9	5	5	5	10	13	6	15	18	13
32.2142	17	14	23	22	13	11	11	14	8	10	11	9	9	3	7	5	14	12	14	13	13
32.2388	25	22	19	15	15	18	15	6	9	9	4	4	6	8	5	7	7	7	12	9	21
32.2634	23	21	20	17	10	8	9	14	12	8	4	9	3	11	6	13	10	11	10	11	10
32.288	14	18	20	14	13	13	16	5	7	5	10	4	9	4	6	15	12	8	18	10	16
32.3126	17	13	20	14	14	10	9	9	8	5	7	6	8	9	6	6	6	18	16	13	16
32.3372	10	13	18	10	20	12	8	15	7	11	12	8	4	3	6	21	9	8	16	14	21
32.3618	21	21	21	8	18	12	9	11	14	10	10	9	8	6	8	12	8	12	19	20	22
32.3863	11	17	27	13	10	14	15	5	12	6	4	7	6	8	6	11	10	8	12	13	8
32.4109	26	18	9	18	8	13	11	7	13	12	5	11	5	3	6	5	5	7	11	13	12
32.4355	21	23	20	12	10	21	11	9	5	8	6	11	9	3	2	11	7	11	11	10	10
32.4601	24	18	18	13	14	14	8	9	16	4	4	11	4	7	8	10	10	5	13	19	12
32.4847	15	22	19	19	21	12	5	6	15	6	6	6	10	6	10	11	11	8	11	15	17
32.5093	17	23	17	13	14	15	7	6	11	10	0	8	11	8	5	14	13	10	9	12	12
32.5339	18	20	22	11	15	22	4	12	12	5	12	7	4	5	5	10	8	10	14	8	12
32.5585	17	18	14	16	7	14	12	6	8	6	7	7	3	8	7	8	8	13	11	10	9
32.5831	21	18	28	14	18	13	9	8	8	11	3	8	4	6	5	10	11	11	12	15	10
32.6077	21	22	16	12	13	15	5	9	9	4	11	2	4	6	4	6	13	7	10	8	14
32.6323	18	21	17	11	12	19	14	5	8	10	6	9	6	7	5	2	5	5	12	14	13
32.6568	20	23	18	14	15	15	4	10	8	5	7	10	3	6	8	8	4	14	12	13	13
32.6814	15	21	17	8	19	17	6	10	8	8	12	7	3	8	3	9	6	13	11	11	12
32.706	18	23	19	19	17	12	6	8	5	2	8	4	6	8	8	10	13	9	15	18	13
32.7306	12	16	21	16	11	9	12	12	10	9	7	8	7	2	12	15	7	12	13	13	12
32.7552	23	18	19	6	8	17	6	8	7	7	6	8	3	9	5	10	9	6	18	20	14
32.7798	15	19	11	9	14	14	8	8	7	7	9	5	4	4	2	6	13	7	10	15	16
32.8044	14	22	19	12	19	10	10	11	9	9	11	9	6	8	2	9	6	9	11	12	13
32.829	14	16	17	9	15	13	8	13	10	15	10	7	4	6	5	12	7	9	12	12	17
32.8536	27	25	24	7	16	11	9	10	19	6	9	7	8	7	6	7	6	16	12	13	17
32.8782	21	14	11	9	11	9	14	3	14	13	6	4	8	5	5	10	15	13	23	13	10
32.9028	29	20	19	10	10	9	7	13	9	6	8	11	3	6	4	15	7	10	13	11	12
32.9273	16	14	17	14	13	8	6	10	13	8	6	6	7	5	5	4	6	4	12	9	9
32.9519	16	17	9	15	16	11	10	13	11	3	10	6	8	10	6	11	10	4	15	15	12
32.9765	34	22	15	14	18	17	7	11	11	6	10	3	5	6	6	6	6	11	18	7	7
33.0011	15	22	17	13	16	13	8	13	10	12	10	8	6	3	7	12	7	11	15	10	11
33.0257	17	14	26	8	7	8	11	11	10	5	8	8	5	4	7	10	6	14	16	17	9
33.0503	22	16	23	10	10	12	6	9	9	9	9	7	1	10	8	11	15	13	13	12	9
33.0749	20	12	11	14	13	9	10	10	8	8	5	8	6	6	8	7	14	3	15	18	11
33.0995	12	12	15	11	14	11	6	5	6	5	3	7	7	3	3	6	8	13	11	7	12
33.1241	19	20	17	13	12	14	11	11	6	7	7	10	8	7	8	9	12	9	10	13	18
33.1487	15	12	15	14	13	13	5	11	8	9	5	7	3	3	3	8	8	7	9	10	12
33.1733	8	20	19	9	11	13	11	4	8	7	10	3	6	8	4	8	6	13	18	12	15
33.1979	18	19	13	10	15	7	9	10	5	8	9	6	2	4	7	6	11	4	11	15	11
33.2224	17	17	16	17	12	13	8	14	10	4	10	7	5	5	6	12	9	5	9	14	12
33.247	22	17	24	16	7	11	8	8	12	8	6	9	4	9	8	12	5	15	11	12	8
33.2716	18	13	17	13	10	7	9	10	10	5	9	11	8	3	5	13	13	5	13	8	7
33.2962	15	22	11	18	4	12	12	5	6	7	4	3	3	5	5	11	7	6	11	12	8
33.3208	13	27	12	15	15	17	9	7	10	3	15	5	5	7	5	9	4	13	13	7	9
33.3454	17	16	11	16	12	18	9	5	10	8	6	8	6	3	4	14	7	8	11	10	8
33.37	15	19	13	14	7	15	2	10	9	8	9	8	6	8	4	11	9	9	13	6	9
33.3946	16	15	23	15	9	21	16	6	8	11	12	0	9	5	6	6	9	15	10	13	11
33.4192	17	17	21	10	22	16	10	5	8	6	8	3	3	6	8	14	12	12	13	16	15
33.4438	19	21	18	13	9	16	12	9	10	3	4	4	5	3	4	7	9	9	10	8	4
33.4684	15	14	13	19	10	11	16	7	8	8	6	8	5	3	4	3	3	13	7	7	7
33.4929	14	13	18	9	16	13	8	7	2	7	5	12	3	7	1	6	7	16	16	11	8
33.5175	21	18	18	12	12	13	9	10	8	6	10	5	5	7	3	8	10	5	7	8	13
33.5421	9	18	10	16	8	15	13	11	12	9	7	14	0	10	3	8	4	13	12	12	15
33.5667	17	20	18	12	11	12	9	10	8	4	4	7	5	6	2	11	7	8	11	10	11
33.5913	21	17	16	8	13	14	9	13	11	8	4	7	9	5	5	11	6	5	11	9	7
33.6159	16	17	21	14	10	11	9	9	9	4	7	6	0	6	5	7	11	11	12	15	12
33.6405	18	16	14	14	10	9	5	4	5	5	4	6	5	10	5	5	10	10	7	16	8
33.6651	16	19	18	14	8	11	5	12	7	5	5	10	4	5	3	14	5	8	8	13	14
33.6897	18	16	15	11	15	11	15	13	6	6	6	10	5	4	1	5	3	5	10	7	9
33.7143	17	16	8	13	12	7	9	8	5	5	9	6	4	12	4	5	7	5	13	13	9
33.7389	19	17	12	16	3	11	7	6	12	6	9	8	3	5	4	9	8	9	9	8	12
33.7634	19	11	21	12	13	7	9	11	9	6	9	2	4	6	5	4	8	10	9	9	7
33.788	16	13	7	8	10	7	7	6	11	3	7	5	2	5	3	9	14	7	6	9	10
33.8126	14	9	16	10	16	10	4	12	13	4	12	4	7	3	8	9	5	8	11	5	16
33.8372	13	17	18	8	9	9	8	5	7	6	6	4	4	0	4	9	10	14	8	9	13
33.8618	14	13	11	10	13	11	6	13	7	8	6	7	2	5	7	10	9	9	9	14	15
33.8864	16	15	8	13	6	9	13	8	11	7	4	4	8	4	7	5	7	12	10	13	19
33.911	12	17	12	15	11	12	5	4	12	6	3	4	0	6	5	3	10	7	11	10	5
33.9356	16	13	10	13	12	10	8	4	6	5	6	4	7	4	2	9	6	10	14	6	10
33.9602	21	18	8	3	13	13	4	6	9	3	2	5	2	9	8	8	10	8	4	8	9
33.9848	16	12	19	13	13	8	10	8	5	6	5	5	7	3	3	7	6	12	14	7	12
34.0094	22	7	14	8	13	8	6	5	5	4	2	5	1	5	9	9	6	9	14	13	11
34.0339	11	17	18	6	8	12	5	5	11	7	2	3	4	6	5	8	6	13	9	15	9
34.0585	17	21	10	12	11	11	9	11	8	6	7	9	5	7	2	10	7	7	5	17	12
34.0831	20	8	16	11	5	11	8	11	7	5	4	8	4	4	3	7	8	6	8	8	8
34.1077	16	20	10	9	17	6	9	6	10	7	4	8	5	5	5	7	7	3	9	10	16
34.1323	10	12	10	5	9	7	10	10	9	7	7	6	1	5	6	10	5	8	11	14	15
34.1569	9	9	17	11	11	6	5	7	7	4	3	7	2	3	4	6	7	7	13	8	10
34.1815	17	13	20	9	10	4	2	6	5	5	8	7	3	8	3	2	4	8	7	7	4
34.2061	8	12	17	7	6	10	6	9	7	9	6	3	1	5	2	9	2	5	12	10	10
34.2307	15	13	8	7	12	6	5	8	5	7	8	9	7	7	6	7	6	6	11	10	9
34.2553	10	12	12	12	10	9	8	10	11	4	6	8	6	5	3	10	5	6	12	8	10
34.2799	12	13	15	7	3	8	12	4	6	8	3	2	5	3	6	5	6	8	12	6	8
34.3044	18	14	10	12	17	11	10	10	14	5	13	5	3	2	2	3	5	6	11	8	10
34.329	14	12	10	6	9	9	10	6	9	6	8	4	6	4	4	8	6	4	7	12	12
34.3536	15	16	14	13	4	12	7	7	7	3	10	5	4	5	3	6	6	10	8	7	4
34.3782	17	15	10	10	12	10	8	8	6	7	8	3	4	5	4	4	9	1	6	16	9
34.4028	12	14	13	13	11	11	4	4	5	5	7	2	5	6	6	5	4	10	8	10	6
34.4274	21	19	19	9	10	10	3	4	10	5	3	7	4	8	4	6	6	3	12	12	6
34.452	6	12	13	10	5	9	14	10	15	7	8	3	4	2	9	2	8	9	9	12	10
34.4766	7	12	13	9	7	14	2	6	8	5	14	5	3	4	3	4	6	6	6	7	8
34.5012	18	19	15	13	14	10	8	5	5	3	9	6	4	10	4	14	3	7	12	9	7
34.5258	11	13	17	10	11	7	6	5	5	7	6	10	0	4	4	10	10	3	10	10	6
34.5504	11	11	11	9	8	11	7	3	4	4	3	6	6	4	7	9	11	6	8	7	13
34.5749	20	10	16	4	7	3	3	8	2	6	5	3	3	3	1	3	8	10	8	11	8
34.5995	15	13	14	10	7	12	4	8	8	6	6	7	3	4	3	4	5	6	8	8	4
34.6241	10	18	13	4	7	11	8	6	8	6	5	5	2	4	3	9	5	4	8	6	11
34.6487	12	13	12	9	7	9	5	3	4	6	9	7	7	6	4	4	5	8	8	13	9
34.6733	7	9	13	10	9	7	5	7	7	7	7	3	3	8	2	6	7	9	6	11	12
34.6979	9	11	13	5	8	10	8	6	11	6	9	4	8	7	3	9	5	4	9	12	4
34.7225	7	9	19	10	11	6	5	7	7	7	6	3	4	3	4	5	8	5	11	9	8
34.7471	10	15	12	10	12	16	2	11	4	5	2	10	4	7	7	6	6	7	5	9	11
34.7717	7	11	16	9	11	10	5	7	5	7	2	2	4	8	4	8	8	5	11	7	9
34.7963	12	13	8	12	4	8	4	6	6	8	6	2	2	1	1	6	9	10	10	8	5
34.8209	16	14	14	7	6	6	6	9	11	7	5	6	3	4	4	10	6	4	11	10	4
34.8454	16	9	12	6	10	8	5	6	6	7	6	6	5	4	2	12	5	9	5	19	6
34.87	15	14	14	10	5	2	6	2	10	5	11	4	9	10	7	7	8	8	17	10	6
34.8946	15	8	9	11	7	11	7	8	6	2	2	5	4	4	5	8	2	8	7	7	5
34.9192	14	13	12	5	10	10	3	7	5	3	5	3	3	4	2	8	5	5	6	7	13
34.9438	6	21	13	12	8	11	6	8	8	8	6	3	3	3	4	5	8	8	10	8	9
34.9684	14	13	6	7	10	1	3	5	10	3	6	3	4	4	2	5	6	7	6	12	7
34.993	14	8	17	6	11	4	7	5	8	5	2	4	4	6	6	3	4	10	14	8	15
35.0176	10	13	17	9	7	14	8	4	10	5	3	4	2	7	5	4	3	9	5	4	7
35.0422	11	12	9	9	3	10	5	5	7	8	10	4	3	5	1	4	6	5	7	13	9
35.0668	12	13	11	8	10	10	10	3	4	3	2	4	6	7	2	7	6	5	8	8	13
35.0914	8	10	9	9	11	6	4	6	9	6	9	3	3	4	4	5	11	9	10	6	7
35.1159	15	11	12	11	8	5	3	7	5	4	5	4	2	2	1	6	4	7	6	8	12
35.1405	17	17	10	4	6	10	5	4	4	5	5	4	2	1	4	4	4	8	5	7	13
35.1651	10	12	11	7	7	7	5	9	9	2	12	9	7	3	9	6	4	5	14	5	8
35.1897	18	5	9	7	13	5	8	4	7	12	4	4	5	2	4	5	5	2	5	12	5
35.2143	8	18	10	6	10	9	4	6	7	3	4	5	4	4	1	10	4	5	6	12	11
35.2389	10	12	11	8	5	8	3	10	8	3	6	10	6	3	4	3	2	4	11	6	6
35.2635	8	13	11	9	13	6	9	7	4	3	5	8	3	7	4	6	10	6	6	9	10
35.2881	9	9	13	6	5	7	5	7	8	5	4	8	1	1	4	4	6	11	8	11	9
35.3127	10	11	9	12	5	6	3	6	12	5	2	10	3	7	1	5	8	5	12	8	8
35.3373	3	16	10	7	11	10	8	7	1	5	3	3	4	3	4	10	9	7	8	9	8
35.3619	6	13	12	10	10	5	7	7	6	4	2	4	3	0	4	8	2	4	10	6	9
35.3864	13	8	8	6	9	8	9	3	3	2	6	6	8	7	2	8	7	3	10	7	14
35.411	17	14	13	17	4	5	4	6	5	4	6	6	1	1	3	3	5	7	8	6	5
35.4356	6	8	14	21	9	8	7	2	1	2	3	6	1	4	2	7	11	5	5	9	11
35.4602	13	13	15	11	11	5	7	9	5	5	4	4	4	4	2	5	5	7	11	5	13
35.4848	11	8	14	6	4	7	8	8	5	4	4	9	1	5	4	10	7	4	3	6	8
35.5094	9	13	8	10	12	10	2	2	4	3	1	4	3	6	5	7	7	8	8	10	5
35.534	10	9	13	9	5	8	5	8	1	8	7	5	5	4	6	4	4	5	6	5	6
35.5586	14	10	8	3	10	7	3	6	4	7	8	2	4	2	5	9	17	3	11	10	7
35.5832	15	9	8	5	6	9	4	8	6	7	6	5	5	4	4	3	10	6	5	5	10
35.6078	12	10	12	8	9	5	3	9	7	6	2	3	3	4	6	7	8	4	2	8	10
35.6324	11	7	8	11	6	11	9	5	4	4	7	8	3	2	3	4	3	6	7	10	6
35.657	14	12	11	6	12	6	4	7	4	5	8	3	1	4	8	6	9	3	4	6	12
35.6815	11	16	12	7	4	7	3	6	5	3	6	3	5	0	4	2	5	5	8	10	10
35.7061	7	8	14	13	6	15	8	7	9	3	2	5	2	3	4	4	3	5	4	8	7
35.7307	4	6	7	8	4	4	3	4	2	7	6	4	2	4	7	7	2	5	11	5	5
35.7553	7	10	9	5	6	8	3	9	9	5	7	6	1	4	1	5	7	6	6	4	7
35.7799	9	10	8	3	4	3	7	6	8	4	4	4	3	6	3	10	8	5	7	8	9
35.8045	9	9	15	3	9	6	7	7	3	2	1	5	3	5	2	6	3	8	4	10	7
35.8291	13	8	10	8	13	10	6	4	5	5	5	6	2	6	2	3	3	5	6	10	6
35.8537	5	10	8	6	10	5	9	5	5	7	5	4	1	2	3	8	5	5	7	11	5
35.8783	12	11	17	5	10	7	4	9	5	6	3	3	6	3	3	0	11	6	5	6	4
35.9029	9	12	13	9	10	2	13	7	1	6	2	5	4	1	2	6	6	7	6	7	9
35.9275	10	11	15	6	6	4	5	3	4	5	5	3	2	0	3	5	5	10	8	7	5
35.952	13	10	13	3	4	5	3	9	0	3	9	4	6	5	2	11	6	8	5	9	7
35.9766	13	6	6	11	8	7	8	5	6	6	3	5	2	5	2	11	2	10	6	9	9
36.0012	8	8	8	7	4	6	11	5	4	1	3	4	1	5	2	5	4	6	7	9	4
36.0258	7	5	13	8	9	4	6	3	7	3	5	6	2	1	4	5	2	4	4	4	5
36.0504	12	18	8	4	6	7	13	5	4	3	6	8	3	4	3	4	4	5	8	9	5
36.075	9	11	10	11	7	5	4	1	3	0	5	7	2	4	0	4	7	6	6	6	7
36.0996	12	15	7	8	10	6	4	8	8	2	4	6	5	6	3	6	8	7	8	8	11
36.1242	5	8	7	10	6	5	4	7	6	5	6	4	5	2	6	10	5	2	10	3	9
36.1488	7	14	8	6	5	8	2	6	5	7	8	5	1	3	2	8	4	4	10	9	5
36.1734	9	5	13	5	3	4	5	3	9	2	7	7	1	3	4	2	8	9	9	5	10
36.198	11	17	5	9	15	5	0	5	4	1	5	1	2	1	2	3	3	9	4	6	7
36.2225	10	13	11	13	6	5	2	7	7	4	4	4	3	3	3	7	5	6	5	9	6
36.2471	10	8	10	7	6	8	2	3	4	2	4	3	4	3	1	7	3	2	8	3	7
36.2717	5	9	5	4	6	8	11	1	2	5	2	1	4	1	2	6	5	3	5	8	11
36.2963	7	5	12	8	10	7	6	7	2	2	2	4	1	7	2	3	5	6	11	6	6
36.3209	14	12	5	12	12	8	5	6	6	4	4	5	6	1	2	4	4	5	7	8	4
36.3455	14	13	10	5	3	7	4	6	5	5	3	3	7	2	4	4	2	6	3	6	6
36.3701	13	7	6	5	6	6	1	6	8	2	2	6	3	5	2	6	9	1	5	6	3
36.3947	16	10	9	8	8	6	5	2	6	5	5	2	2	1	7	7	8	10	8	13	9
36.4193	8	10	8	7	4	8	7	5	4	1	0	3	7	2	2	5	5	3	4	6	3
36.4439	8	12	6	4	4	6	3	6	6	5	3	3	2	5	1	3	1	10	12	6	4
36.4685	5	5	8	8	4	5	4	4	1	3	2	5	1	2	5	2	6	2	10	7	15
36.493	5	15	6	7	7	5	2	5	4	4	4	3	4	1	0	8	6	4	5	6	4
36.5176	10	8	7	9	6	8	5	2	4	3	6	4	5	3	1	6	4	9	10	8	4
36.5422	7	8	8	7	5	4	3	3	3	5	5	5	2	2	4	2	6	2	5	3	10
36.5668	3	8	14	4	5	6	8	3	1	7	4	5	3	7	4	0	1	2	5	10	8
36.5914	7	10	7	9	10	8	6	5	6	2	6	1	7	3	5	4	5	2	3	5	2
36.616	7	6	7	8	5	6	3	8	3	1	5	3	4	3	5	5	3	8	12	8	2
36.6406	12	8	9	9	7	5	4	4	7	1	5	6	3	6	1	4	6	6	9	6	8
36.6652	4	6	13	10	3	10	7	4	4	6	3	3	0	3	2	4	3	3	6	7	2
36.6898	5	10	5	5	4	5	5	2	4	1	4	4	1	3	5	6	5	7	10	7	4
36.7144	4	5	3	8	6	7	0	3	5	5	4	3	0	5	2	5	7	3	9	3	7
36.739	4	9	3	10	6	4	3	1	7	4	2	4	1	3	2	5	8	5	6	5	7
36.7635	7	7	6	8	4	10	5	6	4	5	4	2	1	0	4	2	3	3	9	0	8
36.7881	4	10	10	6	5	12	3	6	5	3	4	0	2	4	2	7	4	5	2	6	9
36.8127	5	4	7	8	4	3	5	9	1	3	3	3	3	1	1	4	4	4	2	5	7
36.8373	9	9	9	8	8	6	2	3	4	3	2	8	2	4	5	7	10	1	4	8	5
36.8619	8	12	7	6	4	5	2	5	4	1	6	2	3	3	2	5	6	2	6	4	6
36.8865	8	10	10	5	6	4	4	2	7	1	3	1	3	4	4	3	10	1	9	7	5
36.9111	14	9	3	4	5	5	7	5	1	3	4	5	3	1	4	0	3	3	9	7	6
36.9357	12	8	13	5	2	5	5	3	2	5	6	2	4	2	5	2	5	3	4	7	5
36.9603	9	9	5	2	2	2	3	2	6	3	3	4	3	4	7	2	1	3	6	3	8
36.9849	6	6	10	3	3	5	6	6	3	2	2	2	2	3	5	1	0	3	4	6	2
37.0095	6	10	8	7	4	5	6	2	1	4	3	5	4	1	3	5	1	5	3	4	5
37.034	12	6	6	4	2	9	3	7	8	5	4	2	5	4	0	4	5	3	6	5	4
37.0586	4	5	16	4	9	8	8	5	8	5	8	2	1	3	2	4	4	9	2	9	5
37.0832	3	6	10	8	10	9	3	4	11	1	3	3	2	1	1	4	5	5	6	8	11
37.1078	6	5	16	4	9	9	4	2	9	0	7	3	4	3	3	4	5	7	7	5	3
37.1324	10	11	7	5	3	3	4	0	6	0	6	4	0	2	2	2	2	3	8	8	6
37.157	6	6	8	5	6	8	7	7	4	6	2	4	0	1	6	4	2	5	7	6	1
37.1816	7	5	7	7	6	4	8	5	1	1	4	2	0	1	1	8	7	5	6	3	6
37.2062	13	7	8	1	3	3	4	2	2	5	2	3	3	3	2	3	5	2	6	7	5
37.2308	9	5	9	8	5	7	3	3	0	2	5	2	3	0	1	2	1	5	8	0	4
37.2554	8	6	12	4	8	4	3	6	5	4	6	1	5	1	2	2	2	2	5	7	7
37.28	9	9	8	5	4	4	6	2	3	1	0	3	3	5	0	3	2	2	5	6	6
37.3045	7	1	6	7	6	6	3	3	3	6	5	2	1	2	1	4	5	4	6	3	4
37.3291	12	8	9	5	3	4	6	3	7	6	6	2	3	5	3	3	2	6	1	6	6
37.3537	8	4	5	6	4	6	3	0	7	5	2	3	3	2	5	3	4	3	3	7	1
37.3783	8	12	13	9	7	6	4	5	7	4	2	1	2	1	2	1	2	2	9	5	1
37.4029	12	7	4	2	3	4	2	4	3	2	0	3	2	3	1	9	8	2	2	8	5
37.4275	11	5	9	10	0	6	4	1	3	4	3	3	3	2	2	3	6	6	3	4	7
37.4521	9	7	12	4	5	6	1	4	3	4	5	1	1	3	2	3	5	5	3	7	4
37.4767	7	6	11	8	2	7	2	8	3	3	2	2	2	3	2	3	8	9	10	3	6
37.5013	7	4	5	6	6	3	0	6	2	4	3	6	2	3	1	3	6	2	3	3	5
37.5259	5	8	3	6	9	6	5	4	3	6	6	0	4	2	1	0	5	6	5	8	1
37.5505	9	7	11	7	2	6	5	5	4	5	1	8	4	4	3	4	4	3	6	6	8
37.575	7	8	8	3	4	8	4	6	1	2	4	0	2	3	3	3	5	4	4	4	8
37.5996	5	11	6	4	6	5	3	5	2	5	3	2	1	1	2	4	3	2	3	3	7
37.6242	5	6	1	5	6	9	4	4	2	1	2	7	1	3	3	2	7	4	3	4	12
37.6488	8	10	4	1	3	5	3	6	4	2	4	2	2	3	2	2	5	2	5	3	5
37.6734	12	6	3	4	5	5	4	2	5	2	7	1	2	6	4	2	5	3	6	7	8
37.698	6	6	3	3	4	7	2	6	3	6	5	1	2	3	1	2	3	4	6	9	7
37.7226	14	6	5	9	2	4	4	3	5	6	5	2	1	3	2	2	4	7	4	2	2
37.7472	2	12	8	6	4	4	3	5	6	4	2	2	3	2	2	7	4	4	7	4	3
37.7718	6	8	6	2	7	2	3	0	5	5	4	2	1	1	3	3	3	3	6	6	7
37.7964	5	4	9	7	2	4	5	4	5	3	3	4	2	5	2	2	1	3	6	7	8
37.821	5	10	3	5	2	8	4	1	4	1	3	3	1	3	2	1	3	0	5	3	5
37.8455	8	6	6	5	5	5	6	1	0	1	2	6	3	1	2	3	6	2	8	6	4
37.8701	4	8	9	4	9	7	2	4	2	2	0	3	1	3	3	2	4	6	5	4	6
37.8947	6	6	8	4	4	3	5	2	2	2	4	1	2	2	1	2	5	2	10	1	3
37.9193	2	6	4	4	3	6	5	2	5	4	1	4	3	1	3	2	5	2	3	3	4
37.9439	8	4	10	4	3	2	6	5	2	3	3	1	1	2	0	4	3	1	6	5	6
37.9685	9	3	8	6	5	2	3	4	3	2	3	5	2	2	1	5	3	2	6	4	8
37.9931	7	2	6	4	3	7	6	2	4	1	2	1	4	2	1	5	3	2	9	1	6
38.0177	7	11	7	4	3	3	3	4	1	3	5	5	3	5	0	3	6	3	3	5	10
38.0423	5	2	4	3	3	0	5	3	4	1	2	3	1	0	3	4	2	5	0	5	10
38.0669	6	5	5	11	4	5	3	3	2	2	5	5	3	3	2	3	4	2	7	5	12
38.0915	10	7	8	5	7	5	5	1	3	1	1	4	1	2	1	1	2	5	6	5	6
38.1161	3	7	9	1	5	6	2	1	1	5	2	2	2	2	1	2	4	5	6	3	5
38.1406	12	12	6	7	4	4	1	3	4	4	0	4	1	3	3	2	3	3	3	7	9
38.1652	6	7	7	8	5	1	4	6	3	2	2	3	1	6	4	5	2	3	3	4	9
38.1898	2	8	9	10	2	3	1	3	3	2	3	2	2	3	1	7	6	4	4	2	2
38.2144	9	1	8	6	4	10	1	8	0	1	2	3	2	2	3	6	1	4	2	4	2
38.239	1	3	2	6	3	4	0	6	3	6	0	3	0	2	3	5	3	5	4	5	3
38.2636	8	14	5	4	0	4	2	1	1	6	2	3	0	2	1	2	1	3	7	3	6
38.2882	6	4	3	2	6	5	7	3	3	2	2	2	3	2	2	3	4	3	2	4	1
38.3128	3	6	6	0	2	2	5	1	0	5	2	1	0	0	2	3	2	2	4	8	1
38.3374	7	6	3	2	3	7	4	4	2	3	3	3	3	2	3	4	2	6	2	3	4
38.362	9	9	1	4	5	5	4	0	5	3	1	0	2	1	1	4	5	1	3	1	0
38.3866	7	5	4	2	5	1	2	2	5	2	1	5	2	4	3	1	2	5	8	5	2
38.4111	7	10	5	2	6	2	1	2	5	4	7	3	3	1	1	4	4	5	2	7	8
38.4357	5	7	4	3	1	8	3	2	11	2	4	1	3	1	2	4	2	2	5	5	5
38.4603	3	3	6	8	5	5	5	2	2	4	4	3	3	2	4	1	5	5	2	8	5
38.4849	6	11	8	7	3	4	5	2	5	1	1	2	2	3	2	1	4	3	4	3	5
38.5095	3	9	6	6	4	6	5	4	2	3	4	1	1	0	1	4	2	2	6	4	4
38.5341	7	8	7	3	5	1	4	5	3	3	4	3	5	1	3	1	4	3	6	2	3
38.5587	5	8	3	1	6	6	4	5	2	3	1	3	0	0	2	3	2	6	4	3	4
38.5833	2	4	2	5	1	6	0	5	1	4	1	3	5	2	6	1	3	1	9	7	8
38.6079	6	3	6	4	8	1	4	1	1	4	2	1	2	1	4	2	2	3	4	6	3
38.6325	8	5	8	7	5	8	4	2	1	1	2	2	1	2	1	3	2	7	7	5	4
38.6571	6	7	9	4	5	5	2	3	4	3	4	4	0	2	2	4	6	2	1	3	6
38.6816	6	6	5	3	5	5	6	5	4	2	2	2	2	2	2	2	1	3	4	6	6
38.7062	4	10	5	9	4	1	4	4	2	3	3	3	5	3	0	4	2	4	4	4	0
38.7308	12	7	7	3	5	3	5	1	3	1	4	3	1	2	3	1	4	3	1	4	3
38.7554	4	3	7	7	5	0	0	0	3	3	1	1	1	2	2	2	3	5	5	2	3
38.78	7	13	8	5	2	5	0	1	1	2	2	1	2	2	4	4	2	1	6	5	4
38.8046	1	8	2	3	3	0	4	7	3	3	5	3	2	2	0	3	3	5	2	4	1
38.8292	5	2	8	3	6	2	5	5	5	0	2	1	3	2	4	4	4	4	5	6	2
38.8538	6	4	11	4	7	5	3	1	2	2	2	7	2	3	3	7	3	3	8	3	4
38.8784	10	3	3	4	3	4	0	3	3	0	4	4	0	0	2	7	4	2	2	5	2
38.903	3	5	6	1	2	3	0	3	2	7	0	2	1	0	1	3	1	2	1	2	1
38.9276	8	5	4	5	4	5	1	0	4	1	4	2	2	5	1	2	1	3	3	2	3
38.9521	4	9	4	0	4	2	5	2	2	2	1	3	3	0	1	1	2	1	1	3	6
38.9767	8	8	7	5	3	3	3	5	2	5	2	5	1	3	0	2	2	4	2	5	5
39.0013	3	2	5	1	5	2	3	3	1	1	1	1	0	0	1	6	2	4	3	1	5
39.0259	5	0	2	7	3	7	6	2	3	2	1	3	2	0	2	1	4	8	1	1	3
39.0505	5	4	4	1	0	4	5	2	2	3	1	3	0	0	2	2	4	2	5	3	4
39.0751	7	4	8	4	3	5	6	4	3	1	4	2	2	0	0	3	2	2	4	2	0
39.0997	5	7	4	3	5	5	3	6	1	2	1	1	0	1	1	1	1	1	2	4	7
39.1243	9	8	3	3	4	9	0	2	5	2	2	2	3	1	1	4	2	2	4	3	2
39.1489	7	5	2	3	1	4	2	1	4	3	4	3	3	1	0	2	4	2	4	2	5
39.1735	4	6	5	3	6	1	3	3	3	4	3	4	1	1	3	4	4	2	3	2	6
39.1981	4	5	4	3	3	2	1	5	4	0	1	6	2	6	4	1	0	2	3	9	4
39.2226	5	8	5	3	4	1	3	1	0	3	2	2	1	1	0	2	2	0	5	2	4
39.2472	6	3	5	3	5	6	4	1	4	1	0	2	2	2	3	1	2	2	2	5	3
39.2718	7	5	5	4	4	4	2	1	5	1	1	3	1	1	0	3	4	5	5	1	5
39.2964	8	7	2	2	8	5	0	1	2	2	0	3	1	1	1	2	4	6	2	1	1
39.321	2	6	3	5	8	2	5	0	5	1	0	3	1	2	0	3	3	2	2	5	5
39.3456	6	1	6	2	6	7	1	1	2	2	1	4	0	1	0	5	1	4	2	4	2
39.3702	1	4	3	4	4	2	3	6	1	0	0	1	1	1	0	4	2	2	3	3	2
39.3948	6	4	3	4	5	8	1	1	2	7	3	3	3	2	0	2	3	1	4	5	2
39.4194	9	11	4	3	3	6	0	3	3	2	4	1	1	0	4	2	2	5	3	5	3
39.444	6	2	3	6	6	3	2	0	2	1	2	0	2	3	2	1	3	3	4	3	3
39.4686	5	2	3	3	2	4	1	1	4	4	3	1	0	0	2	2	1	0	1	2	2
39.4931	8	2	6	4	3	5	2	3	1	1	1	3	1	1	1	4	2	0	4	6	0
39.5177	5	4	5	1	1	5	1	3	2	2	0	3	1	1	4	3	2	3	3	5	4
39.5423	5	5	6	3	2	3	1	3	2	1	2	0	2	1	2	3	3	5	1	5	2
39.5669	2	3	2	2	5	3	6	2	1	1	1	1	2	0	1	2	2	1	4	2	2
39.5915	5	7	3	3	3	9	2	2	6	2	2	2	0	3	4	2	2	1	2	3	2
39.6161	4	3	2	3	4	2	4	1	3	2	2	2	0	0	2	0	3	1	3	5	2
39.6407	5	6	3	4	2	5	1	2	2	2	2	4	2	1	2	1	2	5	5	3	4
39.6653	1	3	7	4	2	3	1	0	7	3	3	2	0	0	1	1	2	2	0	0	4
39.6899	5	7	8	4	2	5	3	2	2	2	4	0	0	0	3	2	0	0	6	3	5
39.7145	2	8	4	2	6	3	6	1	3	3	1	3	6	0	1	2	1	1	1	5	3
39.7391	6	8	5	2	6	1	3	1	6	4	2	2	3	0	2	2	3	3	3	4	2
39.7636	2	7	3	3	2	4	4	2	1	2	1	1	2	1	1	2	1	4	2	1	2
39.7882	3	3	8	3	1	3	1	5	0	1	2	0	4	1	0	3	4	3	3	5	6
39.8128	4	7	3	2	0	3	3	2	2	0	2	2	1	1	2	4	1	1	1	2	3
39.8374	6	3	4	2	4	4	2	3	3	3	2	2	1	1	3	2	5	2	5	2	1
39.862	8	4	4	4	8	4	2	1	5	3	3	1	2	1	0	2	1	1	2	3	3
39.8866	1	5	2	3	3	3	0	5	3	2	1	4	1	3	2	2	6	1	1	6	4
39.9112	3	3	5	3	4	1	0	3	1	2	1	1	3	2	2	1	3	0	6	5	3
39.9358	5	10	4	4	1	2	1	1	1	4	1	3	1	1	1	5	1	2	1	6	5
39.9604	5	8	4	4	1	3	3	4	3	2	1	5	0	2	1	0	2	2	1	2	2
39.985	9	5	4	1	1	2	3	3	5	0	1	2	3	1	0	1	4	1	2	0	3
40.0096	6	1	6	4	2	3	3	2	2	2	1	0	0	2	0	2	3	2	2	4	5
40.0341	1	3	1	1	7	4	2	1	1	1	3	1	2	4	3	4	1	2	3	5	2
40.0587	5	4	1	3	2	3	5	3	1	1	1	2	2	2	1	5	2	0	1	1	2
40.0833	4	4	3	2	1	2	4	3	1	1	2	2	1	3	2	2	4	3	6	1	0
40.1079	1	3	4	3	4	3	1	1	1	1	0	4	2	1	2	1	0	2	2	5	2
40.1325	4	12	6	2	1	2	0	1	2	2	1	2	0	1	1	1	0	5	1	4	3
40.1571	5	6	3	1	4	1	3	1	6	1	4	1	2	1	1	3	1	2	3	2	5
40.1817	6	4	4	1	0	1	1	3	1	2	2	2	2	4	1	2	4	4	3	2	2
40.2063	6	2	7	3	1	2	2	0	3	2	4	0	3	0	1	1	3	2	5	3	0
40.2309	5	4	3	5	1	3	2	1	4	2	1	3	0	1	2	3	1	2	2	4	4
40.2555	3	3	5	3	3	0	1	2	4	5	2	2	1	5	1	2	1	0	3	2	5
40.2801	5	0	3	2	2	4	4	0	3	4	4	2	0	1	1	4	4	1	2	5	4
40.3046	0	5	3	4	5	3	2	1	2	1	0	2	1	1	1	1	5	3	4	2	3
40.3292	1	3	1	2	1	4	1	0	2	2	2	3	3	2	1	1	2	1	2	2	2
40.3538	1	2	6	0	2	3	6	1	1	1	3	3	1	2	3	1	3	2	1	5	0
40.3784	4	3	5	2	3	6	1	1	1	0	2	1	0	0	1	1	5	3	5	2	3
40.403	5	5	3	0	2	2	2	3	3	1	0	0	2	3	2	1	0	0	2	3	3
40.4276	3	3	4	3	0	5	1	0	1	5	0	2	1	0	3	5	3	3	3	4	3
40.4522	4	4	5	1	1	3	3	2	2	0	4	2	3	1	1	2	4	0	1	1	1
40.4768	2	6	5	6	4	1	3	1	2	2	0	0	3	0	1	1	2	1	3	0	1
40.5014	6	3	1	4	3	6	1	5	1	1	1	1	0	2	1	2	2	1	2	4	5
40.526	3	3	2	1	3	2	2	2	3	1	1	2	1	0	1	3	3	2	0	2	2
40.5506	5	4	6	4	6	4	2	2	2	1	3	0	1	1	2	1	1	1	2	3	3
40.5752	5	1	4	6	2	6	3	2	3	2	0	1	3	0	2	4	1	0	3	4	0
40.5997	4	2	5	1	2	7	3	1	1	1	1	2	0	1	2	1	2	6	2	4	1
40.6243	4	5	2	2	1	5	2	0	2	2	1	1	1	2	1	1	3	0	4	1	2
40.6489	3	6	6	1	0	2	2	0	1	1	0	2	0	0	0	1	0	5	4	2	3
40.6735	5	6	4	2	1	4	3	3	3	0	0	3	3	3	1	1	3	1	1	4	1
40.6981	4	4	4	2	2	1	5	3	3	2	2	2	1	1	1	2	0	2	1	2	1
40.7227	4	1	1	3	2	3	1	1	3	2	3	1	3	2	1	3	3	2	2	3	1
40.7473	4	1	1	1	0	1	0	1	2	2	0	1	0	0	1	2	4	5	1	4	2
40.7719	5	4	2	3	4	1	5	1	2	2	1	0	3	1	4	1	3	1	3	2	4
40.7965	7	1	4	3	1	1	0	3	2	0	0	1	0	0	1	1	1	2	0	1	5
40.8211	7	2	2	2	6	4	0	3	0	1	1	0	1	2	0	3	3	3	4	5	3
40.8457	3	3	4	2	8	4	0	3	2	1	2	1	0	2	2	0	1	3	3	3	4
40.8702	2	4	3	2	5	1	2	1	4	0	2	2	0	0	1	3	3	1	4	3	2
40.8948	3	5	3	2	2	1	2	2	0	0	2	0	2	1	2	2	1	1	1	6	3
40.9194	1	3	1	4	6	3	3	3	0	0	2	3	2	0	1	2	1	1	2	1	2
40.944	3	5	1	2	2	0	2	0	0	1	3	2	0	2	0	2	6	1	6	4	4
40.9686	4	3	3	1	2	2	1	0	3	3	1	2	2	1	1	1	1	1	1	4	2
40.9932	3	3	4	0	2	5	2	3	0	2	1	2	1	2	2	4	8	2	1	3	2
41.0178	1	1	1	5	1	0	2	3	2	0	2	1	0	1	2	3	2	0	2	2	1
41.0424	2	1	5	2	3	0	1	3	1	0	0	1	1	1	3	1	2	4	4	3	3
41.067	4	0	3	4	4	4	0	2	4	2	4	0	1	0	0	2	3	6	1	4	1
41.0916	3	6	4	1	0	2	2	3	3	0	2	4	2	0	0	2	1	1	2	3	3
41.1162	0	4	2	5	4	3	1	1	2	2	0	1	0	1	0	3	1	2	3	5	4
41.1407	4	3	2	4	3	1	1	0	0	3	0	2	1	1	3	3	1	2	3	1	5
41.1653	2	4	3	1	3	2	1	3	0	0	0	1	0	1	4	0	1	1	5	3	3
41.1899	4	1	3	4	1	1	1	4	1	1	2	1	2	0	0	2	0	1	0	1	3
41.2145	2	5	6	1	8	7	2	3	0	1	5	0	0	2	2	3	2	2	0	0	1
41.2391	3	4	4	3	6	3	0	2	1	3	0	2	1	1	0	2	0	5	2	7	2
41.2637	4	5	2	2	2	0	0	1	1	1	2	2	1	1	2	4	1	1	1	2	4
41.2883	3	2	3	2	1	2	1	3	2	1	1	1	3	1	3	0	3	3	3	0	2
41.3129	6	5	3	5	4	0	0	2	1	1	0	1	1	2	0	2	3	1	3	3	3
41.3375	4	2	3	3	2	6	0	0	1	2	1	4	0	1	3	2	1	1	1	3	3
41.3621	4	2	6	6	3	4	0	1	0	1	0	1	1	1	0	0	1	1	2	2	3
41.3867	5	3	2	3	2	0	1	1	1	0	0	1	0	3	0	2	1	0	3	2	4
41.4112	4	1	3	5	0	1	0	0	1	3	1	5	3	2	1	1	0	1	1	2	2
41.4358	1	5	5	1	3	2	2	0	1	0	1	1	1	1	0	0	2	0	2	1	1
41.4604	3	4	1	1	1	0	1	1	2	0	2	2	1	0	0	0	2	0	2	2	3
41.485	4	1	3	1	1	3	2	3	2	1	1	2	1	2	1	2	1	2	1	2	2
41.5096	4	4	2	4	5	2	2	2	0	1	1	2	1	2	1	4	0	0	3	3	1
41.5342	5	2	2	1	2	1	1	2	1	1	2	0	2	2	1	1	3	0	5	3	1
41.5588	0	6	2	2	3	3	1	1	1	1	1	0	0	0	3	2	2	1	2	2	4
41.5834	2	4	3	2	2	2	2	1	2	0	1	0	3	0	2	3	0	2	1	3	0
41.608	4	1	4	3	2	1	2	3	2	0	1	2	1	0	0	2	4	2	3	2	4
41.6326	4	2	6	2	2	2	1	2	3	2	1	0	1	1	0	1	2	0	0	2	0
41.6572	4	1	6	1	1	3	0	0	3	1	1	1	1	0	2	2	1	0	3	0	1
41.6817	4	4	4	2	3	2	1	0	1	0	1	1	0	2	0	1	4	1	1	0	3
41.7063	3	5	0	0	3	0	0	3	2	0	1	0	1	0	2	1	2	3	3	2	3
41.7309	2	3	2	0	1	1	0	1	3	1	0	2	1	3	0	1	1	0	4	1	3
41.7555	3	7	2	3	1	1	0	1	3	0	1	1	2	0	0	2	1	2	2	2	3
41.7801	4	3	4	2	3	3	1	1	2	1	1	3	0	2	0	2	1	1	2	0	3
41.8047	4	2	4	4	3	1	0	2	1	0	0	3	1	1	0	0	0	3	1	2	3
41.8293	5	0	2	2	1	3	2	0	2	1	0	1	0	3	0	2	0	2	4	3	2
41.8539	3	2	2	1	1	0	1	2	2	1	3	0	0	1	0	2	3	2	0	3	0
41.8785	2	2	1	0	0	3	2	0	3	0	1	0	2	3	0	2	0	1	5	1	1
41.9031	3	2	2	2	0	0	1	1	1	1	0	0	1	1	1	2	2	1	2	2	1
41.9277	5	1	3	2	1	2	4	1	1	4	1	0	0	2	0	0	1	2	2	1	1
41.9522	1	5	4	3	1	3	0	0	2	1	3	0	0	1	0	4	1	1	0	0	0
41.9768	2	6	0	2	0	0	1	4	0	1	2	1	1	1	0	2	3	3	4	1	4
42.0014	4	5	1	0	5	3	0	2	0	0	1	1	1	1	0	1	0	2	1	2	1
42.026	3	5	2	4	2	4	2	0	3	3	2	0	0	1	0	1	1	1	2	2	1
42.0506	1	3	3	1	1	6	1	0	2	3	0	2	0	0	1	4	2	2	2	2	0
42.0752	4	3	0	3	1	3	2	1	0	0	1	1	0	0	1	0	2	4	2	3	1
42.0998	0	1	2	2	2	3	1	2	0	0	1	1	0	3	0	0	0	2	4	1	0
42.1244	2	4	1	3	5	0	2	7	0	0	0	1	0	0	0	3	2	0	1	1	2
42.149	3	0	2	2	2	1	0	0	0	0	1	1	1	0	0	4	1	1	0	0	1
42.1736	1	5	5	3	4	4	2	1	2	1	0	1	3	0	2	1	2	1	4	2	4
42.1982	2	3	4	2	0	1	2	1	0	0	0	1	1	0	2	3	1	2	3	1	0
42.2227	2	2	3	2	0	2	1	0	2	0	2	0	0	1	0	1	1	1	1	3	2
42.2473	3	3	2	2	3	1	1	1	0	0	2	1	0	0	1	1	1	0	3	2	1
42.2719	2	5	6	2	1	0	2	0	1	0	1	2	1	0	1	0	2	0	0	2	5
42.2965	1	1	1	6	1	0	3	1	0	0	2	2	0	0	0	2	4	0	0	0	3
42.3211	0	1	0	1	3	3	2	2	0	2	0	1	0	0	0	2	1	1	3	3	2
42.3457	4	1	6	0	1	1	2	1	2	0	2	2	1	0	2	2	2	2	1	2	2
42.3703	3	3	2	3	0	3	1	1	0	1	1	2	3	0	1	0	1	1	1	5	2
42.3949	1	5	3	1	2	1	0	0	1	0	0	0	0	0	1	0	0	3	0	1	1
42.4195	1	2	2	0	2	2	1	0	1	1	1	2	2	0	1	1	3	1	2	1	2
42.4441	1	0	6	0	1	0	1	4	1	1	0	2	1	0	1	2	2	2	0	1	2
42.4687	3	4	6	1	1	4	1	1	0	1	1	2	0	1	0	2	1	1	3	0	1
42.4932	5	6	1	5	2	0	1	2	0	0	0	1	1	0	1	0	0	1	1	3	3
42.5178	4	1	0	2	3	0	0	2	1	2	1	2	0	1	0	0	0	1	1	1	0
42.5424	5	2	0	0	4	2	2	0	2	1	1	1	2	0	1	1	2	0	2	2	1
42.567	0	0	1	1	0	1	0	0	1	0	0	0	2	0	0	3	0	2	1	0	1
42.5916	4	0	4	1	1	3	2	2	0	0	1	0	2	1	1	2	3	1	2	1	4
42.6162	2	5	1	1	2	3	0	0	2	2	2	0	0	1	0	2	4	0	3	0	0
42.6408	0	1	5	2	2	2	1	0	2	0	0	0	2	1	0	1	1	2	1	2	4
42.6654	6	5	2	1	3	2	0	0	1	2	0	1	2	4	1	3	0	1	2	3	1
42.69	3	0	2	3	1	3	2	1	0	0	1	0	0	1	1	1	0	0	1	1	3
42.7146	1	1	6	2	3	0	0	0	1	0	0	1	1	1	1	2	1	4	3	1	1
42.7392	4	2	3	3	3	1	0	0	2	1	1	1	0	0	0	1	0	0	0	4	2
42.7637	2	4	1	2	0	3	0	0	0	1	3	1	0	0	0	1	1	3	5	2	0
42.7883	1	3	2	2	1	1	2	1	2	2	1	1	0	1	1	0	1	1	2	0	2
42.8129	1	1	0	1	1	0	4	1	1	0	2	1	0	0	0	1	1	0	0	1	2
42.8375	2	1	1	2	2	1	3	1	2	0	1	0	0	1	1	2	2	2	4	3	1
42.8621	6	1	1	3	4	1	1	0	3	2	1	0	1	1	1	0	0	0	1	1	2
42.8867	2	2	2	1	1	4	2	0	3	1	2	0	0	1	1	5	0	0	1	2	2
42.9113	2	0	2	1	3	1	3	1	2	0	1	0	1	0	2	1	0	1	3	1	0
42.9359	0	3	2	2	1	2	1	0	0	0	1	0	0	2	0	3	0	1	1	3	1
42.9605	2	2	3	0	0	2	3	3	0	2	1	0	0	0	1	0	0	2	0	1	1
42.9851	3	3	5	0	1	2	1	0	0	0	3	2	1	0	1	0	4	0	1	1	1
43.0097	2	1	5	3	2	2	1	0	0	2	2	1	0	0	0	1	1	1	1	0	1
43.0343	4	3	3	3	2	3	1	3	2	0	1	1	1	0	0	1	1	0	2	0	2
43.0588	1	2	1	0	3	3	0	2	2	1	1	2	1	0	0	1	0	1	1	3	2
43.0834	3	2	0	1	3	0	1	0	0	1	1	0	0	1	2	0	3	1	1	1	1
43.108	0	2	3	2	3	0	1	1	2	1	0	2	0	0	1	0	0	1	1	1	4
43.1326	2	1	2	2	2	3	0	0	0	2	0	1	1	0	0	3	0	2	1	0	3
43.1572	1	0	0	1	2	0	3	1	0	2	1	1	0	2	0	0	2	1	2	2	1
43.1818	0	2	4	0	1	0	1	0	0	0	1	0	1	1	0	2	1	1	0	1	2
43.2064	0	6	0	2	0	0	1	1	1	0	0	0	0	2	0	1	0	1	0	0	1
43.231	3	2	2	5	2	1	1	2	4	2	0	1	0	0	1	2	0	0	2	2	2
43.2556	3	4	6	0	3	0	2	2	1	1	4	1	1	0	0	1	1	0	1	1	3
43.2802	1	0	3	1	3	1	2	2	4	2	0	0	1	2	1	1	0	4	2	1	2
43.3048	1	2	1	3	2	1	0	0	2	0	1	0	0	1	0	3	2	1	1	2	4
43.3293	2	0	2	0	0	1	0	1	1	2	1	0	0	1	0	1	1	2	4	0	1
43.3539	4	3	4	1	0	3	1	1	0	0	1	3	1	1	0	2	0	0	0	1	1
43.3785	1	1	3	1	1	2	2	2	1	1	0	2	0	0	0	1	1	2	2	2	3
43.4031	3	4	2	0	0	2	2	0	1	1	1	0	1	0	1	1	1	1	1	1	2
43.4277	2	3	1	1	1	4	2	4	1	3	2	1	0	0	1	3	2	0	1	1	4
43.4523	2	2	0	1	0	3	2	4	0	1	0	0	1	1	1	1	2	1	0	2	0
43.4769	1	2	2	2	0	2	0	0	2	0	3	1	0	2	2	2	4	2	2	1	3
43.5015	4	2	1	0	1	0	0	0	0	0	0	1	0	1	0	1	0	2	3	0	1
43.5261	2	1	2	0	0	2	1	0	1	0	1	0	1	0	0	1	3	2	3	2	1
43.5507	1	3	3	0	0	0	3	0	0	1	0	1	0	1	0	5	1	3	1	0	3
43.5753	2	1	1	1	1	0	2	1	1	1	0	2	1	1	0	1	0	1	1	1	3
43.5998	0	2	2	2	2	2	2	0	0	1	0	0	0	1	2	1	0	3	0	1	1
43.6244	2	1	1	1	4	2	0	1	3	0	2	0	1	0	0	2	1	2	1	1	2
43.649	2	1	2	1	1	2	0	0	0	2	0	0	0	0	2	0	0	0	3	0	1
43.6736	1	3	2	1	0	0	3	1	0	2	1	1	0	0	0	0	0	0	2	0	2
43.6982	1	1	0	3	1	2	3	1	1	0	0	0	0	1	0	0	2	0	0	2	2
43.7228	2	0	0	3	3	0	1	0	0	0	0	1	0	1	0	2	0	0	1	0	0
43.7474	0	2	2	3	3	1	1	0	1	0	1	0	0	1	0	0	2	0	2	2	1
43.772	1	5	1	1	0	4	1	3	3	1	0	1	0	0	0	2	0	1	0	3	1
43.7966	2	1	1	1	0	0	1	1	2	1	0	1	1	0	1	1	1	1	1	0	1
43.8212	2	1	0	4	2	2	2	4	1	0	2	0	0	1	1	2	2	0	1	2	1
43.8458	2	1	0	2	0	0	1	0	3	1	0	0	0	0	2	0	1	0	1	0	4
43.8703	3	2	2	0	1	1	1	2	0	2	1	3	0	0	0	2	0	1	0	1	1
43.8949	2	1	1	1	0	3	3	0	0	0	0	0	0	0	1	0	0	1	1	2	1
43.9195	1	0	1	1	0	3	0	0	2	0	2	0	0	0	1	0	1	1	0	1	2
43.9441	1	2	3	0	1	2	1	0	1	1	0	1	1	0	1	0	0	0	1	3	2
43.9687	2	3	2	0	0	2	0	0	0	0	1	1	0	1	0	0	0	0	1	0	1
43.9933	1	3	1	3	1	1	3	2	5	0	0	0	0	0	1	1	1	2	2	0	0
44.0179	3	2	2	0	1	1	0	0	2	0	1	1	0	0	1	0	0	1	1	1	4
44.0425	1	2	2	3	0	0	1	2	0	1	0	0	1	0	2	1	0	1	0	1	0
44.0671	0	3	3	0	0	0	1	0	2	1	0	0	1	2	2	0	2	0	2	2	0
44.0917	0	2	3	2	2	0	1	1	2	1	0	0	0	1	1	1	0	3	1	0	0
44.1163	1	2	1	0	2	0	1	0	0	0	2	1	0	0	4	2	0	0	1	3	3
44.1408	2	1	0	4	0	0	1	1	1	2	0	0	0	3	0	1	1	0	2	1	1
44.1654	2	0	1	0	3	1	3	0	1	1	0	0	0	1	1	0	1	0	3	1	0
44.19	1	3	0	3	1	1	0	0	0	0	2	0	0	0	1	1	0	1	0	2	0
44.2146	2	1	1	1	1	1	0	5	0	0	1	0	0	1	0	0	0	1	3	1	0
44.2392	1	3	2	0	0	2	1	1	2	1	0	3	0	0	1	2	0	2	1	2	0
44.2638	1	1	1	0	0	0	0	1	3	0	1	1	0	0	0	1	0	0	2	1	0
44.2884	0	3	3	3	0	2	2	1	1	0	1	1	1	1	0	2	1	1	1	4	2
44.313	0	3	1	0	2	2	0	1	1	0	0	0	0	0	0	0	3	0	1	1	0
44.3376	2	4	3	0	0	2	1	1	1	1	1	0	0	1	1	1	1	0	0	0	0
44.3622	1	3	0	1	3	1	1	0	1	0	2	1	0	0	0	0	1	0	2	0	0
44.3868	0	4	4	0	2	1	1	0	1	2	0	0	0	0	1	0	0	0	0	2	1
44.4113	6	2	1	0	0	2	0	3	1	0	2	0	0	2	0	0	1	1	1	0	1
44.4359	2	0	1	0	2	1	1	0	0	0	0	0	0	0	0	1	1	0	1	1	0
44.4605	3	1	1	2	2	0	0	0	2	1	0	0	0	0	0	0	0	0	1	2	0
44.4851	0	0	1	0	0	0	0	2	3	2	2	3	1	2	0	0	0	0	0	0	1
44.5097	3	1	1	1	1	2	0	1	0	2	0	0	0	1	0	0	1	1	0	1	1
44.5343	2	3	1	1	0	1	5	0	0	0	0	0	0	0	0	1	1	0	1	3	0
44.5589	0	1	1	2	0	2	0	1	0	1	1	1	0	1	1	0	2	0	1	1	2
44.5835	1	3	2	1	1	1	2	0	0	1	2	1	2	0	1	0	2	0	1	1	1
44.6081	3	1	1	0	1	2	1	0	1	0	2	0	2	0	0	0	1	1	1	3	0
44.6327	1	2	2	0	1	0	1	1	0	1	1	2	0	1	1	0	1	0	0	2	3
44.6573	4	3	3	1	0	5	2	1	4	1	1	0	0	0	0	0	1	2	0	0	1
44.6818	0	0	3	1	3	3	1	1	0	0	1	0	0	0	0	0	1	0	1	1	0
44.7064	2	3	0	0	3	1	0	0	0	0	0	0	0	1	0	1	1	0	0	3	0
44.731	0	1	1	6	2	2	0	3	0	1	1	1	0	1	0	2	3	0	0	1	0
44.7556	3	1	0	1	2	1	2	0	2	0	0	1	1	0	1	2	0	2	0	0	0
44.7802	1	0	2	1	1	0	0	1	1	0	0	0	0	0	1	0	0	1	2	5	0
44.8048	2	4	3	2	1	1	3	0	1	2	1	1	0	0	0	2	0	1	0	0	2
44.8294	0	0	1	2	0	0	1	0	0	0	2	1	0	0	1	1	0	3	0	0	1
44.854	3	2	2	1	1	1	2	2	0	1	1	0	1	0	1	0	0	1	1	0	2
44.8786	1	0	2	0	0	1	0	0	0	1	0	0	1	2	0	1	0	0	0	0	1
44.9032	2	1	0	0	1	3	0	0	0	2	0	2	1	0	0	0	0	2	0	0	1
44.9278	2	4	1	1	0	2	1	0	0	0	0	0	0	1	1	3	1	0	1	2	2
44.9523	0	3	0	0	0	1	0	0	1	0	0	1	0	1	0	1	0	1	1	3	2
44.9769	0	1	2	2	2	0	1	0	0	1	0	0	0	1	0	0	1	3	0	0	2
45.0015	1	0	1	3	4	2	1	1	1	0	0	0	0	0	0	1	1	1	1	0	0
45.0261	6	0	1	0	0	0	0	1	0	1	0	1	0	0	2	1	0	1	0	3	0
45.0507	3	2	3	1	0	3	1	3	0	1	0	2	1	0	1	0	1	0	1	1	2
45.0753	2	0	2	1	2	1	2	0	2	0	1	1	1	0	0	0	0	1	2	1	1
45.0999	3	1	0	1	0	1	1	1	0	0	2	0	1	1	0	0	0	0	0	1	1
45.1245	2	2	3	1	0	0	1	0	0	0	0	0	0	0	1	1	2	2	2	1	0
45.1491	2	2	2	0	1	0	0	1	0	0	1	1	1	1	0	0	0	0	2	1	0
45.1737	3	0	3	4	0	0	0	2	0	1	1	0	1	0	1	0	1	2	1	1	2
45.1983	1	1	2	1	1	1	1	0	1	0	0	2	0	0	0	0	0	1	1	0	1
45.2228	1	2	0	1	3	1	0	2	0	2	0	0	0	1	0	0	0	1	1	0	1
45.2474	0	0	0	3	1	1	2	0	1	1	1	0	3	0	0	0	0	0	2	0	0
45.272	0	0	1	1	1	0	0	1	1	1	1	0	1	0	0	0	1	0	0	2	2
45.2966	0	0	0	3	0	0	0	0	1	2	0	0	0	0	0	0	0	0	1	1	1
45.3212	1	2	2	1	2	0	0	1	2	2	0	1	2	0	0	1	0	1	1	2	5
45.3458	0	1	3	0	2	1	0	0	2	1	1	2	0	0	0	0	0	0	0	2	1
45.3704	1	1	0	1	0	1	0	1	0	0	2	0	0	0	0	0	0	2	3	0	1
45.395	2	1	0	0	0	1	1	1	0	0	1	1	0	1	1	1	0	0	0	0	1
45.4196	0	2	1	0	1	0	0	0	0	0	0	1	0	1	0	2	0	2	1	1	0
45.4442	2	3	1	0	0	1	2	1	0	0	0	0	0	2	0	0	2	0	0	0	0
45.4688	3	0	0	2	0	4	0	0	0	0	1	1	0	0	1	0	3	1	1	0	0
45.4933	0	2	0	1	0	1	2	1	0	2	0	0	0	0	1	0	0	0	0	2	0
45.5179	2	1	2	0	1	3	0	2	0	0	0	0	0	1	1	3	0	2	2	1	0
45.5425	2	2	2	0	1	0	0	1	1	1	1	1	1	0	1	0	0	0	1	1	0
45.5671	0	0	0	0	1	0	2	0	0	0	1	0	2	0	0	0	0	2	0	0	0
45.5917	3	0	3	0	1	0	0	3	0	1	0	0	0	1	0	0	2	0	1	0	1
45.6163	0	0	2	0	1	0	0	0	0	0	1	1	0	0	1	0	2	0	1	0	0
45.6409	3	3	0	0	0	2	0	0	0	0	0	0	0	0	0	0	0	0	2	1	0
45.6655	0	0	0	0	0	0	1	0	2	0	0	0	1	1	0	0	1	0	0	2	0
45.6901	4	1	2	1	1	1	0	0	0	0	0	0	0	0	0	0	0	2	1	0	0
45.7147	2	1	1	1	1	1	0	1	2	1	0	0	0	0	0	0	0	2	1	0	0
45.7393	0	0	2	1	1	0	1	1	0	1	2	0	0	0	1	0	1	0	0	0	1
45.7639	2	0	0	1	0	0	1	1	2	1	1	0	0	0	0	0	0	0	1	0	0
45.7884	0	1	3	4	1	0	1	1	0	1	0	0	0	0	0	1	0	0	0	2	0
45.813	2	2	2	1	3	1	0	1	2	0	0	0	0	0	0	0	3	0	3	0	1
45.8376	1	2	0	0	0	0	0	1	3	0	0	0	0	0	1	1	1	0	1	0	1
45.8622	0	3	1	1	0	0	1	1	2	1	0	1	1	0	2	0	1	0	1	1	2
45.8868	3	3	0	0	0	0	0	0	2	0	0	0	0	0	0	1	1	1	0	0	1
45.9114	2	1	1	3	1	1	1	1	2	0	0	0	0	1	1	0	0	1	0	3	1
45.936	2	0	2	0	1	0	0	0	1	0	1	0	0	0	0	0	0	0	0	0	1
45.9606	1	2	1	0	0	0	0	0	0	1	1	1	0	0	0	0	1	0	0	2	0
45.9852	2	1	1	0	0	0	1	0	1	0	1	0	0	0	0	2	0	0	0	1	0
46.0098	0	0	1	1	1	0	2	1	0	0	2	0	0	1	2	1	0	1	0	1	0
46.0344	3	1	2	1	1	1	0	1	1	1	1	1	0	1	0	1	0	1	0	1	1
46.0589	0	0	0	2	0	0	0	0	0	1	0	0	1	0	0	1	1	1	1	0	0
46.0835	4	1	0	1	0	0	1	0	0	0	0	0	1	0	1	1	0	2	0	0	3
46.1081	0	2	0	0	1	0	1	0	0	0	0	0	0	0	1	0	0	0	2	0	2
46.1327	2	0	2	0	0	0	1	0	0	0	0	0	1	0	1	2	1	0	1	0	0
46.1573	4	1	2	0	1	0	0	3	0	0	1	1	1	1	0	0	0	1	0	0	1
46.1819	1	2	1	0	0	0	0	0	0	0	0	0	2	0	0	0	0	1	3	0	1
46.2065	2	2	2	1	1	1	0	1	0	2	0	0	0	0	0	1	0	1	2	0	0
46.2311	0	2	1	0	2	2	1	1	0	0	0	1	1	0	0	0	1	0	1	0	0
46.2557	1	2	0	0	1	1	0	2	1	0	2	0	0	0	0	1	0	0	0	0	0
46.2803	2	1	1	1	1	0	1	1	0	2	0	1	0	0	0	1	1	0	1	0	0
46.3049	3	0	0	0	1	0	2	0	0	1	0	0	0	0	0	0	1	0	0	1	0
46.3294	2	1	0	1	0	2	1	2	0	0	1	1	0	0	0	0	0	2	2	1	0
46.354	0	1	1	0	1	1	1	0	2	0	0	0	0	0	0	0	1	1	0	0	1
46.3786	0	0	1	1	1	0	0	0	1	1	0	0	0	1	0	1	0	0	0	1	0
46.4032	1	3	1	0	0	2	0	0	0	0	0	0	0	1	0	0	0	2	0	0	0
46.4278	1	3	0	1	1	2	0	2	0	1	2	0	0	0	0	1	0	0	0	1	0
46.4524	0	4	0	1	0	0	1	0	0	0	0	1	0	0	0	0	1	0	0	0	1
46.477	1	0	0	1	0	0	1	1	0	1	2	0	0	0	0	0	0	0	1	1	0
46.5016	2	3	0	0	0	2	1	0	0	1	0	0	0	0	1	0	0	0	1	0	1
46.5262	1	2	4	1	1	2	0	0	1	2	0	0	2	0	1	0	0	1	0	0	0
46.5508	1	1	1	0	0	1	0	1	1	0	0	0	0	0	0	0	3	0	0	2	1
46.5754	3	2	0	0	2	2	0	0	1	1	1	1	0	0	1	0	0	0	0	0	0
46.5999	2	2	0	0	1	0	1	0	0	1	1	0	1	0	1	0	0	0	1	0	2
46.6245	1	1	2	0	0	1	0	0	0	0	1	0	0	1	0	0	0	1	1	3	1
46.6491	0	0	2	1	1	0	1	1	0	1	0	0	0	1	0	0	0	1	0	1	1
46.6737	1	0	1	0	0	0	0	0	1	0	1	0	0	0	0	0	1	1	1	0	1
46.6983	2	0	2	0	1	0	0	0	1	0	0	0	1	0	1	0	0	0	0	0	2
46.7229	0	1	2	3	3	0	0	0	2	1	0	0	0	0	0	0	0	1	1	4	0
46.7475	1	2	2	1	0	0	1	0	1	0	0	0	0	0	0	0	0	0	1	0	2
46.7721	2	0	1	1	0	1	0	0	0	0	0	0	2	0	1	1	2	0	1	1	1
46.7967	3	1	0	0	1	0	1	0	0	1	0	0	0	0	0	1	0	0	0	0	1
46.8213	3	1	0	1	0	1	0	0	2	0	0	0	1	0	1	2	0	0	0	1	1
46.8459	0	3	1	1	1	0	0	0	1	0	0	0	0	1	0	1	1	2	0	2	2
46.8704	1	1	2	0	0	0	0	2	0	0	1	2	0	0	0	0	1	0	0	1	0
46.895	0	0	1	1	0	0	3	0	0	1	0	0	0	0	0	1	0	0	0	1	1
46.9196	0	1	0	1	0	1	1	0	0	0	0	0	0	0	0	1	0	0	1	1	0
46.9442	0	0	0	0	1	2	0	0	0	1	0	0	0	0	0	1	1	0	1	0	1
46.9688	0	0	0	1	1	1	0	1	0	0	0	0	0	0	1	0	0	0	1	1	1
46.9934	1	0	1	1	1	1	0	0	1	0	2	0	0	0	1	1	0	2	1	2	0
47.018	2	1	1	1	0	1	0	0	2	1	0	2	1	0	0	0	2	0	1	1	1
47.0426	0	1	2	1	2	0	0	2	1	0	0	0	1	1	2	2	0	1	0	0	1
47.0672	1	1	0	1	3	1	2	0	0	0	0	0	0	0	3	3	0	0	0	0	1
47.0918	1	2	0	1	0	0	1	0	1	0	0	0	0	0	0	0	1	1	0	0	1
47.1164	1	1	3	0	0	0	0	0	0	0	0	1	0	0	1	1	0	0	0	0	0
47.1409	1	2	0	1	0	0	0	0	0	1	0	1	1	0	1	0	0	0	0	2	0
47.1655	1	1	3	0	1	1	0	0	0	1	1	1	0	0	0	0	0	0	1	0	1
47.1901	0	2	1	0	3	0	0	1	0	0	0	1	0	0	0	2	1	0	0	0	2
47.2147	3	1	0	0	0	0	0	0	0	0	0	1	0	0	0	0	0	3	2	1	1
47.2393	0	0	0	2	1	1	1	0	1	0	1	1	0	1	0	0	0	0	0	0	0
47.2639	0	1	1	1	0	0	0	0	0	0	1	0	0	0	1	1	1	0	2	0	0
47.2885	1	0	1	0	0	0	1	0	0	1	0	0	0	0	0	0	1	1	1	0	0
47.3131	0	1	0	1	0	0	0	0	1	0	0	1	1	0	0	1	0	0	0	1	0
47.3377	2	0	1	0	0	1	0	2	0	0	0	2	0	0	1	0	1	0	2	0	1
47.3623	0	0	0	0	1	1	0	1	1	1	0	0	0	0	1	0	0	1	0	2	0
47.3869	3	0	1	1	1	0	1	0	0	0	1	1	0	0	0	0	0	0	0	1	2
47.4114	3	1	2	0	1	0	1	0	0	0	1	1	0	0	0	1	1	1	0	1	0
47.436	0	2	2	0	0	0	0	1	0	0	1	0	0	0	0	1	0	0	0	1	0
47.4606	0	1	0	0	0	0	2	2	0	0	0	0	1	1	1	1	0	0	0	1	0
47.4852	1	1	1	0	0	1	0	0	0	0	0	0	0	0	0	0	0	1	0	1	1
47.5098	0	1	2	0	1	2	0	0	0	2	1	0	1	0	0	0	0	2	1	0	0
47.5344	1	2	1	2	0	1	1	1	1	1	0	1	1	0	0	0	1	2	1	2	0
47.559	2	1	1	1	0	0	1	1	0	0	0	1	1	0	2	2	1	0	1	1	2
47.5836	1	1	1	0	1	0	1	1	0	0	0	0	0	0	0	1	0	1	2	1	1
47.6082	1	0	0	0	0	1	1	0	1	0	0	1	0	1	0	0	0	0	0	1	0
47.6328	0	0	0	0	0	2	0	0	0	0	0	0	0	1	0	0	1	0	0	0	2
47.6574	0	1	0	0	0	1	0	1	0	0	0	1	0	0	0	1	1	1	2	0	2
47.6819	2	0	0	1	1	1	1	0	1	0	0	0	0	0	0	0	0	1	1	0	0
47.7065	2	0	1	0	1	0	0	0	1	0	0	0	1	1	0	1	1	0	0	0	0
47.7311	0	2	1	1	1	0	0	0	0	1	0	0	0	0	0	0	1	0	0	0	1
47.7557	0	1	0	0	2	0	0	1	2	1	0	0	0	0	0	0	0	0	1	1	0
47.7803	2	0	1	0	1	0	0	0	1	1	0	0	0	0	0	0	1	1	2	0	0
47.8049	1	0	2	1	0	0	0	0	0	0	0	0	0	0	1	0	0	0	0	0	1
47.8295	0	1	0	0	1	1	0	0	0	0	0	0	0	0	0	0	1	0	1	1	2
47.8541	0	0	1	0	1	0	1	0	1	0	0	1	0	0	0	1	0	1	0	1	0
47.8787	0	0	1	0	1	0	0	0	0	0	0	0	0	0	0	0	1	0	0	1	0
47.9033	1	1	0	1	0	1	0	1	1	0	1	0	1	0	1	0	1	0	1	0	1
47.9279	3	0	1	2	0	1	0	1	1	0	1	0	0	0	0	0	0	1	0	0	0
47.9524	0	3	1	1	0	0	1	0	0	0	0	1	0	0	0	1	1	0	1	0	0
47.977	0	1	1	2	1	0	1	0	1	0	0	0	0	0	0	0	0	0	1	0	0
48.0016	0	0	1	0	0	0	0	1	2	0	0	0	1	0	0	2	0	1	0	0	0
48.0262	0	1	0	0	0	0	0	2	1	0	0	0	0	0	0	0	0	0	2	0	0
48.0508	1	1	0	0	1	0	0	2	0	0	0	0	1	0	0	1	0	0	0	0	0
48.0754	1	0	1	2	0	0	0	1	0	0	0	0	0	0	0	0	0	1	1	1	0
48.1	0	1	2	0	0	0	0	0	0	1	0	0	1	0	0	0	0	1	0	1	1
48.1246	1	1	1	1	0	2	2	0	0	1	0	0	0	1	0	0	0	0	0	1	0
48.1492	1	0	0	1	1	0	0	0	2	0	0	2	0	0	0	0	0	0	1	1	1
48.1738	1	1	1	0	1	0	2	0	0	0	0	0	1	0	2	0	0	0	2	0	0
48.1984	0	1	0	1	1	0	1	0	0	3	0	2	0	0	0	0	1	1	0	1	0
48.223	0	0	0	1	1	0	0	0	1	0	0	1	0	0	0	0	0	1	2	1	2
48.2475	1	0	1	0	0	0	0	1	1	0	0	0	0	0	1	0	0	0	0	0	0
48.2721	0	1	0	0	0	1	1	0	0	0	0	0	0	0	0	1	1	0	0	1	0
48.2967	1	0	0	0	0	0	0	0	0	0	0	0	0	0	0	0	0	0	0	0	1
48.3213	0	0	1	0	0	0	0	1	0	0	0	0	0	1	0	0	1	0	0	1	0
48.3459	0	1	2	0	0	0	1	2	0	0	0	0	0	0	0	0	0	0	0	0	1
48.3705	1	2	0	0	0	0	0	1	0	0	0	0	0	0	0	0	3	0	1	1	0
48.3951	0	1	1	0	1	1	0	0	0	0	0	0	0	1	0	0	0	0	1	1	1
48.4197	0	0	0	1	0	0	0	0	0	0	0	1	0	2	0	2	0	1	0	0	1
48.4443	0	1	0	1	1	1	0	0	0	1	0	1	0	0	0	1	2	1	1	0	0
48.4689	0	0	0	1	1	0	0	0	1	1	0	0	0	1	2	0	1	0	1	0	1
48.4935	2	0	0	0	1	2	0	1	0	0	0	0	0	0	2	0	0	0	0	0	0
48.518	0	1	1	2	1	0	1	0	1	0	0	0	0	0	0	1	0	0	1	2	0
48.5426	0	1	1	0	0	0	0	1	0	2	0	0	0	0	0	0	0	0	0	0	1
48.5672	1	0	0	0	1	1	1	0	1	0	0	0	0	0	0	0	0	0	0	0	0
48.5918	1	2	1	1	1	1	0	0	0	1	0	0	0	0	0	1	2	0	0	0	1
48.6164	0	0	2	0	1	0	0	0	0	0	0	0	1	1	0	0	0	0	0	0	1
48.641	1	0	2	0	0	0	0	0	1	1	0	0	0	0	0	0	0	0	1	1	2
48.6656	0	0	2	1	1	0	0	0	0	0	0	0	0	0	0	0	0	0	0	0	0
48.6902	2	0	0	3	0	1	1	0	0	0	0	0	0	0	0	0	0	0	0	0	1
48.7148	0	1	1	0	0	0	1	0	1	0	0	1	2	0	0	1	0	0	1	0	0
48.7394	0	0	0	0	0	0	0	0	0	0	0	0	0	0	0	0	0	0	0	0	0
48.764	0	0	0	1	0	0	1	0	1	0	0	0	0	1	0	1	0	0	0	0	0
48.7885	1	0	1	1	1	0	0	0	0	0	1	0	0	0	0	0	0	0	0	0	0
48.8131	0	0	0	0	0	1	0	0	0	0	0	0	0	0	0	0	0	0	0	2	1
48.8377	2	2	0	0	0	0	1	0	0	0	1	0	0	0	0	0	0	0	1	1	0
48.8623	2	0	0	1	1	0	0	0	0	0	0	0	0	0	0	2	1	0	0	0	1
48.8869	0	1	1	1	0	0	0	0	1	0	0	0	0	0	0	2	1	0	1	0	1
48.9115	2	0	1	1	0	0	0	1	0	0	0	0	0	0	0	0	0	0	0	0	0
48.9361	0	0	1	0	0	0	1	0	0	0	0	0	0	0	0	0	0	0	0	1	1
48.9607	3	0	1	2	1	0	0	2	0	0	0	0	0	0	0	0	0	0	3	0	0
48.9853	3	0	2	0	0	0	0	0	0	0	0	0	0	0	0	1	0	2	1	0	0
49.0099	1	1	0	0	1	0	1	0	1	0	0	0	0	0	0	0	0	1	0	0	0
49.0345	0	0	0	0	0	0	0	1	0	0	0	1	0	0	1	1	0	0	0	0	1
49.059	0	0	2	0	2	0	1	0	0	0	0	0	0	0	0	0	0	0	2	0	1
49.0836	1	0	1	1	0	1	2	0	0	0	0	0	0	0	0	0	0	0	0	0	0
49.1082	1	0	0	2	0	2	2	0	0	0	0	0	0	0	0	0	0	0	0	0	0
[truncated: 50 more rows]

## Sheet: LB Data
Photon energy (keV)	Number of counts	Number of counts	Number of counts	Number of counts	Number of counts	Number of counts	Number of counts	Number of counts	Number of counts	Number of counts	Number of counts	Number of counts	Number of counts
File name	Lamb_bone_50kV_1mA_10s_0.0mm_1	Lamb_bone_50kV_1mA_10s_0.5mm_1	Lamb_bone_50kV_1mA_10s_1.0mm_1	Lamb_bone_50kV_1mA_10s_1.5mm_1	Lamb_bone_50kV_1mA_10s_2.0mm_1	Lamb_bone_50kV_1mA_10s_2.5mm_1	Lamb_bone_50kV_1mA_10s_3.0mm_1	Lamb_bone_50kV_1mA_10s_3.5mm_1	Lamb_bone_50kV_1mA_10s_4.0mm_1	Lamb_bone_50kV_1mA_10s_4.5mm_1	Lamb_bone_50kV_1mA_300s_0.8mm_1	Lamb_bone_50kV_1mA_300s_0.8mm_2	Lamb_bone_50kV_1mA_300s_0.8mm_3
0	0	0	0	0	0	0	0	0	0	0	0	0	0
0.024591	0	0	0	0	0	0	0	0	0	0	0	0	0
0.049182	0	0	0	0	0	0	0	0	0	0	0	0	0
0.073773	0	0	0	0	0	0	0	0	0	0	0	0	0
0.098364	0	0	0	0	0	0	0	0	0	0	0	0	0
0.122955	0	0	0	0	0	0	0	0	0	0	0	0	0
0.147546	0	0	0	0	0	0	0	0	0	0	0	0	0
0.172137	0	0	0	0	0	0	0	0	0	0	0	0	0
0.196728	0	0	0	0	0	0	0	0	0	0	0	0	0
0.221319	0	0	0	0	0	0	0	0	0	0	0	0	0
0.24591	0	0	0	0	0	0	0	0	0	0	0	0	0
0.270501	0	0	0	0	0	0	0	0	0	0	0	0	0
0.295092	0	0	0	0	0	0	0	0	0	0	0	0	0
0.319683	0	0	0	0	0	0	0	0	0	0	0	0	0
0.344274	0	0	0	0	0	0	0	0	0	0	0	0	0
0.368865	0	0	0	0	0	0	0	0	0	0	0	0	0
0.393456	0	0	0	0	0	0	0	0	0	0	0	0	0
0.418047	0	0	0	0	0	0	0	0	0	0	0	0	0
0.442638	0	0	0	0	0	0	0	0	0	0	0	0	0
0.467229	0	0	0	0	0	0	0	0	0	0	0	0	0
0.49182	0	0	0	0	3	1	1	0	0	0	16	14	14
0.516411	0	1	0	0	0	0	0	1	3	0	27	21	27
0.541002	0	2	2	0	0	0	0	0	1	1	26	14	28
0.565593	2	0	0	0	3	0	1	1	0	1	27	19	17
0.590184	0	0	1	1	1	1	1	0	0	1	16	21	28
0.614775	0	2	5	1	0	0	1	0	0	2	29	19	19
0.639366	0	0	0	2	0	1	2	0	1	0	29	19	19
0.663957	0	1	2	1	0	0	0	1	1	0	19	28	22
0.688548	0	0	0	0	1	0	1	0	0	0	17	12	18
0.713139	0	0	0	1	1	2	2	0	0	0	13	19	22
0.73773	0	0	0	2	2	0	2	1	0	1	27	20	20
0.762321	0	0	1	2	0	0	0	0	0	0	19	21	21
0.786912	0	2	0	1	0	0	1	0	0	0	16	22	25
0.811503	0	0	1	0	0	1	0	0	1	0	28	19	27
0.836094	0	0	1	0	1	0	1	0	0	0	20	12	16
0.860685	0	0	1	0	0	0	0	2	0	0	20	24	28
0.885276	0	0	2	1	1	0	0	0	0	0	15	18	25
0.909867	0	0	1	1	0	1	1	0	1	0	17	22	18
0.934458	1	2	0	1	0	1	0	0	0	0	19	20	21
0.959049	1	1	2	1	2	0	1	0	0	0	22	19	23
0.98364	0	0	0	0	0	1	0	2	0	0	25	23	23
1.00823	1	1	2	0	1	1	0	0	1	0	19	21	18
1.03282	0	2	0	0	1	0	0	0	0	1	10	16	20
1.05741	1	1	0	0	1	0	0	0	0	0	14	17	17
1.082	0	1	1	0	0	0	0	0	1	1	25	16	17
1.10659	1	0	0	0	0	0	1	0	2	0	19	18	17
1.13119	1	0	0	1	0	0	0	0	0	0	18	13	19
1.15578	1	3	2	0	3	0	0	0	0	0	9	20	26
1.18037	0	1	0	1	1	1	1	0	0	0	12	19	15
1.20496	0	0	0	1	0	1	0	1	1	0	17	17	16
1.22955	0	1	0	0	1	1	1	0	0	0	18	12	19
1.25414	0	0	1	0	1	0	1	0	0	0	10	16	26
1.27873	0	0	2	0	1	2	1	2	0	0	18	18	16
1.30332	0	0	0	0	0	0	0	0	0	0	15	17	17
1.32791	0	0	0	0	0	1	0	1	0	0	11	13	19
1.35251	2	2	0	0	0	0	0	1	0	0	22	19	19
1.3771	0	0	0	0	0	2	1	0	1	0	14	20	9
1.40169	0	0	1	1	2	0	1	2	0	0	15	16	14
1.42628	0	0	2	3	1	2	0	0	0	0	24	17	15
1.45087	0	0	0	0	1	0	1	0	0	0	15	9	16
1.47546	0	1	3	1	1	0	1	0	1	2	13	27	23
1.50005	4	0	0	0	0	1	0	1	1	0	22	15	25
1.52464	0	0	0	1	0	1	0	0	0	0	21	23	17
1.54923	1	0	1	1	0	2	0	0	0	0	16	11	11
1.57382	0	1	0	0	0	0	1	0	0	0	13	17	16
1.59841	1	0	1	0	0	1	0	0	0	1	9	16	10
1.62301	0	0	0	0	0	1	1	0	0	0	20	22	19
1.6476	0	0	0	0	0	0	1	0	0	0	15	13	15
1.67219	0	0	0	0	1	0	0	0	0	0	9	17	13
1.69678	0	0	0	0	0	1	1	1	0	1	12	15	15
1.72137	0	0	1	0	0	1	1	0	0	0	9	23	22
1.74596	0	0	0	0	0	0	0	0	0	1	20	14	15
1.77055	1	0	0	1	1	0	0	1	0	1	25	23	17
1.79514	0	0	1	0	0	0	0	0	0	0	14	15	16
1.81973	0	0	2	1	2	1	1	0	0	0	23	21	18
1.84432	0	0	0	1	1	0	0	0	0	0	20	32	15
1.86892	0	1	1	4	1	0	0	1	0	0	23	17	21
1.89351	2	1	1	1	0	1	0	0	0	0	31	33	35
1.9181	0	3	0	2	0	4	0	0	1	0	58	61	50
1.94269	1	2	2	2	1	2	0	0	0	0	69	67	66
1.96728	2	3	6	2	2	0	0	0	0	0	96	88	95
1.99187	2	1	3	0	1	0	2	0	1	0	75	94	93
2.01646	1	5	3	3	1	2	1	0	0	1	80	71	104
2.04105	3	0	5	0	1	0	0	0	0	0	61	63	66
2.06564	0	1	2	1	0	0	0	0	0	0	32	31	46
2.09023	1	1	0	0	1	0	0	0	0	0	26	26	29
2.11483	1	0	1	0	0	2	0	0	1	0	16	16	13
2.13942	0	0	1	0	1	0	0	0	0	0	20	14	22
2.16401	0	0	0	0	0	0	1	0	0	0	16	21	21
2.1886	1	0	2	0	1	1	1	0	0	0	14	8	16
2.21319	0	1	0	2	0	0	1	0	0	0	19	20	13
2.23778	0	0	2	0	0	0	2	1	0	1	19	13	18
2.26237	0	1	1	0	2	1	0	0	0	0	21	11	20
2.28696	1	1	0	2	0	0	1	0	1	0	23	21	29
2.31155	0	1	0	0	0	0	0	1	1	0	19	23	15
2.33615	0	1	2	0	0	0	1	0	1	0	25	23	18
2.36074	0	0	0	0	0	0	0	0	0	1	8	21	14
2.38533	0	1	0	0	1	1	0	0	0	0	10	14	10
2.40992	1	0	0	0	0	0	0	0	0	3	16	13	12
2.43451	0	2	0	1	0	0	1	0	0	0	11	17	10
2.4591	0	0	0	0	0	0	1	0	0	0	10	9	10
2.48369	0	0	0	0	0	0	0	0	1	0	5	8	14
2.50828	0	0	0	1	1	0	1	0	1	0	10	4	8
2.53287	0	0	1	1	0	0	0	0	0	0	9	4	8
2.55746	0	0	0	0	0	0	1	0	1	0	7	14	11
2.58205	0	0	0	1	0	0	1	1	1	0	10	15	7
2.60665	0	0	0	0	0	1	0	0	1	0	10	4	10
2.63124	0	0	0	0	0	0	0	0	1	0	18	18	18
2.65583	0	0	1	1	0	0	1	0	0	0	15	13	15
2.68042	0	0	0	1	0	1	0	0	0	0	7	9	11
2.70501	0	0	1	0	1	0	0	0	0	0	9	11	6
2.7296	0	0	0	1	0	0	0	0	0	0	7	4	8
2.75419	0	1	1	0	0	1	1	0	0	0	10	9	9
2.77878	1	1	1	0	1	1	0	0	1	0	9	12	7
2.80337	2	0	1	0	0	0	0	0	0	0	8	3	9
2.82796	0	0	0	0	0	0	2	0	0	0	7	9	6
2.85256	1	0	0	1	0	0	1	0	0	0	10	4	7
2.87715	0	2	0	0	0	0	0	0	0	1	8	11	9
2.90174	3	1	0	0	0	0	1	0	0	0	7	11	15
2.92633	0	0	1	0	1	0	0	0	1	0	18	13	13
2.95092	0	0	0	1	0	0	0	0	1	0	24	25	14
2.97551	0	1	0	0	1	1	1	2	0	1	18	27	22
3.0001	1	1	1	1	1	0	0	0	1	0	11	22	11
3.02469	0	0	1	0	0	0	0	0	0	0	10	7	18
3.04928	0	0	1	0	0	0	1	1	0	1	9	12	11
3.07388	0	0	0	0	1	0	0	0	0	0	18	11	8
3.09847	0	0	0	0	0	0	0	0	0	0	9	7	12
3.12306	1	0	1	0	0	0	0	0	1	0	11	18	16
3.14765	0	1	0	0	1	0	0	0	0	0	16	18	20
3.17224	1	1	0	0	1	0	1	0	0	1	13	18	18
3.19683	0	0	3	0	1	0	0	0	0	1	23	13	11
3.22142	0	1	0	1	0	0	0	0	1	0	18	28	31
3.24601	1	0	1	1	1	0	0	0	0	0	29	16	27
3.2706	0	1	1	1	1	0	0	0	0	0	37	31	22
3.29519	1	0	0	1	0	1	0	0	0	0	20	34	33
3.31978	1	0	0	0	0	0	1	0	1	0	34	28	24
3.34438	0	2	0	0	1	2	0	1	0	0	31	31	26
3.36897	1	1	2	0	0	1	0	0	0	0	32	24	34
3.39356	0	0	0	1	0	0	0	0	0	0	23	29	23
3.41815	0	1	1	0	1	1	0	0	0	0	21	25	37
3.44274	0	0	0	0	0	0	0	0	0	0	26	33	21
3.46733	1	0	1	0	1	0	0	0	0	0	22	31	23
3.49192	1	2	0	0	0	0	0	0	0	0	36	40	28
3.51651	0	1	2	1	0	1	1	0	0	0	40	45	39
3.5411	0	2	4	0	2	1	1	1	2	0	69	68	81
3.56569	1	8	2	3	3	2	2	1	0	1	172	160	169
3.59029	10	20	12	15	7	3	1	1	2	0	479	490	514
3.61488	17	49	39	24	11	3	5	2	5	2	1173	1223	1234
3.63947	50	85	82	48	30	23	12	8	8	6	2406	2328	2362
3.66406	81	110	88	70	48	21	18	16	9	16	3688	3643	3605
3.68865	88	129	123	77	42	31	27	19	10	17	4172	4137	4172
3.71324	70	127	107	68	49	22	18	7	9	14	3429	3586	3624
3.73783	46	72	65	44	28	19	15	6	5	12	2324	2345	2344
3.76242	19	33	24	26	13	6	6	1	6	3	1072	1135	1203
3.78701	6	13	15	9	2	4	3	0	0	0	414	426	453
3.81161	2	4	4	2	2	1	0	0	0	0	145	145	158
3.8362	1	3	4	0	0	1	0	1	0	0	56	44	54
3.86079	1	0	3	0	1	0	0	0	0	1	49	45	44
3.88538	1	1	1	3	1	0	1	0	0	0	43	52	54
3.90997	3	3	2	7	0	1	1	0	1	1	116	109	117
3.93456	4	7	8	2	6	1	3	1	1	0	211	199	217
3.95915	7	12	8	5	4	2	4	0	0	0	393	389	364
3.98374	12	19	17	10	6	4	4	2	0	3	589	574	511
4.00833	12	25	19	13	14	3	6	4	3	2	646	680	652
4.03292	17	15	17	10	9	4	7	4	0	2	592	609	590
4.05752	15	8	14	8	5	0	4	1	0	1	372	397	425
4.08211	0	9	7	3	1	0	3	0	4	0	198	232	209
4.1067	2	2	1	2	2	0	0	1	0	0	113	87	88
4.13129	2	2	3	1	1	0	0	0	0	0	30	34	30
4.15588	0	0	1	0	1	0	0	0	0	0	14	10	7
4.18047	0	0	0	0	1	0	0	0	0	0	4	5	9
4.20506	0	0	0	0	0	0	0	0	0	0	4	3	5
4.22965	0	0	0	0	0	0	0	0	0	0	4	2	4
4.25424	0	0	0	0	0	0	0	0	0	1	1	1	1
4.27883	0	0	2	0	1	0	0	0	0	0	4	3	3
4.30342	0	0	0	0	2	0	0	0	0	0	3	3	5
4.32802	0	0	0	0	0	0	0	0	0	0	3	1	6
4.35261	0	0	0	0	0	1	0	0	0	0	1	3	3
4.3772	0	0	0	0	0	0	0	0	0	0	5	1	1
4.40179	0	0	0	0	0	0	0	0	0	0	0	3	4
4.42638	0	0	0	0	0	0	0	1	0	0	2	3	5
4.45097	0	0	0	0	0	0	1	0	0	0	4	5	1
4.47556	0	0	0	0	0	0	0	1	0	0	4	2	4
4.50015	0	0	0	0	0	0	0	0	0	0	4	6	7
4.52474	0	0	1	0	0	0	0	0	0	0	3	3	7
4.54934	0	0	0	0	0	0	0	0	0	0	2	3	2
4.57393	0	0	0	0	0	0	0	0	0	0	3	1	2
4.59852	0	0	0	0	0	0	0	0	0	0	1	5	4
4.62311	0	0	0	0	0	0	0	0	0	0	2	4	4
4.6477	0	0	0	0	0	0	0	0	0	0	5	0	3
4.67229	0	1	0	0	0	0	0	0	0	0	2	2	2
4.69688	0	0	0	0	0	0	0	0	0	0	7	2	1
4.72147	0	0	0	0	0	0	0	0	0	0	3	0	3
4.74606	0	0	0	0	0	0	0	0	0	0	0	12	2
4.77065	0	0	0	0	0	0	0	0	1	0	4	3	4
4.79525	0	0	1	0	0	0	0	0	0	0	3	2	2
4.81984	0	0	0	0	0	0	0	0	0	0	5	4	3
4.84443	0	0	0	0	0	0	0	0	0	0	4	8	2
4.86902	0	0	0	0	0	0	0	0	0	0	5	5	8
4.89361	0	0	0	0	0	0	0	0	0	0	2	1	2
4.9182	0	0	0	0	0	0	1	0	0	0	2	3	7
4.94279	0	0	0	0	0	0	0	0	0	0	2	3	2
4.96738	0	0	0	0	0	0	0	0	0	0	2	3	5
4.99197	0	1	0	0	0	0	0	0	0	0	0	1	1
5.01656	0	0	0	0	0	0	0	0	0	0	0	3	4
5.04115	0	0	0	0	0	0	0	0	0	0	2	2	0
5.06575	0	0	1	0	0	0	0	0	0	1	4	0	3
5.09034	0	0	0	0	0	0	0	0	0	0	3	2	7
5.11493	0	0	0	0	0	0	0	0	0	0	0	2	2
5.13952	0	0	0	0	0	0	0	0	0	0	1	1	4
5.16411	0	0	1	0	0	0	0	0	0	0	6	2	2
5.1887	0	0	0	0	0	0	0	0	0	0	1	1	1
5.21329	0	0	0	0	0	0	0	0	0	0	3	2	1
5.23788	0	0	0	0	0	0	0	0	0	0	1	2	1
5.26247	0	0	0	0	0	0	0	0	0	0	1	2	1
5.28707	0	1	0	0	0	0	0	0	0	0	1	0	0
5.31166	0	0	0	0	0	0	0	0	0	0	1	1	3
5.33625	0	0	0	0	0	0	0	0	0	0	3	1	4
5.36084	0	0	0	0	0	0	0	0	0	0	3	3	1
5.38543	0	0	0	0	0	0	0	0	0	0	0	3	3
5.41002	0	0	0	0	0	0	0	0	0	0	3	4	3
5.43461	0	0	0	0	0	0	0	0	0	0	2	0	2
5.4592	0	0	0	0	0	0	0	0	0	0	0	6	0
5.48379	1	0	0	0	0	0	0	0	0	0	1	1	1
5.50838	0	0	0	0	0	0	0	0	0	0	2	0	2
5.53298	0	1	0	0	0	0	0	0	1	0	3	2	3
5.55757	1	0	0	0	0	0	0	0	0	0	1	0	2
5.58216	0	0	0	0	0	0	0	0	0	0	3	1	1
5.60675	0	0	0	0	0	0	0	0	0	0	2	0	2
5.63134	0	0	0	0	0	0	0	0	0	0	1	2	1
5.65593	0	0	0	0	0	0	0	0	0	0	0	1	2
5.68052	0	0	0	0	0	0	0	0	0	0	3	1	0
5.70511	0	0	0	0	0	0	0	0	0	0	3	0	2
5.7297	0	0	0	0	0	0	0	0	0	0	1	2	3
5.75429	0	0	0	0	0	0	0	0	0	0	5	1	7
5.77888	0	0	0	0	0	0	0	0	0	1	3	1	4
5.80348	0	0	0	0	0	0	0	0	0	1	4	2	11
5.82807	0	0	2	0	0	0	0	0	0	0	2	6	4
5.85266	0	0	0	0	0	0	0	0	0	0	5	5	4
5.87725	1	0	0	0	0	0	0	0	1	0	4	3	4
5.90184	0	0	0	0	1	0	0	0	1	0	9	3	6
5.92643	1	0	0	0	0	0	0	1	0	0	9	3	5
5.95102	1	0	0	0	0	0	0	0	0	0	4	6	3
5.97561	0	0	0	0	0	0	0	0	0	0	2	2	4
6.0002	0	0	0	0	0	0	0	0	0	0	2	2	4
6.0248	0	0	1	0	0	0	0	0	0	0	2	1	1
6.04939	0	0	0	0	0	0	0	0	0	0	3	1	2
6.07398	0	0	0	0	0	0	0	0	0	0	5	2	5
6.09857	0	0	1	0	0	0	0	0	0	0	1	2	1
6.12316	0	0	0	0	0	0	0	0	0	0	0	1	2
6.14775	0	0	0	0	0	0	0	0	0	0	1	0	2
6.17234	0	1	0	0	0	1	0	0	0	0	1	2	1
6.19693	0	0	0	0	0	0	0	0	0	0	2	0	1
6.22152	0	0	0	0	0	0	0	0	0	0	1	4	1
6.24611	0	0	0	0	0	0	0	0	0	0	2	0	0
6.27071	0	0	0	0	0	0	0	0	0	0	3	7	3
6.2953	0	0	0	0	0	0	1	0	0	0	4	4	3
6.31989	0	1	0	0	0	0	0	0	1	0	5	8	5
6.34448	0	0	0	0	1	1	0	0	0	0	3	10	5
6.36907	0	0	0	1	0	0	0	1	1	0	9	10	14
6.39366	0	1	0	1	0	1	0	1	0	0	13	14	17
6.41825	0	1	0	1	0	0	0	0	0	0	10	14	13
6.44284	0	0	0	0	0	0	0	0	0	0	7	7	7
6.46743	1	0	1	0	0	0	0	0	0	0	5	6	6
6.49202	0	0	0	0	0	0	0	0	0	0	5	9	5
6.51661	0	0	0	1	0	0	0	0	0	0	3	5	5
6.54121	1	0	0	0	0	0	0	0	0	0	3	3	1
6.5658	0	0	0	0	0	0	0	0	0	0	0	1	1
6.59039	0	0	0	0	0	0	0	0	0	0	2	2	2
6.61498	0	0	0	0	0	0	0	0	0	0	0	3	2
6.63957	0	0	0	0	0	0	0	0	0	0	2	3	2
6.66416	0	0	0	0	0	0	0	0	0	0	2	4	1
6.68875	0	0	0	0	0	0	0	0	0	0	1	0	2
6.71334	0	0	0	0	0	0	0	0	0	0	2	4	1
6.73793	0	0	0	0	0	0	0	0	0	0	1	1	0
6.76253	0	0	0	0	0	0	0	0	0	0	3	0	1
6.78712	0	0	0	0	0	0	0	0	0	0	2	2	1
6.81171	0	0	0	0	0	0	0	0	0	1	2	3	5
6.8363	0	0	0	0	1	0	0	0	0	0	3	2	1
6.86089	0	0	0	0	0	0	0	0	0	0	2	2	2
6.88548	0	1	0	0	0	0	0	0	0	0	1	2	2
6.91007	0	0	0	0	0	1	0	0	0	0	2	0	2
6.93466	0	0	0	0	0	0	0	0	0	0	1	3	2
6.95925	0	0	0	0	0	0	0	0	0	1	4	2	0
6.98384	1	0	0	0	0	0	0	0	0	0	0	0	1
7.00844	0	0	0	0	0	0	0	0	0	0	1	3	5
7.03303	0	0	0	0	0	0	0	0	0	0	1	0	4
7.05762	0	0	0	0	0	0	0	0	0	0	4	2	2
7.08221	0	0	0	1	0	0	0	0	0	0	1	2	1
7.1068	0	0	0	0	0	0	0	0	1	0	3	7	3
7.13139	0	0	0	0	0	0	0	0	0	0	1	4	1
7.15598	0	0	0	0	0	0	1	0	0	0	0	0	2
7.18057	0	0	0	0	0	0	0	0	0	0	1	3	2
7.20516	0	0	0	0	0	0	0	0	1	0	1	4	2
7.22975	0	0	0	0	0	0	0	0	0	0	2	3	0
7.25434	0	0	0	0	0	0	0	0	0	0	3	1	3
7.27894	0	0	0	0	0	0	0	0	0	0	2	3	1
7.30353	0	0	0	0	0	0	0	0	0	0	2	4	6
7.32812	0	0	0	0	0	0	0	0	0	0	4	3	3
7.35271	0	0	0	0	1	1	0	0	0	0	0	3	5
7.3773	0	0	0	0	0	1	0	0	0	1	6	9	9
7.40189	0	0	0	0	0	1	0	0	0	0	10	6	11
7.42648	0	0	0	0	1	0	0	0	0	0	9	7	12
7.45107	1	0	2	0	0	0	1	0	0	1	12	13	7
7.47566	0	0	0	1	0	0	1	1	0	0	7	14	20
7.50026	0	0	0	0	0	0	0	0	0	0	10	11	9
7.52485	0	0	0	0	0	0	0	0	0	0	8	8	10
7.54944	0	0	0	0	0	0	0	0	0	0	10	4	7
7.57403	0	0	0	0	0	0	0	0	0	0	3	2	3
7.59862	0	0	0	0	0	0	0	0	0	0	2	2	4
7.62321	0	0	0	1	0	0	0	0	0	0	0	3	3
7.6478	0	0	0	0	0	0	0	0	0	0	1	1	4
7.67239	0	0	0	0	0	0	0	0	0	0	0	3	5
7.69698	0	0	0	0	0	0	0	0	0	0	0	1	3
7.72157	0	0	0	0	1	0	0	0	0	0	2	2	3
7.74617	0	0	0	0	0	0	0	0	0	0	5	1	0
7.77076	0	0	0	0	0	0	0	0	0	0	0	2	3
7.79535	0	0	0	1	0	0	0	0	0	0	3	5	1
7.81994	0	0	0	0	0	0	0	1	0	0	2	3	3
7.84453	0	0	0	0	0	0	0	0	0	1	3	4	2
7.86912	0	0	0	0	0	0	0	0	1	0	4	10	9
7.89371	0	0	0	0	0	0	1	1	0	0	11	20	9
7.9183	0	2	0	0	0	2	0	0	0	1	31	27	31
7.94289	1	3	2	1	1	1	2	0	2	2	31	57	49
7.96748	0	2	0	4	0	2	1	1	1	1	69	62	55
7.99207	2	3	5	4	4	3	0	0	0	2	91	86	70
8.01667	1	0	7	4	1	3	2	0	4	2	93	75	77
8.04126	0	3	2	2	0	2	0	1	0	0	84	84	84
8.06585	1	2	1	2	0	0	0	2	0	1	71	84	67
8.09044	0	0	1	2	3	4	1	0	1	2	53	47	38
8.11503	1	2	2	1	1	1	0	0	0	1	30	29	37
8.13962	0	0	0	2	0	0	0	0	0	0	13	13	11
8.16421	0	0	0	1	0	0	1	0	0	0	10	10	13
8.1888	1	0	0	0	0	0	0	0	0	0	5	5	5
8.21339	0	0	0	1	1	0	0	0	0	0	5	7	3
8.23799	0	0	0	0	0	0	0	0	0	0	3	0	3
8.26258	0	1	0	0	0	0	0	0	0	0	1	5	5
8.28717	0	0	1	0	0	1	0	1	0	0	5	2	2
8.31176	0	0	0	0	0	0	0	0	0	0	4	4	2
8.33635	0	0	0	1	0	0	0	0	0	0	4	2	7
8.36094	0	0	0	0	0	0	0	0	0	0	1	4	4
8.38553	0	0	0	0	0	0	0	0	0	0	5	3	4
8.41012	0	0	0	0	0	0	0	0	0	0	1	6	0
8.43471	0	0	0	0	0	0	0	0	0	0	3	6	1
8.4593	0	0	1	0	0	0	0	0	0	0	13	4	3
8.4839	0	1	0	1	0	1	0	0	0	0	17	17	14
8.50849	1	0	1	0	0	0	2	0	0	0	20	18	17
8.53308	2	1	0	1	0	0	0	0	1	0	40	30	43
8.55767	1	2	2	2	0	1	1	0	1	0	40	54	51
8.58226	3	2	1	0	1	0	2	0	0	0	67	45	72
8.60685	5	3	3	1	1	1	0	0	0	0	61	73	72
8.63144	1	2	5	0	1	0	1	0	1	0	53	69	56
8.65603	1	1	2	0	1	0	0	0	0	0	57	63	53
8.68062	2	1	0	1	1	0	0	1	0	0	38	44	34
8.70521	0	0	0	1	0	0	0	0	0	0	39	30	27
8.72981	0	0	0	0	0	0	1	1	0	0	11	16	11
8.7544	0	0	1	0	0	0	0	0	0	0	11	11	9
8.77899	0	1	1	0	1	0	1	0	0	0	8	9	6
8.80358	1	0	0	0	0	0	0	0	0	0	11	7	17
8.82817	1	0	0	1	1	0	0	0	0	1	11	12	14
8.85276	0	0	0	1	0	0	0	0	0	0	21	21	8
8.87735	0	0	0	0	0	1	0	1	0	0	16	16	20
8.90194	0	0	0	1	1	0	1	0	1	0	21	9	11
8.92653	0	0	0	0	0	0	0	0	0	0	14	17	14
8.95112	0	0	0	1	0	1	1	0	0	1	7	7	12
8.97571	1	1	0	1	0	0	0	0	1	0	9	5	6
9.00031	0	0	0	0	0	0	0	0	0	0	2	3	5
9.0249	0	0	0	0	0	0	0	0	0	1	1	2	2
9.04949	0	0	0	0	1	0	0	0	0	0	3	4	2
9.07408	0	0	0	0	0	0	0	0	0	0	0	3	2
9.09867	0	0	0	0	0	0	0	0	0	0	0	2	3
9.12326	0	0	0	0	0	0	0	0	0	0	7	3	5
9.14785	0	0	0	0	0	0	0	0	0	0	2	0	4
9.17244	0	0	0	0	1	0	0	0	0	0	2	2	2
9.19703	0	0	0	0	0	0	0	0	0	0	3	2	3
9.22162	0	0	0	0	0	0	0	0	1	0	0	3	3
9.24622	1	0	0	0	0	0	0	0	0	0	4	1	3
9.27081	0	0	0	0	0	0	0	0	0	0	1	1	1
9.2954	0	0	0	0	0	0	0	0	0	0	1	1	4
9.31999	0	0	0	0	0	0	0	0	0	0	1	0	6
9.34458	0	0	0	0	0	0	0	0	0	0	1	1	2
9.36917	0	0	0	0	0	0	0	0	0	0	3	1	2
9.39376	0	0	1	0	0	0	0	0	0	0	5	6	7
9.41835	0	0	0	0	0	0	0	0	0	0	3	5	3
9.44294	0	1	1	0	0	0	0	0	0	0	5	6	6
9.46753	0	0	0	0	0	0	0	0	0	0	7	5	5
9.49213	0	1	1	1	0	0	0	0	0	0	7	9	8
9.51672	0	2	0	1	2	0	0	0	0	0	9	14	11
9.54131	0	0	0	1	1	0	0	0	0	0	6	9	14
9.5659	1	1	2	1	0	0	0	0	0	0	16	12	10
9.59049	0	0	0	0	0	0	0	0	0	1	13	9	7
9.61508	0	0	0	0	0	0	0	0	0	0	3	11	13
9.63967	0	2	0	0	1	0	0	0	0	0	4	9	6
9.66426	0	1	0	0	0	0	0	0	0	0	4	5	6
9.68885	0	0	0	0	0	0	0	0	0	0	5	5	4
9.71345	0	0	0	0	0	0	0	0	0	0	2	3	3
9.73804	0	0	0	0	0	0	0	0	0	1	3	1	5
9.76263	0	0	0	0	0	0	0	0	0	0	1	4	2
9.78722	0	0	0	0	0	0	0	0	0	0	1	4	3
9.81181	0	0	0	0	0	0	0	0	0	0	1	5	2
9.8364	0	0	0	0	0	0	0	0	0	0	2	1	0
9.86099	0	0	0	0	0	0	0	0	0	0	0	2	3
9.88558	0	0	0	0	0	0	0	0	0	0	1	1	3
9.91017	0	0	0	0	0	1	0	0	0	0	2	2	1
9.93476	0	0	0	0	0	2	0	0	0	0	1	2	1
9.95936	0	0	0	0	0	0	0	0	0	0	2	3	1
9.98395	0	0	0	0	0	0	0	0	0	0	3	0	1
10.0085	1	0	0	0	0	0	0	0	0	0	1	1	0
10.0331	0	0	0	0	0	0	0	0	0	0	1	2	1
10.0577	0	0	0	0	0	0	0	0	0	0	2	3	1
10.0823	0	0	0	0	0	0	0	0	0	0	1	4	3
10.1069	0	0	0	0	0	0	0	0	0	0	3	0	0
10.1315	0	0	0	0	0	0	0	0	0	0	1	4	1
10.1561	0	0	0	0	0	0	0	0	0	0	2	4	2
10.1807	0	0	0	0	0	0	0	0	0	0	1	5	3
10.2053	0	0	0	0	0	0	0	0	0	0	1	0	1
10.2299	0	0	0	0	0	0	0	0	0	0	3	3	6
10.2544	0	0	0	0	0	0	0	0	0	0	5	3	4
10.279	0	0	0	0	0	0	0	0	0	0	1	4	1
10.3036	0	0	0	0	0	0	0	0	0	0	2	2	0
10.3282	0	0	0	0	0	0	0	0	0	0	4	0	1
10.3528	0	0	0	0	0	0	0	0	0	0	6	1	1
10.3774	0	0	0	0	0	0	0	0	0	0	2	0	4
10.402	0	0	0	0	0	0	0	0	0	0	3	1	3
10.4266	0	0	0	0	0	0	0	0	0	0	0	3	4
10.4512	0	0	0	0	0	0	0	0	0	0	3	1	0
10.4758	0	0	1	0	1	0	0	0	1	0	4	6	2
10.5004	0	0	0	0	0	0	1	0	0	0	2	4	1
10.5249	0	0	0	0	0	0	0	0	0	0	1	0	6
10.5495	0	0	0	0	0	0	0	0	0	0	7	0	5
10.5741	0	0	0	1	0	0	0	0	0	0	4	3	3
10.5987	0	0	0	0	0	0	0	0	0	0	5	1	1
10.6233	1	0	0	0	0	0	0	0	0	0	1	5	6
10.6479	0	0	0	0	0	0	0	0	0	1	2	1	1
10.6725	0	0	0	0	0	1	0	0	0	0	0	1	1
10.6971	0	0	0	0	0	0	0	0	0	0	1	1	2
10.7217	0	0	1	0	0	0	0	0	0	0	3	0	6
10.7463	0	0	0	0	0	0	0	0	0	0	5	1	8
10.7709	0	0	0	0	0	0	0	0	0	0	3	2	1
10.7954	1	0	0	0	0	0	0	0	0	0	2	2	2
10.82	0	0	0	0	0	0	1	0	0	0	1	1	0
10.8446	0	0	0	0	0	0	0	0	0	0	3	2	4
10.8692	0	0	1	0	0	1	0	0	0	0	4	0	5
10.8938	0	0	0	0	0	1	0	0	0	0	3	2	3
10.9184	0	0	0	0	0	0	0	0	0	0	3	1	4
10.943	0	0	0	0	0	0	0	0	0	0	1	1	2
10.9676	0	0	0	1	0	0	0	1	0	0	3	3	2
10.9922	0	0	0	0	0	0	0	0	0	0	1	3	1
11.0168	0	0	0	0	0	0	0	0	0	0	0	0	3
11.0414	0	0	0	0	0	0	0	0	0	0	4	4	0
11.066	0	0	0	0	0	0	0	0	0	0	1	4	4
11.0905	0	0	0	0	0	0	0	0	0	0	1	2	4
11.1151	0	0	0	0	0	0	0	0	0	1	0	2	4
11.1397	0	0	0	0	0	0	0	0	0	0	6	3	4
11.1643	0	0	0	0	0	0	0	0	0	0	3	3	2
11.1889	0	0	1	0	1	0	0	0	0	0	3	6	3
11.2135	0	0	0	0	0	0	0	0	0	0	3	1	2
11.2381	0	0	0	0	0	0	0	0	0	0	5	2	9
11.2627	0	0	0	0	0	0	0	0	0	0	6	5	3
11.2873	0	0	0	1	0	0	0	0	0	0	3	3	7
11.3119	0	1	1	0	0	0	0	0	0	0	2	5	6
11.3365	0	0	1	0	0	0	0	0	0	0	2	1	5
11.361	0	0	0	1	1	1	1	0	0	0	3	4	0
11.3856	0	0	0	0	0	0	0	0	0	0	3	9	4
11.4102	0	0	0	0	1	0	0	0	0	0	7	3	3
11.4348	0	0	0	0	0	0	0	0	0	0	2	1	3
11.4594	0	0	1	0	0	0	1	0	1	0	0	1	3
11.484	0	0	0	1	2	0	0	0	0	0	4	3	4
11.5086	0	0	0	0	0	0	0	0	0	0	1	7	4
11.5332	0	0	0	0	0	1	0	0	0	0	3	3	1
11.5578	0	0	0	0	0	0	0	0	0	0	4	3	8
11.5824	0	0	0	0	0	0	0	0	0	0	3	2	2
11.607	1	0	0	0	0	1	0	0	0	0	3	2	3
11.6315	0	0	0	0	0	1	1	0	0	0	5	5	5
11.6561	0	0	0	0	0	0	0	0	0	0	3	6	5
11.6807	0	0	0	0	0	0	0	1	0	0	6	7	8
11.7053	0	0	0	0	0	0	1	0	0	0	0	3	5
11.7299	0	0	0	0	0	0	0	0	0	0	6	6	3
11.7545	0	0	0	0	1	0	0	0	0	0	7	4	7
11.7791	0	0	0	0	0	0	1	0	0	0	2	2	8
11.8037	0	1	0	0	0	0	0	0	1	0	6	6	10
11.8283	0	0	1	0	0	0	0	0	0	0	4	2	6
11.8529	1	0	0	0	0	1	0	0	1	0	10	8	4
11.8775	1	0	1	0	0	0	0	0	0	0	12	6	4
11.902	0	0	1	0	0	1	0	0	0	0	6	10	6
11.9266	1	0	1	0	0	0	0	0	0	0	9	7	6
11.9512	0	1	0	0	0	0	1	0	0	0	2	5	4
11.9758	0	0	0	1	0	0	0	0	0	0	5	9	9
12.0004	1	0	0	1	0	0	0	1	0	0	8	6	2
12.025	0	0	0	0	0	0	1	0	0	0	8	11	2
12.0496	0	0	0	0	0	0	0	0	0	0	4	5	5
12.0742	0	0	0	0	1	0	0	0	0	0	3	3	0
12.0988	0	0	1	0	0	0	0	0	0	0	6	5	3
12.1234	0	0	0	0	0	0	0	0	0	0	7	10	7
12.148	0	0	0	0	0	0	0	1	0	0	5	5	3
12.1725	0	0	1	0	0	0	0	0	0	0	5	3	3
12.1971	0	1	0	0	0	0	0	0	0	0	9	7	5
12.2217	0	0	1	0	1	0	0	0	0	0	9	9	9
12.2463	1	0	0	0	1	1	0	0	0	0	11	8	9
12.2709	0	0	0	0	0	1	0	1	0	0	5	5	7
12.2955	0	1	1	0	0	0	0	0	0	0	11	13	3
12.3201	0	0	1	0	0	1	0	0	0	0	3	6	3
12.3447	0	0	0	0	0	1	0	0	0	0	11	9	8
12.3693	0	0	0	0	0	0	0	1	0	0	11	5	10
12.3939	1	0	0	0	1	0	0	0	0	0	5	2	8
12.4185	1	1	1	0	1	0	0	0	0	0	2	7	7
12.443	0	0	0	0	0	0	0	0	1	0	9	4	5
12.4676	2	1	1	0	0	0	0	0	1	0	7	5	9
12.4922	0	0	0	0	0	1	0	0	0	1	8	15	19
12.5168	0	0	1	0	0	0	0	0	0	0	8	7	8
12.5414	0	0	0	0	0	0	0	0	0	0	8	10	8
12.566	0	1	0	0	0	0	1	0	0	0	4	10	13
12.5906	0	0	0	1	0	0	0	0	0	0	8	13	11
12.6152	0	0	0	0	1	0	0	0	0	0	9	17	9
12.6398	0	0	2	0	0	1	0	0	0	2	11	8	15
12.6644	0	0	0	0	0	0	0	1	0	1	6	8	10
12.689	1	0	0	0	0	0	0	0	0	0	9	5	6
12.7135	0	0	1	0	0	0	0	0	1	0	12	7	13
12.7381	0	0	1	2	0	0	1	0	0	0	9	9	9
12.7627	0	1	0	0	1	3	1	0	0	0	8	11	7
12.7873	0	0	0	0	0	0	1	0	0	0	11	6	9
12.8119	0	1	0	0	0	1	0	0	0	0	8	11	4
12.8365	0	1	2	0	0	1	0	1	0	0	12	11	14
12.8611	0	0	0	1	1	0	0	0	0	0	17	7	10
12.8857	0	0	0	0	0	0	0	0	1	0	13	9	13
12.9103	0	0	1	0	0	1	0	0	0	0	16	13	24
12.9349	1	0	1	0	0	1	1	0	0	1	14	11	15
12.9595	0	0	1	0	1	0	1	0	1	1	16	13	9
12.984	0	0	0	0	0	0	0	0	0	0	12	18	11
13.0086	0	1	1	0	0	2	0	1	0	0	11	10	12
13.0332	1	0	0	0	0	0	0	0	0	0	12	10	10
13.0578	0	0	0	0	0	0	2	0	1	0	22	14	18
13.0824	0	1	1	0	1	0	0	0	0	0	20	15	15
13.107	0	0	1	0	1	1	0	0	0	0	16	11	18
13.1316	0	0	3	1	0	0	0	0	0	2	17	16	9
13.1562	0	0	2	1	1	0	1	1	0	0	19	7	19
13.1808	0	0	0	0	0	0	0	0	0	0	15	15	16
13.2054	1	0	2	2	0	0	0	0	0	0	20	20	13
13.23	0	0	0	0	1	0	0	0	0	0	10	17	16
13.2545	0	1	1	1	2	1	0	0	0	1	16	30	13
13.2791	0	0	1	0	0	0	0	1	0	1	16	17	17
13.3037	0	0	0	0	0	0	0	0	0	0	20	19	15
13.3283	3	0	0	1	0	0	0	0	0	0	23	13	14
13.3529	1	0	2	0	1	0	0	0	1	0	26	15	27
13.3775	0	0	1	1	0	0	0	0	0	1	22	15	18
13.4021	2	1	1	0	0	1	0	1	0	0	25	18	19
13.4267	0	1	0	0	0	0	0	0	1	3	25	15	30
13.4513	1	1	0	0	0	0	0	0	0	0	15	18	27
13.4759	0	0	1	2	1	0	0	0	0	0	18	26	14
13.5005	1	1	0	0	0	0	1	0	0	0	28	30	21
13.5251	1	0	0	1	0	1	0	0	0	0	31	28	23
13.5496	0	2	0	1	0	0	2	1	0	0	27	24	25
13.5742	1	1	2	4	0	1	1	0	0	0	23	22	29
13.5988	0	0	1	0	1	0	0	0	0	0	17	24	31
13.6234	0	0	0	1	0	1	0	0	0	0	29	37	26
13.648	2	0	1	2	2	0	0	1	0	0	20	21	23
13.6726	1	0	1	2	1	1	0	1	0	0	25	24	26
13.6972	1	1	1	0	0	0	0	0	0	0	28	20	17
13.7218	0	0	1	2	0	0	0	0	1	0	22	36	23
13.7464	2	2	0	0	1	0	1	0	0	0	24	32	29
13.771	0	1	0	1	3	2	1	2	0	1	35	26	26
13.7956	0	1	2	1	1	0	2	0	0	1	27	28	30
13.8201	1	1	1	2	2	0	1	0	0	0	35	32	39
13.8447	0	0	1	2	1	0	0	0	0	1	42	36	43
13.8693	3	2	2	1	2	1	0	0	1	1	42	51	56
13.8939	1	1	4	1	2	0	0	0	0	0	57	61	66
13.9185	1	1	1	4	1	0	1	0	0	0	93	70	72
13.9431	2	3	3	3	0	4	2	1	1	1	131	120	112
13.9677	6	8	9	5	5	2	6	5	3	2	158	163	178
13.9923	3	5	10	3	0	5	2	2	0	1	240	249	242
14.0169	5	11	14	11	5	9	3	3	3	1	286	315	323
14.0415	7	14	9	7	8	7	4	5	1	5	393	370	369
14.0661	7	12	14	14	14	7	7	4	3	3	447	395	401
14.0906	5	14	13	11	5	6	5	5	3	3	434	413	435
14.1152	9	17	17	14	12	6	7	6	1	1	377	445	432
14.1398	5	7	17	10	6	9	8	2	3	0	399	401	393
14.1644	4	8	9	7	9	2	4	3	0	3	294	322	342
14.189	5	7	7	9	5	2	4	5	1	4	257	287	263
14.2136	2	7	4	4	3	2	3	1	0	1	193	222	202
14.2382	2	6	3	4	4	4	1	2	1	1	123	165	158
14.2628	0	5	1	2	3	0	3	0	0	0	91	111	118
14.2874	4	3	3	3	2	0	1	0	1	0	83	77	76
14.312	0	3	4	3	2	2	1	0	1	0	64	53	59
14.3366	1	1	1	1	0	0	0	0	1	3	46	57	48
14.3611	0	2	2	3	1	0	1	0	0	0	52	43	39
14.3857	1	0	0	1	0	1	0	2	1	0	39	31	45
14.4103	0	1	0	2	2	0	1	0	0	0	39	42	53
14.4349	1	3	0	1	1	1	0	0	0	0	50	41	44
14.4595	0	2	1	2	5	0	0	1	0	0	49	41	51
14.4841	0	0	1	1	1	4	0	0	0	1	44	43	35
14.5087	1	0	2	0	3	0	1	1	0	2	47	40	40
14.5333	3	0	2	0	1	1	0	2	0	0	57	42	44
14.5579	0	0	0	1	3	2	2	1	0	2	49	45	47
14.5825	1	1	0	2	1	1	2	1	1	1	41	40	48
14.6071	1	0	0	0	4	1	1	1	0	2	52	47	50
14.6316	0	1	2	2	0	0	0	0	0	1	52	46	58
14.6562	1	2	3	0	1	2	1	0	1	0	41	49	53
14.6808	0	0	2	1	1	0	1	0	0	0	41	46	40
14.7054	2	1	2	1	1	1	3	2	1	2	42	64	63
14.73	0	3	0	0	3	3	0	0	1	0	52	54	45
14.7546	0	0	1	1	1	0	0	0	1	0	59	45	49
14.7792	0	3	3	1	2	1	0	1	2	0	58	27	49
14.8038	1	5	0	1	2	1	1	1	0	1	52	53	51
14.8284	0	1	3	3	1	3	0	1	0	2	47	51	46
14.853	0	3	4	1	0	0	0	1	0	1	49	54	49
14.8776	2	1	1	1	2	2	0	2	1	2	59	53	68
14.9021	0	1	1	0	2	2	1	0	0	1	44	51	63
14.9267	3	4	3	1	1	3	3	0	1	1	72	58	44
14.9513	0	2	1	0	1	2	0	2	0	3	50	43	59
14.9759	1	3	2	0	1	3	0	0	3	0	54	50	48
15.0005	1	4	1	1	0	0	2	1	0	0	60	52	49
15.0251	2	3	1	0	2	1	1	0	2	0	65	61	53
15.0497	0	2	2	4	1	2	1	0	0	0	54	72	58
15.0743	1	0	3	1	1	1	1	1	1	1	56	67	48
15.0989	1	3	2	1	0	1	1	2	0	2	53	67	57
15.1235	1	1	4	1	2	1	0	0	2	1	55	64	62
15.1481	2	2	1	1	2	2	0	0	3	1	61	45	63
15.1726	1	1	2	5	2	3	0	0	1	1	57	69	54
15.1972	1	0	2	2	0	2	1	1	1	0	65	70	62
15.2218	1	1	2	1	0	0	1	2	0	0	56	49	63
15.2464	1	4	1	0	0	1	0	1	2	2	67	64	57
15.271	1	2	0	1	1	2	0	1	1	0	73	64	53
15.2956	2	2	1	1	2	0	2	2	0	1	67	55	59
15.3202	0	0	4	3	0	0	1	1	0	1	59	67	76
15.3448	4	2	1	2	1	3	4	0	1	1	74	77	56
15.3694	2	0	2	2	0	1	2	1	1	0	51	84	47
15.394	3	0	3	3	2	0	2	1	0	1	65	66	63
15.4186	1	0	4	2	2	3	2	3	1	0	78	71	65
15.4431	0	3	2	2	2	1	4	0	0	0	71	63	70
15.4677	2	2	3	4	3	1	1	0	0	1	62	85	65
15.4923	0	2	1	5	3	0	1	1	0	1	70	72	74
15.5169	1	3	3	1	0	1	2	2	1	1	59	66	57
15.5415	2	0	4	1	1	2	2	0	1	2	74	85	68
15.5661	2	3	2	2	2	1	0	0	2	1	59	83	75
15.5907	1	1	4	0	1	1	5	1	0	2	79	83	83
15.6153	0	2	3	3	2	2	1	0	0	1	81	85	78
15.6399	1	3	5	2	3	2	1	0	0	0	93	101	107
15.6645	1	1	6	1	3	2	0	1	1	0	108	106	101
15.6891	2	1	4	1	3	1	0	3	1	4	107	125	116
15.7136	2	4	6	5	3	1	5	2	2	2	136	118	145
15.7382	1	4	5	5	0	3	4	0	1	0	137	124	149
15.7628	3	4	1	5	1	3	2	1	1	3	137	144	138
15.7874	1	4	4	5	2	2	1	0	2	1	147	134	164
15.812	2	5	4	5	3	3	1	2	2	0	113	149	125
15.8366	1	0	5	11	6	2	3	1	2	1	131	134	112
15.8612	3	4	4	3	1	2	2	2	0	1	120	115	124
15.8858	0	3	6	3	2	4	3	3	3	1	120	118	96
15.9104	0	2	4	4	5	1	2	0	1	1	104	97	96
15.935	2	2	4	2	2	1	1	1	0	0	86	108	84
15.9596	0	5	4	3	1	2	1	2	2	2	99	97	88
15.9841	1	2	1	4	4	3	2	2	0	2	103	78	101
16.0087	3	5	1	0	2	3	0	0	0	2	107	105	92
16.0333	0	1	6	5	2	1	0	1	3	2	86	89	97
16.0579	3	2	4	0	0	1	2	3	2	3	108	102	75
16.0825	2	2	3	0	5	2	3	3	1	2	102	100	125
16.1071	1	1	1	2	1	1	0	1	0	2	95	78	95
16.1317	0	3	1	3	2	4	3	3	1	1	79	95	88
16.1563	2	4	3	0	2	1	1	1	0	0	78	89	93
16.1809	5	5	0	3	0	0	3	0	2	1	73	90	82
16.2055	2	4	0	1	2	1	0	5	1	0	88	95	99
16.2301	2	4	2	2	1	1	2	1	1	2	109	86	73
16.2547	3	4	2	2	3	2	0	0	4	1	85	94	84
16.2792	2	8	3	0	4	2	1	0	1	0	84	100	100
16.3038	1	2	2	4	1	2	1	1	0	0	94	86	127
16.3284	3	3	1	1	1	3	3	2	1	1	82	94	81
16.353	2	2	5	5	5	2	3	0	2	0	80	95	92
16.3776	3	1	4	0	6	3	0	0	0	1	92	76	88
16.4022	0	2	6	2	3	2	2	1	4	1	78	93	94
16.4268	1	5	7	0	1	3	3	1	0	2	106	108	82
16.4514	1	0	0	8	0	4	3	2	2	2	115	76	89
16.476	1	6	4	1	0	1	3	1	0	1	106	89	102
16.5006	1	4	2	10	2	2	1	2	0	2	103	89	87
16.5252	0	2	3	1	1	3	5	1	0	0	95	99	96
16.5497	1	1	4	5	2	2	1	0	1	3	89	85	98
16.5743	0	1	4	3	7	3	3	1	0	0	99	106	87
16.5989	1	3	4	3	1	1	2	2	1	2	110	105	94
16.6235	5	2	3	2	3	2	1	0	0	0	88	104	88
16.6481	3	2	3	3	1	0	1	3	1	1	98	89	99
16.6727	2	3	5	5	2	2	2	1	3	1	103	100	107
16.6973	2	4	5	4	4	1	2	3	1	3	93	87	90
16.7219	1	4	6	1	3	1	0	0	0	0	102	107	106
16.7465	3	2	3	2	2	1	2	0	1	0	95	101	101
16.7711	1	0	2	3	2	2	1	0	0	0	101	108	107
16.7957	0	2	5	9	2	2	6	0	1	0	102	102	96
16.8202	0	4	6	4	2	3	1	2	1	0	108	100	104
16.8448	3	0	3	2	7	2	2	2	2	0	105	117	105
16.8694	1	4	2	3	3	2	3	1	0	1	118	127	112
16.894	1	3	9	6	0	0	0	3	1	2	112	99	104
16.9186	0	2	1	7	4	2	1	2	1	0	101	100	93
16.9432	2	5	6	3	4	4	4	3	4	0	120	110	126
16.9678	4	5	6	4	1	1	3	5	0	0	122	114	118
16.9924	2	5	2	5	2	0	1	1	1	2	108	119	98
17.017	2	5	3	1	3	1	5	1	0	1	103	105	76
17.0416	3	3	4	2	3	6	2	3	4	1	98	109	110
17.0662	0	4	1	4	3	0	0	1	1	0	115	98	108
17.0907	0	1	5	5	1	3	3	2	0	1	98	113	106
17.1153	3	5	6	3	3	4	0	1	0	0	110	117	108
17.1399	2	2	2	5	2	0	4	4	1	1	95	119	119
17.1645	2	1	1	7	1	4	1	2	1	2	115	110	110
17.1891	1	5	3	1	4	3	3	0	1	0	120	107	127
17.2137	3	4	3	8	3	2	3	1	3	0	104	122	131
17.2383	3	4	3	1	6	3	2	2	2	1	110	109	95
17.2629	1	4	4	3	6	5	3	1	0	4	109	106	89
17.2875	1	1	3	4	5	3	4	3	2	0	120	115	127
17.3121	0	3	9	2	1	1	1	0	0	2	113	119	115
17.3367	1	5	4	2	4	2	2	0	2	2	120	107	102
17.3612	1	4	7	3	1	4	0	3	1	0	132	109	135
17.3858	3	4	4	3	6	4	0	1	1	2	118	133	121
17.4104	1	4	3	4	6	2	4	2	2	2	114	119	119
17.435	4	2	0	3	1	3	3	4	2	0	117	113	125
17.4596	0	4	2	3	7	1	4	0	3	1	110	129	102
17.4842	0	1	5	4	1	3	3	2	1	3	141	110	116
17.5088	4	2	3	5	4	6	1	2	1	1	107	119	110
17.5334	0	2	4	3	5	3	1	4	4	3	100	116	123
17.558	0	6	3	3	4	3	0	3	4	2	102	150	126
17.5826	4	2	7	4	2	4	4	1	0	1	147	152	122
17.6072	1	5	2	5	2	2	6	3	1	2	120	123	120
17.6317	2	5	3	5	4	3	4	1	2	0	125	113	116
17.6563	2	8	2	6	4	3	6	2	3	0	117	144	115
17.6809	2	6	3	4	3	2	0	0	1	1	109	144	126
17.7055	2	3	6	2	1	2	2	1	2	1	126	138	135
17.7301	2	4	5	4	7	3	2	1	0	0	127	120	124
17.7547	4	7	1	4	6	4	2	1	1	0	111	125	125
17.7793	0	6	3	4	2	3	2	1	2	0	129	132	127
17.8039	1	4	3	5	2	2	4	2	1	2	133	137	140
17.8285	1	5	2	5	4	1	3	2	2	0	142	112	118
17.8531	2	5	2	0	3	1	1	4	2	1	151	114	133
17.8777	1	6	8	5	2	2	4	2	2	2	115	116	118
17.9022	2	4	6	7	2	3	4	1	1	3	127	128	127
17.9268	2	7	6	1	2	1	4	2	1	1	120	135	125
17.9514	1	4	1	4	2	2	1	3	1	1	125	123	122
17.976	2	6	5	4	6	4	2	1	1	0	120	129	122
18.0006	2	4	3	5	6	2	6	1	1	1	121	128	114
18.0252	1	2	4	4	5	1	2	2	2	3	111	129	127
18.0498	4	3	5	4	3	1	2	2	1	1	117	121	142
18.0744	3	4	2	4	6	0	3	2	0	3	122	139	120
18.099	0	6	6	7	3	0	0	2	3	1	135	139	133
18.1236	0	2	3	2	6	3	2	1	1	1	114	168	129
18.1482	3	3	4	5	4	3	2	1	1	0	134	100	112
18.1727	3	3	3	2	1	1	3	1	1	3	113	136	126
18.1973	0	5	6	2	3	0	4	0	2	1	114	144	137
18.2219	0	5	4	3	2	4	1	1	1	1	118	110	155
18.2465	5	3	3	6	2	5	7	4	2	3	126	138	156
18.2711	4	2	1	4	8	4	0	4	2	2	130	107	139
18.2957	4	4	5	4	1	7	9	2	3	2	125	115	134
18.3203	0	2	3	2	4	3	1	1	0	5	126	115	135
18.3449	3	2	5	7	2	7	2	2	3	0	121	126	127
18.3695	3	6	8	4	2	3	3	2	3	2	126	128	112
18.3941	3	2	8	0	6	0	2	1	0	0	132	133	100
18.4187	3	7	3	1	1	1	1	1	1	0	141	139	122
18.4432	2	2	4	4	6	5	1	3	2	3	141	122	129
18.4678	2	3	6	3	3	4	0	1	1	1	144	94	132
18.4924	0	2	7	7	4	2	2	4	2	3	130	124	132
18.517	0	3	3	5	6	5	3	3	2	4	134	131	109
18.5416	2	5	6	4	2	6	2	2	0	3	121	130	137
18.5662	1	3	4	3	3	0	0	1	2	2	137	123	140
18.5908	7	1	5	2	2	3	3	3	2	3	134	135	120
18.6154	1	1	8	5	4	5	2	1	2	2	139	125	120
18.64	3	2	5	4	1	1	2	3	0	4	139	143	145
18.6646	3	3	4	2	6	3	1	4	3	1	121	147	143
18.6892	0	7	2	1	5	4	2	3	1	1	149	148	124
18.7138	3	5	3	3	2	3	5	3	1	1	122	122	116
18.7383	3	6	6	4	5	4	0	1	2	2	120	136	124
18.7629	1	2	3	3	3	3	3	3	2	1	134	129	126
18.7875	0	3	3	5	6	2	0	1	0	1	137	142	126
18.8121	2	4	4	9	2	2	3	1	3	1	123	116	126
18.8367	2	4	7	3	2	4	3	3	2	4	112	119	127
18.8613	0	5	6	4	5	2	1	7	1	1	133	126	130
18.8859	1	6	5	4	3	4	3	3	2	2	144	119	129
18.9105	2	3	2	2	4	5	0	4	0	1	132	141	130
18.9351	3	5	5	7	2	1	4	3	2	0	150	159	134
18.9597	1	4	4	7	6	3	4	2	1	0	126	108	132
18.9843	0	7	3	3	2	5	1	1	0	3	122	141	148
19.0088	4	6	2	5	3	5	1	0	6	1	127	130	145
19.0334	0	4	3	3	3	5	7	2	3	2	145	132	164
19.058	2	3	5	3	6	4	1	0	1	4	133	148	132
19.0826	1	4	4	2	4	2	1	1	2	2	140	135	137
19.1072	2	6	4	7	1	4	3	2	3	3	127	157	137
19.1318	3	3	4	2	3	8	3	1	1	1	129	140	129
19.1564	1	4	6	2	5	4	2	5	1	0	123	142	139
19.181	2	1	7	5	4	2	2	3	4	0	131	124	151
19.2056	2	7	3	4	9	3	2	2	1	0	130	142	115
19.2302	4	8	5	6	5	3	3	1	1	1	134	129	144
19.2548	0	7	2	5	3	1	1	1	3	3	152	145	152
19.2793	4	3	9	6	3	2	4	2	2	2	146	136	141
19.3039	2	4	5	3	10	3	1	0	3	1	125	121	135
19.3285	1	3	4	2	4	4	2	0	1	1	139	151	138
19.3531	1	4	3	2	5	4	0	3	2	0	142	154	133
19.3777	2	6	6	3	0	3	0	2	1	1	127	131	125
19.4023	2	6	4	1	3	6	2	2	1	1	113	127	128
19.4269	1	6	5	6	2	0	3	2	0	1	135	151	160
19.4515	0	1	5	3	3	2	2	1	3	2	152	136	136
19.4761	2	3	2	3	6	2	5	1	1	2	125	128	133
19.5007	2	5	3	3	8	4	2	1	2	2	131	127	122
19.5253	4	2	2	5	2	2	2	3	0	2	135	122	147
19.5498	3	8	3	6	5	0	3	1	3	3	145	134	123
19.5744	2	5	9	5	4	3	3	5	2	4	120	148	142
19.599	2	5	5	4	4	5	2	4	2	2	133	127	133
19.6236	0	4	2	7	4	3	2	0	4	1	147	126	128
19.6482	0	1	2	9	5	1	0	4	3	4	136	132	149
19.6728	0	7	5	0	7	1	2	2	0	0	128	124	139
19.6974	0	4	6	5	2	2	1	3	3	1	135	119	122
19.722	3	10	3	2	2	3	3	1	0	1	142	134	136
19.7466	1	4	5	6	5	3	3	3	2	1	115	130	136
19.7712	1	4	3	1	6	9	2	1	3	0	138	141	132
19.7958	3	3	3	2	5	8	3	1	3	3	156	132	121
19.8203	4	6	2	4	4	3	4	4	3	2	151	121	146
19.8449	5	2	4	5	3	3	3	2	0	2	127	124	122
19.8695	5	5	5	4	3	1	3	3	1	2	109	154	128
19.8941	4	4	5	6	6	1	3	1	4	2	155	105	140
19.9187	0	3	7	3	2	4	2	3	3	3	131	134	124
19.9433	1	2	7	2	3	3	4	0	1	1	124	126	129
19.9679	3	5	11	7	7	1	3	4	1	2	136	144	161
19.9925	3	1	3	3	0	4	4	1	0	0	138	128	132
20.0171	1	4	6	10	2	1	3	3	1	4	146	138	134
20.0417	3	4	3	5	4	2	1	1	0	1	103	122	136
20.0663	1	9	3	4	7	5	1	2	4	3	134	116	126
20.0908	1	6	2	2	5	2	3	2	0	2	126	119	116
20.1154	2	1	5	4	2	3	0	2	4	2	102	115	138
20.14	2	2	3	0	2	3	2	1	1	1	117	116	106
20.1646	2	4	7	3	1	4	2	2	2	1	126	108	119
20.1892	2	2	3	3	5	3	7	0	0	2	146	120	131
20.2138	2	3	5	4	3	6	1	3	1	2	126	142	141
20.2384	3	1	3	2	3	2	3	6	2	0	125	123	105
20.263	0	3	3	6	2	2	2	0	1	2	113	121	146
20.2876	2	3	3	4	5	7	1	5	1	3	132	114	126
20.3122	2	6	5	2	1	7	4	3	2	0	118	112	138
20.3368	4	1	3	5	1	3	0	1	1	2	125	116	142
20.3613	6	5	4	6	7	1	3	1	0	3	123	124	131
20.3859	4	7	2	4	4	6	2	6	3	2	115	150	119
20.4105	0	2	0	6	4	4	3	3	1	1	123	137	97
20.4351	2	5	8	2	2	2	2	1	1	2	138	119	130
20.4597	1	4	2	5	2	2	1	1	4	2	114	116	128
20.4843	2	4	6	3	4	1	1	4	1	1	116	131	129
20.5089	4	1	3	4	0	1	3	2	2	5	105	105	114
20.5335	2	4	2	1	4	3	2	1	2	0	111	133	124
20.5581	4	1	3	3	4	2	1	1	1	3	123	131	116
20.5827	1	4	5	4	10	5	1	1	2	3	124	125	128
20.6073	2	4	5	4	2	4	3	3	3	3	114	111	126
20.6318	1	5	4	3	5	0	3	2	3	4	122	109	95
20.6564	3	1	6	7	1	4	4	2	2	1	119	129	130
20.681	3	1	5	4	5	1	1	1	3	3	119	106	111
20.7056	0	4	4	3	9	3	3	3	3	1	131	125	122
20.7302	3	2	2	8	3	3	8	1	1	2	118	116	136
20.7548	0	3	4	4	6	7	3	3	1	2	123	121	122
20.7794	1	6	5	4	4	3	2	2	2	0	126	109	133
20.804	6	2	8	8	2	2	3	2	1	2	109	143	119
20.8286	1	3	2	8	2	2	0	5	2	2	135	135	139
20.8532	2	2	5	2	8	4	3	3	0	3	109	117	110
20.8778	0	2	4	4	3	6	3	0	1	0	106	134	141
20.9023	1	2	5	6	5	2	1	2	5	2	95	116	130
20.9269	1	3	3	4	3	4	7	0	3	1	119	120	115
20.9515	1	6	0	4	2	5	1	1	0	1	135	141	124
20.9761	3	1	5	4	2	4	3	3	0	2	119	119	125
21.0007	1	3	2	3	3	2	4	0	3	1	105	124	109
21.0253	1	5	7	1	1	1	4	2	5	0	117	121	124
21.0499	2	2	3	2	5	7	3	1	1	3	128	112	126
21.0745	3	3	6	9	4	3	5	2	1	3	116	104	129
21.0991	0	3	6	6	6	3	3	3	5	3	110	103	119
21.1237	0	2	3	5	6	2	6	0	3	4	114	124	118
21.1483	2	1	3	3	1	6	2	3	0	2	119	117	112
21.1729	0	2	5	2	5	0	0	3	3	2	129	111	102
21.1974	1	5	6	5	2	0	3	2	2	6	125	105	109
21.222	3	1	0	6	1	2	0	1	1	3	107	113	125
21.2466	3	4	6	6	4	5	2	2	0	4	136	109	93
21.2712	3	1	3	9	2	2	2	3	2	1	134	87	131
21.2958	1	3	4	8	4	1	2	5	2	3	124	122	107
21.3204	3	7	3	2	3	4	0	1	3	0	99	112	137
21.345	1	3	1	2	2	2	2	2	0	4	142	100	107
21.3696	0	1	6	2	2	3	1	2	0	1	114	96	112
21.3942	0	7	5	9	1	3	2	2	1	0	96	119	124
21.4188	5	5	1	4	1	1	2	2	3	0	128	96	128
21.4434	1	2	8	4	6	0	1	3	1	3	113	108	105
21.4679	1	1	3	7	4	3	1	2	2	0	109	116	92
21.4925	1	6	3	6	4	2	3	3	1	2	89	124	123
21.5171	2	4	3	2	1	3	5	4	3	1	106	116	105
21.5417	4	1	4	4	3	1	3	0	5	3	98	91	94
21.5663	1	1	2	6	2	4	1	4	1	0	98	146	106
21.5909	2	6	4	1	5	4	2	1	2	1	113	108	114
21.6155	1	6	4	6	1	1	0	2	2	0	94	103	99
21.6401	0	1	2	6	3	3	0	1	2	1	96	105	115
21.6647	1	2	4	6	3	3	2	3	1	1	123	106	131
21.6893	4	3	3	8	1	4	1	3	1	1	101	101	123
21.7139	4	2	4	6	5	2	5	2	2	0	115	122	109
21.7384	2	4	6	5	3	2	2	4	1	1	93	100	89
21.763	1	3	4	5	2	0	1	1	1	0	106	107	116
21.7876	0	6	5	2	2	2	3	2	1	1	99	93	95
21.8122	2	0	7	3	4	0	6	2	2	1	111	116	101
21.8368	3	2	4	3	5	5	1	1	0	1	97	91	115
21.8614	1	3	2	6	2	4	2	0	4	2	121	106	96
21.886	0	2	5	2	6	3	2	1	2	3	94	119	102
21.9106	1	3	4	9	3	3	3	3	1	4	103	100	95
21.9352	2	5	2	2	4	3	1	4	1	2	99	85	107
21.9598	0	2	2	3	4	5	2	1	2	2	97	105	103
21.9844	1	2	5	1	2	4	3	2	1	1	91	95	106
22.0089	1	5	5	6	2	2	4	2	1	2	113	109	86
22.0335	0	4	3	1	2	3	7	3	1	0	100	129	115
22.0581	1	3	6	2	2	4	1	1	1	2	111	90	115
22.0827	1	0	2	5	2	0	5	2	2	0	111	109	118
22.1073	3	1	0	7	4	2	2	1	2	1	100	103	97
22.1319	1	1	2	2	4	1	2	4	4	2	100	93	97
22.1565	2	0	8	3	3	3	2	3	4	2	106	90	114
22.1811	1	2	1	3	2	0	1	2	2	0	110	106	90
22.2057	1	8	1	1	5	0	3	2	3	2	89	116	96
22.2303	1	3	4	4	5	5	2	4	2	1	99	113	89
22.2549	2	3	2	8	7	3	6	1	3	2	107	104	90
22.2794	1	3	3	5	6	4	1	1	2	0	95	82	97
22.304	4	2	3	3	0	2	2	1	5	0	108	98	107
22.3286	1	4	1	3	1	6	1	2	2	0	101	96	99
22.3532	2	2	6	1	2	1	2	2	3	5	106	93	93
22.3778	0	3	4	2	2	3	3	2	1	0	100	105	102
22.4024	0	4	3	3	3	3	1	6	2	1	116	74	107
22.427	2	3	3	2	6	3	2	1	1	0	80	101	95
22.4516	1	6	5	2	6	4	3	0	2	0	105	101	94
22.4762	0	3	3	3	1	8	1	2	3	2	90	107	88
22.5008	1	3	4	1	4	1	2	2	3	1	88	95	89
22.5254	0	1	5	4	5	3	1	1	1	2	93	93	80
22.5499	1	4	5	6	7	2	5	1	1	1	99	84	103
22.5745	4	0	1	3	2	1	1	4	2	0	100	91	87
22.5991	4	5	8	2	1	1	3	3	1	1	95	102	83
22.6237	2	4	0	6	3	4	3	3	3	1	87	80	92
22.6483	4	3	4	1	1	2	2	0	2	1	85	92	96
22.6729	0	1	2	2	1	1	1	2	1	1	89	90	74
22.6975	0	3	2	2	5	0	4	1	2	2	97	94	90
22.7221	2	2	2	3	3	3	0	5	0	0	77	96	86
22.7467	0	5	3	3	5	1	3	3	1	2	93	97	75
22.7713	0	2	4	4	2	2	2	2	1	2	98	93	83
22.7959	1	2	2	3	2	4	1	0	3	1	89	94	91
22.8204	3	2	2	2	5	6	0	2	1	0	89	90	99
22.845	0	4	3	5	4	1	2	3	1	2	101	89	83
22.8696	2	3	4	6	5	3	1	1	1	1	73	81	100
22.8942	0	3	3	3	0	0	2	4	0	3	79	100	78
22.9188	2	3	2	3	4	1	1	0	3	1	86	81	86
22.9434	3	0	2	2	4	0	5	1	1	2	78	88	81
22.968	2	4	3	1	2	1	3	1	2	0	93	72	90
22.9926	0	3	4	1	0	1	1	1	0	0	86	83	86
23.0172	2	2	1	0	3	1	0	1	1	2	75	62	103
23.0418	1	0	2	2	4	2	1	1	3	0	98	85	85
23.0664	1	4	1	7	4	2	1	1	4	0	88	73	73
23.0909	0	2	3	4	3	1	1	2	1	1	69	74	85
23.1155	0	4	3	7	1	1	1	1	1	1	81	79	72
23.1401	1	1	3	4	5	2	1	3	0	1	78	82	82
23.1647	3	1	1	5	3	0	3	0	1	4	90	82	92
23.1893	1	2	4	4	2	2	1	4	3	2	90	93	74
23.2139	1	2	2	3	5	3	4	1	3	2	85	89	94
23.2385	1	2	2	1	3	1	1	1	2	0	89	91	85
23.2631	0	1	4	2	1	2	1	1	3	1	67	83	93
23.2877	1	2	2	3	5	3	5	0	1	1	60	81	59
23.3123	1	1	3	7	4	0	3	0	4	2	85	80	82
23.3369	3	2	3	3	3	1	1	1	3	0	81	75	65
23.3615	3	1	2	3	0	1	2	2	1	1	72	84	91
23.386	2	4	4	2	1	2	3	0	0	3	89	79	74
23.4106	2	0	5	6	1	2	5	0	1	1	70	70	76
23.4352	3	1	4	2	5	2	1	2	1	2	80	76	74
23.4598	1	1	4	4	2	1	2	2	0	1	79	69	76
23.4844	0	1	2	3	5	1	1	3	0	2	87	84	63
23.509	0	3	1	6	5	5	3	2	0	0	80	89	58
23.5336	3	2	1	3	2	1	1	2	0	1	88	73	79
23.5582	1	2	4	3	3	2	2	0	2	1	85	66	72
23.5828	0	2	2	3	2	3	3	4	3	0	79	70	89
23.6074	2	3	1	4	5	4	3	2	2	1	87	75	83
23.632	1	2	3	2	1	2	2	2	3	1	85	75	80
23.6565	1	0	1	3	3	4	0	1	0	1	70	75	84
23.6811	0	0	2	3	3	2	2	0	1	1	69	69	68
23.7057	1	0	4	2	0	3	2	0	1	1	77	71	76
23.7303	1	4	3	5	2	1	4	0	1	0	72	79	71
23.7549	0	0	1	3	6	4	1	1	1	3	71	84	72
23.7795	5	1	0	2	1	0	2	3	1	3	69	63	88
23.8041	0	2	2	0	2	9	1	2	1	1	87	87	73
23.8287	1	4	5	3	4	0	3	1	1	2	91	69	72
23.8533	2	0	1	4	3	1	2	0	1	2	81	74	66
23.8779	4	0	6	3	2	3	2	3	2	2	60	68	73
23.9025	1	4	2	2	2	4	3	2	1	2	74	73	85
23.927	0	5	2	1	2	8	1	0	1	1	67	82	61
23.9516	2	1	3	1	5	3	1	1	1	2	57	89	54
23.9762	2	0	3	3	1	4	3	2	1	2	64	81	72
24.0008	0	0	1	1	2	2	4	1	2	0	66	83	60
24.0254	1	3	3	3	3	0	2	2	2	1	68	75	69
24.05	1	2	3	2	1	2	2	2	1	1	80	57	66
24.0746	2	1	5	1	3	0	1	2	0	0	54	82	60
24.0992	1	0	3	2	3	4	1	4	2	0	104	64	72
24.1238	4	1	0	2	6	2	0	0	1	0	70	70	60
24.1484	3	3	0	1	0	3	2	0	0	0	65	62	40
24.173	2	1	2	1	3	3	1	0	0	2	66	70	74
24.1975	4	1	3	1	1	1	1	1	1	1	72	67	78
24.2221	1	2	1	3	1	3	2	2	0	0	70	72	67
24.2467	1	3	3	3	1	1	2	0	1	1	70	62	68
24.2713	1	2	2	2	0	4	1	0	0	2	68	68	71
24.2959	1	2	1	4	2	1	0	3	1	1	63	72	64
24.3205	2	4	4	2	1	2	6	1	1	1	77	62	65
24.3451	1	2	1	1	0	1	5	2	0	3	60	58	63
24.3697	0	4	4	3	1	6	3	0	1	3	58	71	71
24.3943	1	0	4	3	4	1	3	2	0	0	59	69	66
24.4189	0	2	2	2	0	3	0	0	0	1	67	63	70
24.4435	0	1	0	4	3	0	0	0	0	0	58	58	73
24.468	1	2	3	1	0	2	2	1	0	1	52	68	62
24.4926	0	0	2	2	1	2	4	0	1	2	80	62	76
24.5172	3	1	2	3	6	2	0	0	2	0	59	63	59
24.5418	0	1	0	3	6	3	3	0	2	0	53	73	61
24.5664	2	2	2	4	3	1	2	1	3	0	72	67	57
24.591	1	0	3	7	1	3	2	1	2	0	66	56	52
24.6156	2	3	4	2	2	1	1	1	0	2	43	63	66
24.6402	1	2	2	3	0	1	1	2	1	0	59	76	57
24.6648	1	2	1	6	0	2	1	1	1	1	55	52	54
24.6894	1	0	4	1	1	4	1	2	0	1	73	64	60
24.714	4	0	3	6	3	1	3	0	2	0	59	34	65
24.7385	0	3	2	2	4	3	1	1	3	3	53	70	61
24.7631	0	1	1	0	1	3	2	2	0	0	56	47	64
24.7877	1	3	1	1	0	2	1	3	3	0	56	60	45
24.8123	1	2	2	5	0	1	1	2	0	2	65	50	62
24.8369	0	4	2	3	4	4	1	1	2	1	53	70	64
24.8615	0	3	2	3	0	2	2	0	2	0	68	64	54
24.8861	0	1	2	0	1	2	1	2	1	1	51	56	70
24.9107	1	1	3	3	3	4	1	1	1	0	67	54	59
24.9353	1	1	3	1	7	1	4	1	2	0	45	51	44
24.9599	1	5	2	4	3	0	0	4	1	0	43	70	64
24.9845	1	3	2	4	2	1	1	0	0	0	64	57	74
25.009	0	1	0	5	2	2	2	1	1	1	61	59	45
25.0336	0	0	2	1	0	0	4	4	0	0	49	54	54
25.0582	1	0	3	2	1	0	0	0	2	0	50	54	52
25.0828	0	2	3	1	0	2	2	2	1	1	42	47	41
25.1074	1	1	2	3	4	3	0	0	3	0	65	53	53
25.132	1	1	1	2	2	2	3	0	1	1	58	55	57
25.1566	0	0	5	0	4	0	3	4	1	2	55	56	51
25.1812	1	0	1	2	1	3	0	0	1	0	40	46	47
25.2058	0	1	2	0	1	1	2	2	1	3	53	66	61
25.2304	1	0	5	1	2	1	2	3	0	3	52	61	60
25.255	0	0	0	5	1	0	3	0	3	1	52	38	57
25.2795	1	0	0	3	4	4	0	1	2	3	51	43	57
25.3041	1	1	0	4	1	3	1	1	0	1	52	52	50
25.3287	0	2	2	1	0	0	0	2	0	1	56	64	54
25.3533	1	0	1	1	1	5	0	3	1	1	50	37	42
25.3779	1	1	2	1	3	0	1	2	2	0	70	42	49
25.4025	1	2	1	1	2	3	2	3	0	1	55	51	63
25.4271	0	0	0	2	2	1	1	3	0	0	70	61	56
25.4517	3	1	6	4	2	2	2	1	1	0	58	42	48
25.4763	2	1	0	4	1	0	1	3	2	0	56	58	60
25.5009	0	3	2	1	0	2	1	0	0	2	41	21	51
25.5255	0	0	4	3	2	1	0	1	1	0	51	51	46
25.55	1	3	1	1	1	3	1	0	3	1	42	40	48
25.5746	2	1	2	1	3	0	0	3	1	0	63	59	33
25.5992	0	2	2	8	1	1	3	2	1	0	51	67	37
25.6238	1	2	1	2	2	1	0	2	0	0	49	47	43
25.6484	0	1	2	1	3	1	0	4	1	0	55	45	46
25.673	2	1	3	0	0	2	1	0	1	0	43	48	51
25.6976	0	3	2	2	3	0	0	3	0	0	39	63	46
25.7222	2	1	2	2	0	1	1	0	0	0	37	43	51
25.7468	0	0	1	4	2	1	0	2	2	1	52	43	45
25.7714	0	1	2	4	1	0	2	0	0	0	48	61	47
25.796	0	1	1	2	3	1	1	3	0	1	37	47	36
25.8206	2	0	1	1	2	0	0	1	1	1	45	44	49
25.8451	0	0	3	1	1	1	0	1	2	1	41	50	47
25.8697	2	1	1	3	2	1	2	1	0	3	51	49	43
25.8943	0	3	0	2	1	0	1	1	1	0	58	46	43
25.9189	2	2	0	2	1	2	1	2	3	1	39	50	46
25.9435	1	0	0	5	0	3	1	0	2	1	58	38	45
25.9681	1	1	1	2	1	1	1	1	2	0	57	41	36
25.9927	2	1	1	1	1	2	2	2	1	0	44	52	45
26.0173	0	0	0	1	1	2	4	0	1	1	58	36	55
26.0419	2	1	1	3	3	1	1	1	3	1	51	38	39
26.0665	0	0	3	2	0	2	0	1	2	2	43	50	46
26.0911	2	5	3	3	3	1	1	1	0	2	45	51	47
26.1156	0	0	2	2	0	1	2	1	1	0	48	45	53
26.1402	2	0	0	2	2	0	2	1	2	0	34	36	44
26.1648	0	2	3	2	2	0	0	0	1	2	37	43	39
26.1894	2	1	1	1	1	0	3	0	1	0	39	52	43
26.214	1	0	2	2	2	0	6	2	0	0	42	38	48
26.2386	0	2	0	4	0	2	2	2	0	1	50	56	44
26.2632	2	1	2	1	0	1	0	2	0	3	41	38	37
26.2878	1	1	0	1	1	0	2	2	2	1	41	39	26
26.3124	1	2	0	0	1	0	2	2	0	1	45	38	52
26.337	2	0	0	1	3	1	1	0	0	2	50	32	35
26.3616	1	2	0	0	1	2	1	1	1	1	41	47	50
26.3861	2	0	0	3	4	2	2	1	2	1	48	32	38
26.4107	2	1	1	0	6	0	0	5	1	2	40	35	42
26.4353	1	1	0	1	1	0	0	1	0	0	53	41	35
26.4599	0	2	0	1	2	2	0	1	0	1	38	54	46
26.4845	0	0	1	1	0	2	1	1	1	1	38	34	52
26.5091	0	0	4	3	2	1	2	0	5	0	41	47	33
26.5337	0	2	2	3	1	0	1	1	2	0	31	28	36
26.5583	0	1	3	1	1	0	0	0	0	1	39	41	38
26.5829	1	1	4	3	1	0	1	0	1	1	36	40	34
26.6075	3	2	3	1	0	0	3	1	4	3	38	38	33
26.6321	0	0	2	0	0	0	0	1	2	0	34	46	30
26.6566	1	0	2	3	0	1	4	1	1	1	29	41	40
26.6812	0	0	3	1	3	3	2	1	1	1	43	51	42
26.7058	0	0	1	1	0	1	1	1	2	0	43	48	31
26.7304	0	0	3	1	2	2	0	0	0	0	40	31	32
26.755	0	0	1	0	0	2	2	1	0	2	42	32	34
26.7796	0	2	2	0	3	2	0	0	1	0	31	27	34
26.8042	1	0	2	1	0	0	1	0	2	0	45	36	37
26.8288	0	1	2	1	0	0	0	1	1	0	32	27	45
26.8534	1	1	1	1	1	1	0	2	1	1	43	27	36
26.878	2	0	2	0	0	2	1	0	2	2	55	41	38
26.9026	0	1	2	4	2	0	0	3	0	1	43	44	49
26.9271	0	0	0	0	0	1	2	1	0	0	40	40	33
26.9517	1	0	0	5	1	1	1	0	1	3	32	31	42
26.9763	1	0	1	3	2	1	2	2	1	1	42	38	36
27.0009	0	1	3	1	2	0	1	0	1	0	44	28	38
27.0255	1	1	3	2	0	1	0	0	0	3	30	43	29
27.0501	0	0	1	1	1	1	2	0	2	0	27	27	33
27.0747	1	1	0	4	1	1	1	0	0	0	34	47	43
27.0993	0	0	2	1	2	1	1	1	2	0	32	40	29
27.1239	0	5	1	3	2	1	0	0	1	0	37	30	34
27.1485	0	0	3	2	0	0	0	0	1	0	34	35	24
27.1731	0	1	2	1	1	4	1	4	0	2	34	42	44
27.1976	0	2	1	1	2	1	0	0	1	0	34	40	35
27.2222	1	0	1	0	1	0	1	0	0	0	28	33	37
27.2468	1	0	0	4	1	1	0	0	2	1	35	29	27
27.2714	1	1	0	0	1	0	4	0	2	0	41	35	37
27.296	2	0	0	1	2	1	2	1	0	0	19	31	25
27.3206	1	0	1	0	3	0	1	0	2	2	23	30	33
27.3452	0	2	2	0	0	2	0	0	1	1	41	36	35
27.3698	2	0	3	1	0	1	0	2	1	3	34	33	32
27.3944	1	0	2	0	2	1	2	2	0	0	33	33	28
27.419	0	0	1	0	2	1	2	1	0	3	25	34	35
27.4436	1	0	3	1	0	1	0	1	0	1	23	32	44
27.4681	0	4	1	2	0	0	1	0	0	1	29	36	37
27.4927	0	0	1	1	0	1	0	0	1	1	32	40	40
27.5173	1	2	0	1	0	2	0	1	0	0	23	31	27
27.5419	1	1	2	2	4	2	0	1	0	1	36	29	26
27.5665	0	0	1	0	2	0	0	0	0	0	22	36	28
27.5911	0	0	1	0	1	1	0	0	0	1	21	24	32
27.6157	0	0	3	0	1	1	0	1	0	0	31	28	27
27.6403	1	1	1	0	0	1	0	1	0	1	39	26	36
27.6649	0	1	0	4	3	3	1	3	2	1	33	37	40
27.6895	2	3	1	2	0	1	1	1	0	0	29	24	25
27.7141	0	1	2	0	1	1	1	1	0	0	32	40	36
27.7386	0	2	0	0	1	3	1	1	1	1	27	29	28
27.7632	0	1	1	2	2	3	1	4	1	1	28	29	28
27.7878	1	0	1	0	1	1	1	1	1	1	25	32	33
27.8124	0	0	1	1	0	1	0	1	2	0	33	33	26
27.837	0	0	1	0	1	0	1	1	0	0	29	30	25
27.8616	1	3	2	1	3	0	1	0	0	0	36	31	33
27.8862	0	1	0	2	2	2	1	1	0	0	27	28	37
27.9108	0	1	0	0	0	2	0	1	0	3	34	33	24
27.9354	1	0	1	4	1	1	0	0	0	2	25	25	31
27.96	0	2	3	3	1	1	0	1	2	1	23	25	31
27.9846	1	0	1	1	0	3	1	0	2	2	34	38	26
28.0091	0	2	0	1	1	0	1	0	0	0	30	35	20
28.0337	0	0	1	0	1	2	1	1	0	0	30	36	41
28.0583	1	2	0	1	4	1	1	0	0	1	29	23	24
28.0829	0	0	1	0	1	2	2	1	3	0	35	17	26
28.1075	0	0	1	1	0	4	0	1	0	0	41	22	23
28.1321	0	1	0	2	0	1	0	1	0	1	23	22	28
28.1567	0	0	1	0	1	0	0	0	0	0	25	31	34
28.1813	1	4	1	0	0	2	0	1	1	1	23	30	21
28.2059	2	3	2	3	1	0	2	0	0	1	26	20	30
28.2305	0	0	2	1	0	1	1	1	3	0	27	34	29
28.2551	0	0	0	2	0	2	2	1	1	0	28	30	23
28.2797	0	1	1	1	2	2	2	1	0	0	22	23	30
28.3042	0	1	1	1	2	0	2	0	0	0	31	28	25
28.3288	2	1	1	1	0	0	2	1	1	0	23	36	24
28.3534	0	2	1	0	0	2	0	1	1	1	34	23	21
28.378	1	1	1	1	2	2	0	0	1	0	25	26	25
28.4026	0	0	0	0	0	0	0	0	0	0	28	26	19
28.4272	0	0	2	4	1	0	0	0	1	2	28	22	26
28.4518	0	0	1	1	0	1	1	1	0	1	16	25	30
28.4764	0	0	0	1	0	1	0	0	0	0	22	22	22
28.501	0	1	2	2	1	1	3	2	0	0	29	27	28
28.5256	1	0	1	0	1	1	0	1	0	1	34	26	29
28.5502	1	0	2	1	1	2	0	1	1	0	28	15	25
28.5747	2	1	2	0	0	0	0	0	0	0	19	26	37
28.5993	0	0	0	0	1	0	1	0	0	0	30	26	15
28.6239	1	1	2	2	1	2	1	1	0	0	23	24	26
28.6485	0	0	1	0	0	0	1	2	1	0	35	35	35
28.6731	1	1	2	2	0	2	0	0	1	0	22	30	19
28.6977	1	0	2	0	0	0	2	1	1	0	25	22	30
28.7223	0	1	0	0	0	0	0	2	1	0	22	23	25
28.7469	0	3	2	2	1	1	0	1	0	0	19	24	19
28.7715	0	0	1	2	1	1	0	0	0	3	26	26	16
28.7961	0	2	1	0	0	1	0	1	0	0	28	17	13
28.8207	1	0	0	0	1	1	0	0	1	0	17	21	22
28.8452	1	0	0	3	1	0	0	0	0	1	28	18	31
28.8698	0	1	1	2	0	0	1	0	2	1	18	22	23
28.8944	0	1	1	0	2	2	0	0	0	0	21	22	25
28.919	0	1	1	3	2	0	1	0	0	0	20	21	22
28.9436	1	2	0	2	2	1	1	0	1	3	24	21	20
28.9682	0	0	1	1	1	0	1	0	0	2	20	24	18
28.9928	0	1	1	2	1	1	1	0	0	0	33	17	27
29.0174	0	0	0	0	1	1	1	3	2	0	27	26	15
29.042	0	0	0	1	3	2	1	1	0	0	21	27	23
29.0666	0	0	1	0	0	0	2	1	0	1	22	21	20
29.0912	1	3	0	0	0	2	0	0	1	0	24	26	18
29.1157	0	0	0	0	1	0	1	2	0	0	20	19	13
29.1403	0	0	0	1	2	0	1	0	0	0	26	20	26
29.1649	1	1	0	0	0	2	1	1	1	0	16	20	20
29.1895	1	0	2	1	1	0	0	0	0	1	21	24	20
29.2141	1	0	1	0	1	0	0	2	0	1	20	18	18
29.2387	0	1	0	0	1	2	0	0	0	1	19	20	27
29.2633	1	0	2	0	1	0	0	2	1	0	19	30	20
29.2879	0	1	1	1	0	1	0	1	2	1	21	32	19
29.3125	0	1	0	1	1	1	0	1	0	0	14	20	23
29.3371	1	0	0	1	1	0	1	0	1	1	24	16	19
29.3617	0	0	0	0	2	0	1	1	1	0	19	19	21
29.3862	0	0	0	0	0	2	1	0	1	0	17	17	15
29.4108	0	0	0	1	0	1	0	0	1	0	23	20	23
29.4354	0	0	1	0	1	1	1	1	2	0	19	21	19
29.46	1	1	1	1	0	0	0	0	0	1	18	23	10
29.4846	0	0	2	1	0	2	2	1	1	2	15	19	22
29.5092	1	1	1	1	0	0	0	0	0	0	17	19	12
29.5338	0	2	0	0	0	0	0	1	0	0	14	21	33
29.5584	0	0	0	2	1	0	0	2	0	0	18	20	16
29.583	0	1	0	3	0	2	0	0	1	0	12	17	20
29.6076	1	2	1	2	1	1	3	0	0	0	15	17	17
29.6322	1	3	1	1	1	1	0	1	0	0	27	18	21
29.6567	1	0	0	2	1	2	1	0	0	2	13	13	24
29.6813	1	0	0	1	1	2	0	0	0	0	21	14	21
29.7059	1	0	1	1	0	0	0	1	1	1	20	16	16
29.7305	0	0	0	1	0	0	1	0	0	1	21	15	20
29.7551	2	0	1	2	2	0	0	0	0	0	13	17	14
29.7797	1	0	1	0	1	0	1	0	1	2	21	12	16
29.8043	1	1	1	0	2	1	1	1	0	0	19	23	19
29.8289	0	1	1	0	2	0	0	1	0	0	17	21	25
29.8535	0	2	2	3	0	2	0	0	0	1	17	21	14
29.8781	0	0	1	1	2	0	0	0	0	0	12	24	17
29.9027	0	0	0	1	0	0	1	0	3	0	26	11	23
29.9272	1	0	1	0	2	0	1	0	1	0	26	16	15
29.9518	0	0	1	0	1	0	0	0	0	0	18	18	20
29.9764	0	1	0	0	1	1	0	0	0	1	15	13	15
30.001	1	1	1	0	0	0	0	0	0	0	15	16	14
30.0256	0	0	0	1	0	1	0	2	1	0	12	16	20
30.0502	1	1	3	0	0	1	0	0	0	0	20	15	21
30.0748	0	0	0	2	0	1	0	0	0	2	15	23	15
30.0994	0	0	1	1	0	3	0	0	0	1	16	19	13
30.124	0	2	0	2	0	2	1	0	0	0	19	17	12
30.1486	0	0	1	0	0	0	1	0	0	0	10	12	18
30.1732	1	0	1	0	1	0	1	0	0	0	18	11	18
30.1977	2	0	1	1	1	1	1	0	0	0	15	17	10
30.2223	0	3	0	1	1	0	0	0	0	1	15	14	8
30.2469	0	0	1	0	1	1	0	0	0	0	18	12	19
30.2715	2	1	1	1	0	0	0	1	1	0	16	10	22
30.2961	0	1	1	0	1	0	1	2	1	0	16	17	6
30.3207	0	0	0	1	0	0	1	2	4	0	23	20	8
30.3453	0	0	0	3	3	0	0	0	0	0	19	14	22
30.3699	0	0	0	1	0	0	0	0	0	0	19	15	9
30.3945	2	0	0	1	1	0	0	1	0	0	14	16	17
30.4191	0	1	3	1	1	0	1	0	0	0	10	16	10
30.4437	1	0	0	0	1	0	0	0	1	1	21	8	20
30.4682	0	1	0	1	1	0	0	0	0	1	10	20	16
30.4928	0	0	0	0	0	1	0	0	0	1	11	14	11
30.5174	0	1	0	1	1	0	0	2	0	0	16	14	15
30.542	1	1	0	0	0	0	3	1	1	0	21	16	10
30.5666	0	1	0	2	0	0	0	1	0	0	16	6	12
30.5912	0	0	1	0	1	0	0	0	1	0	11	15	13
30.6158	0	1	0	1	0	0	0	1	1	0	12	14	10
30.6404	1	0	0	1	1	0	1	0	0	1	18	17	15
30.665	0	0	0	0	0	1	0	0	0	1	9	15	10
30.6896	2	0	0	0	3	1	0	2	0	0	16	16	9
30.7142	0	0	1	0	0	1	0	1	0	0	14	17	12
30.7387	1	0	0	1	0	1	2	2	0	0	13	16	15
30.7633	0	0	1	1	1	0	0	0	0	0	7	10	11
30.7879	0	1	0	1	1	0	1	0	0	0	14	16	11
30.8125	0	0	1	0	0	0	1	0	0	0	12	6	21
30.8371	0	1	1	0	0	1	0	0	0	0	17	15	17
30.8617	0	1	1	0	1	0	0	0	0	0	11	18	12
30.8863	0	1	0	0	0	0	0	0	0	0	11	14	13
30.9109	0	2	0	0	1	0	2	0	0	0	12	9	13
30.9355	1	0	1	2	0	0	1	0	0	1	19	16	17
30.9601	0	0	0	1	1	0	0	0	0	1	6	20	7
30.9847	0	0	0	0	3	0	0	1	1	0	13	13	10
31.0093	0	1	1	1	1	0	0	0	0	0	16	11	8
31.0338	1	0	0	0	0	1	0	0	0	0	15	13	10
31.0584	0	0	0	0	1	1	0	0	1	1	11	15	8
31.083	0	1	0	2	0	1	1	0	1	0	13	14	16
31.1076	1	1	2	1	1	1	1	2	0	0	16	19	9
31.1322	0	1	1	0	0	1	0	0	1	1	8	12	11
31.1568	1	0	0	0	2	0	1	2	0	0	14	9	8
31.1814	0	0	0	0	3	0	0	0	0	0	13	21	6
31.206	1	1	2	1	2	0	0	0	0	0	13	20	14
31.2306	0	0	0	1	0	1	0	0	1	0	7	14	16
31.2552	0	1	0	1	1	0	0	0	0	0	17	9	11
31.2798	0	0	0	1	1	0	2	1	0	0	14	10	8
31.3043	0	0	0	1	0	2	0	0	0	0	12	12	9
31.3289	0	0	1	0	0	1	1	0	0	2	10	9	14
31.3535	0	0	0	1	1	1	1	1	0	0	15	16	13
31.3781	0	0	0	0	0	1	0	0	0	0	11	19	13
31.4027	0	0	0	0	1	0	0	0	1	0	13	13	24
31.4273	2	0	0	0	0	0	0	0	0	0	13	10	14
31.4519	1	0	0	0	2	1	1	0	0	0	16	17	16
31.4765	0	0	0	1	1	0	0	0	0	0	11	13	17
31.5011	0	0	3	0	1	0	1	0	0	0	14	12	12
31.5257	0	0	0	0	1	0	1	0	0	2	10	17	15
31.5503	0	0	0	0	1	0	0	1	0	1	12	6	17
31.5748	0	1	2	0	0	0	0	1	0	2	15	12	9
31.5994	0	0	0	0	0	1	0	0	1	0	12	10	13
31.624	0	0	1	0	2	0	0	0	0	0	20	10	15
31.6486	0	0	0	1	0	3	1	0	0	0	14	13	9
31.6732	0	0	0	1	0	1	0	0	0	1	15	21	14
31.6978	0	0	1	0	0	0	1	1	2	0	11	13	14
31.7224	1	0	0	1	1	1	0	1	0	0	9	21	22
31.747	0	1	0	1	1	1	1	1	0	0	13	12	11
31.7716	1	0	0	1	0	0	0	1	1	0	11	15	10
31.7962	0	0	0	0	0	3	1	0	0	0	11	16	16
31.8208	0	1	1	0	1	0	1	0	0	0	10	15	13
31.8453	1	3	0	0	0	1	0	0	0	1	9	12	8
31.8699	0	1	0	2	1	1	0	0	0	0	15	7	7
31.8945	0	0	0	1	1	1	0	1	0	0	5	12	16
31.9191	0	0	0	0	0	0	0	0	0	1	14	16	8
31.9437	0	1	0	0	0	0	1	0	0	0	13	12	9
31.9683	0	3	1	0	0	0	1	1	0	0	16	12	8
31.9929	0	0	0	0	1	0	1	0	1	0	7	15	17
32.0175	0	0	0	0	0	0	0	0	0	1	18	16	7
32.0421	1	0	1	0	1	1	0	0	1	0	7	15	12
32.0667	0	2	0	1	0	0	0	0	0	0	17	20	12
32.0913	0	1	1	0	0	0	0	0	0	0	17	9	11
32.1158	0	1	1	1	0	0	1	0	0	0	9	13	11
32.1404	0	0	2	1	0	0	0	0	0	1	10	9	15
32.165	0	0	0	0	0	1	0	0	0	0	10	10	9
32.1896	0	0	0	1	0	0	0	0	0	0	8	10	10
32.2142	1	0	0	0	2	0	0	0	0	0	12	10	15
32.2388	0	0	1	0	0	0	2	1	0	1	12	11	12
32.2634	0	0	1	2	1	1	0	0	0	1	11	5	9
32.288	0	0	0	1	0	0	0	1	0	1	7	8	8
32.3126	0	0	0	0	0	0	1	1	0	0	11	16	16
32.3372	0	0	0	0	0	0	0	0	0	0	9	9	12
32.3618	0	0	0	0	0	1	0	0	0	0	6	15	10
32.3863	0	0	0	0	2	1	0	0	0	0	14	7	9
32.4109	1	1	0	0	0	0	0	0	0	1	10	11	7
32.4355	1	0	0	0	0	0	0	0	0	1	10	13	8
32.4601	1	0	0	0	0	0	0	0	0	1	13	14	11
32.4847	0	0	1	2	0	0	0	0	0	0	11	6	6
32.5093	0	0	1	1	2	1	0	0	0	0	10	9	10
32.5339	1	0	0	0	0	0	0	0	0	1	11	13	6
32.5585	0	0	1	1	0	2	0	0	0	1	10	9	7
32.5831	0	0	0	1	1	0	0	0	0	0	12	13	13
32.6077	0	0	0	0	0	1	0	0	2	0	11	5	9
32.6323	0	0	1	1	1	0	0	0	0	0	6	18	8
32.6568	1	0	0	0	0	1	0	0	0	0	10	9	6
32.6814	0	0	0	0	0	0	0	1	0	0	9	9	11
32.706	1	0	0	0	1	0	1	1	0	1	9	10	10
32.7306	0	2	0	2	2	0	0	0	0	0	9	12	5
32.7552	0	0	0	1	0	0	0	0	0	2	10	10	7
32.7798	0	0	0	1	1	1	0	0	0	0	7	10	4
32.8044	0	0	1	0	0	0	0	0	1	1	7	5	8
32.829	0	0	0	0	0	1	0	0	0	0	7	7	3
32.8536	1	0	1	0	0	0	0	0	0	0	8	8	8
32.8782	0	1	0	2	0	1	0	0	0	2	6	9	13
32.9028	1	0	1	1	0	1	0	1	0	1	9	6	6
32.9273	0	0	0	0	1	0	0	0	0	0	5	7	5
32.9519	1	0	0	0	1	1	0	0	0	0	14	3	5
32.9765	0	0	0	0	1	1	1	0	0	1	8	9	7
33.0011	0	0	0	0	1	0	1	0	0	0	3	10	5
33.0257	0	0	0	0	0	0	0	0	0	0	11	12	3
33.0503	0	0	0	0	0	0	0	1	1	0	6	9	13
33.0749	0	0	1	0	0	0	0	0	0	2	13	8	13
33.0995	0	0	0	1	0	1	1	0	0	0	7	9	7
33.1241	0	0	1	0	0	0	2	0	0	0	4	9	3
33.1487	0	0	0	0	1	0	0	1	0	0	5	5	3
33.1733	0	0	0	0	0	0	1	1	0	0	14	10	7
33.1979	0	0	1	1	1	0	0	0	0	0	3	9	4
33.2224	0	0	1	0	0	0	1	0	0	0	13	5	3
33.247	0	0	0	0	1	0	0	0	0	0	8	5	8
33.2716	0	0	0	0	0	0	0	0	0	0	8	4	6
33.2962	0	0	0	0	2	1	1	0	0	0	5	4	2
33.3208	1	0	1	1	0	1	0	0	1	0	8	8	10
33.3454	0	0	0	0	0	0	0	0	0	1	14	10	9
33.37	0	0	1	1	1	0	0	0	0	0	6	10	6
33.3946	0	0	1	0	1	1	1	0	0	0	5	8	10
33.4192	0	0	0	0	0	0	0	0	0	1	4	8	7
33.4438	0	0	0	0	0	0	0	0	0	0	8	12	8
33.4684	0	0	0	1	0	0	0	0	0	0	9	4	5
33.4929	0	0	0	0	0	0	0	1	0	0	12	12	5
33.5175	0	0	0	1	0	0	1	0	0	0	8	5	9
33.5421	0	0	1	0	2	0	0	0	1	0	6	7	11
33.5667	0	1	1	1	1	0	0	0	0	1	9	8	8
33.5913	0	0	0	0	0	1	1	0	0	1	5	7	9
33.6159	0	0	0	1	0	1	1	0	0	0	14	6	6
33.6405	0	1	1	0	0	0	0	0	0	0	2	10	6
33.6651	0	0	0	3	0	0	0	1	0	0	5	7	8
33.6897	1	0	0	0	0	0	0	0	3	0	6	6	11
33.7143	0	0	0	0	0	0	0	0	1	1	6	5	4
33.7389	2	0	0	0	0	0	0	0	1	0	6	10	6
33.7634	0	0	0	0	0	1	0	0	0	1	5	6	10
33.788	0	0	0	0	1	0	0	0	0	0	7	2	6
33.8126	0	0	0	0	1	2	0	0	0	0	5	3	8
33.8372	0	0	0	1	2	0	0	1	0	0	15	6	10
33.8618	0	0	1	0	1	0	0	0	0	0	4	7	4
33.8864	0	0	1	0	1	0	0	0	0	0	3	6	10
33.911	0	0	0	0	0	0	0	0	0	0	9	5	3
33.9356	0	1	2	0	0	0	0	1	0	0	8	1	6
33.9602	1	0	0	0	0	0	0	0	0	0	6	4	5
33.9848	0	0	0	1	1	0	0	0	0	0	11	5	6
34.0094	0	0	0	1	0	1	0	0	0	0	5	8	6
34.0339	0	0	0	0	0	0	1	0	0	1	6	2	4
34.0585	0	0	0	0	0	0	1	0	0	0	3	5	3
34.0831	0	0	0	0	0	0	0	0	0	0	5	5	5
34.1077	0	0	0	0	0	1	0	0	0	0	7	5	8
34.1323	0	0	1	0	0	1	0	0	0	0	3	8	5
34.1569	0	0	0	0	0	0	0	0	0	0	6	4	9
34.1815	0	0	1	0	0	0	0	0	0	1	4	8	6
34.2061	0	0	0	1	1	1	0	0	1	0	3	5	5
34.2307	0	0	0	0	0	0	0	1	0	0	6	5	4
34.2553	0	0	0	0	0	0	0	0	0	0	7	7	5
34.2799	1	1	0	0	0	0	0	0	0	1	4	3	4
34.3044	1	0	0	0	0	0	0	0	1	0	2	11	10
34.329	0	0	0	0	0	0	0	0	0	0	4	4	8
34.3536	0	0	0	0	0	0	0	0	0	0	2	8	2
34.3782	0	1	0	0	0	0	0	0	0	0	7	7	7
34.4028	0	0	0	0	0	0	0	1	0	0	6	11	6
34.4274	1	0	0	0	1	0	0	0	0	0	4	6	4
34.452	0	0	0	0	0	1	1	0	1	0	2	5	1
34.4766	0	0	1	0	0	0	1	0	0	0	5	4	7
34.5012	0	0	0	1	0	1	1	0	0	0	3	5	7
34.5258	0	0	0	0	0	0	0	0	0	0	6	4	4
34.5504	0	0	0	0	1	0	0	0	1	0	3	4	6
34.5749	0	0	1	0	0	0	0	1	1	0	6	3	2
34.5995	0	0	0	0	0	0	1	0	2	1	9	3	5
34.6241	0	1	0	0	0	0	0	0	0	1	3	3	2
34.6487	0	0	0	1	1	0	0	1	1	0	4	4	4
34.6733	0	0	0	0	0	0	0	0	0	0	2	9	8
34.6979	0	0	0	0	0	0	0	0	0	0	4	5	5
34.7225	0	0	0	0	0	0	0	0	0	0	2	2	6
34.7471	0	0	0	0	0	0	0	0	0	0	6	10	8
34.7717	0	0	0	0	0	0	0	0	0	0	4	8	3
34.7963	0	0	0	0	0	0	0	0	0	1	11	3	5
34.8209	0	0	0	1	0	0	0	1	0	0	1	2	3
34.8454	0	0	0	0	1	0	0	0	0	0	6	3	5
34.87	1	0	0	1	0	0	0	0	0	0	6	3	4
34.8946	1	0	0	0	0	0	0	0	0	0	3	6	5
34.9192	0	2	0	0	0	0	1	1	0	0	7	6	5
34.9438	0	0	0	0	1	1	0	0	0	0	2	8	3
34.9684	0	0	0	0	0	0	0	0	0	1	2	5	4
34.993	0	0	0	0	0	0	0	0	1	0	0	2	7
35.0176	0	0	0	0	0	1	0	0	0	0	1	4	6
35.0422	0	0	0	0	0	1	0	0	0	1	3	7	5
35.0668	0	0	2	1	0	0	0	0	0	0	6	1	6
35.0914	0	0	0	0	0	0	0	0	0	1	6	7	4
35.1159	1	0	0	0	0	1	0	0	0	1	4	3	1
35.1405	0	1	0	0	0	0	0	1	0	1	4	3	5
35.1651	0	0	0	0	1	0	0	0	0	0	3	3	6
35.1897	0	0	2	0	0	0	0	0	0	0	1	1	3
35.2143	0	0	0	1	0	0	0	1	0	0	1	4	2
35.2389	0	0	0	0	0	0	0	0	0	0	8	2	3
35.2635	0	0	0	0	0	0	0	0	0	1	2	7	6
35.2881	0	0	0	0	0	0	1	0	0	0	5	1	3
35.3127	0	0	1	0	0	0	0	0	0	0	2	4	2
35.3373	0	0	0	0	0	0	0	1	0	0	4	6	7
35.3619	0	0	1	0	0	0	0	0	0	0	5	3	7
35.3864	0	1	0	0	0	0	0	0	0	0	4	3	5
35.411	0	0	0	0	1	1	0	0	0	0	4	7	3
35.4356	0	0	0	0	1	0	0	0	0	0	2	6	3
35.4602	0	0	0	0	0	1	0	0	1	0	1	4	7
35.4848	0	0	1	2	0	0	1	0	0	0	6	0	1
35.5094	1	0	0	0	0	0	0	0	0	0	5	8	5
35.534	0	0	0	0	0	0	0	0	1	0	3	6	6
35.5586	0	0	0	0	0	0	0	0	0	0	3	1	4
35.5832	0	1	0	0	0	1	0	0	1	0	1	5	6
35.6078	0	0	0	2	0	0	0	0	1	0	1	6	2
35.6324	1	0	0	0	0	1	0	0	0	0	2	4	3
35.657	0	1	0	0	0	0	1	0	0	0	2	3	6
35.6815	0	0	0	0	0	0	0	0	0	1	3	5	3
35.7061	0	0	0	0	1	1	0	0	0	0	2	3	3
35.7307	0	1	0	0	0	0	0	0	0	0	3	6	1
35.7553	0	0	0	0	0	0	0	0	0	0	3	1	4
35.7799	0	0	0	0	0	0	0	0	0	0	3	2	8
35.8045	0	0	0	0	0	1	0	0	0	0	3	5	4
35.8291	0	0	0	1	0	0	0	0	0	0	3	2	2
35.8537	0	0	0	0	0	0	0	0	0	0	1	7	5
35.8783	0	0	0	0	0	2	1	0	0	0	3	3	4
35.9029	0	0	0	0	0	0	0	0	0	0	6	4	4
35.9275	1	0	2	0	0	0	0	0	0	0	3	1	1
35.952	0	0	0	0	0	0	1	0	0	0	4	2	3
35.9766	0	0	0	0	0	0	0	0	0	0	3	5	3
36.0012	0	0	0	0	0	0	0	0	0	0	1	5	1
36.0258	1	0	0	0	0	0	0	0	1	0	7	3	4
36.0504	0	0	0	0	0	0	0	0	0	0	4	3	2
36.075	0	0	0	0	0	0	0	0	0	1	1	4	5
36.0996	0	0	0	1	0	0	0	1	0	0	8	4	5
36.1242	0	1	0	0	0	0	0	0	0	0	4	6	3
36.1488	0	0	0	1	0	0	0	0	0	1	3	1	8
36.1734	0	0	1	0	1	0	0	0	0	0	4	2	6
36.198	0	0	0	0	0	0	0	0	1	0	2	2	6
36.2225	0	1	0	0	0	1	1	2	1	0	0	6	4
36.2471	1	0	1	0	0	0	0	0	0	0	3	3	4
36.2717	0	0	0	0	0	1	1	0	0	0	3	5	2
36.2963	0	0	0	0	0	0	0	0	0	0	6	4	2
36.3209	0	0	0	0	0	0	0	0	0	0	2	5	4
36.3455	0	0	0	0	0	0	1	0	0	0	2	6	1
36.3701	0	0	0	2	1	0	1	0	0	0	5	4	1
36.3947	0	0	0	0	0	0	0	0	1	0	2	5	5
36.4193	0	0	0	0	0	0	0	1	0	0	3	4	3
36.4439	0	0	0	1	0	1	0	0	0	0	1	5	2
36.4685	0	0	1	0	1	0	0	0	0	0	1	2	5
36.493	0	0	0	0	0	0	0	0	0	0	3	4	3
36.5176	0	0	0	0	0	0	0	0	0	1	2	1	3
36.5422	0	0	0	0	0	1	1	0	0	0	5	2	0
36.5668	0	0	0	0	0	0	0	0	0	0	4	2	2
36.5914	0	0	0	0	0	0	0	0	0	0	3	4	2
36.616	0	0	0	0	0	0	0	0	0	0	2	5	1
36.6406	0	0	0	0	0	0	0	0	0	0	0	0	5
36.6652	0	0	0	0	0	0	0	0	0	0	4	1	2
36.6898	0	0	0	0	1	0	0	0	0	0	3	3	2
36.7144	0	1	0	0	0	0	1	0	0	0	2	0	5
36.739	0	0	3	0	0	0	0	2	0	0	3	3	1
36.7635	0	0	0	0	0	0	0	0	0	0	3	6	1
36.7881	0	0	0	0	0	0	0	0	0	0	3	3	2
36.8127	0	0	1	1	1	2	1	0	0	0	4	5	1
36.8373	0	0	0	0	0	0	0	0	0	0	2	5	4
36.8619	0	0	0	0	1	0	0	1	0	0	4	3	4
36.8865	0	0	0	0	0	0	0	0	0	0	0	2	2
36.9111	0	0	0	0	0	1	0	0	0	0	5	3	2
36.9357	0	0	0	0	0	0	0	0	0	0	3	3	3
36.9603	0	0	0	0	0	0	0	0	0	0	2	1	4
36.9849	0	1	0	0	0	0	0	0	0	0	2	2	4
37.0095	1	0	0	1	0	0	0	0	0	0	3	6	3
37.034	0	0	0	0	0	0	0	0	0	0	2	2	3
37.0586	0	0	0	0	1	0	0	0	0	0	2	2	3
37.0832	0	0	0	0	0	0	0	0	0	0	1	6	2
37.1078	0	0	0	0	0	0	0	0	0	0	1	4	2
37.1324	0	0	0	0	1	0	0	0	0	0	3	1	2
37.157	0	0	0	0	0	0	0	0	0	0	2	0	1
37.1816	0	1	1	0	0	0	0	0	0	0	2	2	1
37.2062	0	0	0	0	0	0	0	0	0	0	2	2	3
37.2308	0	0	0	1	0	0	0	0	0	0	1	2	1
37.2554	0	0	0	0	0	0	0	0	1	0	0	3	4
37.28	0	0	0	0	0	0	0	0	0	0	2	1	0
37.3045	0	0	0	0	0	0	0	0	0	0	5	3	3
37.3291	0	0	0	0	0	0	0	0	0	0	0	3	4
37.3537	0	0	0	0	0	0	0	0	0	0	5	4	2
37.3783	0	0	0	0	0	0	0	0	0	0	1	0	2
37.4029	0	0	0	1	0	0	0	0	0	0	1	3	0
37.4275	0	0	0	1	0	0	0	0	0	0	3	3	2
37.4521	0	0	0	0	0	0	0	1	0	1	5	1	1
37.4767	0	1	0	0	0	0	0	0	0	0	2	0	4
37.5013	0	0	0	0	0	0	0	0	0	0	2	0	0
37.5259	0	0	0	0	0	0	0	0	0	0	1	3	4
37.5505	0	0	0	0	2	0	0	0	0	0	0	2	3
37.575	0	0	0	0	0	0	0	0	0	0	4	3	3
37.5996	0	1	0	0	0	0	0	0	0	0	2	3	1
37.6242	0	0	0	0	0	0	0	0	0	1	4	2	1
37.6488	0	0	0	0	0	0	0	0	0	0	3	3	3
37.6734	0	0	0	0	0	0	0	0	0	0	3	5	0
37.698	0	1	0	0	0	0	0	0	0	0	1	0	2
37.7226	0	1	0	0	0	0	0	0	0	0	1	2	0
37.7472	0	0	0	0	0	0	0	0	0	0	3	1	0
37.7718	0	0	1	0	0	0	1	0	0	0	3	1	1
37.7964	0	0	0	0	0	0	0	0	0	0	1	4	0
37.821	0	0	0	0	0	0	0	0	0	0	0	0	2
37.8455	0	0	0	0	0	0	0	0	0	0	1	6	3
37.8701	0	0	0	0	1	0	0	0	0	0	0	2	1
37.8947	0	0	0	0	0	0	0	0	0	0	1	0	1
37.9193	0	0	0	1	0	0	0	0	0	0	0	2	1
37.9439	0	0	0	0	0	0	0	0	0	0	2	2	3
37.9685	0	0	0	0	0	0	0	0	0	0	1	2	1
37.9931	0	0	1	0	0	1	0	0	0	0	0	0	3
38.0177	0	0	0	0	0	0	0	0	0	0	2	3	2
38.0423	0	0	0	1	0	0	0	0	0	0	3	0	1
38.0669	0	0	0	0	0	0	0	1	0	0	4	1	0
38.0915	0	0	0	0	0	0	0	0	0	0	2	2	1
38.1161	0	0	0	0	0	1	1	1	0	0	1	3	1
38.1406	0	0	0	0	0	0	0	0	0	0	1	3	1
38.1652	0	0	0	0	0	0	0	0	0	0	6	1	4
38.1898	0	0	0	0	1	0	0	0	0	1	1	3	3
38.2144	0	0	0	0	0	0	1	0	0	0	4	0	0
38.239	0	0	0	1	0	0	0	0	0	0	3	2	2
38.2636	0	0	0	0	0	0	0	0	0	0	1	1	1
38.2882	0	0	0	0	0	0	0	0	0	0	3	1	5
38.3128	0	0	0	0	0	0	0	0	0	0	1	3	3
38.3374	0	0	0	0	0	0	0	0	0	0	2	2	2
38.362	0	0	0	0	0	0	0	0	0	0	1	2	4
38.3866	0	0	1	0	0	0	0	0	0	0	2	4	1
38.4111	0	0	0	0	0	0	0	0	0	0	1	1	2
38.4357	0	0	0	0	0	0	0	0	0	0	4	3	1
38.4603	0	0	0	0	0	0	0	0	0	0	3	0	2
38.4849	0	0	0	0	0	0	0	0	0	0	2	3	4
38.5095	0	0	0	0	0	0	0	0	0	0	5	4	0
38.5341	0	0	0	0	0	0	0	0	0	0	0	3	2
38.5587	0	0	0	0	0	0	0	0	0	0	1	0	2
38.5833	0	0	0	0	0	0	0	0	0	0	1	1	1
38.6079	0	0	0	0	0	0	0	0	0	0	4	3	2
38.6325	0	0	0	0	0	0	0	0	0	0	0	0	1
38.6571	0	0	0	0	1	0	0	0	0	0	1	1	2
38.6816	0	0	0	0	2	0	0	0	0	0	4	1	1
38.7062	0	0	0	0	0	1	0	0	0	0	2	0	1
38.7308	0	1	0	0	0	0	0	0	0	0	2	4	0
38.7554	0	0	0	0	0	0	0	0	0	0	1	0	2
38.78	0	0	0	0	0	0	0	0	0	0	2	2	1
38.8046	0	0	0	0	1	0	0	0	0	0	1	1	1
38.8292	0	0	0	0	0	0	0	1	0	0	4	1	1
38.8538	0	1	0	0	0	0	0	0	0	0	1	0	1
38.8784	0	0	0	0	1	0	0	0	0	0	1	4	1
38.903	0	0	0	0	0	0	0	0	0	0	1	1	3
38.9276	0	0	0	0	0	0	0	0	0	0	2	2	3
38.9521	0	0	0	0	0	0	0	0	1	0	0	2	3
38.9767	0	0	0	0	0	0	0	0	0	0	1	3	2
39.0013	0	0	0	0	0	0	0	0	0	0	1	3	1
39.0259	0	0	0	1	0	0	0	0	0	0	0	4	1
39.0505	0	0	0	0	0	0	0	0	0	0	0	1	0
39.0751	0	0	0	0	0	0	0	0	0	0	0	5	3
39.0997	0	0	0	0	0	0	0	0	0	0	0	1	2
39.1243	0	0	0	0	1	0	0	0	0	0	3	0	3
39.1489	0	0	0	0	0	0	0	0	0	0	1	1	1
39.1735	0	0	0	0	0	0	0	0	0	0	3	4	2
39.1981	0	0	0	0	0	0	0	0	0	0	0	0	3
39.2226	0	0	0	0	0	0	0	0	0	0	3	1	2
39.2472	0	0	0	0	0	0	0	0	0	0	0	0	1
39.2718	0	0	0	0	0	0	1	0	0	0	2	3	1
39.2964	0	0	0	0	0	0	0	0	0	0	2	3	2
39.321	0	1	0	0	0	0	0	0	0	1	0	3	0
39.3456	0	0	0	0	0	0	0	0	0	0	1	0	1
39.3702	0	0	0	0	0	0	0	0	0	0	0	2	1
39.3948	0	0	0	0	0	0	0	0	0	0	0	1	0
39.4194	0	0	0	0	0	0	0	0	0	0	2	0	1
39.444	0	0	0	1	0	0	0	0	0	0	1	0	1
39.4686	0	1	0	0	0	0	0	0	0	0	2	1	1
39.4931	0	0	0	0	0	0	0	0	0	0	0	2	0
39.5177	0	0	0	0	0	0	1	0	0	0	1	1	1
39.5423	0	0	0	0	0	0	0	0	0	0	0	0	0
39.5669	0	0	0	0	0	0	0	0	0	0	0	1	4
39.5915	0	0	0	0	1	0	0	0	0	0	1	3	0
39.6161	0	0	0	0	0	1	0	0	0	0	1	0	0
39.6407	0	0	0	0	0	0	0	0	0	0	1	3	0
39.6653	0	0	0	0	0	0	0	0	0	0	0	1	0
39.6899	0	0	0	0	0	0	1	0	0	1	0	0	2
39.7145	0	0	0	0	0	0	0	0	0	0	0	2	0
39.7391	0	0	0	1	0	0	0	0	0	1	0	0	1
39.7636	0	0	0	0	0	0	0	0	0	0	1	2	0
39.7882	0	0	0	0	0	0	0	0	0	0	0	1	0
39.8128	0	0	0	0	0	0	0	0	0	0	0	2	1
39.8374	0	0	0	0	0	0	0	0	0	0	3	1	2
39.862	0	0	0	0	0	0	0	0	0	0	1	2	0
39.8866	0	0	0	0	0	0	0	0	0	0	2	2	2
39.9112	0	0	0	0	0	0	0	0	0	0	2	1	1
39.9358	0	0	0	0	0	0	0	0	0	0	0	0	0
39.9604	0	0	0	0	0	0	0	0	0	0	1	2	0
39.985	0	0	0	0	0	0	0	0	0	0	0	3	1
40.0096	0	0	0	0	0	1	1	0	0	1	2	0	0
40.0341	0	0	0	0	0	0	0	0	0	0	1	1	0
40.0587	0	0	0	0	0	0	0	0	0	0	3	3	2
40.0833	0	0	0	0	0	0	0	0	0	0	1	0	2
40.1079	0	0	0	0	0	0	0	0	0	0	3	0	0
40.1325	0	1	0	0	0	0	0	0	0	0	2	2	0
40.1571	0	0	1	0	0	0	1	0	1	0	0	2	2
40.1817	0	0	0	0	0	0	0	0	0	0	2	0	0
40.2063	0	0	0	0	0	0	0	0	0	0	0	1	2
40.2309	0	0	0	0	0	0	0	0	0	0	0	2	1
40.2555	0	0	0	0	0	0	0	0	0	0	1	0	1
40.2801	0	1	0	0	0	0	0	0	0	0	1	2	0
40.3046	0	0	0	0	0	0	0	0	0	0	0	0	0
40.3292	0	0	0	0	0	0	0	0	0	0	1	2	0
40.3538	0	0	0	0	0	0	0	0	0	0	1	1	1
40.3784	0	0	0	0	0	0	0	0	0	0	2	0	1
40.403	0	0	0	0	0	0	0	0	0	0	0	0	1
40.4276	0	0	0	0	0	0	1	0	0	0	0	3	0
40.4522	0	0	0	0	0	0	0	0	0	0	1	0	1
40.4768	0	0	0	0	0	0	0	0	0	0	2	2	0
40.5014	0	0	0	0	0	0	0	0	0	0	1	3	1
40.526	0	0	0	0	0	0	0	0	0	0	0	0	2
40.5506	0	0	0	0	0	0	0	0	0	0	2	0	1
40.5752	0	0	0	0	0	0	0	0	0	0	1	1	1
40.5997	0	1	0	0	0	0	0	0	0	0	2	0	0
40.6243	0	0	0	0	0	0	0	0	0	0	2	0	1
40.6489	0	0	0	0	0	0	0	0	0	0	1	1	0
40.6735	0	0	0	0	0	0	0	0	0	0	0	3	0
40.6981	0	0	0	0	1	0	0	0	0	0	0	2	4
40.7227	0	0	0	0	0	0	0	0	0	0	1	0	0
40.7473	0	0	0	0	0	0	0	0	0	0	1	1	0
40.7719	0	0	0	0	0	0	0	0	0	0	2	2	0
40.7965	0	0	0	0	0	0	0	0	0	0	0	2	1
40.8211	0	0	0	1	0	0	0	0	0	0	1	0	0
40.8457	0	0	0	0	0	0	0	0	0	0	1	2	0
40.8702	0	0	0	0	0	0	0	0	0	0	0	0	0
40.8948	0	0	0	0	0	0	0	0	0	0	0	0	1
40.9194	0	0	0	0	0	0	0	0	0	0	2	1	0
40.944	0	0	0	0	0	0	0	0	0	0	0	0	2
40.9686	1	0	0	0	0	0	0	0	0	0	1	0	1
40.9932	0	0	0	0	0	0	0	0	0	0	1	0	1
41.0178	0	0	0	0	0	0	0	0	0	0	0	1	0
41.0424	0	0	0	0	0	0	0	0	0	0	0	1	0
41.067	0	0	0	0	0	0	0	0	0	0	0	0	3
41.0916	0	0	0	0	0	0	0	0	0	0	2	1	0
41.1162	0	0	0	0	0	0	0	0	0	0	2	1	2
41.1407	0	0	0	0	0	0	0	0	0	0	1	0	0
41.1653	0	0	1	0	0	0	0	0	0	0	1	0	1
41.1899	0	0	0	0	0	0	0	0	0	0	0	0	0
41.2145	0	0	0	0	0	0	0	0	0	0	0	1	0
41.2391	0	0	0	0	0	0	0	0	0	0	1	2	1
41.2637	0	0	0	0	0	0	0	0	0	0	0	2	1
41.2883	0	0	0	0	0	0	0	0	0	0	0	0	0
41.3129	0	0	0	0	0	1	0	0	0	0	0	4	0
41.3375	0	0	0	0	0	0	0	0	0	0	0	0	1
41.3621	0	0	0	0	0	0	0	0	0	0	0	1	0
41.3867	0	0	0	0	0	0	0	0	0	0	0	1	0
41.4112	0	0	0	0	0	0	0	0	0	0	0	1	0
41.4358	0	0	0	0	0	0	0	0	0	0	0	1	1
41.4604	0	0	0	0	0	0	0	0	0	0	0	0	1
41.485	0	0	0	0	0	0	1	0	0	0	0	1	0
41.5096	0	0	0	0	0	0	0	0	0	0	0	0	0
41.5342	0	0	0	0	0	0	0	0	0	1	1	0	0
41.5588	0	0	0	0	0	0	0	0	0	0	0	0	0
41.5834	0	0	0	0	0	0	0	0	0	0	0	1	1
41.608	0	0	0	0	0	0	0	0	0	0	0	0	0
41.6326	0	0	0	0	0	0	0	0	0	0	1	4	0
41.6572	0	0	0	0	0	0	1	0	0	0	1	1	2
41.6817	0	0	0	0	0	0	0	0	0	0	0	2	0
41.7063	0	0	0	0	0	0	0	0	0	0	0	0	0
41.7309	0	0	0	0	0	0	0	0	0	0	2	1	0
41.7555	0	0	0	0	0	0	0	0	0	0	3	1	0
41.7801	0	0	0	0	0	0	0	0	0	0	1	0	1
41.8047	0	0	0	0	0	0	0	0	0	0	0	1	1
41.8293	0	0	0	0	0	0	0	0	0	0	0	0	1
41.8539	0	0	0	0	0	0	0	0	0	0	1	1	0
41.8785	0	0	0	0	0	0	0	0	0	0	1	1	0
41.9031	0	0	0	0	0	0	0	0	0	0	1	0	0
41.9277	0	0	0	0	0	0	0	0	0	0	0	0	2
41.9522	0	0	1	0	0	0	0	0	0	0	0	1	0
41.9768	0	0	0	0	0	0	0	0	0	0	2	0	0
42.0014	0	0	0	0	0	0	1	0	0	0	1	1	1
42.026	0	0	0	0	0	1	0	0	0	0	0	2	0
42.0506	0	0	0	0	0	0	0	0	0	0	0	1	0
42.0752	0	0	0	0	0	0	0	0	0	0	0	2	2
42.0998	0	0	0	0	0	0	0	0	0	0	2	0	1
42.1244	0	0	0	0	0	0	0	0	0	0	1	1	0
42.149	0	0	0	0	0	0	0	0	0	0	0	1	0
42.1736	0	0	0	0	0	0	0	0	0	0	0	0	0
42.1982	0	0	0	0	0	0	1	0	0	0	0	0	0
42.2227	0	0	0	0	0	0	0	0	0	0	0	0	1
42.2473	0	0	0	0	0	0	0	0	0	0	1	0	0
42.2719	0	0	0	0	0	0	0	0	0	0	0	1	1
42.2965	0	0	0	0	0	0	0	0	0	0	0	0	0
42.3211	0	0	0	0	0	0	0	0	0	0	0	1	0
42.3457	0	0	0	0	0	0	0	0	0	0	0	0	2
42.3703	0	0	0	0	0	0	0	0	0	0	0	1	0
42.3949	0	0	0	0	0	0	0	0	0	0	0	0	1
42.4195	0	0	0	0	0	0	0	0	0	0	0	0	0
42.4441	0	0	0	0	0	0	0	0	0	0	0	1	0
42.4687	0	0	0	0	0	0	0	0	0	0	0	0	0
42.4932	0	1	0	0	0	0	0	0	0	0	1	0	0
42.5178	0	0	0	0	0	0	0	0	0	0	0	1	1
42.5424	0	0	0	0	0	0	0	0	0	0	0	0	0
42.567	0	0	0	0	0	0	0	0	0	0	1	0	1
42.5916	0	0	0	0	0	0	0	0	0	0	1	0	0
42.6162	0	0	0	0	0	0	0	0	0	0	0	0	1
42.6408	0	1	0	0	0	0	0	0	0	0	0	1	0
42.6654	0	0	0	0	1	0	0	0	0	0	3	2	1
42.69	0	0	0	0	0	0	0	0	0	0	1	1	1
42.7146	0	0	0	0	0	0	0	0	0	0	2	0	0
42.7392	0	0	0	0	0	0	0	0	0	0	1	0	0
42.7637	0	0	0	0	0	0	0	0	0	0	1	1	0
42.7883	0	0	0	0	0	0	0	0	0	0	0	0	0
42.8129	0	0	0	0	0	0	0	0	0	0	2	1	1
42.8375	0	0	0	0	0	0	0	0	0	0	0	0	0
42.8621	0	0	0	0	1	0	0	0	0	0	0	1	0
42.8867	0	0	0	0	0	0	0	0	0	0	1	0	1
42.9113	0	0	0	0	0	0	0	0	0	1	0	0	1
42.9359	0	0	0	0	0	0	0	0	0	1	0	1	1
42.9605	0	0	0	0	0	0	0	0	0	0	0	1	1
42.9851	0	0	0	0	0	0	0	0	0	0	3	0	0
43.0097	0	0	0	0	0	0	0	0	0	0	1	1	0
43.0343	0	0	0	0	0	0	0	0	0	0	0	0	0
43.0588	0	0	0	0	0	0	0	0	0	0	1	1	0
43.0834	0	0	0	0	0	0	0	0	0	0	2	1	0
43.108	0	0	0	0	0	0	0	0	0	0	0	1	0
43.1326	0	0	0	0	0	0	0	0	0	0	0	0	0
43.1572	0	0	0	0	0	0	0	0	0	0	0	0	0
43.1818	0	0	0	0	0	0	0	0	0	0	2	0	0
43.2064	0	0	0	0	0	0	0	0	0	0	1	0	0
43.231	0	0	0	0	0	0	0	0	0	0	1	0	0
43.2556	0	0	0	0	0	0	0	0	0	0	0	0	1
43.2802	0	0	0	0	0	0	0	0	0	0	1	0	0
43.3048	0	0	0	0	0	0	0	0	0	0	0	1	0
43.3293	0	0	0	0	0	0	0	0	0	0	0	0	0
43.3539	0	0	0	0	0	0	0	0	0	0	2	0	0
43.3785	0	0	0	0	0	0	0	0	0	0	1	0	0
43.4031	0	0	0	0	0	0	0	0	0	0	0	1	1
43.4277	0	0	0	0	0	0	0	0	1	0	0	0	1
43.4523	0	0	0	0	0	0	0	0	0	0	3	0	0
43.4769	0	0	0	0	0	0	0	0	0	0	0	0	0
43.5015	0	0	0	0	0	0	0	0	0	0	0	0	1
43.5261	0	0	0	0	0	0	0	0	0	0	1	1	1
43.5507	0	0	0	0	0	0	0	0	0	0	1	1	0
43.5753	0	0	0	0	0	0	0	0	0	0	0	0	0
43.5998	0	0	0	0	0	0	0	0	0	0	0	0	0
43.6244	0	0	0	0	0	0	0	0	0	0	0	0	1
43.649	0	0	0	0	0	0	0	0	0	0	1	1	3
43.6736	1	0	0	0	0	0	0	0	0	0	0	0	1
43.6982	0	0	0	0	0	0	0	0	0	0	0	0	0
43.7228	0	0	0	0	0	0	0	0	0	0	0	0	0
43.7474	0	0	0	0	0	0	0	0	0	0	0	0	1
43.772	0	0	0	0	0	0	0	0	0	0	1	1	0
43.7966	0	0	0	0	0	0	0	0	0	0	0	0	0
43.8212	0	0	0	0	0	0	0	0	0	0	1	1	0
43.8458	0	0	0	0	0	0	0	0	0	0	0	0	0
43.8703	0	0	0	0	0	0	0	0	0	0	1	1	1
43.8949	0	0	0	0	0	0	0	0	0	0	0	1	0
43.9195	0	0	0	0	0	0	0	0	0	0	0	0	0
43.9441	0	0	0	0	0	0	0	0	0	0	0	0	0
43.9687	0	0	0	0	0	0	0	0	0	0	1	1	0
43.9933	0	0	0	0	0	0	0	0	1	0	0	0	1
44.0179	0	0	0	0	0	0	0	0	0	0	0	0	0
44.0425	0	0	0	0	0	0	0	0	0	0	0	0	0
44.0671	0	0	0	0	0	0	0	0	0	0	0	0	0
44.0917	0	0	0	0	0	0	0	0	0	0	0	0	0
44.1163	0	0	0	0	0	0	0	0	0	0	0	1	0
44.1408	0	0	0	1	0	0	0	0	0	0	0	0	0
44.1654	0	0	0	0	0	0	0	0	0	0	0	1	0
44.19	0	0	0	0	0	0	0	0	0	0	0	0	0
44.2146	0	0	0	0	0	0	0	0	1	0	0	0	0
44.2392	0	0	0	0	0	0	0	0	0	0	0	0	0
44.2638	0	0	0	0	0	0	0	0	0	0	0	0	0
44.2884	0	0	0	0	0	0	0	0	0	0	0	0	1
44.313	0	0	0	1	0	0	0	0	0	0	0	0	0
44.3376	0	0	0	0	0	0	0	0	0	0	0	0	0
44.3622	0	0	0	0	0	0	0	0	0	0	0	1	0
44.3868	0	0	0	0	0	0	0	0	0	0	1	0	0
44.4113	0	0	0	0	0	0	0	0	0	0	0	0	0
44.4359	0	0	0	0	0	0	0	0	0	0	0	1	0
44.4605	0	0	0	0	0	0	0	0	0	0	0	0	0
44.4851	0	0	0	0	0	0	0	0	0	0	0	0	0
44.5097	0	0	0	0	0	0	0	0	0	0	0	1	0
44.5343	0	0	0	0	0	0	0	0	0	0	0	0	0
44.5589	0	0	0	0	0	0	0	0	0	0	0	0	0
44.5835	0	0	0	0	0	0	0	0	0	0	0	0	0
44.6081	0	0	0	0	0	0	0	0	0	0	0	0	0
44.6327	0	0	0	0	0	0	0	0	0	0	0	0	0
44.6573	0	0	0	0	0	0	0	0	0	1	0	0	0
44.6818	0	0	0	0	0	0	0	0	0	0	0	0	1
44.7064	0	0	0	0	0	0	0	0	0	0	0	0	0
44.731	0	0	0	0	0	0	0	0	0	0	0	1	0
44.7556	0	0	0	0	0	0	0	0	0	0	0	1	1
44.7802	0	0	0	0	0	0	0	0	0	0	0	0	0
44.8048	0	0	0	0	0	0	0	0	0	0	0	0	0
44.8294	0	0	0	0	0	0	0	0	0	0	0	0	0
44.854	0	0	0	0	0	0	0	0	0	0	0	0	1
44.8786	0	0	0	0	0	0	0	0	0	0	0	0	0
44.9032	0	0	0	0	0	1	0	0	0	0	1	0	0
44.9278	0	0	0	0	0	0	0	0	0	0	0	0	0
44.9523	0	0	0	0	0	0	0	0	0	0	0	0	1
44.9769	0	0	0	0	0	0	0	0	0	0	0	1	0
45.0015	0	0	0	0	0	0	0	0	0	0	0	0	0
45.0261	0	0	0	0	0	0	0	0	1	0	0	0	0
45.0507	0	0	0	0	0	0	0	0	0	0	0	1	0
45.0753	0	0	0	0	0	0	0	0	0	0	0	1	0
45.0999	0	0	0	0	0	0	0	0	0	0	0	0	0
45.1245	0	0	0	0	0	0	0	0	0	0	0	0	0
45.1491	0	0	0	0	0	0	0	0	0	0	0	0	0
45.1737	0	0	0	0	0	0	0	0	0	0	1	0	0
45.1983	0	0	0	0	0	0	0	0	0	0	0	1	0
45.2228	0	0	0	0	0	0	0	0	0	0	1	0	0
45.2474	0	0	0	0	0	1	0	0	0	0	0	1	0
45.272	0	0	0	0	0	0	0	0	0	0	0	1	0
45.2966	0	0	0	0	0	0	0	0	0	0	1	0	0
45.3212	0	0	0	0	0	0	0	0	0	0	0	0	0
45.3458	0	0	0	0	0	0	0	0	0	0	0	0	0
45.3704	0	0	0	0	0	0	0	0	0	0	1	1	0
45.395	0	0	0	0	0	1	0	0	0	0	0	0	0
45.4196	0	0	0	0	0	0	0	0	0	0	0	0	0
45.4442	0	0	0	0	0	0	0	0	0	0	0	0	0
45.4688	0	0	0	0	0	0	0	0	0	0	0	0	0
45.4933	0	0	0	0	0	0	0	0	0	0	1	0	1
45.5179	0	0	0	0	0	0	0	0	0	0	0	0	0
45.5425	0	0	0	0	0	0	0	0	0	0	0	0	1
45.5671	0	0	0	0	0	0	0	0	0	0	0	0	0
45.5917	0	0	0	0	0	0	0	0	0	0	0	1	1
45.6163	0	0	0	0	0	0	0	0	0	0	0	0	0
45.6409	0	0	0	0	0	0	0	0	0	0	0	0	0
45.6655	0	0	0	0	0	0	0	0	0	0	1	1	1
45.6901	0	0	0	0	0	0	0	0	0	0	0	2	0
45.7147	0	0	0	0	0	0	0	0	0	0	0	0	0
45.7393	0	0	0	0	0	0	0	0	0	0	0	1	0
45.7639	0	0	0	0	0	0	0	0	0	0	1	0	0
45.7884	0	0	0	0	0	0	0	0	0	0	0	0	0
45.813	0	0	0	0	0	0	0	0	0	0	3	0	0
45.8376	0	0	0	0	0	0	0	0	0	0	0	0	0
45.8622	0	0	0	0	0	0	0	0	0	0	1	0	0
45.8868	0	0	0	0	0	0	0	0	0	0	1	0	0
45.9114	0	0	0	0	0	0	0	0	0	0	0	0	0
45.936	0	0	0	0	0	0	0	0	0	0	0	0	1
45.9606	0	0	0	0	0	0	0	0	0	0	0	0	0
45.9852	0	0	0	0	0	0	0	0	0	0	0	1	0
46.0098	0	0	0	0	0	0	0	0	0	0	0	0	0
46.0344	0	0	0	0	0	0	0	0	0	0	1	0	0
46.0589	0	0	0	0	0	0	0	0	0	0	0	1	0
46.0835	0	0	0	0	0	0	0	0	0	0	0	1	0
46.1081	0	0	0	0	0	0	0	0	0	0	0	0	0
46.1327	0	0	0	0	0	0	0	0	0	0	0	0	0
46.1573	0	0	0	0	0	0	0	0	0	0	0	0	0
46.1819	0	0	0	0	0	0	0	0	0	0	0	0	1
46.2065	0	0	0	0	0	0	0	0	0	0	2	0	0
46.2311	0	0	0	0	0	0	0	0	0	0	0	0	0
46.2557	0	0	0	0	0	0	0	0	0	0	0	0	0
46.2803	0	0	0	1	0	0	0	0	0	0	1	0	0
46.3049	0	0	0	0	0	0	0	0	0	0	0	0	0
46.3294	0	0	0	0	0	0	0	0	0	0	1	0	0
46.354	0	0	0	0	0	0	0	0	0	0	2	0	0
46.3786	0	0	0	0	0	0	0	0	0	0	0	1	1
46.4032	0	0	0	0	0	0	0	0	0	0	0	0	1
46.4278	0	0	0	0	0	0	0	0	0	0	0	0	0
46.4524	0	0	0	0	0	0	0	0	0	0	0	0	0
46.477	0	0	0	0	0	0	0	0	0	0	0	1	1
46.5016	0	0	0	0	1	0	0	0	0	0	0	0	0
46.5262	0	0	0	0	0	0	0	0	0	0	0	0	0
46.5508	0	0	0	0	1	0	0	0	0	0	1	0	0
46.5754	0	0	0	0	0	0	0	0	0	0	0	0	0
46.5999	0	0	0	0	0	0	0	0	0	0	0	0	0
46.6245	0	0	0	0	0	0	0	0	0	0	0	1	0
46.6491	0	0	0	0	0	0	0	0	0	0	1	1	0
46.6737	0	0	0	0	0	0	0	0	0	0	0	0	0
46.6983	0	0	0	0	0	0	0	0	0	0	0	0	0
46.7229	0	0	0	0	0	0	0	0	0	0	0	0	0
46.7475	0	0	0	0	0	0	0	0	0	0	0	0	0
46.7721	0	0	0	0	0	0	0	0	0	0	0	1	0
46.7967	0	0	0	0	0	0	0	0	0	0	0	1	0
46.8213	0	0	0	0	0	0	0	0	0	0	1	0	1
46.8459	0	0	0	0	0	0	0	0	0	0	0	0	0
46.8704	0	0	0	0	0	0	0	0	0	0	0	0	0
46.895	0	0	0	0	0	0	0	0	0	0	0	0	0
46.9196	0	0	0	0	0	0	0	0	0	0	0	0	1
46.9442	0	0	0	0	0	0	0	0	0	0	0	0	0
46.9688	0	0	0	0	0	0	0	0	0	0	0	0	0
46.9934	0	0	0	0	0	0	0	0	0	0	0	1	0
47.018	0	0	0	0	0	0	0	0	0	0	1	0	0
47.0426	0	0	0	0	0	0	0	0	0	0	0	0	0
47.0672	0	0	0	0	0	0	0	0	0	0	0	1	0
47.0918	0	0	0	0	0	0	0	0	0	0	0	0	0
47.1164	0	0	0	0	0	0	0	0	0	0	2	0	0
47.1409	0	0	0	0	0	0	0	0	0	0	0	0	0
47.1655	0	0	0	0	0	0	0	0	0	0	0	1	0
47.1901	0	0	0	0	0	0	0	0	0	0	0	1	0
47.2147	0	0	0	0	0	0	0	0	0	0	0	0	1
47.2393	0	0	0	0	0	0	0	0	0	0	0	0	0
47.2639	0	0	0	0	0	0	0	0	0	0	0	0	0
47.2885	0	0	0	0	0	0	0	0	0	0	0	0	0
47.3131	0	0	0	0	0	0	0	0	0	0	1	0	0
47.3377	0	0	0	0	0	0	0	0	0	0	0	0	0
47.3623	0	0	0	0	0	0	0	0	0	0	0	0	0
47.3869	0	0	0	0	0	0	0	0	0	0	0	0	0
47.4114	0	0	0	0	0	0	0	0	0	0	0	0	0
47.436	0	0	0	0	0	0	0	0	0	0	0	0	0
47.4606	0	0	0	0	0	0	0	0	0	0	0	0	0
47.4852	0	0	0	0	0	0	0	0	0	0	0	0	0
47.5098	0	0	0	0	0	0	0	0	0	0	0	0	0
47.5344	0	0	0	0	0	0	0	0	0	0	1	0	0
47.559	0	0	0	0	0	0	0	0	0	0	0	1	0
47.5836	0	0	0	0	0	0	0	0	0	0	0	1	0
47.6082	0	0	0	0	0	0	0	0	0	0	0	1	1
47.6328	0	0	0	0	0	0	0	0	0	0	0	0	0
47.6574	0	0	0	0	0	0	0	0	0	0	0	0	0
47.6819	0	0	0	0	0	0	0	0	0	0	0	0	0
47.7065	0	1	0	0	0	0	0	0	0	0	0	1	0
47.7311	0	0	0	0	0	0	0	0	0	0	0	0	0
47.7557	0	0	0	0	0	0	0	0	0	0	1	1	0
47.7803	0	0	0	0	0	0	0	0	0	0	0	0	0
47.8049	0	0	0	0	0	0	0	0	0	0	0	0	1
47.8295	0	0	0	0	0	0	0	0	0	0	0	1	0
47.8541	0	0	0	0	0	0	0	0	0	0	0	0	0
47.8787	0	0	0	0	0	0	0	0	0	0	0	1	0
47.9033	0	0	0	0	0	0	0	0	0	0	0	0	0
47.9279	0	0	0	0	0	0	0	0	0	0	1	0	0
47.9524	0	0	0	0	0	0	0	0	0	0	0	2	0
47.977	0	0	0	0	0	0	0	0	0	0	0	0	1
48.0016	0	0	0	0	0	0	0	0	0	0	1	0	0
48.0262	0	0	0	0	0	0	0	0	0	0	0	1	0
48.0508	0	0	0	0	0	0	0	0	0	0	0	1	0
48.0754	0	0	0	0	0	0	0	0	0	0	0	0	0
48.1	0	0	0	0	0	0	0	0	0	0	1	0	0
48.1246	0	0	0	0	0	0	0	0	0	0	1	0	0
48.1492	0	0	0	0	0	0	0	0	0	0	0	0	1
48.1738	0	0	0	0	0	0	0	0	0	0	1	0	1
48.1984	0	0	0	0	0	0	0	0	0	0	0	1	0
48.223	0	0	0	0	0	0	0	0	0	0	0	0	0
48.2475	0	0	0	0	0	0	0	0	0	0	0	0	0
48.2721	0	0	0	0	0	0	0	0	0	0	0	0	2
48.2967	0	0	0	0	0	0	0	0	0	0	0	1	1
48.3213	0	0	0	0	0	0	0	0	0	0	0	0	0
48.3459	0	0	0	0	0	0	0	0	0	0	0	0	0
48.3705	0	0	0	0	0	0	0	0	0	0	0	1	0
48.3951	1	0	0	0	0	0	0	0	0	0	0	0	0
48.4197	0	0	0	0	0	0	0	0	0	0	0	0	1
48.4443	0	0	0	0	0	0	0	0	0	0	1	0	0
48.4689	0	0	0	0	0	0	0	0	0	0	0	0	0
48.4935	0	0	0	0	0	0	0	0	0	0	0	1	1
48.518	0	0	0	0	0	0	0	0	0	0	0	0	1
48.5426	0	0	0	0	0	0	0	0	0	0	0	0	0
48.5672	0	0	0	0	0	0	0	0	0	0	0	0	0
48.5918	0	0	0	0	0	0	0	0	0	0	0	0	0
48.6164	0	0	0	0	0	0	0	0	0	0	0	1	0
48.641	0	0	0	0	0	0	0	0	0	0	0	0	0
48.6656	0	0	0	0	0	0	0	0	0	0	0	0	0
48.6902	0	0	0	0	0	0	0	0	0	0	0	0	0
48.7148	0	1	0	0	0	0	0	0	0	0	0	0	0
48.7394	0	0	0	0	0	0	0	0	0	0	0	0	0
48.764	0	0	0	0	0	0	0	0	0	0	0	0	1
48.7885	0	0	0	0	0	0	0	0	0	0	1	1	1
48.8131	0	0	0	0	0	0	0	0	0	0	0	0	0
48.8377	0	0	0	0	0	0	0	0	0	0	1	0	0
48.8623	0	0	0	0	0	0	0	0	0	0	0	0	0
48.8869	0	0	0	0	0	0	0	0	0	0	0	0	0
48.9115	0	0	0	0	0	0	0	0	0	0	0	0	0
48.9361	0	0	0	0	0	0	0	0	0	0	0	0	0
48.9607	0	0	0	0	0	0	0	0	0	0	0	0	0
48.9853	0	0	0	0	0	0	0	0	0	0	0	0	0
49.0099	0	0	0	0	0	0	0	0	0	0	0	0	2
49.0345	0	0	0	0	0	0	0	0	0	0	0	1	0
49.059	0	0	0	0	0	0	0	0	0	0	0	1	0
49.0836	0	0	0	0	0	0	0	0	0	0	0	1	0
49.1082	0	0	0	0	0	0	0	0	0	0	0	0	1
[truncated: 50 more rows]

## Sheet: LBOL Data
Photon energy (keV)	Number of counts	Number of counts	Number of counts	Number of counts	Number of counts	Number of counts	Number of counts	Number of counts	Number of counts	Number of counts	Number of counts	Number of counts	Number of counts
File name	Lamb_bone_leather_1_15mm_50kV_1mA_10s_0.0mm1	Lamb_bone_leather_1_15mm_50kV_1mA_10s_0.5mm1	Lamb_bone_leather_1_15mm_50kV_1mA_10s_1.0mm1	Lamb_bone_leather_1_15mm_50kV_1mA_10s_1.5mm1	Lamb_bone_leather_1_15mm_50kV_1mA_10s_2.0mm1	Lamb_bone_leather_1_15mm_50kV_1mA_10s_2.5mm1	Lamb_bone_leather_1_15mm_50kV_1mA_10s_3.0mm1	Lamb_bone_leather_1_15mm_50kV_1mA_10s_3.5mm1	Lamb_bone_leather_1_15mm_50kV_1mA_10s_4.0mm1	Lamb_bone_leather_1_15mm_50kV_1mA_10s_4.5mm1	Lamb_bone_leather_1_15mm_50kV_1mA_300s_1.7mm1	Lamb_bone_leather_1_15mm_50kV_1mA_300s_1.7mm2	Lamb_bone_leather_1_15mm_50kV_1mA_300s_1.7mm3
0	0	0	0	0	0	0	0	0	0	0	0	0	0
0.024591	0	0	0	0	0	0	0	0	0	0	0	0	0
0.049182	0	0	0	0	0	0	0	0	0	0	0	0	0
0.073773	0	0	0	0	0	0	0	0	0	0	0	0	0
0.098364	0	0	0	0	0	0	0	0	0	0	0	0	0
0.122955	0	0	0	0	0	0	0	0	0	0	0	0	0
0.147546	0	0	0	0	0	0	0	0	0	0	0	0	0
0.172137	0	0	0	0	0	0	0	0	0	0	0	0	0
0.196728	0	0	0	0	0	0	0	0	0	0	0	0	0
0.221319	0	0	0	0	0	0	0	0	0	0	0	0	0
0.24591	0	0	0	0	0	0	0	0	0	0	0	0	0
0.270501	0	0	0	0	0	0	0	0	0	0	0	0	0
0.295092	0	0	0	0	0	0	0	0	0	0	0	0	0
0.319683	0	0	0	0	0	0	0	0	0	0	0	0	0
0.344274	0	0	0	0	0	0	0	0	0	0	0	0	0
0.368865	0	0	0	0	0	0	0	0	0	0	0	0	0
0.393456	0	0	0	0	0	0	0	0	0	0	0	0	0
0.418047	0	0	0	0	0	0	0	0	0	0	0	0	0
0.442638	0	0	0	0	0	0	0	0	0	0	0	0	0
0.467229	0	0	0	0	0	0	0	0	0	0	0	0	0
0.49182	1	1	2	1	2	0	0	0	0	0	26	29	36
0.516411	2	3	3	1	2	0	0	0	0	2	38	46	46
0.541002	1	3	2	2	0	1	1	2	0	1	54	40	46
0.565593	6	2	1	3	0	1	2	1	2	1	57	39	45
0.590184	0	0	1	5	0	0	2	0	0	0	51	46	35
0.614775	1	3	2	1	1	3	1	0	0	1	40	47	40
0.639366	1	4	1	5	1	1	0	2	0	1	40	46	36
0.663957	0	2	3	2	1	0	0	1	0	3	44	48	33
0.688548	3	0	1	3	2	1	0	1	0	1	37	40	42
0.713139	1	3	3	2	2	6	2	0	2	0	32	32	41
0.73773	2	4	1	0	0	3	1	0	0	3	33	43	34
0.762321	1	0	0	2	4	1	2	2	0	1	43	39	42
0.786912	0	2	2	1	3	1	0	1	2	1	35	45	28
0.811503	3	2	1	4	0	1	0	1	2	1	33	35	40
0.836094	1	2	1	0	1	0	1	1	0	1	38	45	37
0.860685	1	1	5	3	1	1	1	0	1	1	44	36	30
0.885276	1	2	3	3	2	1	0	3	1	1	46	48	43
0.909867	0	1	1	2	3	1	1	1	0	0	35	29	35
0.934458	1	1	1	2	3	2	2	0	1	0	47	37	42
0.959049	0	1	2	0	2	1	0	1	1	0	27	40	38
0.98364	1	0	2	2	2	2	1	1	2	0	41	40	46
1.00823	2	1	1	1	1	4	0	2	0	0	46	34	37
1.03282	3	0	2	2	3	0	2	0	2	0	39	33	46
1.05741	0	2	2	0	0	0	0	2	2	0	28	44	30
1.082	0	0	0	0	2	2	2	1	1	0	34	41	31
1.10659	0	1	3	1	0	0	1	2	2	2	34	39	37
1.13119	1	2	0	3	0	1	1	2	1	0	40	27	32
1.15578	1	2	0	0	0	0	1	0	0	0	36	36	36
1.18037	1	2	2	1	0	0	2	0	1	1	33	33	42
1.20496	2	0	0	2	3	0	2	0	1	0	36	34	36
1.22955	0	1	0	1	0	0	0	0	2	0	38	31	26
1.25414	0	0	1	2	1	1	1	0	2	3	29	30	23
1.27873	2	0	0	2	1	1	0	0	1	0	34	37	25
1.30332	1	2	1	0	0	1	0	3	1	1	35	38	28
1.32791	1	1	0	2	3	2	1	0	0	0	33	29	39
1.35251	0	0	5	2	1	0	0	2	0	1	30	34	40
1.3771	3	2	0	1	0	0	0	1	0	0	40	36	29
1.40169	2	0	0	1	2	0	2	1	0	1	34	29	43
1.42628	2	0	0	1	0	2	0	0	0	2	33	22	34
1.45087	1	1	1	0	1	0	0	1	0	0	22	35	34
1.47546	1	2	0	1	2	0	0	0	0	0	27	29	35
1.50005	3	1	0	2	2	0	2	0	1	2	34	42	28
1.52464	4	1	3	2	0	1	1	0	0	0	32	34	26
1.54923	2	0	2	0	1	1	1	1	1	0	30	25	18
1.57382	0	2	0	2	1	0	2	0	1	0	27	25	32
1.59841	0	0	2	1	0	2	1	0	1	0	25	28	31
1.62301	1	1	4	1	0	0	2	2	1	0	26	18	20
1.6476	1	1	0	1	1	1	1	0	1	1	28	26	22
1.67219	0	0	1	0	1	0	0	1	1	0	28	25	24
1.69678	0	2	0	0	0	0	1	1	0	0	26	31	18
1.72137	1	1	1	2	0	2	0	0	0	1	30	29	31
1.74596	0	1	1	2	1	1	1	0	1	0	28	24	22
1.77055	0	1	1	1	1	1	0	0	1	1	22	16	29
1.79514	1	1	0	0	0	0	0	0	0	0	27	16	18
1.81973	1	2	1	0	3	0	0	1	2	0	19	29	24
1.84432	0	2	0	1	0	2	0	1	0	0	22	16	17
1.86892	1	1	0	1	2	2	0	0	1	2	28	28	27
1.89351	2	0	1	0	1	2	0	0	0	1	18	18	20
1.9181	2	0	2	0	1	0	0	3	1	1	18	26	27
1.94269	2	0	0	1	1	1	0	0	1	0	16	29	32
1.96728	0	0	1	2	0	1	0	2	0	0	23	23	19
1.99187	1	2	2	0	2	3	0	0	1	0	23	12	24
2.01646	0	1	1	1	0	1	0	0	0	0	15	22	30
2.04105	2	0	0	1	0	2	0	1	0	0	17	21	17
2.06564	1	1	1	0	3	3	0	1	0	1	19	14	14
2.09023	1	2	0	3	1	1	1	0	0	0	21	22	25
2.11483	1	0	0	1	0	1	1	1	0	1	16	22	21
2.13942	0	3	1	1	0	1	0	0	0	0	20	16	20
2.16401	2	0	0	0	1	1	0	1	1	0	24	18	13
2.1886	0	3	0	0	0	0	0	0	0	0	24	29	21
2.21319	1	1	0	0	0	2	2	1	1	0	19	12	13
2.23778	1	1	0	1	0	0	0	1	0	1	32	23	19
2.26237	1	0	0	0	1	0	1	3	0	0	25	18	20
2.28696	1	2	1	0	1	1	0	0	1	1	25	26	19
2.31155	1	4	1	0	1	1	2	3	0	1	25	19	22
2.33615	2	1	0	0	1	0	1	0	0	1	27	15	20
2.36074	2	0	1	0	0	0	0	0	0	0	15	15	19
2.38533	0	0	0	1	0	0	0	2	1	0	13	16	15
2.40992	1	1	1	0	0	0	1	0	0	0	18	16	14
2.43451	1	0	1	0	0	0	2	0	0	0	12	11	20
2.4591	1	0	1	0	1	0	0	1	0	1	16	21	21
2.48369	0	1	0	2	1	1	0	1	0	0	12	12	14
2.50828	1	0	0	1	0	0	0	1	0	0	16	14	12
2.53287	2	0	0	1	0	0	0	0	0	0	17	20	15
2.55746	1	1	1	0	1	1	0	0	0	0	15	15	17
2.58205	1	3	3	0	0	1	0	0	0	0	18	17	10
2.60665	0	0	0	2	0	0	2	0	0	1	19	12	15
2.63124	0	0	0	0	1	1	1	0	0	0	14	15	10
2.65583	0	1	0	1	0	1	0	0	0	0	16	8	13
2.68042	0	0	1	0	0	1	1	0	0	0	12	15	16
2.70501	1	0	1	1	0	0	0	0	1	1	10	10	5
2.7296	1	0	0	0	0	0	1	0	0	0	13	16	11
2.75419	0	2	0	0	0	0	0	1	1	0	13	9	7
2.77878	1	0	0	2	2	0	2	0	0	0	10	14	9
2.80337	0	0	0	0	1	0	0	0	0	0	16	11	15
2.82796	1	0	0	0	1	0	0	0	1	0	7	9	8
2.85256	0	0	0	0	1	0	0	0	0	0	8	7	7
2.87715	0	0	0	1	0	0	0	0	0	0	11	14	7
2.90174	0	0	0	0	0	1	0	0	0	1	13	15	10
2.92633	0	1	0	0	0	0	0	0	0	0	10	11	13
2.95092	2	1	1	1	0	0	1	0	0	0	11	11	12
2.97551	0	0	0	0	0	1	0	1	0	1	9	21	12
3.0001	0	0	0	0	0	0	0	0	0	0	9	16	16
3.02469	0	0	1	0	0	0	1	0	0	0	12	10	8
3.04928	0	1	1	0	0	2	0	0	1	0	12	13	13
3.07388	2	0	0	0	0	0	1	0	0	0	15	12	15
3.09847	0	0	0	0	0	3	1	0	0	0	15	11	10
3.12306	1	1	0	0	0	1	0	0	0	0	9	7	9
3.14765	1	0	0	0	0	0	0	2	0	0	12	6	10
3.17224	0	1	0	0	0	0	0	1	1	0	7	9	6
3.19683	0	0	1	0	0	0	0	0	0	0	7	11	11
3.22142	0	1	0	2	0	1	0	0	0	0	8	12	6
3.24601	0	0	0	1	0	0	0	0	1	0	8	6	7
3.2706	1	1	1	0	1	1	0	0	1	0	7	10	8
3.29519	0	1	0	0	0	0	0	0	0	1	16	8	10
3.31978	0	0	1	0	0	0	0	0	0	0	9	9	6
3.34438	0	0	0	0	0	1	0	0	2	0	14	12	8
3.36897	0	0	0	0	0	0	1	0	0	0	7	13	10
3.39356	0	0	1	1	2	0	0	0	0	0	10	9	4
3.41815	0	0	0	0	0	0	0	0	1	0	8	8	6
3.44274	0	0	0	0	0	0	0	0	0	0	12	4	7
3.46733	0	0	0	0	0	0	0	1	0	0	6	5	5
3.49192	0	0	0	0	0	0	0	0	0	0	9	13	7
3.51651	0	0	0	1	0	0	0	2	0	0	2	8	2
3.5411	0	0	0	0	0	0	0	0	0	0	9	5	8
3.56569	2	0	1	1	0	0	0	0	0	0	11	8	7
3.59029	0	1	0	1	0	1	0	0	0	0	5	2	9
3.61488	0	1	0	0	1	0	2	0	0	1	13	13	12
3.63947	2	1	0	0	0	0	0	0	0	0	22	12	19
3.66406	2	4	0	2	0	0	0	0	1	0	25	18	27
3.68865	3	0	2	0	0	0	1	0	0	1	25	28	32
3.71324	4	3	0	1	0	0	0	0	0	0	20	23	27
3.73783	0	0	1	1	1	0	0	0	0	0	20	23	21
3.76242	0	0	1	1	1	0	0	0	1	0	8	18	13
3.78701	1	2	1	0	0	0	0	0	0	0	4	3	7
3.81161	0	0	0	1	0	1	0	0	0	0	5	7	7
3.8362	1	0	0	0	0	0	0	0	0	0	5	6	4
3.86079	0	0	0	0	0	0	1	1	0	0	3	6	5
3.88538	0	1	0	0	0	0	0	0	0	0	8	5	6
3.90997	1	0	0	0	0	0	0	0	1	0	2	6	7
3.93456	0	0	0	0	0	0	0	0	0	0	9	2	6
3.95915	0	0	0	0	0	1	0	0	0	0	12	6	7
3.98374	0	0	0	0	0	0	1	0	0	0	7	12	6
4.00833	0	0	0	1	0	0	1	0	0	0	5	10	10
4.03292	2	0	0	0	1	0	0	0	0	0	5	9	6
4.05752	1	0	0	0	0	1	0	0	0	0	10	6	4
4.08211	1	0	1	0	0	0	0	0	0	0	6	4	7
4.1067	0	0	0	2	0	0	0	0	1	0	5	4	4
4.13129	0	0	1	0	0	1	0	1	0	1	7	4	4
4.15588	1	0	1	1	0	0	0	0	0	0	4	7	4
4.18047	0	0	0	1	1	0	0	0	1	0	3	5	5
4.20506	1	0	0	0	0	0	0	0	0	0	8	5	4
4.22965	0	0	0	0	0	0	0	1	0	0	4	8	10
4.25424	0	0	0	0	0	0	0	0	0	0	3	0	2
4.27883	0	0	0	0	1	0	0	0	0	0	1	3	2
4.30342	0	0	0	0	0	1	0	1	1	0	1	5	1
4.32802	0	0	0	0	0	0	0	0	0	0	5	5	2
4.35261	0	0	0	0	0	0	0	0	0	0	4	5	3
4.3772	1	0	1	0	0	0	0	0	1	0	6	4	5
4.40179	0	0	1	0	0	0	0	0	0	0	6	5	1
4.42638	0	2	0	0	1	0	0	0	0	0	5	4	4
4.45097	0	0	0	0	0	0	0	0	1	0	1	5	6
4.47556	0	1	1	0	0	0	0	0	0	0	3	2	3
4.50015	0	0	0	1	0	0	0	1	0	0	2	1	3
4.52474	0	0	0	0	0	0	1	1	0	0	5	3	4
4.54934	1	0	0	0	0	0	0	0	0	0	6	2	5
4.57393	0	0	1	0	1	1	0	0	0	0	4	6	2
4.59852	0	1	0	0	0	0	0	1	0	0	6	3	1
4.62311	0	0	0	0	1	0	0	0	0	0	3	3	4
4.6477	0	0	0	0	0	0	0	0	0	0	4	5	1
4.67229	0	0	0	0	0	0	0	1	0	0	3	2	3
4.69688	0	0	0	0	0	0	0	0	0	0	2	4	2
4.72147	1	0	0	0	0	0	0	0	0	0	6	5	6
4.74606	0	0	0	0	0	0	0	1	0	0	2	4	2
4.77065	0	1	0	0	0	0	0	1	0	1	4	10	5
4.79525	0	0	0	0	0	0	0	0	0	0	4	5	1
4.81984	0	0	0	0	0	0	0	0	0	1	3	1	5
4.84443	0	0	0	0	0	0	0	0	0	0	3	2	4
4.86902	0	0	0	0	0	0	0	0	0	0	5	4	5
4.89361	0	0	0	0	0	0	0	0	0	0	4	0	0
4.9182	0	0	0	0	0	0	0	0	0	0	1	5	4
4.94279	0	0	0	0	1	0	0	0	0	0	6	1	4
4.96738	0	0	0	0	0	0	0	0	0	0	2	4	3
4.99197	0	0	0	0	0	1	0	0	0	1	1	3	2
5.01656	0	0	0	0	0	0	0	0	0	0	3	2	3
5.04115	0	0	1	1	0	0	0	0	0	0	2	3	0
5.06575	0	0	0	0	0	0	0	0	0	0	5	2	2
5.09034	0	0	1	1	0	0	0	0	0	0	3	2	2
5.11493	0	0	0	0	1	0	0	0	0	0	2	1	5
5.13952	0	0	0	0	0	0	0	0	1	1	1	6	2
5.16411	0	0	0	0	1	0	1	0	0	0	4	4	1
5.1887	1	0	0	1	1	0	0	0	0	0	2	2	5
5.21329	0	0	0	0	0	0	0	0	0	0	1	3	6
5.23788	0	0	0	0	0	1	0	0	0	0	1	4	6
5.26247	0	0	0	0	0	0	0	0	0	0	4	0	3
5.28707	0	0	0	0	0	0	0	1	0	0	3	2	5
5.31166	0	1	0	0	0	0	0	0	0	0	1	3	2
5.33625	0	0	0	0	0	0	0	0	0	0	4	2	3
5.36084	0	0	0	0	0	0	0	0	0	0	5	4	6
5.38543	0	0	0	0	0	0	0	0	0	0	4	2	5
5.41002	0	2	0	0	0	0	0	0	0	0	6	3	4
5.43461	0	0	0	0	0	0	0	0	0	0	5	4	5
5.4592	1	0	0	0	0	0	0	0	0	0	6	6	2
5.48379	0	1	0	0	1	0	0	0	0	0	8	5	2
5.50838	0	1	0	1	0	0	0	0	0	0	2	1	5
5.53298	0	0	0	0	0	0	0	0	0	0	1	4	5
5.55757	0	0	0	0	0	0	0	0	0	0	0	4	2
5.58216	0	0	0	0	0	0	0	0	0	0	5	5	1
5.60675	0	0	0	0	0	0	0	0	0	0	4	1	6
5.63134	0	0	0	0	0	0	0	0	0	0	5	4	4
5.65593	0	0	0	1	1	0	0	0	0	0	2	2	5
5.68052	0	0	1	0	0	0	0	0	0	1	3	3	6
5.70511	0	0	0	0	0	1	0	0	0	0	1	1	4
5.7297	0	1	0	0	0	0	0	0	0	0	2	2	3
5.75429	0	0	0	0	0	0	0	0	0	0	2	4	2
5.77888	0	0	0	1	0	0	0	1	1	0	2	5	4
5.80348	0	0	0	0	0	0	0	0	0	0	4	7	2
5.82807	0	0	1	0	0	0	0	0	0	0	7	6	5
5.85266	0	1	2	0	0	0	0	0	0	0	7	12	11
5.87725	1	1	0	1	1	0	0	0	0	0	11	12	7
5.90184	3	1	0	0	0	0	0	0	0	0	14	8	9
5.92643	0	0	0	0	0	0	1	0	0	1	12	11	8
5.95102	0	1	0	0	1	1	0	0	0	0	4	5	5
5.97561	0	0	1	0	1	1	0	0	0	0	7	3	2
6.0002	0	0	1	0	0	0	0	0	0	0	1	3	6
6.0248	0	0	0	0	0	0	0	0	0	0	4	1	8
6.04939	0	0	0	0	0	0	0	0	0	0	4	0	4
6.07398	0	1	0	0	0	0	0	0	0	0	3	2	3
6.09857	0	0	0	0	0	0	0	0	0	0	0	5	3
6.12316	0	0	1	0	0	0	0	0	0	0	2	2	3
6.14775	0	0	0	0	0	0	0	0	0	0	2	4	5
6.17234	0	1	2	0	1	0	0	0	0	0	3	3	3
6.19693	0	0	0	0	0	1	0	0	0	0	4	5	2
6.22152	0	0	1	1	0	1	0	0	1	0	3	2	5
6.24611	0	0	0	0	0	0	1	0	0	0	6	2	3
6.27071	0	0	0	0	0	0	0	0	0	0	5	5	6
6.2953	1	0	0	0	1	2	0	0	0	0	3	9	6
6.31989	1	0	0	0	0	1	0	0	0	0	12	12	15
6.34448	2	1	0	0	0	0	0	0	0	0	12	12	7
6.36907	1	0	0	1	0	0	0	0	0	0	16	23	11
6.39366	1	1	3	1	1	0	1	0	0	1	9	22	22
6.41825	3	0	3	1	1	0	0	0	0	0	16	12	16
6.44284	1	0	0	1	0	0	1	0	0	0	14	12	12
6.46743	0	1	0	0	1	0	0	0	1	0	7	14	10
6.49202	0	0	0	0	0	0	0	1	0	0	9	6	7
6.51661	0	1	0	0	0	0	0	0	0	0	9	5	6
6.54121	1	0	0	0	0	0	0	0	0	0	5	3	4
6.5658	0	0	0	0	0	0	0	1	0	0	2	2	2
6.59039	0	0	0	0	0	0	0	0	0	0	3	3	0
6.61498	1	0	0	0	0	0	0	0	0	0	1	1	2
6.63957	0	0	0	0	0	0	0	0	0	0	0	0	2
6.66416	0	0	0	0	0	0	0	0	0	0	0	3	2
6.68875	0	0	0	0	0	0	0	0	0	0	0	1	2
6.71334	0	0	0	2	0	0	0	0	0	0	0	0	4
6.73793	0	0	0	0	0	0	0	0	0	0	6	0	0
6.76253	0	1	0	0	0	0	0	0	0	0	1	1	3
6.78712	0	1	0	0	0	0	0	0	0	0	1	6	1
6.81171	0	0	1	0	0	0	0	0	0	0	2	1	1
6.8363	0	0	0	0	0	0	0	0	0	0	2	1	1
6.86089	0	0	0	0	0	0	0	0	0	0	3	2	2
6.88548	0	0	0	0	0	0	0	0	0	0	2	0	1
6.91007	0	0	0	0	0	0	0	0	0	0	2	2	4
6.93466	2	0	0	0	0	0	0	0	0	0	3	1	1
6.95925	1	0	0	1	1	0	0	0	0	0	4	5	5
6.98384	0	0	0	0	0	0	0	0	0	0	5	2	1
7.00844	0	1	0	0	0	0	0	0	0	0	0	5	4
7.03303	0	0	0	0	0	0	0	0	0	0	9	7	5
7.05762	0	0	0	0	0	0	0	0	0	0	3	6	3
7.08221	0	0	0	0	0	0	0	0	0	0	2	4	3
7.1068	0	0	0	0	0	0	0	0	0	0	3	2	5
7.13139	1	0	0	0	0	0	0	1	0	0	5	2	1
7.15598	0	0	0	0	0	0	0	0	0	0	3	2	3
7.18057	0	0	0	0	0	0	0	0	0	0	2	2	4
7.20516	0	0	0	0	1	0	0	0	0	0	3	1	2
7.22975	0	0	0	0	0	1	0	0	0	0	1	2	0
7.25434	0	0	0	0	0	0	0	0	0	1	2	1	4
7.27894	0	0	0	0	0	1	0	0	0	0	0	3	1
7.30353	0	0	0	0	0	0	0	0	0	0	2	1	5
7.32812	0	0	0	1	1	0	0	0	0	0	4	6	5
7.35271	1	0	0	1	0	1	2	0	0	0	4	7	4
7.3773	0	0	0	0	0	0	0	1	1	0	12	12	16
7.40189	1	0	0	0	2	2	1	0	0	1	17	17	15
7.42648	1	1	0	1	2	0	0	0	1	0	20	19	16
7.45107	1	4	1	1	0	2	0	0	0	0	24	21	21
7.47566	0	0	2	0	1	0	0	1	0	1	31	23	15
7.50026	0	1	0	0	0	1	0	0	0	0	19	12	19
7.52485	0	0	0	0	1	1	0	0	1	1	16	20	14
7.54944	1	1	1	1	0	0	0	1	0	0	8	8	7
7.57403	0	1	1	0	1	1	0	0	0	0	4	7	5
7.59862	0	0	0	0	0	0	0	0	0	0	3	4	4
7.62321	0	1	0	0	0	0	0	0	0	0	5	3	4
7.6478	0	2	0	0	0	0	0	0	0	0	0	0	7
7.67239	0	0	0	0	0	0	0	0	0	0	1	4	5
7.69698	0	0	0	0	0	0	0	0	0	0	6	4	2
7.72157	1	0	0	0	0	0	0	0	0	0	3	3	2
7.74617	1	0	0	0	0	0	1	0	0	0	3	6	1
7.77076	0	0	0	0	0	1	0	0	0	1	3	2	1
7.79535	1	0	0	0	0	1	0	0	0	0	4	5	2
7.81994	0	0	0	0	1	0	0	1	0	0	4	3	7
7.84453	0	0	0	0	0	0	0	1	0	0	6	10	6
7.86912	1	0	1	1	1	1	0	0	1	0	14	14	7
7.89371	2	3	4	3	1	1	0	0	0	0	33	21	38
7.9183	3	2	5	0	2	1	0	0	2	2	39	45	45
7.94289	2	2	3	4	0	1	2	1	1	2	69	71	79
7.96748	7	4	0	4	3	1	2	1	1	2	132	129	144
7.99207	7	4	4	4	7	6	1	0	3	2	169	153	162
8.01667	11	7	9	6	4	4	5	2	3	2	176	168	166
8.04126	13	16	10	5	7	1	2	4	2	6	163	159	158
8.06585	11	6	3	5	2	1	5	4	1	1	136	173	141
8.09044	7	4	4	2	3	4	2	1	0	2	82	102	119
8.11503	1	3	6	2	3	4	0	0	0	1	63	50	53
8.13962	3	0	1	0	0	1	0	2	2	1	41	29	34
8.16421	0	0	1	1	0	0	0	0	0	0	18	17	20
8.1888	0	1	0	1	0	0	0	0	0	0	11	8	10
8.21339	0	1	1	0	0	0	0	0	0	0	7	10	8
8.23799	0	0	0	0	0	0	0	0	0	0	10	9	8
8.26258	1	0	1	0	0	0	0	0	0	0	8	9	9
8.28717	0	0	0	0	0	0	0	0	0	0	7	10	2
8.31176	0	1	0	0	0	0	0	0	1	0	3	1	6
8.33635	0	0	1	0	0	0	0	0	1	0	6	6	5
8.36094	0	0	0	0	0	0	0	0	0	0	0	3	3
8.38553	0	0	0	0	0	0	0	0	0	1	6	0	4
8.41012	1	0	0	0	0	0	0	0	1	0	3	3	1
8.43471	0	2	0	0	0	0	0	0	0	0	1	4	4
8.4593	2	0	0	0	0	0	1	0	0	0	2	3	3
8.4839	0	0	0	1	0	0	0	0	0	0	4	7	7
8.50849	0	0	0	0	1	0	1	0	0	0	9	13	4
8.53308	1	1	1	0	0	0	0	0	0	0	11	20	12
8.55767	2	1	1	0	2	0	1	0	0	0	11	17	14
8.58226	2	1	1	1	1	2	0	1	0	0	17	24	22
8.60685	1	1	0	0	0	0	0	0	0	1	11	21	26
8.63144	2	1	0	2	2	1	0	1	1	0	21	31	16
8.65603	2	0	0	1	1	0	1	0	1	0	27	15	16
8.68062	0	0	1	0	0	1	0	0	0	0	15	23	12
8.70521	0	0	0	1	1	0	0	0	0	0	12	3	11
8.72981	0	0	1	0	0	1	0	0	0	0	11	7	12
8.7544	0	1	1	1	0	2	0	0	0	1	10	9	9
8.77899	0	0	1	2	0	0	1	1	0	0	13	11	12
8.80358	2	0	2	1	0	0	0	0	1	1	16	10	20
8.82817	3	3	1	0	2	2	0	0	0	1	28	15	26
8.85276	4	2	2	0	1	1	3	0	2	0	24	27	34
8.87735	4	2	0	1	1	0	0	0	1	1	39	17	42
8.90194	0	0	1	0	1	0	1	1	0	1	35	29	31
8.92653	2	1	1	0	0	1	2	0	0	0	27	26	21
8.95112	2	0	1	1	1	0	1	0	0	0	14	19	21
8.97571	1	0	0	1	0	0	0	0	0	0	17	13	15
9.00031	0	0	1	0	0	0	0	0	0	0	8	9	8
9.0249	0	0	0	0	1	0	0	0	0	0	7	3	5
9.04949	0	0	0	1	0	0	0	0	0	0	3	4	3
9.07408	0	0	0	0	0	0	0	1	0	0	3	3	1
9.09867	0	0	0	0	0	0	0	0	0	0	1	6	1
9.12326	0	0	0	0	0	0	0	0	0	1	4	5	1
9.14785	0	0	1	1	1	0	0	0	0	0	1	3	5
9.17244	0	0	0	0	0	0	0	0	0	0	2	1	5
9.19703	0	0	1	0	0	0	0	0	0	0	2	5	5
9.22162	0	1	0	0	1	0	0	0	0	0	3	4	1
9.24622	0	0	0	0	0	0	1	0	0	0	3	2	1
9.27081	0	0	1	0	0	0	0	0	0	0	2	5	6
9.2954	0	0	0	0	0	0	0	0	0	0	4	3	3
9.31999	0	0	0	0	1	0	0	0	0	0	3	1	2
9.34458	0	0	0	0	0	0	0	0	0	0	2	3	5
9.36917	0	0	0	0	0	0	0	0	0	0	6	2	4
9.39376	0	0	0	0	0	1	0	0	0	0	3	6	6
9.41835	0	0	0	0	0	0	0	0	0	0	3	4	1
9.44294	0	0	0	0	0	0	0	0	0	0	2	5	4
9.46753	0	3	2	0	0	1	0	0	0	0	3	7	3
9.49213	0	0	0	1	0	0	0	0	0	0	7	8	7
9.51672	0	0	0	0	1	0	0	0	0	0	9	2	8
9.54131	1	1	0	0	0	1	0	0	0	0	5	8	12
9.5659	0	1	2	0	1	0	0	0	0	0	10	8	4
9.59049	0	0	0	1	0	0	0	0	0	0	6	11	3
9.61508	0	1	0	0	0	0	0	0	0	0	5	2	9
9.63967	1	0	0	2	0	0	0	0	0	0	7	2	5
9.66426	0	0	0	0	0	0	0	0	0	0	4	5	5
9.68885	1	0	0	0	0	0	0	0	0	0	7	4	3
9.71345	0	0	0	0	0	0	0	0	0	0	2	5	3
9.73804	0	0	1	0	0	0	0	0	0	0	4	3	1
9.76263	0	0	0	0	0	0	0	0	0	0	4	5	4
9.78722	0	0	0	1	0	0	1	0	0	0	4	2	3
9.81181	0	1	0	0	0	1	0	0	1	0	2	5	3
9.8364	0	0	0	0	0	0	0	0	0	0	3	0	1
9.86099	1	0	0	0	0	0	1	0	0	0	4	5	4
9.88558	0	0	0	0	0	0	0	0	0	0	5	0	2
9.91017	0	0	0	0	1	0	0	0	0	1	0	3	2
9.93476	0	0	0	0	0	0	0	0	0	0	4	3	5
9.95936	0	0	0	0	0	0	0	0	0	0	4	4	5
9.98395	0	0	1	0	0	0	0	0	0	0	2	2	4
10.0085	0	1	0	0	0	0	0	0	0	0	5	7	2
10.0331	0	0	0	0	0	0	0	0	0	0	3	5	2
10.0577	0	0	0	1	1	0	0	0	0	0	7	7	4
10.0823	0	0	1	0	0	0	0	0	0	0	8	4	6
10.1069	2	0	0	0	0	0	0	0	0	0	6	4	2
10.1315	0	0	0	0	0	1	1	0	0	1	3	7	12
10.1561	0	0	0	0	0	1	0	0	0	0	13	4	4
10.1807	0	0	0	0	0	0	0	0	0	0	5	3	4
10.2053	0	1	0	0	0	0	1	2	0	0	2	5	7
10.2299	1	0	0	1	0	0	0	1	0	0	9	7	3
10.2544	0	0	0	0	0	0	0	1	0	0	3	4	8
10.279	0	0	0	0	0	0	0	0	0	0	6	3	4
10.3036	1	1	0	0	0	0	0	1	0	0	2	1	3
10.3282	0	1	0	0	1	0	0	0	1	0	6	3	2
10.3528	0	0	0	0	0	0	0	0	0	0	5	3	10
10.3774	0	0	0	0	0	0	1	1	1	0	4	2	2
10.402	0	0	0	0	0	0	0	0	0	0	4	6	3
10.4266	0	0	0	0	0	0	0	0	1	0	4	6	5
10.4512	0	0	0	0	0	0	0	0	0	0	3	4	4
10.4758	1	0	1	0	0	1	0	0	0	1	5	5	2
10.5004	0	0	0	1	0	0	1	0	1	0	13	10	4
10.5249	1	0	0	1	0	0	1	0	2	0	5	12	4
10.5495	0	0	0	1	2	0	0	0	0	0	3	5	4
10.5741	0	1	0	0	0	1	1	0	0	1	9	3	3
10.5987	0	0	0	1	1	0	0	0	1	1	7	6	1
10.6233	0	0	0	0	1	0	0	0	1	0	6	5	9
10.6479	0	0	0	0	0	0	0	0	1	0	3	4	6
10.6725	0	0	0	0	0	0	0	0	0	0	6	2	4
10.6971	0	0	0	0	0	0	0	0	0	0	2	6	5
10.7217	0	1	0	0	0	0	0	0	0	0	2	9	3
10.7463	0	0	0	0	0	0	0	0	0	0	7	6	6
10.7709	0	0	0	0	1	1	0	1	0	0	6	4	7
10.7954	0	1	1	0	0	0	0	0	1	0	6	7	7
10.82	0	0	0	0	1	0	0	0	0	0	2	6	5
10.8446	0	1	1	0	0	0	0	0	0	0	5	6	3
10.8692	1	0	0	1	0	1	0	0	0	0	7	5	7
10.8938	0	1	0	0	0	0	1	0	0	0	3	7	5
10.9184	0	0	0	1	0	0	0	1	0	1	9	13	6
10.943	1	0	0	1	1	1	0	0	0	0	8	11	9
10.9676	0	1	1	0	0	0	0	0	0	0	9	9	10
10.9922	1	0	1	1	0	0	0	0	0	0	12	15	12
11.0168	0	0	1	0	0	0	0	0	0	0	11	10	10
11.0414	2	1	1	0	0	0	0	0	0	0	10	10	12
11.066	1	1	1	0	1	0	2	0	0	0	11	11	12
11.0905	1	0	1	1	0	0	0	0	0	0	7	13	15
11.1151	0	0	0	0	0	0	1	0	0	0	8	8	6
11.1397	1	0	0	0	0	0	0	0	0	0	14	16	12
11.1643	0	1	0	2	0	0	0	0	0	0	13	15	16
11.1889	0	1	1	0	0	0	0	0	2	0	14	15	7
11.2135	1	1	0	0	0	0	0	0	0	0	28	12	14
11.2381	1	0	0	0	0	2	1	0	1	0	18	20	21
11.2627	0	0	0	1	0	0	0	0	0	1	16	25	14
11.2873	1	1	2	2	1	2	0	0	0	0	26	23	20
11.3119	3	1	0	0	4	3	0	0	2	0	22	27	29
11.3365	2	4	0	1	2	0	2	1	1	0	25	26	25
11.361	2	5	2	1	1	0	2	0	0	3	23	25	41
11.3856	1	1	2	3	2	0	0	0	0	0	22	21	30
11.4102	3	2	3	1	0	1	1	0	0	1	33	51	33
11.4348	2	1	3	2	0	0	1	0	0	0	39	33	25
11.4594	4	3	0	3	2	1	0	1	2	1	31	42	33
11.484	6	1	0	0	2	0	0	1	1	2	44	31	37
11.5086	6	1	0	3	1	0	1	0	1	1	40	35	39
11.5332	3	4	1	4	1	1	2	0	1	1	34	32	31
11.5578	6	2	1	1	1	1	0	0	1	1	33	48	41
11.5824	1	3	2	2	0	1	0	0	2	1	39	44	32
11.607	3	1	0	0	1	3	1	0	2	0	58	57	50
11.6315	7	6	1	4	2	3	3	1	3	1	60	71	60
11.6561	14	6	7	3	1	0	0	4	3	1	95	115	102
11.6807	17	11	6	6	5	9	5	5	2	2	214	188	199
11.7053	24	19	31	7	5	11	5	6	7	8	346	354	321
11.7299	32	45	32	19	15	13	16	10	5	6	581	546	545
11.7545	65	52	56	30	31	26	27	18	19	10	919	909	922
11.7791	106	96	74	49	39	24	17	28	27	16	1415	1364	1331
11.8037	140	114	82	62	55	49	44	36	27	26	1859	1885	1831
11.8283	156	143	127	88	72	54	45	36	27	22	2229	2223	2174
11.8529	186	181	118	75	71	56	35	46	33	27	2503	2633	2507
11.8775	174	147	112	82	74	55	61	35	28	34	2576	2594	2540
11.902	169	148	108	93	67	51	42	44	27	31	2383	2507	2421
11.9266	138	101	96	75	76	44	36	25	27	18	2039	2049	2005
11.9512	96	77	70	45	31	31	42	25	20	19	1510	1591	1510
11.9758	73	73	49	41	35	25	17	13	12	22	1069	1140	1029
12.0004	41	37	31	21	15	19	8	12	7	5	696	638	702
12.025	15	16	25	13	10	9	7	6	5	5	387	399	407
12.0496	17	10	14	7	8	2	3	2	3	3	190	224	221
12.0742	5	9	7	3	10	3	3	0	2	1	111	107	112
12.0988	6	4	5	1	1	0	1	0	0	2	69	69	55
12.1234	4	3	1	0	2	0	1	1	0	0	41	41	43
12.148	3	1	3	1	0	0	0	0	0	0	31	22	26
12.1725	1	1	1	0	2	1	1	1	0	0	21	22	25
12.1971	1	0	0	2	1	1	0	0	1	0	26	23	27
12.2217	0	0	1	1	3	1	0	0	0	0	26	32	26
12.2463	0	1	2	1	0	1	0	0	0	0	26	20	21
12.2709	0	0	0	1	3	1	0	0	0	1	21	18	23
12.2955	1	2	1	0	0	0	0	1	1	1	36	20	20
12.3201	1	0	1	1	1	1	0	0	1	0	17	26	23
12.3447	1	1	1	0	1	2	1	0	0	0	23	30	28
12.3693	0	1	0	1	2	0	0	1	0	0	19	31	31
12.3939	1	3	3	1	1	0	0	1	1	1	33	28	24
12.4185	2	1	0	0	1	1	1	2	1	0	27	23	26
12.443	0	2	1	1	1	0	1	0	0	0	32	26	26
12.4676	0	5	2	0	0	0	1	0	1	0	32	24	27
12.4922	0	2	1	0	1	1	1	1	0	0	28	32	35
12.5168	1	1	3	2	0	2	0	0	0	0	28	30	27
12.5414	3	2	0	2	3	0	0	1	1	0	35	38	35
12.566	0	4	1	0	2	1	0	2	0	1	29	31	29
12.5906	1	0	2	1	1	1	1	0	0	0	36	28	30
12.6152	2	3	2	0	0	1	2	0	0	1	22	47	29
12.6398	0	0	1	1	0	1	1	1	0	1	48	41	35
12.6644	1	3	3	3	2	0	3	2	4	0	27	41	32
12.689	2	3	1	0	1	2	1	1	0	0	39	31	38
12.7135	3	2	3	2	1	3	0	1	2	0	38	31	36
12.7381	3	3	2	0	4	2	0	0	0	3	32	40	36
12.7627	1	6	4	0	0	0	1	2	0	0	46	42	43
12.7873	1	4	1	2	1	0	2	1	1	0	45	45	38
12.8119	0	1	3	0	2	1	0	1	0	0	26	35	45
12.8365	3	2	5	0	1	2	2	0	1	0	35	35	42
12.8611	4	2	3	1	1	4	0	2	1	0	53	55	44
12.8857	3	2	2	3	1	0	2	1	1	1	53	42	43
12.9103	2	4	1	1	0	0	1	3	2	0	47	51	37
12.9349	4	1	2	3	2	2	1	1	1	0	46	53	57
12.9595	3	4	3	3	0	3	2	1	1	2	53	42	43
12.984	1	2	1	0	3	2	1	0	1	0	55	57	49
13.0086	4	2	5	2	4	1	1	2	0	1	61	58	67
13.0332	4	5	3	3	2	0	1	0	3	1	70	67	57
13.0578	5	1	3	4	4	3	0	2	1	0	76	94	70
13.0824	6	2	4	6	5	2	1	3	0	1	104	97	96
13.107	10	12	7	9	3	5	2	2	2	2	144	151	157
13.1316	13	13	5	4	6	5	5	1	2	7	196	185	190
13.1562	13	12	20	6	6	7	3	2	2	4	269	229	270
13.1808	11	13	15	10	12	10	8	7	3	7	309	333	315
13.2054	28	30	21	15	6	9	5	7	7	8	411	421	364
13.23	29	20	30	20	14	9	6	5	9	7	416	397	384
13.2545	28	30	22	18	12	10	7	9	5	4	427	427	441
13.2791	26	23	16	16	19	5	9	10	3	8	408	388	426
13.3037	20	18	13	13	6	8	6	8	6	6	330	328	376
13.3283	17	18	16	12	2	4	5	6	5	2	298	274	279
13.3529	16	17	5	13	7	5	3	5	4	8	226	233	252
13.3775	9	13	11	4	3	1	2	1	4	0	162	190	189
13.4021	7	4	7	2	7	4	4	6	0	2	163	172	147
13.4267	5	3	2	3	5	2	1	4	3	2	127	112	145
13.4513	5	7	7	2	5	2	1	3	3	0	107	94	103
13.4759	7	6	4	3	2	0	3	1	0	1	112	96	97
13.5005	6	3	6	2	0	0	5	0	0	0	80	86	72
13.5251	3	3	2	2	4	2	2	3	2	1	70	86	80
13.5496	5	4	1	4	2	3	0	1	2	1	60	82	67
13.5742	6	1	4	2	1	0	3	3	0	0	65	61	73
13.5988	3	7	0	3	1	2	1	2	2	1	73	70	61
13.6234	2	2	2	2	2	2	1	1	0	0	65	64	69
13.648	4	3	3	1	5	1	2	1	0	1	89	73	78
13.6726	7	6	1	4	1	3	1	2	1	2	91	64	66
13.6972	5	4	2	3	1	1	2	0	3	1	58	68	76
13.7218	4	0	1	2	3	3	3	3	2	0	64	52	60
13.7464	5	7	3	3	2	0	1	1	0	2	58	70	75
13.771	5	5	7	5	3	1	0	1	2	4	74	87	71
13.7956	2	2	3	1	1	3	1	3	1	0	78	74	51
13.8201	3	3	4	3	2	6	2	3	1	1	91	82	75
13.8447	3	2	4	4	2	3	3	3	1	1	82	101	76
13.8693	5	5	5	4	3	1	1	1	3	1	91	89	70
13.8939	6	3	4	3	4	2	2	5	4	2	111	82	91
13.9185	7	6	4	4	4	2	1	5	2	2	127	140	108
13.9431	4	8	4	2	6	4	3	1	1	1	141	126	156
13.9677	5	10	6	2	6	2	7	2	3	1	158	140	143
13.9923	7	13	6	10	3	7	3	3	5	2	216	209	198
14.0169	10	8	3	7	11	6	8	7	3	4	218	245	206
14.0415	6	9	6	9	8	7	9	4	3	4	285	288	277
14.0661	6	11	6	12	10	4	8	6	2	1	280	320	291
14.0906	8	10	8	13	20	7	10	8	3	3	307	318	293
14.1152	5	16	3	12	8	8	6	8	5	5	313	319	301
14.1398	10	8	7	4	6	9	3	4	3	4	307	319	294
14.1644	5	10	8	8	9	8	3	4	3	3	295	250	247
14.189	8	6	10	9	6	8	6	6	2	2	200	226	239
14.2136	3	11	4	9	7	1	5	4	1	2	180	184	176
14.2382	8	12	3	13	7	2	3	4	3	0	162	152	149
14.2628	4	8	7	4	5	3	6	2	2	1	138	124	124
14.2874	7	8	7	5	1	2	5	2	5	2	122	125	121
14.312	7	5	8	3	4	2	4	2	2	0	121	119	128
14.3366	6	10	6	3	4	1	3	2	0	1	92	118	129
14.3611	6	6	4	6	2	2	2	5	4	3	106	106	110
14.3857	7	8	3	6	4	4	2	3	0	0	122	107	108
14.4103	10	13	7	5	3	4	1	1	1	4	114	117	108
14.4349	10	11	4	4	2	1	1	2	0	0	116	121	123
14.4595	13	6	2	5	4	5	1	1	2	1	136	132	120
14.4841	10	7	5	7	2	1	3	3	2	0	109	117	100
14.5087	9	4	6	2	4	3	2	0	2	1	124	140	109
14.5333	6	5	4	6	7	3	0	1	3	3	134	114	122
14.5579	6	11	3	8	6	4	4	3	1	1	143	142	138
14.5825	10	11	7	7	2	1	3	1	2	2	138	122	128
14.6071	5	6	7	5	4	4	1	4	0	3	116	111	110
14.6316	7	7	8	4	2	1	3	3	3	4	149	125	115
14.6562	6	8	4	4	3	6	4	1	4	2	138	129	142
14.6808	8	9	7	3	5	6	3	2	1	3	123	150	122
14.7054	7	9	8	6	1	5	4	1	4	4	148	129	144
14.73	6	8	7	7	2	2	5	2	1	1	134	132	130
14.7546	8	4	8	10	4	2	1	2	2	0	132	135	159
14.7792	11	6	7	4	4	4	0	2	3	1	122	151	137
14.8038	9	5	3	4	4	2	6	2	3	2	154	132	122
14.8284	6	8	11	5	5	2	3	3	2	4	152	175	133
14.853	11	8	5	4	4	3	1	2	0	0	149	154	154
14.8776	7	11	6	4	2	6	5	1	2	1	156	149	144
14.9021	5	9	5	3	2	9	3	3	0	1	155	153	140
14.9267	9	7	8	4	5	0	4	4	4	3	130	159	147
14.9513	9	9	7	4	7	2	2	1	1	1	145	148	151
14.9759	6	6	6	6	1	4	6	2	1	1	153	161	123
15.0005	15	9	9	5	5	5	2	5	3	5	129	135	152
15.0251	7	6	5	12	4	7	2	3	3	2	152	136	174
15.0497	4	6	3	7	9	6	0	2	3	3	133	140	150
15.0743	9	9	6	5	3	4	6	2	1	4	166	180	165
15.0989	9	14	7	5	5	2	3	4	2	1	156	166	146
15.1235	8	7	10	10	7	2	4	5	0	3	155	170	154
15.1481	15	8	5	6	5	7	5	5	5	0	163	146	153
15.1726	4	13	3	4	6	11	6	6	5	4	158	127	132
15.1972	5	14	5	10	3	4	4	5	2	4	168	163	156
15.2218	10	5	9	9	3	6	2	5	4	2	141	167	155
15.2464	14	6	6	6	2	1	4	1	4	2	165	138	163
15.271	7	8	11	7	5	5	7	4	4	2	166	151	184
15.2956	16	10	6	6	8	4	5	5	3	1	156	169	149
15.3202	8	10	4	11	4	4	8	3	3	5	145	176	163
15.3448	11	5	4	8	7	4	3	6	2	4	174	167	163
15.3694	8	10	5	14	5	7	6	0	2	4	170	169	187
15.394	10	8	9	5	4	8	4	5	4	5	191	166	175
15.4186	18	11	8	5	5	2	3	5	4	5	203	173	163
15.4431	8	8	7	5	5	3	3	3	1	0	175	171	178
15.4677	5	9	8	5	4	5	2	0	1	8	182	148	175
15.4923	17	12	12	5	9	6	4	2	6	1	195	176	191
15.5169	13	10	12	9	4	8	4	3	2	3	185	183	167
15.5415	10	5	5	10	5	4	3	9	3	4	193	184	177
15.5661	11	18	10	8	6	5	4	5	7	3	176	205	214
15.5907	15	10	9	7	8	3	5	5	5	1	190	195	176
15.6153	7	11	10	5	8	7	6	4	4	2	213	197	191
15.6399	10	9	10	6	7	5	5	5	3	2	196	193	192
15.6645	9	12	13	11	4	7	2	6	6	5	258	207	197
15.6891	16	13	8	10	1	5	5	3	3	1	203	228	221
15.7136	11	9	8	10	4	4	5	3	2	3	228	216	227
15.7382	9	9	6	8	2	2	4	7	6	2	234	232	241
15.7628	4	11	5	10	9	4	5	7	6	4	244	243	245
15.7874	17	9	4	7	10	8	4	7	3	1	236	213	253
15.812	12	6	6	5	5	6	8	7	1	2	245	250	259
15.8366	12	15	9	7	5	1	8	6	2	6	231	227	246
15.8612	11	13	10	6	7	7	3	4	8	3	237	222	228
15.8858	10	6	9	6	4	5	7	7	3	2	219	205	219
15.9104	12	15	8	7	2	7	7	3	1	4	223	219	213
15.935	9	10	9	7	5	4	8	6	3	2	237	223	230
15.9596	14	14	4	8	3	6	6	4	4	2	208	212	219
15.9841	10	7	11	14	7	2	4	2	3	3	239	235	220
16.0087	9	10	8	8	5	6	6	5	3	5	220	233	188
16.0333	7	12	7	7	2	5	8	4	2	1	207	229	199
16.0579	11	10	5	13	2	2	5	0	4	0	234	251	231
16.0825	8	11	7	7	6	9	7	2	3	2	208	217	210
16.1071	14	11	10	6	13	7	4	1	2	4	234	219	267
16.1317	17	16	8	12	3	5	5	5	6	4	209	221	240
16.1563	8	13	20	9	5	10	5	4	5	4	228	189	235
16.1809	13	6	13	6	10	4	9	4	4	3	223	249	240
16.2055	13	7	10	5	6	5	6	4	1	1	197	242	243
16.2301	13	12	12	7	5	8	4	6	3	5	239	225	241
16.2547	15	9	11	8	2	4	4	5	6	4	219	208	227
16.2792	9	13	12	8	2	6	6	4	6	1	213	223	236
16.3038	15	13	14	11	5	7	6	6	3	3	242	237	213
16.3284	10	7	15	8	6	7	5	2	0	5	220	256	241
16.353	12	11	14	9	6	4	8	6	3	2	232	215	230
16.3776	16	11	12	6	8	7	9	6	6	7	245	249	245
16.4022	15	8	14	10	13	4	14	3	5	4	195	214	239
16.4268	20	11	10	9	7	7	4	4	4	3	228	221	215
16.4514	13	12	5	6	5	7	5	7	6	4	215	245	226
16.476	15	12	13	11	8	6	8	6	6	3	237	226	237
16.5006	12	10	13	5	5	2	7	4	4	2	225	235	238
16.5252	17	11	10	13	10	7	7	5	3	4	241	233	245
16.5497	21	8	13	3	9	6	6	2	4	6	244	249	269
16.5743	12	16	9	17	5	6	5	8	3	4	237	208	232
16.5989	12	14	17	8	12	7	5	5	4	3	227	249	266
16.6235	19	15	12	8	9	8	6	2	5	2	228	260	236
16.6481	19	16	9	11	9	5	8	5	2	3	266	249	223
16.6727	15	7	9	5	5	5	6	3	5	4	239	252	281
16.6973	10	14	13	13	4	9	10	4	6	4	237	258	258
16.7219	11	13	9	6	6	9	4	8	5	3	257	256	261
16.7465	11	8	11	6	5	9	5	4	3	4	236	238	230
16.7711	14	14	13	13	9	7	5	5	6	3	250	264	231
16.7957	17	21	14	9	3	3	8	4	4	2	270	268	261
16.8202	13	19	13	5	10	3	5	1	3	4	281	257	250
16.8448	15	14	11	11	7	9	3	3	8	6	281	245	264
16.8694	13	14	16	11	11	9	2	4	4	5	235	255	228
16.894	15	7	13	11	7	7	5	7	2	4	268	246	246
16.9186	16	17	13	8	5	7	4	6	3	9	269	244	264
16.9432	10	14	16	13	4	8	7	4	5	4	272	261	278
16.9678	11	16	5	5	11	6	3	5	3	2	242	263	260
16.9924	13	11	4	11	8	11	7	8	5	5	297	263	265
17.017	13	12	17	10	7	10	6	4	7	5	250	252	281
17.0416	11	16	15	10	6	2	6	5	4	3	250	263	268
17.0662	13	13	17	11	10	10	3	7	3	2	265	246	267
17.0907	14	19	10	11	3	5	7	6	2	4	271	251	254
17.1153	13	12	11	11	10	8	6	10	9	4	280	292	245
17.1399	14	8	7	7	10	4	7	5	4	6	299	281	251
17.1645	17	8	13	13	10	6	5	9	5	5	259	264	265
17.1891	18	15	13	10	7	5	5	6	4	3	258	293	305
17.2137	13	15	12	11	6	6	7	8	3	2	259	263	255
17.2383	10	21	14	8	15	7	10	8	10	3	296	253	266
17.2629	18	15	8	11	9	8	8	5	7	2	288	292	278
17.2875	7	13	10	7	12	4	10	2	3	5	254	263	271
17.3121	17	16	9	7	9	6	2	6	7	3	246	281	297
17.3367	16	17	9	12	5	8	9	7	8	4	287	264	272
17.3612	14	10	16	9	6	8	7	4	2	1	289	282	263
17.3858	16	14	10	9	8	5	11	6	7	4	311	262	299
17.4104	15	8	7	8	7	4	9	4	8	2	311	289	280
17.435	14	20	12	11	7	9	8	6	2	7	293	292	285
17.4596	11	17	5	16	6	10	5	4	6	4	262	280	266
17.4842	17	11	9	12	7	7	3	6	5	7	295	285	293
17.5088	25	15	11	5	5	8	5	3	3	3	308	319	267
17.5334	23	15	16	8	6	4	5	7	4	8	301	284	310
17.558	13	17	17	10	10	5	8	5	4	7	302	312	286
17.5826	15	16	16	10	8	6	9	7	1	4	291	305	287
17.6072	11	7	17	9	14	7	6	7	1	2	291	262	294
17.6317	12	14	13	8	8	9	6	5	4	3	302	287	264
17.6563	15	12	10	13	7	4	5	7	3	3	278	264	299
17.6809	15	10	10	12	5	8	7	8	6	3	269	292	307
17.7055	19	13	10	4	8	7	8	4	2	4	287	341	288
17.7301	12	13	16	6	5	6	3	8	7	5	271	279	285
17.7547	18	13	15	6	10	3	3	5	9	5	314	275	285
17.7793	18	11	14	11	9	4	5	2	4	7	280	278	275
17.8039	14	11	6	6	11	7	7	9	5	6	291	282	287
17.8285	21	18	12	12	8	2	7	5	3	9	295	287	284
17.8531	18	7	11	4	12	13	6	5	9	6	289	292	306
17.8777	15	10	10	12	8	8	9	6	6	3	277	284	265
17.9022	13	13	18	17	7	9	9	5	2	5	287	285	271
17.9268	20	9	11	6	11	3	11	10	7	6	306	255	260
17.9514	16	14	15	17	8	6	6	4	2	8	287	290	307
17.976	18	15	12	9	12	7	6	4	10	3	279	302	283
18.0006	16	13	14	7	9	5	5	4	6	6	295	297	291
18.0252	13	17	12	7	10	4	7	7	7	3	291	280	288
18.0498	13	11	18	11	10	7	7	10	4	2	289	246	330
18.0744	10	6	12	5	11	6	5	4	6	2	285	266	281
18.099	20	13	12	8	5	7	6	6	5	7	240	314	303
18.1236	20	17	12	9	6	8	7	7	8	2	286	289	313
18.1482	9	20	10	10	7	7	9	3	8	5	281	306	295
18.1727	13	14	14	13	10	7	9	7	5	5	290	314	277
18.1973	22	14	16	12	8	6	5	11	1	4	307	326	319
18.2219	17	15	16	14	7	8	6	7	4	3	293	280	303
18.2465	10	12	10	12	10	4	5	3	8	6	300	317	284
18.2711	11	14	10	15	4	5	6	10	7	3	273	306	265
18.2957	12	21	12	7	12	9	6	6	8	6	265	282	319
18.3203	14	14	7	12	8	11	8	7	4	7	300	313	312
18.3449	25	18	9	13	9	5	7	7	7	3	324	291	277
18.3695	15	15	14	10	5	8	4	3	4	5	309	278	287
18.3941	21	15	12	13	6	10	1	7	4	6	312	274	308
18.4187	18	15	14	14	11	8	4	6	5	2	311	294	313
18.4432	11	10	16	9	10	9	6	5	5	4	300	279	303
18.4678	18	9	15	11	12	11	12	9	3	4	261	290	290
18.4924	12	17	15	12	7	7	11	6	4	7	318	317	289
18.517	17	8	16	7	4	6	6	5	1	6	290	315	284
18.5416	14	14	15	17	5	9	5	8	7	6	316	299	307
18.5662	9	7	11	11	11	8	6	4	8	7	282	292	296
18.5908	14	14	10	8	8	8	6	5	4	5	291	303	295
18.6154	13	13	7	7	9	4	5	7	11	4	320	307	301
18.64	17	19	10	12	8	2	7	3	6	7	282	296	307
18.6646	20	10	9	9	5	7	8	8	1	5	298	285	306
18.6892	22	21	16	14	8	8	10	3	4	8	315	294	306
18.7138	17	13	5	13	11	3	2	6	6	7	294	294	273
18.7383	16	17	14	15	2	8	6	4	8	8	302	270	293
18.7629	13	11	12	8	8	7	10	9	6	8	276	303	268
18.7875	15	9	17	13	9	7	10	4	1	2	294	337	317
18.8121	17	10	6	11	6	9	6	6	5	6	279	288	295
18.8367	18	18	18	6	7	11	11	6	5	2	303	301	308
18.8613	16	14	7	12	12	7	6	2	7	3	324	307	265
18.8859	9	11	16	9	12	11	5	4	4	6	294	297	308
18.9105	12	18	16	9	7	5	7	5	8	4	291	295	295
18.9351	18	15	15	8	9	11	7	4	3	6	304	297	301
18.9597	14	13	12	5	12	7	7	9	5	6	315	291	304
18.9843	13	7	9	10	5	5	5	8	2	4	279	279	264
19.0088	16	12	10	11	9	3	5	4	4	8	285	307	280
19.0334	15	17	10	9	8	6	6	7	3	3	309	330	277
19.058	13	13	17	8	9	9	11	3	9	7	316	286	291
19.0826	14	18	9	4	8	11	12	4	8	8	281	286	301
19.1072	21	12	20	9	7	13	9	7	2	3	318	355	291
19.1318	24	13	9	12	8	11	5	4	6	3	287	289	311
19.1564	14	21	7	8	13	7	12	3	7	4	318	286	301
19.181	14	7	10	9	9	11	10	1	6	4	284	307	286
19.2056	22	5	6	10	7	6	8	4	5	2	288	280	288
19.2302	8	11	16	7	15	10	6	3	0	4	291	286	303
19.2548	12	18	11	8	11	12	8	6	9	1	289	319	254
19.2793	16	13	10	16	13	8	7	7	8	3	281	290	310
19.3039	18	13	10	10	9	9	7	6	3	4	284	302	282
19.3285	20	14	10	12	12	3	7	2	5	2	304	306	289
19.3531	13	12	15	11	11	11	6	7	4	7	299	290	301
19.3777	17	12	10	18	6	8	9	3	7	1	314	321	310
19.4023	19	15	13	9	8	10	7	9	8	1	282	316	273
19.4269	19	12	12	10	7	3	11	4	3	7	300	314	325
19.4515	10	16	12	9	12	8	6	5	10	5	280	327	286
19.4761	11	10	15	10	11	5	6	5	5	6	295	281	287
19.5007	26	20	13	11	11	6	3	8	5	3	306	294	288
19.5253	15	13	8	11	9	8	4	6	6	2	262	294	322
19.5498	13	15	11	12	11	5	9	1	9	7	297	260	293
19.5744	15	18	15	13	4	8	6	7	5	4	302	287	274
19.599	13	15	3	14	10	5	6	4	4	5	293	290	266
19.6236	19	12	10	9	7	10	5	6	11	8	283	280	292
19.6482	16	10	13	12	6	4	9	11	3	7	296	302	281
19.6728	22	22	10	11	14	11	6	8	4	5	308	269	303
19.6974	14	10	15	7	11	5	6	10	7	5	274	297	307
19.722	14	14	6	11	10	3	8	6	7	5	284	292	296
19.7466	15	17	7	8	7	7	3	8	4	8	294	272	268
19.7712	17	15	9	8	7	10	2	9	7	9	293	298	275
19.7958	8	12	6	12	8	5	9	5	5	4	271	274	293
19.8203	12	14	7	8	8	4	5	8	10	4	298	302	317
19.8449	15	9	13	6	11	6	4	4	6	6	300	276	266
19.8695	17	12	13	8	5	8	9	3	4	6	271	269	282
19.8941	17	16	15	7	14	9	13	7	4	4	294	281	242
19.9187	17	17	17	5	10	5	3	2	6	5	270	329	270
19.9433	17	18	8	12	7	7	6	6	3	6	312	283	299
19.9679	12	11	5	18	7	4	6	6	6	6	287	301	243
19.9925	7	7	10	5	9	7	3	4	7	5	258	287	233
20.0171	19	7	7	6	9	8	4	9	8	4	294	291	273
20.0417	10	13	10	13	9	5	4	6	7	3	261	285	247
20.0663	16	11	5	6	11	3	8	6	4	1	279	255	263
20.0908	19	14	9	16	7	5	4	7	4	0	302	296	292
20.1154	22	3	15	7	9	8	9	6	4	6	256	259	275
20.14	9	20	12	9	12	6	3	1	2	7	238	262	276
20.1646	12	15	6	12	6	3	7	7	3	9	237	268	279
20.1892	9	14	14	7	10	10	7	6	5	0	269	274	257
20.2138	22	10	15	6	4	4	3	4	5	5	249	288	296
20.2384	13	8	11	10	6	7	9	8	10	5	259	248	250
20.263	15	19	11	10	9	5	4	4	4	8	293	268	293
20.2876	13	16	10	8	10	6	1	7	5	1	267	260	266
20.3122	13	14	11	8	8	6	6	9	1	2	260	239	240
20.3368	8	14	17	11	6	6	6	3	2	7	255	241	271
20.3613	7	14	8	14	5	12	7	6	5	6	280	252	257
20.3859	18	13	16	8	7	4	7	7	4	0	259	250	248
20.4105	14	18	10	11	3	16	4	4	7	4	259	292	235
20.4351	6	11	12	9	11	9	4	6	6	6	278	283	258
20.4597	9	9	8	8	4	9	6	2	4	5	286	268	252
20.4843	9	9	11	3	7	7	7	8	4	7	279	230	248
20.5089	9	9	5	9	14	8	2	6	6	2	274	254	255
20.5335	16	11	12	14	8	9	2	5	3	3	279	244	278
20.5581	11	11	11	9	5	6	5	4	3	6	238	276	273
20.5827	20	13	8	8	7	10	16	6	3	4	265	223	224
20.6073	11	9	18	7	8	1	6	5	2	2	238	249	235
20.6318	10	7	12	5	12	5	5	7	2	5	240	251	270
20.6564	11	16	11	10	6	10	4	6	7	2	241	264	271
20.681	7	17	8	8	8	5	5	6	6	5	263	244	240
20.7056	14	20	11	9	13	2	6	5	2	6	248	237	233
20.7302	11	12	10	11	5	9	4	9	9	1	224	275	278
20.7548	9	10	10	7	8	7	8	6	5	4	250	273	231
20.7794	12	8	7	13	9	4	6	4	8	3	254	253	245
20.804	15	6	13	5	9	8	6	6	7	2	263	208	268
20.8286	7	17	9	8	6	12	7	3	4	6	223	264	248
20.8532	9	14	11	9	4	7	6	3	4	3	239	268	248
20.8778	14	11	8	8	10	2	2	10	4	10	246	265	224
20.9023	12	11	14	7	6	5	4	4	7	0	269	255	231
20.9269	8	19	12	5	4	9	5	13	3	4	252	238	250
20.9515	11	12	10	6	7	11	3	4	6	2	246	233	251
20.9761	11	8	6	6	8	5	3	3	3	4	258	249	224
21.0007	13	11	6	9	6	5	3	3	5	7	263	265	246
21.0253	13	10	9	7	8	6	5	6	5	5	226	263	238
21.0499	14	10	9	9	4	12	4	6	4	7	229	235	244
21.0745	12	13	6	9	7	7	7	5	1	3	236	245	241
21.0991	12	14	7	8	3	8	4	9	5	5	230	259	244
21.1237	15	11	7	14	6	6	7	9	7	3	226	244	249
21.1483	11	6	15	10	8	6	8	9	4	3	244	215	237
21.1729	13	8	8	8	5	6	6	3	1	4	247	238	244
21.1974	8	9	15	2	6	7	8	2	4	4	208	238	234
21.222	11	12	11	7	8	10	5	5	6	6	242	250	202
21.2466	14	4	9	7	5	6	6	3	9	5	225	248	253
21.2712	5	13	12	9	5	5	4	4	6	4	245	228	223
21.2958	18	11	7	5	9	11	1	14	8	1	234	246	240
21.3204	10	10	4	11	7	8	4	3	4	2	261	233	238
21.345	9	8	15	12	7	9	3	5	5	4	247	223	227
21.3696	12	12	12	13	9	5	2	5	5	3	262	238	223
21.3942	13	7	10	9	9	8	4	3	4	5	212	200	257
21.4188	13	11	7	8	2	8	7	5	3	4	238	229	234
21.4434	6	6	9	8	5	5	3	6	4	3	238	221	218
21.4679	7	7	10	7	8	7	7	7	4	1	245	222	211
21.4925	10	10	12	10	4	4	5	4	2	3	200	243	222
21.5171	9	8	11	3	7	5	6	4	2	8	219	209	215
21.5417	13	14	11	8	3	5	4	4	2	4	212	212	217
21.5663	12	9	6	4	4	10	3	2	3	7	230	221	202
21.5909	13	10	8	9	8	4	6	4	3	4	220	228	253
21.6155	5	9	13	7	4	8	8	4	3	4	228	206	235
21.6401	8	15	4	4	8	3	6	5	5	5	226	230	204
21.6647	6	14	13	9	8	9	7	6	5	3	229	216	205
21.6893	7	15	8	10	4	10	3	1	4	6	218	207	225
21.7139	6	8	7	6	3	4	6	4	4	4	239	222	212
21.7384	10	8	10	8	9	6	1	1	4	3	226	202	183
21.763	12	7	7	4	4	4	8	6	1	3	214	207	213
21.7876	3	7	2	10	9	4	3	2	4	5	216	215	189
21.8122	8	4	5	7	3	10	3	2	1	3	222	191	215
21.8368	12	7	10	10	6	5	0	7	2	1	222	207	227
21.8614	11	12	7	5	6	4	4	7	3	3	222	224	223
21.886	10	6	4	4	10	4	1	3	5	4	246	223	213
21.9106	9	9	6	8	3	6	4	7	4	5	209	184	220
21.9352	9	8	8	6	15	3	6	3	0	3	208	182	210
21.9598	12	8	8	13	9	8	7	6	4	3	187	191	215
21.9844	16	11	5	9	6	8	4	4	3	3	206	227	207
22.0089	9	8	11	8	7	5	7	1	2	0	216	217	192
22.0335	11	5	7	9	5	2	4	6	2	5	184	188	206
22.0581	11	4	9	4	5	6	3	3	3	3	201	197	177
22.0827	7	6	9	4	8	5	3	9	5	4	198	187	211
22.1073	8	11	13	6	8	8	5	5	0	0	206	204	193
22.1319	9	11	6	5	1	6	6	2	4	5	201	162	230
22.1565	9	9	6	7	6	3	5	5	4	5	200	209	211
22.1811	11	13	5	7	3	3	6	6	6	4	205	190	204
22.2057	12	4	6	7	10	2	5	6	5	4	214	211	210
22.2303	9	8	15	7	2	1	3	1	7	2	197	216	208
22.2549	10	11	5	7	5	4	4	6	4	1	175	174	205
22.2794	5	9	9	12	3	6	6	2	2	0	180	184	190
22.304	9	10	6	12	4	5	2	1	0	3	177	189	195
22.3286	6	8	9	8	9	4	6	3	4	2	183	184	187
22.3532	7	9	5	6	9	4	2	3	2	5	180	184	206
22.3778	6	5	5	12	6	13	5	4	2	5	184	185	188
22.4024	9	11	6	7	10	0	4	4	4	1	169	184	178
22.427	5	7	7	4	7	4	3	4	1	4	187	171	196
22.4516	10	7	6	9	7	5	3	1	4	6	185	179	194
22.4762	7	6	5	9	10	4	3	3	5	5	201	178	193
22.5008	7	7	6	3	5	6	7	2	3	2	164	188	188
22.5254	6	11	5	5	8	4	2	3	3	2	209	190	193
22.5499	5	5	6	7	4	7	1	3	7	2	187	182	172
22.5745	10	3	8	7	12	3	4	5	3	4	197	179	167
22.5991	5	4	4	5	6	4	8	3	4	4	195	187	202
22.6237	5	8	5	3	8	4	6	2	5	1	220	159	198
22.6483	6	5	8	8	8	2	4	3	0	1	161	181	157
22.6729	6	4	11	4	5	8	6	3	4	2	179	188	182
22.6975	8	4	9	2	5	4	2	6	3	3	166	176	180
22.7221	5	15	6	6	6	4	4	5	3	3	177	190	168
22.7467	6	7	8	6	9	8	3	10	1	2	190	178	160
22.7713	4	8	8	7	4	6	3	3	4	1	174	166	161
22.7959	8	10	4	5	7	9	6	0	3	7	163	193	181
22.8204	6	7	8	8	4	5	1	2	6	1	163	165	140
22.845	11	9	7	7	7	2	8	4	5	4	165	163	182
22.8696	4	7	9	3	3	4	8	3	2	1	191	159	131
22.8942	8	8	6	6	6	5	3	6	3	0	165	170	196
22.9188	9	8	5	5	4	3	5	2	2	2	192	183	172
22.9434	8	7	11	4	4	0	3	4	4	2	174	186	153
22.968	7	4	3	2	7	5	6	3	2	4	152	160	142
22.9926	7	4	8	7	8	7	4	6	2	2	151	164	157
23.0172	9	5	5	8	6	7	4	3	2	2	164	186	169
23.0418	8	8	5	9	3	6	2	2	1	3	165	173	160
23.0664	6	9	11	10	7	3	3	3	3	4	163	159	160
23.0909	10	4	7	6	4	2	3	3	4	4	185	164	168
23.1155	7	5	11	7	6	3	1	5	4	2	149	169	157
23.1401	11	4	7	6	4	4	8	4	2	7	172	165	147
23.1647	5	4	4	2	3	2	5	3	2	1	147	156	154
23.1893	10	5	4	9	6	2	5	2	3	2	163	163	163
23.2139	3	6	5	6	5	4	2	4	8	2	148	155	139
23.2385	10	4	5	5	3	0	4	3	0	3	144	142	161
23.2631	1	8	5	3	5	6	6	1	5	1	160	152	146
23.2877	5	6	11	5	4	3	5	1	3	6	161	135	137
23.3123	5	4	5	4	3	3	5	1	2	1	160	159	166
23.3369	8	6	4	2	3	3	5	1	2	2	143	151	139
23.3615	11	8	4	7	8	6	1	1	0	1	136	154	171
23.386	8	2	5	6	4	4	4	7	4	4	141	151	155
23.4106	9	5	10	7	2	5	4	0	3	5	157	173	131
23.4352	6	3	3	4	2	4	2	3	3	3	156	116	132
23.4598	6	5	8	2	4	6	2	0	3	5	148	148	139
23.4844	7	3	6	5	6	5	5	4	5	2	150	138	166
23.509	6	3	8	2	1	3	6	3	3	4	146	151	143
23.5336	4	6	8	8	7	2	5	1	1	1	152	155	139
23.5582	5	9	6	5	4	3	2	2	2	3	128	153	154
23.5828	4	8	7	6	6	4	1	3	3	0	141	156	122
23.6074	8	10	2	1	9	5	2	3	4	5	140	134	137
23.632	6	8	5	3	3	3	1	5	2	2	136	148	123
23.6565	5	5	8	5	4	5	5	1	3	3	157	147	117
23.6811	7	4	2	1	3	0	3	6	1	2	139	147	143
23.7057	6	8	2	5	7	4	3	5	2	2	157	143	145
23.7303	4	8	6	3	1	2	3	1	3	4	131	146	127
23.7549	6	2	3	1	6	5	8	2	5	0	154	152	157
23.7795	5	7	3	4	4	2	3	2	0	3	151	131	117
23.8041	8	3	5	4	3	4	1	4	2	7	138	120	144
23.8287	9	8	5	4	2	4	5	4	2	2	136	108	156
23.8533	6	8	3	7	6	5	2	6	0	2	138	150	141
23.8779	4	11	11	4	4	3	2	2	0	2	131	126	139
23.9025	1	3	6	3	9	6	4	3	4	3	119	132	121
23.927	2	2	4	1	3	4	2	4	4	0	145	153	148
23.9516	7	4	3	5	2	1	4	3	2	3	138	138	110
23.9762	9	5	4	6	4	4	7	3	1	0	160	134	129
24.0008	8	7	2	5	3	0	2	2	2	2	141	151	131
24.0254	4	8	7	6	6	4	5	3	2	4	140	146	143
24.05	8	3	3	7	8	7	1	3	0	1	123	148	108
24.0746	6	7	4	2	5	2	5	2	0	4	126	136	130
24.0992	5	9	3	2	5	4	3	2	2	2	129	128	135
24.1238	7	5	4	7	6	4	5	3	4	0	109	126	123
24.1484	6	5	3	6	3	1	3	2	3	4	141	127	128
24.173	5	3	3	2	5	6	3	3	3	0	140	109	145
24.1975	4	7	7	5	5	2	3	3	1	2	118	128	133
24.2221	4	4	6	2	5	4	4	2	3	3	133	130	121
24.2467	1	4	3	5	5	3	1	2	1	1	111	116	113
24.2713	9	7	6	7	3	6	6	3	3	3	145	127	121
24.2959	6	3	5	5	5	1	4	4	7	3	127	125	111
24.3205	5	9	3	2	2	3	2	1	3	2	113	113	135
24.3451	7	10	2	5	3	4	1	4	0	4	116	116	123
24.3697	4	6	5	4	5	2	2	4	3	1	125	115	128
24.3943	1	5	2	2	2	2	7	1	1	1	120	142	128
24.4189	6	7	0	4	6	2	2	0	2	2	125	116	138
24.4435	2	3	3	6	5	2	1	3	2	0	111	140	123
24.468	2	6	5	2	2	3	4	0	1	0	108	126	110
24.4926	3	7	6	8	6	2	4	3	2	0	133	132	124
24.5172	5	3	3	3	2	1	2	5	2	4	119	111	126
24.5418	2	4	6	4	4	4	5	3	2	0	109	133	118
24.5664	7	2	6	4	3	5	0	3	2	1	116	99	109
24.591	6	0	4	5	4	4	5	4	3	2	125	101	104
24.6156	4	6	1	6	1	5	5	2	1	2	112	106	118
24.6402	7	4	4	5	5	4	2	1	3	5	118	110	101
24.6648	5	7	3	5	1	2	2	3	4	1	95	123	143
24.6894	4	1	1	8	3	3	5	2	5	0	95	125	117
24.714	5	3	2	1	4	1	4	4	4	3	128	133	90
24.7385	5	3	6	1	5	3	3	1	3	0	92	118	101
24.7631	3	3	5	4	1	1	3	3	3	1	100	111	128
24.7877	4	4	1	1	1	2	3	1	5	1	102	119	89
24.8123	3	5	2	3	4	3	3	5	1	0	127	97	109
24.8369	1	8	3	5	3	1	5	2	2	3	117	122	102
24.8615	6	14	3	2	4	1	0	5	4	3	112	108	111
24.8861	5	3	7	2	2	2	5	3	3	0	108	100	116
24.9107	11	2	3	2	4	4	1	1	2	1	98	100	132
24.9353	1	2	2	3	3	3	3	2	3	0	102	97	115
24.9599	5	4	3	0	6	1	2	2	2	3	116	106	109
24.9845	3	2	6	4	3	3	2	2	1	2	92	99	101
25.009	5	4	5	4	4	3	3	1	1	1	109	117	92
25.0336	1	4	0	1	1	0	2	2	3	3	120	112	86
25.0582	4	8	3	4	2	4	1	2	2	1	100	113	107
25.0828	4	4	2	4	4	1	7	0	1	0	121	103	107
25.1074	6	1	2	4	0	0	2	2	1	1	91	94	117
25.132	4	4	5	5	4	2	4	1	0	1	106	93	102
25.1566	3	4	5	6	7	3	6	3	0	1	81	87	109
25.1812	4	6	2	2	4	2	2	5	5	2	86	86	97
25.2058	6	3	5	5	4	1	5	2	1	3	110	78	106
25.2304	1	5	6	0	5	0	4	1	0	4	94	105	95
25.255	3	3	5	3	3	2	2	4	0	2	101	109	100
25.2795	1	4	3	6	1	2	2	1	1	4	84	93	94
25.3041	1	4	1	3	3	3	4	0	2	4	92	104	98
25.3287	5	2	6	3	6	3	3	3	2	0	105	113	84
25.3533	9	5	1	5	0	2	2	2	0	1	97	97	106
25.3779	2	3	5	0	2	4	4	2	2	1	79	84	82
25.4025	4	0	6	6	3	0	1	2	3	4	80	96	101
25.4271	2	1	0	6	1	1	2	1	0	0	91	110	78
25.4517	1	3	4	4	4	0	2	1	3	4	88	76	87
25.4763	3	5	3	4	4	1	2	0	0	1	96	101	79
25.5009	4	2	3	3	0	2	0	3	3	0	100	81	88
25.5255	5	1	6	4	1	2	3	1	1	1	85	90	84
25.55	2	4	5	0	4	3	4	0	1	1	78	96	91
25.5746	2	3	3	4	2	4	1	6	2	0	99	92	82
25.5992	2	3	6	3	0	2	4	2	3	3	77	94	95
25.6238	3	5	3	1	6	3	1	1	1	1	84	75	87
25.6484	3	4	2	2	1	2	2	4	6	4	92	76	110
25.673	3	3	3	4	6	1	4	6	3	4	87	84	96
25.6976	3	5	0	6	0	1	6	0	1	1	80	85	91
25.7222	2	4	2	4	3	3	5	0	0	2	83	77	70
25.7468	5	3	4	3	5	2	3	0	2	2	77	80	97
25.7714	7	3	4	1	2	3	3	1	2	1	87	83	83
25.796	2	6	5	3	2	2	0	1	1	2	86	85	82
25.8206	5	3	2	0	2	2	2	1	1	0	83	79	90
25.8451	4	5	6	1	0	1	1	2	0	3	68	99	97
25.8697	2	3	5	4	6	2	1	2	3	2	82	95	86
25.8943	2	6	2	3	3	3	2	2	2	1	70	80	81
25.9189	5	4	2	0	5	1	2	1	2	0	76	77	84
25.9435	7	4	1	2	7	2	3	4	1	0	82	89	76
25.9681	4	2	3	2	3	3	2	2	4	1	77	78	93
25.9927	6	4	5	3	5	1	2	1	2	0	86	70	88
26.0173	4	3	8	0	3	1	2	2	1	1	77	83	79
26.0419	6	4	2	0	0	2	4	0	2	1	75	70	85
26.0665	4	3	2	5	3	2	0	2	1	3	78	71	69
26.0911	2	3	1	5	0	1	2	1	2	2	74	75	71
26.1156	1	6	2	1	2	3	2	1	1	2	68	83	80
26.1402	2	2	5	2	3	2	0	3	2	1	91	79	83
26.1648	3	3	4	0	5	1	1	2	1	1	74	86	94
26.1894	2	2	1	4	1	0	1	0	3	1	76	72	85
26.214	2	2	2	4	2	2	1	3	1	0	51	93	64
26.2386	4	5	6	1	3	2	4	0	2	0	88	74	77
26.2632	1	6	2	3	2	1	6	3	5	2	57	78	86
26.2878	4	4	2	2	4	4	3	1	1	1	73	61	71
26.3124	1	3	2	4	2	2	2	2	1	1	74	73	69
26.337	3	0	1	0	3	2	3	1	2	3	85	78	80
26.3616	7	2	4	1	2	4	4	0	1	2	81	75	77
26.3861	5	1	4	2	1	2	4	3	2	0	78	72	64
26.4107	4	4	1	4	1	2	1	3	0	0	76	66	73
26.4353	2	1	1	1	3	4	4	3	2	3	67	74	80
26.4599	4	4	3	0	0	1	1	0	1	4	82	71	67
26.4845	1	1	4	2	0	1	3	0	2	1	63	68	73
26.5091	0	1	4	2	4	0	0	1	2	1	63	54	61
26.5337	2	3	1	4	3	2	0	1	4	1	102	75	85
26.5583	3	6	2	2	4	1	1	1	1	4	72	64	74
26.5829	2	4	2	6	3	3	2	2	1	2	66	63	76
26.6075	4	5	1	1	2	2	1	0	1	2	71	80	63
26.6321	1	0	1	2	1	0	3	1	3	2	66	53	72
26.6566	1	1	3	2	4	1	1	1	3	2	94	65	76
26.6812	3	1	1	4	1	1	2	4	0	1	70	61	71
26.7058	1	2	3	2	1	2	3	2	3	2	66	60	70
26.7304	1	4	1	0	0	0	2	1	1	3	73	71	67
26.755	5	3	2	3	2	2	1	2	1	5	64	65	65
26.7796	3	1	2	3	0	1	2	2	0	3	67	67	63
26.8042	3	2	7	2	3	2	3	1	4	0	69	59	59
26.8288	1	1	1	4	3	2	1	0	3	1	78	54	67
26.8534	1	2	1	2	0	1	1	1	4	0	64	64	58
26.878	2	1	2	1	1	2	0	2	0	2	61	75	78
26.9026	2	1	1	1	2	0	2	1	1	0	64	48	65
26.9271	2	2	0	1	4	0	1	1	1	1	50	55	72
26.9517	3	2	4	0	2	4	2	2	3	0	67	69	70
26.9763	1	3	2	2	3	0	2	4	1	0	69	75	51
27.0009	1	4	1	3	2	1	0	0	0	0	67	63	58
27.0255	1	5	2	1	0	3	3	2	2	4	58	70	68
27.0501	3	0	3	1	0	1	2	1	1	0	65	50	56
27.0747	8	4	0	2	0	1	0	2	0	1	48	68	66
27.0993	2	2	2	1	4	0	3	1	0	0	59	56	59
27.1239	1	4	4	2	1	4	4	2	1	1	67	53	69
27.1485	1	2	2	2	2	2	2	0	0	1	54	55	55
27.1731	2	1	3	2	3	4	1	1	1	3	58	48	62
27.1976	1	1	1	2	5	3	0	2	0	1	67	62	59
27.2222	1	1	1	1	0	2	0	1	0	0	70	59	75
27.2468	3	2	2	1	2	2	1	1	1	1	63	63	62
27.2714	2	3	2	0	1	1	1	1	2	1	52	59	68
27.296	4	1	0	5	4	1	1	0	0	1	68	48	74
27.3206	1	1	2	2	0	2	1	2	3	2	43	69	48
27.3452	0	2	1	3	1	3	1	2	1	0	50	52	60
27.3698	3	3	3	3	1	2	0	0	2	1	56	54	50
27.3944	0	0	1	0	0	0	4	1	3	4	51	52	50
27.419	0	4	2	1	4	2	0	4	0	2	53	50	68
27.4436	2	2	5	1	0	0	2	1	1	1	69	63	44
27.4681	3	3	1	1	3	1	1	2	2	1	54	55	50
27.4927	2	2	1	1	3	3	5	3	0	0	60	56	49
27.5173	4	6	2	1	3	2	0	1	2	0	51	65	58
27.5419	4	2	4	4	1	4	3	1	1	0	60	59	51
27.5665	3	3	1	1	2	2	2	1	0	3	47	61	53
27.5911	6	1	1	0	1	2	0	0	1	0	59	43	55
27.6157	2	4	3	1	0	1	4	2	1	1	58	57	50
27.6403	1	1	1	4	2	1	1	0	2	1	54	43	54
27.6649	3	2	4	3	1	3	3	2	1	0	60	43	63
27.6895	4	4	1	1	2	1	0	0	1	3	45	54	56
27.7141	3	3	2	1	0	2	3	1	1	1	61	48	41
27.7386	1	1	0	0	1	0	6	2	1	1	54	50	54
27.7632	1	2	2	1	2	1	0	3	0	1	46	56	54
27.7878	2	2	1	2	4	1	0	0	1	2	39	41	56
27.8124	2	2	1	3	0	2	1	1	2	2	54	45	41
27.837	4	3	1	1	3	0	2	2	0	1	45	61	48
27.8616	3	2	2	0	4	1	2	0	0	1	43	57	54
27.8862	1	1	4	5	3	3	1	1	2	0	39	52	43
27.9108	1	0	2	0	4	0	3	2	1	2	45	38	64
27.9354	0	0	1	1	2	2	0	1	1	2	47	43	46
27.96	2	2	2	1	2	3	1	0	4	0	60	50	36
27.9846	2	2	2	0	0	1	2	1	1	0	59	55	41
28.0091	1	3	1	2	3	0	2	2	2	1	54	38	42
28.0337	0	1	2	5	1	1	0	2	1	0	55	58	45
28.0583	1	1	1	0	2	2	2	3	1	1	40	47	40
28.0829	2	1	1	4	0	2	1	1	1	0	53	52	54
28.1075	2	2	2	3	1	0	2	2	1	0	38	61	45
28.1321	4	1	0	2	1	0	1	1	0	2	50	45	38
28.1567	2	3	3	2	1	4	1	1	1	2	31	52	44
28.1813	3	1	2	1	0	2	0	0	3	4	48	46	55
28.2059	0	1	1	2	1	1	2	1	0	1	52	51	51
28.2305	2	0	1	2	1	1	0	4	0	0	52	43	44
28.2551	1	3	1	2	2	3	1	3	0	0	40	33	47
28.2797	1	2	1	3	1	2	1	0	0	0	48	41	44
28.3042	1	1	4	0	2	1	1	0	1	1	39	40	41
28.3288	2	0	2	2	3	1	1	3	1	2	37	42	42
28.3534	0	2	3	0	4	2	1	1	1	2	43	43	44
28.378	3	1	1	1	2	0	2	1	0	1	41	52	45
28.4026	1	1	4	1	0	2	1	1	1	2	53	44	45
28.4272	1	3	1	1	1	1	1	1	1	0	44	37	56
28.4518	2	1	1	2	0	1	1	0	0	1	51	29	30
28.4764	2	1	2	1	0	2	2	1	0	1	48	35	54
28.501	1	1	1	0	2	0	1	1	1	1	47	46	48
28.5256	3	2	0	0	1	1	0	1	1	0	35	45	34
28.5502	1	1	3	2	1	1	0	2	0	1	28	42	54
28.5747	2	1	0	0	1	2	3	3	1	3	33	50	35
28.5993	1	1	2	3	0	0	0	2	0	1	32	43	41
28.6239	3	0	1	0	2	0	1	1	2	1	43	44	36
28.6485	0	1	2	0	1	1	1	0	2	1	28	42	40
28.6731	1	1	1	0	1	1	4	3	0	0	35	31	35
28.6977	2	2	2	3	2	1	2	1	2	1	43	34	31
28.7223	0	1	1	0	0	2	2	2	2	1	39	28	38
28.7469	3	1	0	1	2	2	1	2	0	1	34	49	37
28.7715	0	3	2	1	1	1	0	0	0	1	41	44	36
28.7961	1	2	1	0	0	0	0	0	2	1	42	44	36
28.8207	1	0	1	2	0	1	1	2	0	0	37	35	31
28.8452	1	1	0	0	2	0	0	1	0	1	38	31	33
28.8698	2	0	0	1	2	1	1	2	1	2	34	36	33
28.8944	3	1	0	2	1	1	2	4	0	0	42	36	32
28.919	2	1	0	1	0	2	1	2	1	1	42	40	26
28.9436	0	2	1	3	1	0	3	0	1	0	35	40	37
28.9682	2	1	1	0	2	1	1	1	1	1	39	36	40
28.9928	1	0	0	2	1	0	2	0	2	1	43	43	41
29.0174	2	0	2	2	1	0	1	0	1	0	31	33	34
29.042	4	0	4	2	2	1	1	0	2	0	39	45	36
29.0666	0	0	1	1	0	1	1	0	1	1	40	40	40
29.0912	0	3	3	1	3	1	0	1	2	0	34	33	41
29.1157	5	0	2	0	0	1	0	0	1	2	49	37	35
29.1403	0	2	0	1	0	3	1	3	1	0	40	32	42
29.1649	1	2	2	0	1	1	1	0	0	0	40	26	34
29.1895	0	0	1	1	1	1	0	0	1	2	45	34	37
29.2141	1	1	3	0	2	0	0	3	1	2	45	34	34
29.2387	2	1	1	2	2	0	1	1	0	2	32	29	39
29.2633	0	1	4	2	0	2	0	1	1	0	35	24	38
29.2879	2	1	2	2	2	1	4	0	0	1	32	35	31
29.3125	1	2	2	2	1	0	2	0	0	1	33	35	37
29.3371	2	1	0	2	1	2	0	1	1	1	42	38	35
29.3617	1	3	1	1	2	1	2	1	1	0	35	30	36
29.3862	1	3	0	0	3	0	1	2	0	1	30	27	37
29.4108	0	2	1	1	2	0	1	2	0	0	35	34	26
29.4354	2	0	0	1	1	0	2	0	0	0	38	41	36
29.46	1	0	3	1	2	0	5	1	1	1	36	39	28
29.4846	0	0	0	1	3	2	0	0	0	2	40	32	32
29.5092	0	1	0	1	2	1	1	0	0	1	26	44	27
29.5338	1	0	0	0	1	2	0	1	0	2	33	34	40
29.5584	1	1	1	0	1	0	0	0	1	0	22	30	39
29.583	1	1	2	3	0	0	0	1	0	2	32	27	35
29.6076	1	4	0	1	1	1	0	1	0	1	31	39	30
29.6322	2	0	0	1	2	0	0	0	3	3	27	29	30
29.6567	0	1	0	2	0	3	0	0	0	1	41	36	23
29.6813	1	0	0	0	1	0	0	0	0	0	32	32	38
29.7059	0	0	0	2	2	0	0	0	1	1	25	28	31
29.7305	1	1	2	1	0	1	0	1	3	0	37	40	33
29.7551	0	0	1	0	0	0	1	2	0	0	36	33	25
29.7797	0	0	0	1	2	2	1	1	0	1	41	27	32
29.8043	1	3	0	3	0	1	1	0	0	1	39	28	32
29.8289	0	1	1	0	0	0	0	0	3	2	30	40	34
29.8535	1	0	1	0	0	0	0	0	1	1	36	34	29
29.8781	0	0	2	0	3	1	0	2	0	1	33	22	28
29.9027	0	1	1	1	0	0	1	0	0	1	35	29	30
29.9272	0	0	0	1	1	0	1	1	0	1	20	35	20
29.9518	2	0	1	3	1	2	0	0	0	0	31	33	30
29.9764	3	2	1	0	2	1	1	1	0	1	34	24	33
30.001	0	1	1	1	1	0	0	0	1	0	24	21	27
30.0256	0	1	0	0	2	2	0	0	2	1	20	26	23
30.0502	1	2	1	1	1	3	5	2	0	0	31	36	31
30.0748	0	0	1	0	1	2	1	0	2	0	27	26	24
30.0994	1	1	0	1	3	1	0	1	0	0	27	35	23
30.124	1	1	2	2	0	1	2	1	2	0	28	27	32
30.1486	2	1	3	1	0	0	0	0	0	0	28	24	22
30.1732	0	0	0	0	0	1	0	1	0	1	31	19	18
30.1977	1	0	0	2	2	1	0	1	0	1	25	33	18
30.2223	0	1	1	0	1	2	1	0	1	0	31	29	19
30.2469	1	1	1	1	1	1	0	1	0	1	28	36	25
30.2715	2	2	0	1	1	3	1	1	1	1	23	34	29
30.2961	0	2	0	1	1	1	1	0	2	0	23	33	14
30.3207	1	1	0	1	0	0	1	1	0	1	28	27	22
30.3453	2	0	0	2	1	1	0	0	0	0	30	26	30
30.3699	0	0	0	2	1	0	1	0	0	0	22	31	15
30.3945	1	2	1	3	1	0	0	0	1	0	26	27	17
30.4191	0	0	1	1	0	2	1	1	0	1	22	25	26
30.4437	0	1	0	1	2	1	3	1	2	2	24	36	19
30.4682	0	0	0	1	1	1	4	0	0	1	35	28	18
30.4928	1	0	0	2	2	2	0	2	0	0	20	19	29
30.5174	0	2	3	1	0	0	0	0	0	0	17	31	27
30.542	0	2	1	6	1	0	2	1	0	1	22	24	21
30.5666	1	0	0	0	0	2	1	1	0	1	28	26	36
30.5912	2	0	1	0	0	1	2	1	0	1	23	23	18
30.6158	0	1	0	1	1	2	1	0	1	0	30	34	27
30.6404	2	2	0	0	0	0	2	2	1	0	23	20	25
30.665	0	0	0	0	0	0	0	1	0	1	18	20	41
30.6896	0	0	0	2	1	0	1	1	1	0	29	22	13
30.7142	0	1	0	2	0	0	1	1	0	1	26	17	20
30.7387	1	1	2	0	0	0	2	0	2	3	36	27	16
30.7633	0	1	0	1	0	3	0	0	0	1	20	23	20
30.7879	0	1	1	1	0	1	1	0	1	0	24	25	16
30.8125	0	0	0	0	0	0	0	0	0	0	31	24	26
30.8371	1	0	1	1	1	0	1	0	0	1	22	29	26
30.8617	0	0	1	1	0	0	0	0	1	1	21	19	25
30.8863	1	3	0	1	0	1	0	2	0	1	15	22	22
30.9109	1	3	2	1	0	2	0	0	0	1	17	25	24
30.9355	1	0	0	2	0	1	1	0	0	0	23	33	26
30.9601	0	1	0	2	0	0	0	0	0	0	22	21	30
30.9847	2	2	0	1	1	1	0	0	1	1	18	20	14
31.0093	0	2	2	0	1	0	0	0	1	0	12	23	24
31.0338	0	0	0	1	1	1	0	0	0	1	30	20	21
31.0584	0	0	1	3	1	1	1	0	1	2	21	19	18
31.083	0	0	0	1	0	0	0	0	0	2	21	21	21
31.1076	0	1	0	0	2	1	0	0	0	0	20	18	20
31.1322	0	1	1	0	0	0	1	3	0	1	31	20	20
31.1568	0	1	1	0	0	0	1	0	0	1	17	18	21
31.1814	1	1	1	1	1	1	1	1	1	1	30	22	21
31.206	0	0	0	0	1	0	0	0	0	0	25	22	24
31.2306	0	0	0	1	0	0	2	0	0	0	21	17	13
31.2552	0	2	2	1	0	0	0	0	0	1	22	19	24
31.2798	3	0	1	0	0	0	3	2	0	0	17	13	21
31.3043	0	0	1	1	1	0	1	0	0	0	20	22	24
31.3289	0	1	1	2	3	0	1	0	0	1	21	20	24
31.3535	2	1	1	2	1	0	0	1	0	1	25	19	15
31.3781	3	0	0	0	1	0	0	0	1	2	20	15	13
31.4027	1	0	1	1	0	1	2	2	0	0	26	20	18
31.4273	1	2	2	2	0	0	0	0	1	0	17	15	29
31.4519	2	1	0	2	1	0	3	1	0	0	30	18	24
31.4765	1	0	0	0	0	1	0	1	1	1	13	25	15
31.5011	0	1	0	3	1	0	1	0	0	0	27	17	15
31.5257	0	0	0	0	0	1	0	0	0	1	18	12	21
31.5503	1	0	1	0	0	0	0	0	1	2	14	26	15
31.5748	0	2	0	1	0	0	1	1	0	1	19	14	21
31.5994	0	2	1	0	0	0	2	1	1	0	20	20	16
31.624	1	2	1	0	1	1	1	0	2	1	19	25	19
31.6486	0	1	0	0	1	0	1	0	1	0	22	27	16
31.6732	0	0	2	0	1	2	1	0	0	0	18	20	24
31.6978	1	0	0	0	0	0	2	0	0	1	24	18	24
31.7224	1	0	0	0	2	0	2	1	2	0	23	22	23
31.747	0	0	0	0	0	0	2	1	1	0	20	13	18
31.7716	1	0	1	0	1	1	2	0	1	2	20	22	21
31.7962	0	0	0	1	0	1	0	0	1	1	23	14	23
31.8208	0	1	0	0	0	1	1	1	1	0	14	19	16
31.8453	0	0	0	1	2	0	1	0	1	0	18	23	16
31.8699	1	0	0	2	1	0	0	1	0	0	16	26	20
31.8945	0	1	2	0	0	1	0	0	1	0	15	22	23
31.9191	1	0	1	0	1	0	0	0	0	0	14	24	18
31.9437	0	0	0	0	0	1	0	0	0	0	23	12	18
31.9683	1	0	1	1	0	2	1	2	0	0	26	19	19
31.9929	0	0	2	1	0	1	1	0	0	1	15	17	19
32.0175	0	0	1	0	1	0	2	0	1	0	16	13	15
32.0421	3	1	0	0	1	2	1	0	1	0	25	17	12
32.0667	0	1	0	0	0	1	0	0	0	0	16	22	15
32.0913	1	0	0	0	1	0	0	1	0	0	19	15	15
32.1158	0	2	1	0	1	1	1	1	0	1	24	17	12
32.1404	0	1	0	0	0	0	0	0	0	1	17	16	20
32.165	1	0	1	1	1	1	0	1	0	1	6	12	16
32.1896	0	1	1	0	0	2	0	0	1	1	11	29	22
32.2142	2	2	0	1	1	1	0	0	0	1	18	17	10
32.2388	1	0	0	0	0	0	2	1	0	0	13	18	11
32.2634	1	1	1	0	0	0	0	1	0	1	11	16	20
32.288	1	0	0	2	0	0	0	1	1	0	19	21	8
32.3126	0	0	0	0	0	1	2	1	0	0	17	13	17
32.3372	1	0	0	0	0	0	0	0	0	0	9	11	22
32.3618	0	2	2	0	0	0	0	0	0	0	16	14	15
32.3863	0	1	0	1	0	0	1	1	0	0	14	13	16
32.4109	0	1	3	0	0	0	2	0	0	0	9	14	17
32.4355	0	0	1	0	1	0	0	1	2	2	12	22	17
32.4601	1	1	1	0	0	0	0	0	0	0	10	14	18
32.4847	0	0	1	1	0	0	0	1	0	0	14	16	18
32.5093	0	2	1	0	1	2	0	0	0	0	13	15	16
32.5339	0	0	2	2	0	0	0	0	1	1	17	12	12
32.5585	0	1	0	0	0	1	0	1	1	2	14	20	7
32.5831	0	0	0	0	0	1	1	0	0	2	11	11	13
32.6077	1	1	0	1	0	0	1	0	0	0	11	16	14
32.6323	1	1	0	0	1	0	0	1	0	0	18	20	17
32.6568	0	1	0	0	2	0	0	1	1	0	17	9	13
32.6814	0	0	1	0	0	0	1	0	0	0	19	13	12
32.706	1	0	0	0	0	1	1	0	1	0	18	17	9
32.7306	0	1	0	0	0	0	3	0	0	0	16	14	19
32.7552	0	0	0	0	0	1	0	1	0	0	18	12	14
32.7798	1	0	0	0	0	1	0	0	0	1	12	13	11
32.8044	0	0	1	0	0	0	1	0	0	0	14	16	16
32.829	0	0	0	0	0	0	0	1	1	0	16	12	24
32.8536	0	1	0	1	0	1	1	0	0	0	10	16	17
32.8782	0	0	0	0	0	0	0	1	0	0	10	17	17
32.9028	0	1	0	1	0	0	0	0	1	0	5	14	18
32.9273	1	1	2	0	1	1	0	1	2	0	5	17	10
32.9519	0	0	0	0	0	0	0	0	0	0	16	13	16
32.9765	0	0	0	0	1	0	2	1	0	0	7	15	16
33.0011	0	0	0	0	2	1	0	0	1	0	16	7	15
33.0257	1	0	0	1	0	0	2	0	0	0	14	8	9
33.0503	0	2	0	0	0	2	1	0	0	1	18	15	18
33.0749	2	0	1	0	0	1	0	0	0	1	18	15	14
33.0995	0	2	2	0	0	0	1	0	0	0	19	12	7
33.1241	0	0	0	0	0	0	0	0	0	0	15	14	14
33.1487	1	0	1	0	0	0	1	0	0	0	16	13	12
33.1733	2	0	1	1	2	1	0	0	0	0	12	10	11
33.1979	0	1	1	0	0	0	0	0	2	0	9	16	10
33.2224	0	0	0	1	0	0	0	0	1	0	9	14	14
33.247	0	1	0	0	1	1	0	0	0	0	17	11	18
33.2716	0	0	1	1	1	0	1	0	0	0	15	14	9
33.2962	0	0	0	0	0	1	0	0	0	0	13	8	9
33.3208	0	2	0	3	0	0	0	0	0	1	7	12	14
33.3454	1	0	0	1	0	3	0	1	0	0	14	10	14
33.37	1	0	0	0	0	1	0	0	0	0	10	11	12
33.3946	1	0	1	1	1	1	0	0	0	0	11	11	5
33.4192	0	0	0	0	0	0	0	1	0	1	12	12	11
33.4438	0	1	0	0	0	0	0	1	0	1	12	19	11
33.4684	0	0	0	2	0	0	0	0	0	0	11	18	18
33.4929	0	1	0	1	0	0	0	2	0	0	15	10	10
33.5175	1	0	1	0	0	0	0	0	1	0	12	13	13
33.5421	0	0	1	2	0	0	0	0	0	0	14	15	8
33.5667	0	0	1	0	0	1	0	1	0	0	9	11	5
33.5913	2	1	2	0	0	1	0	0	0	0	8	10	17
33.6159	1	2	1	0	0	0	0	1	0	0	11	9	16
33.6405	0	0	0	0	1	0	0	2	1	0	12	10	9
33.6651	1	2	0	1	0	1	0	0	0	0	14	10	7
33.6897	0	0	1	0	0	0	0	0	0	0	9	11	9
33.7143	1	0	0	0	0	0	0	0	0	1	17	11	10
33.7389	0	0	0	0	0	0	2	0	0	0	10	11	6
33.7634	0	1	0	0	1	0	1	0	0	0	9	9	15
33.788	0	0	0	0	0	0	0	0	1	0	10	9	5
33.8126	0	1	1	0	0	0	0	0	0	0	3	12	12
33.8372	0	0	0	1	1	1	0	0	0	0	7	7	5
33.8618	0	0	1	0	0	0	1	0	0	2	7	14	11
33.8864	0	0	0	1	2	0	0	0	0	0	7	8	7
33.911	1	0	0	0	1	0	0	0	0	0	10	9	5
33.9356	0	0	1	0	0	0	1	0	0	0	10	12	5
33.9602	0	0	0	0	1	0	0	0	0	0	14	10	14
33.9848	2	1	2	0	1	0	1	0	0	0	11	8	11
34.0094	0	1	1	0	0	0	0	0	0	1	10	13	9
34.0339	1	0	1	0	0	0	1	0	0	0	9	14	12
34.0585	0	0	0	2	1	1	0	0	0	0	11	15	7
34.0831	0	0	1	0	1	1	0	0	0	0	10	9	9
34.1077	0	1	0	1	1	1	0	0	0	0	7	6	10
34.1323	0	1	0	0	1	1	0	0	0	0	9	8	6
34.1569	0	0	0	0	0	0	1	0	0	1	8	9	3
34.1815	0	1	1	1	1	0	1	0	0	0	12	9	10
34.2061	0	1	1	1	0	0	1	0	0	0	12	13	10
34.2307	0	0	0	0	0	1	0	0	0	0	9	13	8
34.2553	0	0	0	1	0	0	0	0	0	1	11	3	10
34.2799	0	0	2	0	0	0	0	0	0	0	9	8	12
34.3044	1	0	0	0	0	0	0	0	0	0	8	5	8
34.329	0	0	0	1	0	0	0	0	0	0	6	8	7
34.3536	0	0	0	0	0	0	0	0	0	0	15	9	10
34.3782	0	0	0	0	0	1	0	0	0	0	9	9	2
34.4028	0	0	0	0	0	0	1	0	0	0	8	3	10
34.4274	0	0	1	1	1	0	0	0	0	0	5	11	12
34.452	0	1	1	0	0	0	0	0	0	0	6	9	10
34.4766	0	0	1	0	0	0	0	1	0	0	6	6	8
34.5012	0	1	0	0	0	0	0	1	0	0	9	6	8
34.5258	1	0	0	1	0	1	1	0	0	1	4	11	7
34.5504	0	0	0	0	0	0	1	0	0	1	4	13	8
34.5749	0	0	0	1	0	0	0	0	0	0	6	7	7
34.5995	0	0	0	0	0	0	1	0	0	0	5	11	6
34.6241	0	0	0	0	0	0	1	0	0	0	7	8	6
34.6487	0	0	0	1	0	0	0	0	0	0	4	4	8
34.6733	1	1	0	0	1	0	0	0	0	0	5	5	7
34.6979	1	0	0	0	0	0	0	0	1	0	8	2	7
34.7225	0	0	0	0	0	0	0	1	1	0	6	15	13
34.7471	1	0	0	0	0	0	0	0	0	1	7	5	3
34.7717	0	0	0	0	0	0	0	0	0	1	8	3	7
34.7963	0	2	0	0	0	0	0	0	0	0	8	4	8
34.8209	0	0	1	0	0	1	0	0	0	0	7	7	8
34.8454	0	0	0	0	0	0	0	0	0	0	5	7	9
34.87	0	0	1	0	0	0	1	0	0	0	9	7	3
34.8946	0	0	1	1	0	0	0	0	0	0	13	2	4
34.9192	0	0	0	0	0	1	0	0	0	0	15	5	13
34.9438	0	0	1	0	1	0	0	1	0	0	8	7	7
34.9684	0	1	0	0	1	0	0	0	0	0	6	11	5
34.993	0	1	0	0	0	0	0	0	0	0	8	6	5
35.0176	0	0	0	1	0	0	0	0	0	0	10	9	8
35.0422	1	1	0	1	0	0	1	0	0	0	5	4	8
35.0668	0	0	0	0	0	0	0	0	0	0	9	11	3
35.0914	0	0	0	0	0	1	0	1	0	0	3	10	5
35.1159	0	0	1	0	1	0	0	0	0	0	13	6	6
35.1405	0	0	1	0	0	0	0	0	0	0	5	7	8
35.1651	0	0	0	0	1	0	0	0	0	0	5	6	10
35.1897	0	0	0	0	0	0	0	0	0	1	3	3	8
35.2143	0	0	0	1	0	0	1	0	0	0	8	5	4
35.2389	0	1	0	0	0	0	0	0	0	0	3	11	6
35.2635	0	1	2	0	0	1	1	1	0	0	6	11	7
35.2881	0	1	0	0	0	0	0	0	0	2	8	10	7
35.3127	0	0	0	0	0	0	0	1	0	0	5	9	1
35.3373	0	1	0	0	0	0	0	0	1	0	10	5	6
35.3619	0	0	1	0	0	1	1	0	1	1	10	7	9
35.3864	0	0	1	0	0	1	0	0	0	0	4	3	8
35.411	0	0	0	0	0	1	0	0	0	0	7	7	13
35.4356	1	0	0	0	0	0	0	0	1	0	7	4	6
35.4602	0	0	0	0	0	0	0	0	0	0	7	4	5
35.4848	1	0	1	0	0	0	0	0	0	0	4	6	7
35.5094	0	0	2	0	0	0	0	0	0	0	2	6	11
35.534	0	0	1	0	0	0	0	0	0	1	7	6	8
35.5586	0	0	0	0	0	0	0	1	0	0	4	9	7
35.5832	0	1	1	0	0	0	0	0	0	0	11	7	6
35.6078	0	0	0	1	1	1	0	0	0	0	6	6	7
35.6324	0	0	0	0	0	0	0	0	0	0	6	4	3
35.657	0	0	2	1	0	0	0	0	0	0	6	8	9
35.6815	0	1	0	0	0	0	1	0	0	0	5	5	5
35.7061	0	0	1	1	1	0	0	0	0	0	4	2	4
35.7307	0	0	0	0	0	0	0	0	0	0	6	5	6
35.7553	0	0	0	0	0	0	0	0	0	0	5	6	7
35.7799	0	0	0	0	0	0	0	0	0	0	5	5	5
35.8045	0	1	0	0	0	0	0	0	0	0	3	2	5
35.8291	1	0	0	0	0	0	0	0	0	0	5	5	4
35.8537	0	0	0	0	0	0	0	0	0	1	10	8	6
35.8783	0	0	1	1	0	0	2	0	0	0	9	4	9
35.9029	0	0	0	0	0	1	0	0	0	2	4	3	5
35.9275	0	1	0	0	0	0	0	0	1	0	4	2	5
35.952	0	0	1	1	0	0	0	0	0	0	4	6	3
35.9766	0	0	0	1	1	0	0	0	0	0	6	9	5
36.0012	0	0	0	0	0	0	0	0	0	1	4	3	5
36.0258	0	0	0	0	0	0	0	0	0	0	7	4	7
36.0504	2	0	0	0	0	1	0	0	0	0	6	3	3
36.075	0	0	0	0	0	0	0	0	0	0	5	4	6
36.0996	0	0	0	0	0	0	0	0	0	0	5	5	3
36.1242	0	0	1	0	0	0	0	0	0	0	5	4	6
36.1488	0	0	1	0	1	0	0	0	0	0	9	7	9
36.1734	1	0	0	1	0	1	0	0	0	0	2	12	6
36.198	0	0	1	0	0	0	0	0	0	0	5	1	7
36.2225	0	0	0	1	0	0	0	0	0	1	8	3	5
36.2471	0	0	1	0	0	0	0	0	0	1	6	5	3
36.2717	0	0	0	0	2	0	1	0	0	0	9	3	6
36.2963	0	0	0	1	1	1	0	0	0	0	4	6	4
36.3209	1	0	0	1	1	0	1	0	0	0	1	5	5
36.3455	0	0	0	1	1	0	0	0	0	0	4	5	3
36.3701	0	0	1	0	0	1	0	0	0	0	4	2	4
36.3947	0	0	0	0	0	0	0	0	0	1	6	2	5
36.4193	0	0	0	0	0	0	0	0	0	0	2	6	5
36.4439	1	0	0	1	0	0	0	0	0	0	3	2	7
36.4685	0	1	0	0	0	0	0	0	0	0	9	9	2
36.493	0	0	0	0	1	1	0	0	0	0	5	2	3
36.5176	0	0	0	0	0	0	0	0	0	1	3	7	2
36.5422	0	0	0	0	0	0	0	0	0	0	2	10	3
36.5668	0	0	0	1	0	0	0	0	0	0	2	5	4
36.5914	0	0	0	0	0	0	0	0	0	0	3	1	4
36.616	0	1	0	0	0	0	0	0	0	0	1	3	3
36.6406	0	0	0	1	0	0	0	0	0	0	3	4	6
36.6652	0	0	1	0	0	0	0	0	0	0	5	2	3
36.6898	0	0	0	0	0	1	0	0	0	0	6	2	2
36.7144	0	0	0	0	0	0	0	0	1	0	4	2	4
36.739	0	0	0	0	0	0	1	0	0	0	6	4	6
36.7635	0	0	0	0	0	0	0	0	0	1	6	1	3
36.7881	0	1	0	0	0	1	0	0	0	0	4	2	7
36.8127	0	1	0	0	0	0	1	0	0	0	5	5	2
36.8373	0	0	0	0	0	0	1	0	0	0	2	3	2
36.8619	0	0	0	0	0	1	0	0	1	0	1	7	4
36.8865	0	0	0	0	2	0	0	0	0	0	1	3	5
36.9111	0	0	1	0	0	0	0	0	1	0	3	3	4
36.9357	0	0	0	1	0	1	0	0	0	0	1	1	6
36.9603	0	0	0	0	0	0	0	0	0	0	5	5	6
36.9849	0	1	0	0	0	0	0	0	0	0	3	4	1
37.0095	0	0	0	0	0	0	0	0	0	0	3	5	4
37.034	0	0	0	0	0	1	0	0	0	0	6	6	4
37.0586	0	1	2	0	0	0	0	1	1	0	6	4	4
37.0832	0	0	0	0	0	0	0	0	0	0	4	2	4
37.1078	0	1	0	0	0	0	0	0	0	0	1	0	3
37.1324	1	0	0	0	0	0	0	0	0	1	6	3	4
37.157	0	0	0	0	0	0	0	0	0	0	1	4	4
37.1816	0	0	0	0	0	0	0	0	0	0	6	8	4
37.2062	0	1	0	0	0	0	0	0	0	0	8	4	3
37.2308	1	0	1	0	0	0	0	0	0	0	2	3	4
37.2554	0	0	0	0	0	0	0	0	0	1	5	3	4
37.28	0	0	0	0	1	0	0	0	0	0	6	5	5
37.3045	0	0	0	1	0	0	0	1	0	0	6	4	2
37.3291	0	0	0	0	0	0	0	0	0	0	3	3	2
37.3537	0	0	0	0	1	0	0	0	0	0	2	3	5
37.3783	0	1	1	0	0	0	0	0	0	0	0	5	3
37.4029	0	0	2	1	0	0	0	1	0	0	1	6	1
37.4275	0	0	0	1	0	0	1	0	0	0	4	2	5
37.4521	0	0	0	0	0	0	0	0	1	0	4	2	2
37.4767	0	0	0	0	0	0	0	0	0	0	6	2	2
37.5013	0	0	0	0	0	0	1	0	0	0	3	5	3
37.5259	1	1	0	0	0	0	1	0	1	0	3	2	1
37.5505	1	0	0	1	0	0	0	0	0	0	6	1	7
37.575	0	0	0	0	0	0	0	0	0	0	4	5	3
37.5996	0	0	0	0	0	1	0	0	0	0	6	2	2
37.6242	0	0	0	0	0	0	0	0	0	0	4	2	2
37.6488	0	0	0	0	0	0	0	0	0	0	4	4	7
37.6734	0	0	0	0	0	0	0	0	0	0	4	1	4
37.698	0	0	0	0	0	0	0	0	0	0	3	5	2
37.7226	0	0	0	0	0	0	1	0	0	0	2	4	2
37.7472	0	0	0	0	0	0	0	0	0	0	4	2	3
37.7718	0	0	0	0	0	0	0	0	0	0	6	3	1
37.7964	0	0	0	0	0	0	0	0	0	0	2	4	3
37.821	0	0	0	0	0	0	0	0	0	1	4	2	5
37.8455	0	0	0	0	0	0	1	0	0	0	5	1	6
37.8701	0	0	0	0	0	1	0	0	0	0	3	3	0
37.8947	0	0	0	0	0	0	0	0	0	0	2	1	4
37.9193	0	0	0	0	0	0	0	0	0	0	2	1	2
37.9439	0	0	0	0	0	0	0	0	0	0	4	0	4
37.9685	0	0	0	0	0	0	0	0	0	0	5	4	2
37.9931	1	0	0	0	0	0	0	0	0	0	6	0	2
38.0177	0	0	0	1	0	0	0	0	0	0	2	4	2
38.0423	0	0	0	0	0	0	0	0	2	0	6	5	4
38.0669	0	0	0	0	0	0	0	0	0	0	3	1	5
38.0915	0	0	0	0	0	0	0	0	0	0	3	6	3
38.1161	0	0	0	0	0	0	1	0	0	0	2	2	2
38.1406	0	1	0	1	0	0	0	0	1	0	2	3	5
38.1652	0	0	0	0	0	0	0	0	0	0	1	1	1
38.1898	0	0	0	0	0	0	0	0	0	0	0	2	2
38.2144	0	0	0	1	0	0	0	0	0	0	3	4	4
38.239	0	0	0	0	0	0	0	0	0	0	1	4	4
38.2636	0	0	0	0	0	1	0	0	0	0	4	0	3
38.2882	0	0	0	0	0	1	0	0	1	0	5	4	2
38.3128	0	0	0	0	0	0	0	0	0	0	3	4	1
38.3374	0	0	0	0	0	0	0	0	0	0	2	3	3
38.362	0	0	0	0	0	0	0	0	0	0	4	4	2
38.3866	0	0	0	0	0	0	0	0	0	0	1	2	4
38.4111	1	0	0	0	0	0	0	0	0	0	2	2	2
38.4357	0	0	0	0	0	0	0	0	0	0	1	3	2
38.4603	0	0	0	0	1	0	0	0	1	0	3	1	2
38.4849	0	0	0	0	0	0	0	0	0	0	4	3	2
38.5095	0	0	0	0	0	0	0	0	0	0	4	4	3
38.5341	0	0	1	0	0	0	0	0	0	0	0	1	3
38.5587	0	0	0	0	1	0	0	0	0	0	2	1	2
38.5833	0	0	0	1	0	0	0	0	0	0	4	3	0
38.6079	1	0	2	0	0	0	0	0	0	0	0	1	5
38.6325	0	0	0	0	0	0	0	0	0	0	2	2	4
38.6571	0	0	0	0	1	0	2	0	0	1	2	2	1
38.6816	0	0	0	0	0	0	0	0	0	0	5	2	0
38.7062	0	0	0	0	0	0	0	0	0	0	1	3	1
38.7308	0	0	0	0	0	0	1	0	0	1	2	2	2
38.7554	0	0	0	0	0	0	0	0	0	0	2	3	5
38.78	0	0	0	0	0	0	0	0	0	1	3	1	0
38.8046	0	0	0	0	0	0	0	0	0	0	4	0	3
38.8292	0	0	0	0	0	0	0	0	0	0	2	3	3
38.8538	0	0	0	0	0	0	0	0	0	0	1	2	2
38.8784	0	0	0	0	0	0	0	0	1	0	1	4	0
38.903	0	0	0	0	0	0	0	0	0	0	0	2	3
38.9276	0	0	0	0	0	0	0	0	0	0	3	4	2
38.9521	0	0	0	1	0	0	1	0	0	0	1	4	3
38.9767	0	0	0	0	0	1	0	0	0	0	4	3	1
39.0013	0	0	0	0	0	0	0	0	0	0	3	2	2
39.0259	0	0	0	0	0	0	0	0	0	0	1	1	3
39.0505	0	0	0	0	0	1	0	0	0	0	1	1	6
39.0751	0	0	0	1	1	0	0	1	0	0	2	3	4
39.0997	0	0	0	0	0	0	0	0	0	0	2	2	0
39.1243	1	0	0	0	0	0	0	0	0	0	3	4	1
39.1489	0	0	0	0	0	0	0	0	0	0	2	5	0
39.1735	0	0	0	0	1	0	0	0	0	0	3	3	0
39.1981	0	0	0	0	1	0	0	0	0	0	2	0	1
39.2226	0	0	1	1	0	0	0	0	0	0	2	0	2
39.2472	0	0	0	0	0	0	0	0	0	0	3	3	0
39.2718	0	0	0	0	0	0	0	0	0	0	3	3	3
39.2964	0	0	0	0	1	0	0	0	0	0	3	2	1
39.321	0	0	0	1	0	0	0	0	0	0	1	4	2
39.3456	0	0	1	0	0	0	0	0	0	0	0	1	2
39.3702	0	0	0	0	0	1	0	0	0	0	2	1	2
39.3948	0	0	0	0	0	0	0	0	0	0	1	2	0
39.4194	1	0	0	0	0	0	0	0	0	0	3	4	2
39.444	0	0	0	0	1	0	0	0	0	0	1	2	4
39.4686	0	0	0	0	0	0	0	0	0	0	3	2	3
39.4931	0	0	0	0	0	0	0	0	0	0	3	0	1
39.5177	0	0	0	0	0	0	0	0	0	0	0	1	2
39.5423	0	0	0	0	0	0	0	0	0	0	6	5	2
39.5669	0	1	0	0	0	0	0	0	0	0	1	0	0
39.5915	0	0	0	0	0	0	0	0	0	1	6	2	1
39.6161	0	0	0	0	0	0	0	0	0	0	1	2	1
39.6407	0	0	0	0	0	0	0	0	0	0	3	1	1
39.6653	0	0	0	0	0	0	1	0	0	0	3	1	2
39.6899	0	0	0	0	0	0	0	0	0	0	1	1	2
39.7145	0	0	0	0	0	0	0	0	0	0	3	2	0
39.7391	0	0	0	0	0	0	0	0	0	0	1	2	1
39.7636	0	0	0	0	0	1	0	0	0	1	1	1	2
39.7882	0	0	0	0	0	0	0	0	0	0	1	3	1
39.8128	0	0	0	0	0	0	0	1	0	0	2	0	3
39.8374	0	0	0	0	0	0	1	0	0	0	3	0	5
39.862	0	0	0	0	0	0	0	0	0	0	0	0	2
39.8866	0	0	0	0	0	0	0	0	0	0	2	0	1
39.9112	0	0	0	0	0	0	0	0	0	0	1	1	2
39.9358	0	0	0	0	0	0	0	0	0	0	4	5	2
39.9604	0	0	0	0	0	0	0	0	0	0	3	1	0
39.985	0	0	0	0	0	0	0	0	0	0	0	1	2
40.0096	0	0	0	0	0	0	0	0	0	0	3	1	3
40.0341	0	0	0	0	0	0	0	0	0	0	2	1	3
40.0587	0	0	0	0	0	0	0	0	0	0	0	2	2
40.0833	0	0	0	0	0	0	0	0	0	0	2	0	1
40.1079	0	0	0	0	0	0	0	0	0	0	0	2	2
40.1325	0	0	0	0	0	0	0	0	0	0	2	0	1
40.1571	0	0	0	0	0	0	0	0	0	0	1	0	1
40.1817	0	0	0	0	1	0	0	1	0	0	2	1	1
40.2063	0	0	0	0	0	0	0	0	0	0	2	6	1
40.2309	0	0	0	0	0	0	0	0	1	0	1	1	0
40.2555	0	0	0	0	0	0	0	0	0	0	3	3	0
40.2801	0	0	0	0	0	0	0	0	0	0	1	2	1
40.3046	0	0	0	0	0	0	0	0	0	0	1	2	0
40.3292	0	0	0	0	0	0	0	0	0	0	0	2	1
40.3538	0	0	0	0	0	0	0	0	0	0	0	0	1
40.3784	0	0	0	0	0	0	0	0	0	0	3	2	2
40.403	0	0	0	0	0	0	0	0	0	0	0	0	0
40.4276	0	1	0	0	0	0	0	0	0	0	1	1	4
40.4522	0	0	0	0	0	0	0	0	1	0	1	4	0
40.4768	0	0	0	0	0	0	0	0	0	0	2	5	1
40.5014	0	0	0	0	0	0	0	0	0	0	1	1	1
40.526	0	0	2	0	0	0	0	0	0	0	1	1	0
40.5506	0	1	0	0	0	0	0	0	0	0	1	0	2
40.5752	0	0	0	0	0	0	0	0	0	0	0	0	1
40.5997	0	0	1	0	0	0	0	0	0	0	2	4	3
40.6243	0	0	0	0	1	0	0	0	0	0	0	2	2
40.6489	0	0	0	0	0	0	0	0	0	0	0	0	1
40.6735	0	0	0	0	0	0	0	0	0	0	2	3	0
40.6981	1	0	0	0	0	0	0	0	0	0	0	0	2
40.7227	0	0	0	0	0	0	0	0	0	0	1	1	0
40.7473	0	0	0	0	0	0	0	0	0	1	5	2	1
40.7719	0	0	0	0	0	0	0	0	0	0	3	0	0
40.7965	0	0	0	0	0	0	0	0	0	0	2	3	2
40.8211	0	0	0	0	0	0	0	0	0	0	4	0	1
40.8457	0	0	0	0	0	0	0	0	0	0	3	0	2
40.8702	0	0	0	0	0	0	0	0	0	0	0	1	2
40.8948	0	0	0	0	0	0	0	0	0	0	2	3	1
40.9194	1	0	0	0	0	0	0	0	0	1	1	4	0
40.944	0	0	0	1	0	0	0	0	0	0	1	1	2
40.9686	0	0	0	0	0	0	0	0	0	0	2	0	2
40.9932	0	0	0	0	0	0	0	0	0	0	1	1	2
41.0178	0	0	0	0	0	0	0	0	0	0	3	1	0
41.0424	0	1	0	0	0	1	0	0	0	0	2	2	0
41.067	0	0	0	0	0	0	0	0	0	0	0	4	1
41.0916	1	0	1	0	0	0	0	0	0	0	1	3	1
41.1162	0	0	0	0	0	0	0	0	0	0	2	0	1
41.1407	0	1	0	0	0	0	0	0	0	0	0	0	2
41.1653	0	0	0	0	0	1	0	0	0	0	0	2	1
41.1899	0	0	0	0	0	0	0	0	0	0	0	0	1
41.2145	0	0	0	0	0	0	0	0	0	0	1	1	0
41.2391	0	0	0	0	0	0	0	0	0	1	0	2	1
41.2637	0	0	0	0	0	0	0	0	0	0	2	2	0
41.2883	0	0	0	0	0	0	0	0	0	0	3	1	1
41.3129	0	0	0	0	0	0	0	0	0	0	0	1	1
41.3375	0	0	0	0	0	0	0	0	0	0	2	0	0
41.3621	0	0	0	0	0	0	0	0	0	0	0	0	0
41.3867	0	0	0	0	0	0	0	0	0	0	1	1	0
41.4112	0	0	0	0	0	1	0	0	0	0	3	0	2
41.4358	1	0	0	0	0	0	0	0	0	0	2	2	0
41.4604	0	0	0	0	0	0	0	0	0	0	2	0	0
41.485	0	0	0	0	0	0	0	0	0	0	1	0	1
41.5096	0	0	0	0	0	0	0	1	0	0	0	0	0
41.5342	0	0	0	0	0	0	0	0	0	0	4	1	3
41.5588	0	0	0	0	0	0	0	0	0	0	2	0	0
41.5834	1	0	0	0	0	0	0	0	1	0	0	2	0
41.608	0	0	0	0	0	0	0	0	0	0	1	1	2
41.6326	0	0	0	1	0	0	0	0	0	0	2	1	1
41.6572	0	0	0	0	1	0	0	0	0	0	0	1	0
41.6817	0	0	0	0	0	0	0	0	0	0	0	2	2
41.7063	0	1	0	1	0	0	0	0	0	0	0	1	2
41.7309	0	0	0	0	1	0	0	0	0	0	1	1	0
41.7555	0	0	0	0	0	0	0	0	0	0	0	1	0
41.7801	0	0	0	0	0	0	0	0	0	0	0	0	0
41.8047	0	0	0	0	0	0	0	0	0	0	2	1	0
41.8293	0	0	0	0	0	0	0	0	0	0	0	0	0
41.8539	0	0	0	0	0	0	0	0	0	0	0	1	1
41.8785	0	0	0	0	0	0	0	0	0	0	2	0	1
41.9031	0	0	0	0	0	0	0	0	0	0	2	2	3
41.9277	1	0	0	0	0	0	0	0	0	0	1	2	0
41.9522	0	0	0	0	0	0	0	0	0	0	2	0	0
41.9768	0	0	0	0	0	0	0	0	0	0	1	0	1
42.0014	0	0	0	0	0	0	1	0	0	0	4	0	2
42.026	0	0	0	0	0	0	0	0	0	0	1	1	1
42.0506	1	0	0	0	0	0	0	0	0	0	2	1	2
42.0752	0	0	0	0	0	0	0	0	0	0	1	0	0
42.0998	0	0	0	1	0	0	0	0	0	0	2	0	0
42.1244	0	0	0	0	0	0	0	0	0	0	4	0	4
42.149	0	0	0	0	0	0	0	0	0	0	1	1	0
42.1736	0	0	0	0	0	0	0	0	0	0	1	1	1
42.1982	0	0	1	0	0	0	0	0	0	0	0	0	0
42.2227	0	0	0	0	0	0	0	0	0	0	0	0	0
42.2473	0	0	0	0	0	0	0	0	0	0	1	0	2
42.2719	0	0	0	0	0	0	0	0	0	0	0	1	0
42.2965	0	0	0	0	0	0	0	0	0	0	0	0	0
42.3211	0	0	0	0	0	0	0	0	0	0	2	0	1
42.3457	0	0	0	0	0	0	0	0	0	0	1	0	2
42.3703	1	0	0	0	0	0	0	0	0	0	3	0	0
42.3949	0	0	0	0	0	0	0	0	0	0	2	0	1
42.4195	0	0	0	0	0	0	0	0	0	0	0	0	0
42.4441	0	0	0	0	0	0	0	0	0	0	0	0	1
42.4687	0	0	0	0	0	0	0	0	0	0	0	0	0
42.4932	1	0	0	0	0	0	0	0	0	0	0	0	1
42.5178	0	0	0	0	0	0	0	0	0	0	0	1	0
42.5424	0	0	1	0	0	0	0	0	0	0	0	1	0
42.567	0	0	0	0	0	0	0	0	0	0	0	0	1
42.5916	0	0	0	0	0	0	0	0	0	0	2	0	1
42.6162	0	0	0	0	1	0	0	0	0	0	0	1	0
42.6408	0	0	0	0	0	1	0	0	0	0	2	0	2
42.6654	0	0	0	0	0	0	0	0	0	0	3	1	0
42.69	0	0	0	0	0	0	0	0	0	0	2	1	0
42.7146	0	0	0	0	0	0	0	0	0	0	0	0	0
42.7392	0	0	0	0	0	0	0	0	0	0	1	1	1
42.7637	0	0	0	0	0	0	0	0	0	0	1	0	0
42.7883	0	0	0	0	0	0	0	0	0	0	0	0	1
42.8129	0	0	0	0	0	0	0	0	0	0	1	2	1
42.8375	0	0	0	0	0	0	0	0	0	0	1	2	0
42.8621	0	0	0	0	0	0	0	0	0	0	1	2	0
42.8867	0	1	0	0	0	0	0	0	0	0	1	2	1
42.9113	1	0	0	0	0	0	0	0	0	0	0	1	0
42.9359	0	0	0	0	0	0	0	0	0	0	0	0	0
42.9605	0	0	0	0	0	0	0	0	0	0	0	0	1
42.9851	0	0	0	0	0	0	0	0	0	0	0	0	0
43.0097	0	0	0	0	0	0	0	0	0	0	0	2	0
43.0343	0	0	0	0	0	0	0	0	0	0	1	1	0
43.0588	0	0	0	0	0	1	0	0	0	0	4	1	1
43.0834	0	0	0	1	0	0	0	0	0	0	0	0	0
43.108	0	0	0	0	0	0	0	0	0	0	0	0	0
43.1326	0	0	0	0	0	0	0	0	0	0	0	1	0
43.1572	0	0	0	0	0	0	0	0	0	0	3	0	0
43.1818	0	0	0	0	0	0	0	0	0	0	0	2	0
43.2064	0	0	0	0	0	0	0	0	0	0	0	0	0
43.231	0	0	0	0	0	0	0	0	0	0	0	1	0
43.2556	0	1	0	0	0	0	0	0	0	0	1	0	1
43.2802	0	0	0	0	0	0	0	0	0	0	1	1	0
43.3048	0	0	0	0	0	0	0	0	0	0	1	0	0
43.3293	0	0	0	0	0	0	0	0	0	0	2	2	0
43.3539	0	0	0	0	0	0	0	0	0	0	1	0	0
43.3785	0	0	0	0	0	0	0	0	0	0	2	2	0
43.4031	0	0	0	0	0	0	0	0	0	0	1	0	0
43.4277	0	0	0	0	0	0	0	0	0	0	0	1	0
43.4523	0	0	0	0	0	0	0	0	0	0	1	0	0
43.4769	0	0	0	0	0	0	0	0	0	0	0	0	0
43.5015	0	0	0	0	0	0	0	0	0	0	0	3	0
43.5261	0	0	0	0	0	0	0	0	0	0	1	2	1
43.5507	0	0	0	0	0	0	0	0	0	0	0	2	0
43.5753	0	0	1	0	0	0	0	0	0	0	0	1	0
43.5998	0	0	0	0	0	0	0	0	0	0	0	0	0
43.6244	0	0	0	0	0	0	0	0	0	0	0	1	1
43.649	0	0	0	0	0	0	0	0	0	0	2	3	1
43.6736	0	0	0	0	0	0	0	0	0	0	0	0	1
43.6982	0	0	0	0	0	0	0	0	0	0	1	2	2
43.7228	0	0	0	0	0	0	0	0	0	0	0	0	3
43.7474	0	0	0	0	0	0	0	0	0	0	0	0	0
43.772	0	0	0	0	0	0	0	0	0	1	0	0	2
43.7966	0	0	0	0	0	0	0	0	0	0	0	1	0
43.8212	0	0	0	0	0	0	0	0	0	0	0	0	1
43.8458	0	0	0	0	0	0	0	0	0	0	2	0	1
43.8703	0	0	0	0	0	0	0	0	0	0	0	1	0
43.8949	0	0	0	0	0	0	0	0	0	0	0	2	0
43.9195	0	0	0	0	0	0	0	0	0	0	0	0	0
43.9441	0	0	0	0	0	0	0	0	0	0	0	1	1
43.9687	0	0	0	0	0	0	0	0	0	0	0	1	0
43.9933	0	0	0	0	0	0	0	0	0	0	0	1	0
44.0179	0	0	0	0	0	0	0	0	0	0	1	2	1
44.0425	0	0	0	0	0	0	0	0	0	0	1	1	0
44.0671	0	0	0	0	0	0	0	0	0	0	1	0	0
44.0917	0	0	0	0	0	0	0	0	0	0	0	0	1
44.1163	0	0	0	0	0	0	0	0	0	0	0	0	0
44.1408	0	0	0	0	0	0	0	0	0	0	0	0	2
44.1654	0	0	0	0	0	0	0	0	0	0	0	0	0
44.19	0	0	0	0	0	0	0	0	0	0	0	0	1
44.2146	0	0	0	0	0	0	0	0	0	0	1	0	0
44.2392	0	0	0	0	0	0	0	0	0	0	0	0	0
44.2638	0	0	0	0	0	0	0	0	0	0	1	0	1
44.2884	0	0	0	0	0	0	0	0	0	0	0	0	1
44.313	0	0	0	0	0	0	0	0	0	0	1	0	0
44.3376	0	0	0	0	0	0	0	0	0	0	0	1	1
44.3622	0	0	0	0	0	0	0	0	0	0	1	1	1
44.3868	0	1	0	0	0	0	0	0	0	0	0	0	2
44.4113	0	0	0	0	0	0	0	0	0	0	0	0	2
44.4359	0	0	0	0	0	0	0	0	0	0	1	0	0
44.4605	0	0	0	0	0	0	0	0	0	0	0	0	0
44.4851	0	0	0	0	0	0	0	0	0	0	0	0	0
44.5097	0	0	0	0	0	0	0	0	0	0	0	1	0
44.5343	0	0	0	0	0	0	0	0	0	0	0	2	0
44.5589	0	0	0	0	0	0	0	0	0	0	0	0	1
44.5835	0	0	0	0	0	0	0	0	0	0	1	0	1
44.6081	0	0	0	0	0	0	0	0	0	0	1	0	0
44.6327	0	0	0	0	0	0	0	0	0	0	0	1	0
44.6573	0	0	0	0	0	0	0	0	0	0	0	2	0
44.6818	0	0	0	0	0	0	0	0	0	0	1	0	1
44.7064	0	0	0	0	0	0	0	0	0	0	0	0	0
44.731	0	0	0	0	0	0	0	0	0	0	0	0	1
44.7556	0	0	0	0	0	0	0	0	0	0	0	1	0
44.7802	0	0	0	0	0	0	0	0	0	0	0	0	0
44.8048	0	0	0	0	0	0	0	0	0	0	1	1	1
44.8294	0	0	0	0	0	0	0	0	0	0	0	0	0
44.854	0	0	0	0	0	0	0	0	0	0	0	0	1
44.8786	0	0	0	0	0	0	0	0	0	0	0	0	1
44.9032	0	0	0	0	0	0	0	0	0	0	0	0	0
44.9278	0	0	0	0	0	0	0	0	0	0	0	0	0
44.9523	0	0	0	0	1	0	0	0	0	0	0	1	0
44.9769	0	0	1	0	0	0	0	0	0	0	1	0	1
45.0015	0	0	0	0	0	0	0	0	0	0	1	2	0
45.0261	0	0	0	0	0	0	0	0	0	0	0	1	0
45.0507	0	0	0	0	0	0	0	0	0	0	0	0	1
45.0753	0	0	0	0	1	0	0	0	0	0	0	0	0
45.0999	0	1	0	0	0	0	0	0	0	0	1	0	0
45.1245	0	0	0	0	0	0	0	0	0	0	0	0	0
45.1491	0	0	0	0	0	0	0	0	0	0	1	1	0
45.1737	0	0	0	0	0	0	0	0	0	0	0	1	0
45.1983	0	0	0	0	0	0	0	0	0	0	1	0	0
45.2228	0	0	0	0	0	0	0	0	0	0	0	0	0
45.2474	0	0	0	0	0	0	0	0	0	0	0	0	0
45.272	0	0	0	0	0	0	0	0	0	0	0	0	1
45.2966	0	0	0	1	0	0	0	0	0	0	0	0	0
45.3212	0	0	0	0	0	0	0	0	0	0	1	0	0
45.3458	0	0	0	0	0	0	0	0	0	0	1	0	0
45.3704	0	0	0	0	0	0	0	0	0	0	1	0	0
45.395	0	0	1	0	0	0	0	0	0	0	0	0	0
45.4196	0	0	0	0	0	0	0	0	0	0	0	0	1
45.4442	0	0	0	0	0	0	0	0	0	0	0	0	0
45.4688	0	0	0	0	0	0	0	0	0	0	0	0	0
45.4933	0	0	0	0	0	0	0	1	0	0	2	0	0
45.5179	0	0	0	0	0	0	0	0	0	0	0	0	0
45.5425	0	0	0	0	0	0	0	0	0	0	1	0	1
45.5671	0	0	0	0	0	0	0	0	0	0	0	0	1
45.5917	0	0	0	0	0	0	0	0	0	0	0	0	0
45.6163	0	0	0	0	0	0	0	0	0	0	0	0	0
45.6409	0	0	0	0	0	0	0	0	0	0	0	0	0
45.6655	0	0	0	0	0	0	0	0	0	0	0	0	0
45.6901	0	0	0	0	0	0	0	0	0	0	1	2	1
45.7147	0	0	0	0	0	0	0	0	0	0	0	1	0
45.7393	0	0	0	0	0	0	0	0	0	0	0	0	0
45.7639	0	0	0	0	0	0	0	0	0	0	0	0	0
45.7884	0	0	0	0	0	0	0	0	0	0	1	0	2
45.813	0	0	0	0	0	0	0	0	0	0	0	0	1
45.8376	0	0	1	0	0	0	0	0	0	0	0	0	0
45.8622	0	0	0	0	0	0	0	0	0	0	0	0	0
45.8868	0	0	0	0	0	0	0	0	0	0	0	0	1
45.9114	0	0	0	0	0	0	0	0	0	0	1	0	0
45.936	0	0	0	0	0	0	0	0	0	0	1	0	0
45.9606	0	0	0	0	0	0	0	0	0	0	1	0	1
45.9852	0	0	0	0	0	0	0	0	0	0	0	0	1
46.0098	0	0	0	0	0	0	0	0	0	0	0	1	1
46.0344	0	0	0	0	0	0	0	0	0	0	0	0	0
46.0589	0	0	0	0	0	0	0	0	0	0	0	0	1
46.0835	0	0	0	0	0	0	0	0	0	0	0	0	0
46.1081	0	0	0	0	0	0	0	0	0	0	0	0	0
46.1327	0	0	0	0	0	0	0	0	0	0	0	1	0
46.1573	0	0	0	0	0	0	0	0	0	0	0	1	0
46.1819	0	0	0	0	0	0	0	0	0	0	0	0	0
46.2065	0	0	0	0	0	0	0	0	0	0	0	0	0
46.2311	0	0	0	0	0	0	0	0	0	0	0	0	0
46.2557	0	0	0	0	0	0	0	0	0	0	0	1	1
46.2803	0	0	0	0	0	0	0	0	0	0	0	0	0
46.3049	0	0	0	0	0	0	0	0	0	0	0	0	0
46.3294	0	0	0	0	0	0	0	0	0	0	0	0	0
46.354	0	0	0	0	0	0	0	0	0	0	0	0	0
46.3786	0	0	0	0	0	0	0	0	0	0	0	0	0
46.4032	0	0	0	0	0	0	0	0	0	0	0	1	0
46.4278	0	0	0	0	0	0	0	0	0	0	0	0	0
46.4524	0	0	0	0	0	0	0	0	0	0	0	0	0
46.477	0	0	0	0	0	0	0	0	0	0	0	0	0
46.5016	0	0	0	0	0	0	0	0	0	0	0	0	0
46.5262	0	0	0	0	0	0	0	0	0	0	1	0	0
46.5508	0	0	0	0	0	0	0	0	0	0	0	0	0
46.5754	0	0	0	0	0	0	0	0	0	0	0	0	0
46.5999	0	0	0	0	0	0	0	0	0	0	0	1	0
46.6245	0	0	0	0	0	0	0	0	0	0	0	0	1
46.6491	0	0	0	0	0	0	0	0	0	0	0	0	0
46.6737	0	0	0	0	0	0	0	0	0	0	0	0	0
46.6983	1	0	0	0	0	0	0	1	0	0	0	0	0
46.7229	0	0	0	0	0	0	0	0	0	0	0	0	0
46.7475	0	0	0	0	0	0	0	0	0	0	0	0	0
46.7721	0	0	0	0	0	0	0	0	0	0	0	0	0
46.7967	0	0	0	0	0	0	0	0	0	0	0	0	1
46.8213	0	0	0	0	0	0	0	0	0	0	1	1	0
46.8459	0	0	0	0	0	0	0	0	0	0	0	0	0
46.8704	0	0	0	0	0	0	0	0	0	0	0	0	0
46.895	0	0	0	0	0	0	0	0	0	0	0	0	0
46.9196	0	0	0	0	0	0	0	0	0	0	0	1	2
46.9442	0	0	0	0	0	0	0	0	0	0	0	0	1
46.9688	0	0	0	0	0	0	0	0	0	0	0	0	0
46.9934	0	0	0	0	0	0	0	0	0	0	0	0	0
47.018	0	0	0	0	0	0	0	0	0	0	0	0	0
47.0426	0	0	0	0	0	0	0	0	0	0	0	0	0
47.0672	0	0	0	0	0	0	0	0	0	0	0	0	0
47.0918	0	0	0	0	0	0	0	0	0	0	1	0	0
47.1164	0	0	0	0	0	0	0	0	0	0	0	0	0
47.1409	0	0	0	0	0	0	0	0	0	0	0	0	1
47.1655	0	0	0	0	0	0	0	0	0	0	0	0	0
47.1901	0	0	0	0	0	0	0	0	0	0	0	1	0
47.2147	0	0	0	0	0	0	0	0	0	0	0	0	1
47.2393	0	0	0	0	0	0	0	0	0	0	0	0	1
47.2639	0	0	0	0	0	0	0	0	0	0	0	1	0
47.2885	0	0	0	0	0	0	0	0	0	0	0	0	0
47.3131	0	0	0	0	0	0	0	0	0	0	0	0	1
47.3377	0	0	0	0	0	0	0	0	0	0	1	0	0
47.3623	0	0	0	0	0	0	0	0	0	0	0	0	1
47.3869	0	0	0	0	0	0	0	0	0	0	1	0	0
47.4114	0	0	0	0	0	0	0	0	0	0	0	0	1
47.436	0	0	0	0	0	0	0	0	0	0	0	0	1
47.4606	0	0	0	0	0	0	0	0	0	0	0	0	0
47.4852	0	0	0	0	0	0	0	0	0	0	1	2	1
47.5098	0	0	0	0	0	0	0	0	0	0	0	0	0
47.5344	0	0	0	0	0	0	0	0	0	0	0	1	2
47.559	0	0	0	0	0	0	0	0	0	0	1	0	0
47.5836	0	0	0	0	0	0	0	0	0	0	0	2	1
47.6082	0	0	0	0	0	0	0	0	0	0	0	0	0
47.6328	0	0	0	0	0	0	0	0	0	0	1	0	0
47.6574	0	0	0	0	0	0	0	0	0	0	0	0	0
47.6819	0	0	0	0	0	0	0	0	0	0	0	1	0
47.7065	0	0	0	0	0	0	1	0	0	0	0	0	0
47.7311	0	0	0	0	0	0	0	0	0	0	0	0	0
47.7557	0	0	0	0	0	0	0	0	0	0	0	1	0
47.7803	0	0	0	0	0	0	0	0	0	0	0	0	0
47.8049	0	0	0	0	0	0	0	0	0	0	0	0	0
47.8295	0	0	0	0	0	0	0	0	0	0	0	1	1
47.8541	0	0	0	0	0	0	0	0	0	0	0	0	0
47.8787	0	0	0	0	0	1	0	0	0	0	0	0	0
47.9033	0	0	0	0	0	0	0	0	0	0	0	1	1
47.9279	0	0	0	1	0	0	0	0	0	0	0	0	0
47.9524	0	0	0	0	0	0	0	0	0	0	0	0	0
47.977	0	0	0	0	0	0	0	0	0	0	0	0	0
48.0016	0	0	0	0	0	0	0	0	0	0	1	0	0
48.0262	0	0	0	0	0	0	0	0	0	0	0	0	0
48.0508	0	0	0	0	0	0	0	0	0	0	0	0	0
48.0754	0	0	0	0	0	0	0	0	0	0	0	0	0
48.1	0	0	0	0	0	0	0	0	0	0	0	0	0
48.1246	0	0	0	0	0	0	0	0	0	0	1	0	0
48.1492	0	0	0	0	0	0	0	0	0	0	0	0	0
48.1738	0	0	0	0	0	0	0	0	0	0	0	0	0
48.1984	0	0	0	0	0	0	0	0	0	0	1	0	0
48.223	0	0	0	0	0	0	0	0	0	0	1	0	1
48.2475	0	0	0	0	0	0	0	0	0	0	1	0	0
48.2721	0	0	0	0	0	0	0	0	0	0	0	0	1
48.2967	0	0	0	0	0	0	0	0	0	0	0	0	0
48.3213	0	0	0	0	0	0	0	0	0	0	0	0	1
48.3459	0	0	0	0	0	0	0	0	0	0	0	0	0
48.3705	0	1	0	0	0	0	0	0	0	0	0	2	0
48.3951	0	0	0	0	0	0	0	0	0	0	0	0	0
48.4197	0	0	0	0	0	0	0	0	0	0	0	0	1
48.4443	0	0	0	0	0	0	0	0	0	0	0	0	0
48.4689	0	0	0	0	0	0	0	0	0	0	0	0	0
48.4935	0	0	0	0	0	0	0	0	0	0	0	0	0
48.518	0	0	0	0	0	0	0	0	0	0	0	0	1
48.5426	0	0	0	0	0	0	0	0	0	0	1	0	0
48.5672	0	0	0	0	0	0	0	0	0	0	0	0	0
48.5918	0	0	0	0	0	0	0	0	0	0	0	1	0
48.6164	0	0	0	0	0	0	0	0	0	0	0	0	0
48.641	0	0	0	0	0	0	0	0	0	0	0	1	0
48.6656	0	0	0	0	0	0	0	0	0	0	0	0	0
48.6902	0	0	0	0	0	0	0	0	0	0	0	0	2
48.7148	0	0	0	0	0	0	0	0	0	0	0	0	0
48.7394	0	0	0	0	0	0	0	0	0	0	0	0	0
48.764	0	0	0	0	0	0	0	0	0	0	1	0	0
48.7885	0	0	0	0	0	0	0	0	0	0	0	0	0
48.8131	0	0	0	0	0	0	0	0	0	0	0	0	0
48.8377	0	0	0	0	0	0	0	0	0	0	0	0	0
48.8623	0	0	0	0	0	0	0	0	0	0	0	0	0
48.8869	0	0	0	0	0	0	0	0	0	0	1	1	0
48.9115	0	0	0	0	0	0	0	0	0	0	0	1	0
48.9361	0	0	0	0	0	0	0	0	0	0	0	0	1
48.9607	0	0	0	0	0	0	0	0	0	0	0	2	0
48.9853	0	0	0	0	0	0	0	0	0	0	0	0	1
49.0099	0	0	0	0	0	0	0	0	0	0	0	1	0
49.0345	0	0	0	0	0	0	0	0	0	0	1	0	0
49.059	0	0	0	0	0	0	0	0	0	0	0	0	0
49.0836	0	0	0	0	0	0	0	0	0	0	0	1	0
49.1082	0	0	0	0	0	0	0	0	0	0	0	0	0
[truncated: 50 more rows]
